# Supplementary material
Source: publisher site journal article supplement (https://www.spandidos-publications.com/5636/downloadSupplementary)
Supplement: Supplementary file 1 [file downloadSupplementary]

## Sheet: Sheet1
Item	Description
Pre-miRNA Index	Pre-miRNA Cluster Index
miRNA_Index	mature miRNA
miR_name	The miR_name is composed of the 1st known miR name in a cluster, a underscore, and a matching annotation: such as
	L-n means the miRNA_seq (detected) is n base less than known rep_miRSeq in the left side;
	R-n means the miRNA_seq (detected) is n base less than known rep_miRSeq in the right side;
	L+n means the miRNA_seq (detected) is n base more than known rep_miRSeq in the left side;
	R+n means the miRNA_seq (detected) is n base more than known rep_miRSeq in the right side;
	2ss5TC13TA means 2 substitution (ss), which are T->C at position 5 and T->A at position 13
	if there is no matching annotation, the miRNA_seq (detected) is exactly same as known rep_miRSeq.
	New discovered 5p/3p sequence has been annotated as p3/p5: which is directly differentiate with the reported sequences,
miR_seq	is a read at 5' or 3' of maximum mapped score in each cluster.
len	miR_seq length
genome ID	Reference Genome Information
strand	strand "+" or "-"
start	pre-miRNA start position
end	Pre-miRNA end position
pre-miRNA_seq	pre-miRNA sequence
#mir/MIR	mapped mir numbers in miRbase, the number in this item eaquals to the sum of mirIDs
mirIDs	is all mirID in a cluster, seprated by ,
rep_mirID	is the representative known mirID
rep_mirSeq	is the representative known mir sequence
rep_miRID	is the representative known miRID
rep_miRSeq	is the representative known miR sequence
type	is 5' or 3', which means the cluster appears at 5' or 3' end
Sequence in miRbase	New, miRNA identified in this study and not reported in miRBase,mainly for new reported 5p or 3p sequence; Diff, confirming miRNA sequences in miRBase, but different sequences are reported in our study; and Yes, confirming miRNA sequences in miRBase.
group	gp1a:Reads were mapped to miRNAs/pre-miRNAs of specific species in miRbase and the pre-miRNAs were further mapped to genome & EST.
	gp1b:Reads were mapped to (except for specific species) miRNAs/pre-miRNAs of selected species in miRbase and the pre-miRNAs were further mapped to genome & EST.
	gp2a:Reads were mapped to miRNAs/pre-miRNAs of selected species in miRbase and the mapped pre-miRNAs were not further mapped to genome, but the reads (and of course the miRNAs of the pre-miRNAs) were mapped to genome. The extended genome sequences from the genome loci may form hairpins.
	gp2b:Reads were mapped to miRNAs/pre-miRNAs of selected species in miRbase and the mapped pre-miRNAs were not further mapped to genome, but the reads (and of course the miRNAs of the pre-miRNAs) were mapped to genome. The extended genome sequences from the genome loci may not form hairpins.
	gp3:Reads were mapped to miRNAs/pre-miRNAs of selected species in miRbase and the mapped pre-miRNAs were not further mapped to genome, and the reads were not mapped to genome, either. but the reads were mapped to the miRNAS(Matures)
	gp4:Reads were not mapped to pre-miRNAs of selected species in miRbase. But the reads were mapped to genome & the extended genome sequences from genome may form hairpins.
SS	Secondary Structure
	Criteria:
	1.number of nucleotides in one bulge in stem : <= 12
	2.number of base pairs in the stem region of the predicted hairpin : >= 16
	3.cutoff of free energy : kCal/mol <= -15
	4.length of hairpin : up and down stems + terminal loop >= 50
	8.number of biased bulges in mature region : <= 2
	10.number of base pairs in the mature region of the predicted hairpin : >= 12
	11.percent of mature in stem : >= 80
hairpinLen	pre-miRNA length
CG%	GC Content
dG	Free energy
raw	Raw data; from #reads(all),is the number of reads for isoform at 5' or 3' end.
norm	Normalized data
Expression Level	High:The number of reads in the following reported miRNAs is higher than the average copy of the data set.Medium:The number of reads in the following reported miRNAs is higher than 10 and less than average copy of the data set.Low:The number of reads in the following reported miRNAs is less than 10
Summary of known and predicted miRNA in this study.
Pre-miRNA Index	miRNA_Index	miR_name	miR_seq	len	genomeID	strand	start	end	pre-miRNA_seq	#mir/MIR	mirIDs,	rep_mirID	rep_mirSeq	rep_miRID	rep_miRSeq	type	Sequence in miRbase	group	SS	hairpinLen	CG%	dG	MSC_Exos_1(raw)	MSC_Exos_2(raw)	MSC_Exos_3(raw)	MSC_Exos_1(norm)	MSC_Exos_2(norm)	MSC_Exos_3(norm)	Expression level
1	1	hsa-miR-1-3p	TGGAATGTAAAGAAGTATGTAT	22	chr18	-	21828996	21829106	agctaacaacttagtaatacctactcagagtacatacttctttatgtacccatatgaacatacaatgctaTGGAATGTAAAGAAGTATGTATttttggtaggcaataaacc	16	hsa-mir-1-2,ppa-mir-1,bta-mir-1-2,ptr-mir-1-2,ggo-mir-1,mml-mir-1-2,cja-mir-1a-1,mmu-mir-1a-2,eca-mir-1-1,mdo-mir-1-1,cfa-mir-1-2,efu-mir-1-1,cpo-mir-1a,pal-mir-1-1,ocu-mir-1-2,dno-mir-1-2,	hsa-mir-1-2	acctactcagagtacatacttctttatgtacccatatgaacatacaatgctaTGGAATGTAAAGAAGTATGTATttttggtaggc	hsa-miR-1-3p	TGGAATGTAAAGAAGTATGTAT	3'	Yes	gp1a	.(((((....)))))....(((((..((((((((((((((((((..(..(((((..............))))).)..))))))))))))))))))..))))).........	83	32.4	-36.6	29	39	32	26.3485	32.9901	42.7169	middle
2	2	hsa-miR-1-3p	TGGAATGTAAAGAAGTATGTAT	22	chr20	+	62554300	62554390	cctgcttgggaaacatacttctttatatgcccatatggacctgctaagctaTGGAATGTAAAGAAGTATGTATctcaggccgggacctctc	15	hsa-mir-1-1,ppy-mir-1-1,ptr-mir-1-1,mml-mir-1-1,cja-mir-1a-2,mmu-mir-1a-1,bta-mir-1-1,eca-mir-1-2,mdo-mir-1-2,cfa-mir-1-1,efu-mir-1-2,rno-mir-1b,pal-mir-1-2,dno-mir-1-1,chi-mir-1,	hsa-mir-1-1	tgggaaACATACTTCTTTATATGCCCATatggacctgctaagctaTGGAATGTAAAGAAGTATGTATctca	hsa-miR-1-3p	TGGAATGTAAAGAAGTATGTAT	3'	Yes	gp1a	((.((((((((.((((((((((((((((..((((((((.....)))...))))).)))))))))))))))).)))))))).))........	83	45.1	-40.7	29	39	32	26.3485	32.9901	42.7169	middle
3	3	hsa-let-7f-5p	TGAGGTAGTAGATTGTATAGTT	22	chr9	+	94176333	94176442	aaaacattgctctatcagagTGAGGTAGTAGATTGTATAGTTgtggggtagtgattttaccctgttcaggagataactatacaatctattgccttccctgaggagtagac	27	hsa-let-7f-1,ppy-let-7f-1,mml-let-7f-1,bta-let-7f-1,mdo-let-7f-1,ptr-let-7f-1,ggo-let-7f,ppa-let-7f,nle-let-7f,oga-let-7f,mmr-let-7f,dma-let-7f,sbo-let-7f,cfa-let-7f,pal-let-7f,dno-let-7f-1,ocu-let-7f-1,tch-let-7f,cja-let-7f,mmu-let-7f-1,rno-let-7f-1,eca-let-7f,efu-let-7f,ssc-let-7f-2,cpo-let-7f-1,chi-let-7f,cgr-let-7f,	hsa-let-7f-1	tcagagTGAGGTAGTAGATTGTATAGTTgtggggtagtgattttaccctgttcaggagataaCTATACAATCTATTGCCTTCCCtga	hsa-let-7f-5p	TGAGGTAGTAGATTGTATAGTT	5'	Yes	gp1a	......(((((((.((((...((((((((((((((((((((((((((((((.....))))))).........)))))))))))))))))))))))..)))))))))))..	102	40	-49.5	2265.5	2116	1346.5	2058.36	1789.92	1797.45	high
4	4	hsa-let-7d-5p	AGAGGTAGTAGGTTGCATAGTT	22	chr9	+	94178825	94178931	aaatgggttcctaggaAGAGGTAGTAGGTTGCATAGTTttagggcagggattttgcccacaaggaggtaaCTATACGACCTGCTGCCTTTCTtagggccttattatt	19	hsa-let-7d,ppy-let-7d,mml-let-7d,oar-let-7d,ptr-let-7d,cja-let-7d,mmu-let-7d,bta-let-7d,eca-let-7d,mdo-let-7d,cfa-let-7d,efu-let-7d,rno-let-7d,ssc-let-7d,cpo-let-7d,ocu-let-7d,dno-let-7d,chi-let-7d,cgr-let-7d,	hsa-let-7d	cctaggaAGAGGTAGTAGGTTGCATAGTTttagggcagggattttgcccacaaggaggtaaCTATACGACCTGCTGCCTTTCTtagg	hsa-let-7d-5p	AGAGGTAGTAGGTTGCATAGTT	5'	Yes	gp1a	.(((..(..((((((.(((((((((((((((.((((((...((((((.....))))))..........)))))).)))))))))))))))))))))..)..)))...	103	44.9	-48.7	926	1025	494	841.335	867.047	659.442	high
4	5	hsa-let-7d-3p	CTATACGACCTGCTGCCTTTCT	22	chr9	+	94178825	94178931	aaatgggttcctaggaAGAGGTAGTAGGTTGCATAGTTttagggcagggattttgcccacaaggaggtaaCTATACGACCTGCTGCCTTTCTtagggccttattatt	19	hsa-let-7d,ppy-let-7d,mml-let-7d,oar-let-7d,ptr-let-7d,cja-let-7d,mmu-let-7d,bta-let-7d,eca-let-7d,mdo-let-7d,cfa-let-7d,efu-let-7d,rno-let-7d,ssc-let-7d,cpo-let-7d,ocu-let-7d,dno-let-7d,chi-let-7d,cgr-let-7d,	hsa-let-7d	cctaggaAGAGGTAGTAGGTTGCATAGTTttagggcagggattttgcccacaaggaggtaaCTATACGACCTGCTGCCTTTCTtagg	hsa-let-7d-3p	CTATACGACCTGCTGCCTTTCT	3'	Yes	gp1a	.(((..(..((((((.(((((((((((((((.((((((...((((((.....))))))..........)))))).)))))))))))))))))))))..)..)))...	103	44.9	-48.7	114	138	87	103.577	116.734	116.137	middle
5	6	hsa-let-7e-5p	TGAGGTAGGAGGTTGTATAGTT	22	chr19	+	51692773	51692881	acctgccgcgccccccgggcTGAGGTAGGAGGTTGTATAGTTgaggaggacacccaaggagatcactatacggcctcctagctttccccaggctgcgccctgcacggga	22	hsa-let-7e,ppy-let-7e,mml-let-7e,bta-let-7e,ptr-let-7e,ggo-let-7e,chi-let-7e,ppa-let-7e,oga-let-7e,tch-let-7e,cja-let-7e,nle-let-7e,sbo-let-7e,mmu-let-7e,rno-let-7e,eca-let-7e,cfa-let-7e,efu-let-7e,ssc-let-7e,cpo-let-7e,pal-let-7e,cgr-let-7e,	hsa-let-7e	cccgggcTGAGGTAGGAGGTTGTATAGTTgaggaggacacccaaggagatcaCTATACGGCCTCCTAGCTTTCCccagg	hsa-let-7e-5p	TGAGGTAGGAGGTTGTATAGTT	5'	Yes	gp1a	.(((((.((((..((.(((..(((.(((((((..(((((((.((...((....)).......)))))))))..))))))).)))..))).))..))))...))).))..	106	63.3	-50.4	289.45	254	142.5	262.985	214.858	190.224	middle
6	7	hsa-let-7a-5p	TGAGGTAGTAGGTTGTATAGTT	22	chr22	+	46112732	46112844	agaccgactgccctttggggTGAGGTAGTAGGTTGTATAGTTtggggctctgccctgctatgggataaCTATACAATCTACTGTCTTTCCtgaagtggctgtaatatctgcgg	22	hsa-let-7a-3,ppy-let-7a-3,mml-let-7a-3,bta-let-7a-3,ptr-let-7a-3,ggo-let-7a,ppa-let-7a-1,nle-let-7a-1,dma-let-7a-1,pal-let-7a-1,cja-let-7a-2,oga-let-7a-1,mmr-let-7a-1,mmu-let-7c-2,rno-let-7c-2,eca-let-7a-2,mdo-let-7a-3,cfa-let-7a-1,cpo-let-7a-3,ocu-let-7a-3,chi-let-7a,cgr-let-7c-2,	hsa-let-7a-3	gggTGAGGTAGTAGGTTGTATAGTTtggggctctgccctgctatgggataaCTATACAATCTACTGTCTTTCct	hsa-let-7a-5p	TGAGGTAGTAGGTTGTATAGTT	5'	Yes	gp1a	(((...((.((((((..(((...(..((((((((((((((((.(((((...)))))..........))))))))))))))))..)..)))..))).))).))....)))....	109	48.7	-45	1820.95	1730.5	917.833	1654.46	1463.83	1225.22	high
6	8	hsa-let-7a-3p_R+1_1	CTATACAATCTACTGTCTTTCC	22	chr22	+	46112732	46112844	agaccgactgccctttggggTGAGGTAGTAGGTTGTATAGTTtggggctctgccctgctatgggataaCTATACAATCTACTGTCTTTCCtgaagtggctgtaatatctgcgg	22	hsa-let-7a-3,ppy-let-7a-3,mml-let-7a-3,bta-let-7a-3,ptr-let-7a-3,ggo-let-7a,ppa-let-7a-1,nle-let-7a-1,dma-let-7a-1,pal-let-7a-1,cja-let-7a-2,oga-let-7a-1,mmr-let-7a-1,mmu-let-7c-2,rno-let-7c-2,eca-let-7a-2,mdo-let-7a-3,cfa-let-7a-1,cpo-let-7a-3,ocu-let-7a-3,chi-let-7a,cgr-let-7c-2,	hsa-let-7a-3	gggTGAGGTAGTAGGTTGTATAGTTtggggctctgccctgctatgggataaCTATACAATCTACTGTCTTTCct	hsa-let-7a-3p	CTATACAATCTACTGTCTTTC	3'	Diff	gp1a	(((...((.((((((..(((...(..((((((((((((((((.(((((...)))))..........))))))))))))))))..)..)))..))).))).))....)))....	109	48.7	-45	6.83333	9.5	5.16667	6.20855	8.03604	6.897	low
7	9	hsa-miR-7-5p	TGGAAGACTAGTGATTTTGTTGTT	24	chr19	+	4770670	4770779	agattagagtggctgtggtctagtgctgtgTGGAAGACTAGTGATTTTGTTGTTctgatgtactacgacaacaagtcacagccggcctcatagcgcagactcccttcgac	13	hsa-mir-7-3,ptr-mir-7-3,ppa-mir-7-3,ppy-mir-7-3,ggo-mir-7-3,mml-mir-7-3,bta-mir-7-3,cfa-mir-7-3,efu-mir-7c,cpo-mir-7-3,pal-mir-7b-2,dno-mir-7-3,tch-mir-7-1,	hsa-mir-7-3	agattagagtggctgtggtctagtgctgtgTGGAAGACTAGTGATTTTGTTGTTctgatgtactacgacaacaagtcacagccggcctcatagcgcagactcccttcgac	hsa-miR-7-5p	TGGAAGACTAGTGATTTTGTTGTT	5'	Yes	gp1a	...(..(((.((....(((((.((((((((.((....((.((((.((((((((..((......))..))))))))))))))....)).))))))))))))))))))..).	106	49.1	-37.2	41.3333	34.3333	21.6667	37.5542	29.0425	28.9229	middle
8	10	hsa-let-7i-5p	TGAGGTAGTAGTTTGTGCTGTT	22	chr12	+	62603671	62603778	cccgacaccatggccctggcTGAGGTAGTAGTTTGTGCTGTTggtcgggttgtgacattgcccgctgtggagataactgcgcaagctactgccttgctagtgctggtg	23	hsa-let-7i,ppy-let-7i,bta-let-7i,mdo-let-7i,oar-let-7i,ptr-let-7i,ggo-let-7i,chi-let-7i,ppa-let-7i,cja-let-7i,nle-let-7i,cpo-let-7i,dno-let-7i,ocu-let-7i,tch-let-7i,mml-let-7i,mmu-let-7i,rno-let-7i,ssc-let-7i,aja-let-7i,oga-let-7i,pal-let-7i,cgr-let-7i,	hsa-let-7i	ctggcTGAGGTAGTAGTTTGTGCTGTTggtcgggttgtgacattgcccgctgtggagataaCTGCGCAAGCTACTGCCTTGCTa	hsa-let-7i-5p	TGAGGTAGTAGTTTGTGCTGTT	5'	Yes	gp1a	.....((((..(((.(((((.(((((((((((((((((.(((((.(((((.........)))))))........))).)))))))))))))))))))))).)))))))	103	57.4	-51.9	2083	2053	1466	1892.55	1736.63	1956.97	high
9	11	hsa-miR-7-5p	TGGAAGACTAGTGATTTTGTTGTT	24	chr15	+	88611825	88611934	ctggatacagagtggaccggctggccccatcTGGAAGACTAGTGATTTTGTTGTTgtcttactgcgctcaacaacaaatcccagtctacctaatggtgccagccatcgca	13	hsa-mir-7-2,ptr-mir-7-2,ppy-mir-7-2,ggo-mir-7-2,ppa-mir-7-2,mml-mir-7-2,mne-mir-7-2,eca-mir-7-1,cfa-mir-7-2,ssc-mir-7-1,cpo-mir-7-2,dno-mir-7-2,tch-mir-7-2,	hsa-mir-7-2	ctggatacagagtggaccggctggccccatcTGGAAGACTAGTGATTTTGTTGTTgtcttactgcgctcaaCAACAAATCCCAGTCTACCTAAtggtgccagccatcgca	hsa-miR-7-5p	TGGAAGACTAGTGATTTTGTTGTT	5'	Yes	gp1a	(((....))).((((...(((((((.((((..((.(((((...((.((((((((((............))))))))))))..))))).))..)))).))))))).)))).	98	50.9	-45.5	41.3333	34.3333	21.6667	37.5542	29.0425	28.9229	middle
10	12	hsa-let-7c-5p	TGAGGTAGTAGGTTGTATGGTT	22	chr21	+	16539818	16539922	gaagctgtgtgcatccgggtTGAGGTAGTAGGTTGTATGGTTtagagttacaccctgggagttaactgtacaaccttctagctttccttggagcacacttgagcc	25	hsa-let-7c,ppy-let-7c,mml-let-7c,bta-let-7c,oar-let-7c,ptr-let-7c,ggo-let-7c,chi-let-7c,ppa-let-7c,cja-let-7c,nle-let-7c,oga-let-7c,mmr-let-7c,dma-let-7c,cfa-let-7c,cpo-let-7c,pal-let-7c,dno-let-7c-1,ocu-let-7c,mmu-let-7c-1,rno-let-7c-1,eca-let-7c,efu-let-7c,ssc-let-7c,cgr-let-7c-1,	hsa-let-7c	gcatccgggtTGAGGTAGTAGGTTGTATGGTTtagagttacaccctgggagttaaCTGTACAACCTTCTAGCTTTCCttggagc	hsa-let-7c-5p	TGAGGTAGTAGGTTGTATGGTT	5'	Yes	gp1a	...(((((((((.(((..(..(((.(((.((((((((..(((..((.(..(.....)..).)))))..)))))))).))).)))..)..)))))))))...))).	101	48.6	-43.4	448.167	527.833	127	407.19	446.494	169.533	high
11	13	hsa-let-7g-5p	TGAGGTAGTAGTTTGTACAGTT	22	chr3	-	52268249	52268386	gctccgtttccttttgcctgattccaggcTGAGGTAGTAGTTTGTACAGTTtgagggtctatgataccacccggtacaggagataactgtacaggccactgccttgccaggaacagcgcgccagctgccaagtggggc	26	hsa-let-7g,ppy-let-7g,mml-let-7g,ptr-let-7g,bta-let-7g,mdo-let-7g,oar-let-7g,ggo-let-7g,ppa-let-7g,nle-let-7g,dma-let-7g,cfa-let-7g,pal-let-7g,dno-let-7g,ocu-let-7g,tch-let-7g,cja-let-7g,oga-let-7g,mmr-let-7g,cpo-let-7g,mmu-let-7g,eca-let-7g,rno-let-7g,ssc-let-7g,chi-let-7g,cgr-let-7g,	hsa-let-7g	aggcTGAGGTAGTAGTTTGTACAGTTtgagggtctatgataccacccggtacaggagataaCTGTACAGGCCACTGCCTTGCca	hsa-let-7g-5p	TGAGGTAGTAGTTTGTACAGTT	5'	Yes	gp1a	(((((..........(((((.((((.(((.((((((((.(..(((((((((.....((((.((.((((....))))))..)))))))))))))..).))))))))))).))))))).))....(((....))))))))	104	55.1	-57.8	2832	2852	1824	2573.07	2412.5	2434.86	high
12	14	hsa-let-7b-5p	TGAGGTAGTAGGTTGTGTGGTT	22	chr22	+	46113655	46113800	gggccctcccgcagtgcaaggccgggcctggcggggTGAGGTAGTAGGTTGTGTGGTTtcagggcagtgatgttgcccctcggaagataactatacaacctactgccttccctgaggagcccagtgacacgaccccatgggagggc	22	hsa-let-7b,ptr-let-7b,ppy-let-7b,mml-let-7b,ggo-let-7b,ppa-let-7b,oga-let-7b,mmr-let-7b,dma-let-7b,sbo-let-7b,cja-let-7b,mmu-let-7b,bta-let-7b,mdo-let-7b,cfa-let-7b,rno-let-7b,cpo-let-7b,dno-let-7b,ocu-let-7b,chi-let-7b,cgr-let-7b,oar-let-7b,	hsa-let-7b	cggggTGAGGTAGTAGGTTGTGTGGTTtcagggcagtgatgttgcccctcggaagataaCTATACAACCTACTGCCTTCCCtg	hsa-let-7b-5p	TGAGGTAGTAGGTTGTGTGGTT	5'	Yes	gp1a	..(((((((((..(((....((.((((((..(((((.(((((((((((((((((((((...((((((.....)))))).((....)).)))))))))))))))))))))))))).)).)))).))..))).......)))))))))	144	62.3	-81.7	1415.67	1356.67	701.667	1286.23	1147.6	936.657	high
13	15	hsa-miR-7-5p	TGGAAGACTAGTGATTTTGTTGTT	24	chr9	-	83969745	83969888	tacagagcctgtagaaaatatagaagattcattggatgttggcctagttctgtgTGGAAGACTAGTGATTTTGTTGTTtttagataactaaatcgacaacaaatcacagtctgccatatggcacaggccatgcctctacaggac	27	hsa-mir-7-1,ppy-mir-7-1,ggo-mir-7-1,ppa-mir-7-1,lla-mir-7,ptr-mir-7-1,mml-mir-7-1,mne-mir-7-1,cja-mir-7,sla-mir-7,mmu-mir-7a-1,bta-mir-7-2,eca-mir-7-3,mdo-mir-7,cfa-mir-7-1,cpo-mir-7-1,ocu-mir-7a,tch-mir-7-4,tch-mir-7-3,efu-mir-7b,rno-mir-7a-1,ssc-mir-7-2,aja-mir-7,pal-mir-7b-1,dno-mir-7-1,chi-mir-7,sha-mir-7,	hsa-mir-7-1	ttggatgttggcctagttctgtgTGGAAGACTAGTGATTTTGTTGTTtttagataactaaatcgaCAACAAATCACAGTCTGCCATAtggcacaggccatgcctctacag	hsa-miR-7-5p	TGGAAGACTAGTGATTTTGTTGTT	5'	Yes	gp1a	.......((((((((.......((....))...((....((((((.((.(..(((((.(((((.((((.((((((((((((((....)))))..)))))))))))))))))).)))))..).))))))))..))))))))))..	101	40.3	-56.7	41.3333	34.3333	21.6667	37.5542	29.0425	28.9229	middle
14	16	hsa-let-7f-5p	TGAGGTAGTAGATTGTATAGTT	22	X	-	53557192	53557274	tgtgggaTGAGGTAGTAGATTGTATAGTTttagggtcataccccatcttggagataaCTATACAGTCTACTGTCTTTCCcacg	13	hsa-let-7f-2,ppy-let-7f-2,mml-let-7f-2,mmu-let-7f-2,bta-let-7f-2,rno-let-7f-2,ssc-let-7f-1,oar-let-7f,ptr-let-7f-2,mdo-let-7f-2,cpo-let-7f-2,dno-let-7f-2,ocu-let-7f-2,	hsa-let-7f-2	tgtgggaTGAGGTAGTAGATTGTATAGTTttagggtcataccccatcttggagataaCTATACAGTCTACTGTCTTTCCcacg	hsa-let-7f-5p	TGAGGTAGTAGATTGTATAGTT	5'	Yes	gp1a	.((((((.(((..((((((((((((((((...(((.....))).(((.....)))))))))))))))))))..))))))))).	81	42.2	-40.7	2265.5	2116	1346.5	2058.36	1789.92	1797.45	high
14	17	hsa-let-7f-2-3p_1ss22CT	CTATACAGTCTACTGTCTTTCT	22	X	-	53557192	53557274	tgtgggaTGAGGTAGTAGATTGTATAGTTttagggtcataccccatcttggagataaCTATACAGTCTACTGTCTTTCCcacg	13	hsa-let-7f-2,ppy-let-7f-2,mml-let-7f-2,mmu-let-7f-2,bta-let-7f-2,rno-let-7f-2,ssc-let-7f-1,oar-let-7f,ptr-let-7f-2,mdo-let-7f-2,cpo-let-7f-2,dno-let-7f-2,ocu-let-7f-2,	hsa-let-7f-2	tgtgggaTGAGGTAGTAGATTGTATAGTTttagggtcataccccatcttggagataaCTATACAGTCTACTGTCTTTCCcacg	hsa-let-7f-2-3p	CTATACAGTCTACTGTCTTTCC	3'	Diff	gp1a	.((((((.(((..((((((((((((((((...(((.....))).(((.....)))))))))))))))))))..))))))))).	81	42.2	-40.7	3.33333	0	2.66667	3.02856	0	3.55974	low
15	18	hsa-let-7a-5p	TGAGGTAGTAGGTTGTATAGTT	22	chr9	+	94175950	94176051	ttcactgtgggaTGAGGTAGTAGGTTGTATAGTTttagggtcacacccaccactgggagataaCTATACAATCTACTGTCTTTCCtaacgtgatagaaaagt	14	hsa-let-7a-1,ppy-let-7a-1,mml-let-7a-1,bta-let-7a-1,ptr-let-7a-1,mmu-let-7a-1,rno-let-7a-1,mdo-let-7a-1,ssc-let-7a-2,cpo-let-7a-1,dno-let-7a,ocu-let-7a-1,cgr-let-7a-1,oar-let-7a,	hsa-let-7a-1	tgggaTGAGGTAGTAGGTTGTATAGTTttagggtcacacccaccactgggagataaCTATACAATCTACTGTCTTTCcta	hsa-let-7a-5p	TGAGGTAGTAGGTTGTATAGTT	5'	Yes	gp1a	.((((..(((((.(((..((((((((((((((((...(((.....))).((....))....))))))))))))))))..))))))))..)))).........	92	41.2	-41.3	1820.95	1730.5	917.833	1654.46	1463.83	1225.22	high
15	19	hsa-let-7a-3p_R+1_2	CTATACAATCTACTGTCTTTCT	22	chr9	+	94175950	94176051	ttcactgtgggaTGAGGTAGTAGGTTGTATAGTTttagggtcacacccaccactgggagataaCTATACAATCTACTGTCTTTCCtaacgtgatagaaaagt	14	hsa-let-7a-1,ppy-let-7a-1,mml-let-7a-1,bta-let-7a-1,ptr-let-7a-1,mmu-let-7a-1,rno-let-7a-1,mdo-let-7a-1,ssc-let-7a-2,cpo-let-7a-1,dno-let-7a,ocu-let-7a-1,cgr-let-7a-1,oar-let-7a,	hsa-let-7a-1	tgggaTGAGGTAGTAGGTTGTATAGTTttagggtcacacccaccactgggagataaCTATACAATCTACTGTCTTTCcta	hsa-let-7a-3p	CTATACAATCTACTGTCTTTC	3'	Diff	gp1a	.((((..(((((.(((..((((((((((((((((...(((.....))).((....))....))))))))))))))))..))))))))..)))).........	92	41.2	-41.3	6.83333	9.5	5.16667	6.20855	8.03604	6.897	low
16	20	hsa-let-7a-5p	TGAGGTAGTAGGTTGTATAGTT	22	chr11	-	122146470	122146622	ttttccagccattgtgactgcatgctcccaggtTGAGGTAGTAGGTTGTATAGTTtagaattacatcaagggagataactgtacagcctcctagctttccttgggtcttgcactaaacaacatggtgagaacgatcatgattcctccaggcct	24	hsa-let-7a-2,ppy-let-7a-2,bta-let-7a-2,eca-let-7a,ptr-let-7a-2,ppa-let-7a-2,nle-let-7a-2,sbo-let-7a,cpo-let-7a-2,mml-let-7a-2,cja-let-7a-1,oga-let-7a-2,mmr-let-7a-2,dma-let-7a-2,mmu-let-7a-2,mdo-let-7a-2,cfa-let-7a-2,rno-let-7a-2,ssc-let-7a-1,pal-let-7a-2,dno-let-7c-2,ocu-let-7a-2,cgr-let-7a-2,sha-let-7a,	hsa-let-7a-2	aggtTGAGGTAGTAGGTTGTATAGTTtagaattacatcaagggagataaCTGTACAGCCTCCTAGCTTTCCt	hsa-let-7a-5p	TGAGGTAGTAGGTTGTATAGTT	5'	Yes	gp1a	.......(((.((((...((((....((((((..(((.(((.(((((((((((((.........(((......)))))))))))))))).))).)))..))))))...))))....))))((((((.......)))))).........)))..	109	45.1	-49.8	1820.95	1730.5	917.833	1654.46	1463.83	1225.22	high
17	21	hsa-miR-9-5p	TCTTTGGTTATCTAGCTGTATGA	23	chr1	-	156420341	156420429	cggggttggttgttaTCTTTGGTTATCTAGCTGTATGAgtggtgtggagtcttcataaagctagataaccgaaagtaaaaataacccca	16	hsa-mir-9-1,ppy-mir-9-1,mml-mir-9-1,mmu-mir-9-1,rno-mir-9a-1,ssc-mir-9-1,ptr-mir-9-1,cja-mir-9-1,eca-mir-9a,mdo-mir-9a-3,cfa-mir-9-1,dno-mir-9-1,ocu-mir-9-1,efu-mir-9-1,cpo-mir-9-1,tch-mir-9-3,	hsa-mir-9-1	cggggttggttgttaTCTTTGGTTATCTAGCTGTATGAgtggtgtggagtcttcATAAAGCTAGATAACCGAAAGTaaaaataacccca	hsa-miR-9-5p	TCTTTGGTTATCTAGCTGTATGA	5'	Yes	gp1a	.(((((((....(((..(((((((((((((((.((((((.((.......)))))))).)))))))))))))))..)))...))))))).	87	40.4	-41.7	18.6667	18	7	16.96	15.2262	9.34433	middle
18	22	hsa-miR-9-5p	TCTTTGGTTATCTAGCTGTATGA	23	chr5	-	88666853	88666939	ggaagcgagttgttaTCTTTGGTTATCTAGCTGTATGAgtgtattggtcttcataaagctagataaccgaaagtaaaaactccttca	23	hsa-mir-9-2,ptr-mir-9-2,ggo-mir-9,mml-mir-9-2,mne-mir-9,age-mir-9,lla-mir-9,bta-mir-9-2,rno-mir-9a-2,ssc-mir-9-2,ppy-mir-9-2,mdo-mir-9a-2,cja-mir-9-2,mmu-mir-9-2,eca-mir-9a-2,cfa-mir-9-2,cpo-mir-9-2,dno-mir-9-2,efu-mir-9-3,pal-mir-9-1,tch-mir-9-1,ocu-mir-9-2,cgr-mir-9,	hsa-mir-9-2	ggaagcgagttgttaTCTTTGGTTATCTAGCTGTATGAgtgtattggtcttcATAAAGCTAGATAACCGAAAGTaaaaactccttca	hsa-miR-9-5p	TCTTTGGTTATCTAGCTGTATGA	5'	Yes	gp1a	.((((.(((((.(((..(((((((((((((((.((((((..(....)..)))))).)))))))))))))))..))).))))))))).	85	36.8	-40.1	18.6667	18	7	16.96	15.2262	9.34433	middle
19	23	hsa-miR-9-5p	TCTTTGGTTATCTAGCTGTATGA	23	chr15	+	89368017	89368106	ggaggcccgtttctcTCTTTGGTTATCTAGCTGTATGAgtgccacagagccgtcataaagctagataaccgaaagtagaaatgattctca	15	hsa-mir-9-3,ppy-mir-9-3,mml-mir-9-3,mmu-mir-9-3,bta-mir-9-1,mdo-mir-9a-1,cfa-mir-9-3,pal-mir-9-2,tch-mir-9-2,efu-mir-9-2,rno-mir-9a-3,ssc-mir-9-3,cpo-mir-9-3,dno-mir-9-3,chi-mir-9,	hsa-mir-9-3	ggaggcccgtttctcTCTTTGGTTATCTAGCTGTATGAgtgccacagagccgtcATAAAGCTAGATAACCGAAAGTagaaatgattctca	hsa-miR-9-5p	TCTTTGGTTATCTAGCTGTATGA	5'	Yes	gp1a	.((((..(((((((((.(((((((((((((((.(((((..((......))..))))).))))))))))))))))).)))))))..)))).	88	44.4	-41.1	18.6667	18	7	16.96	15.2262	9.34433	middle
20	24	hsa-miR-10a-5p_R-1	TACCCTGTAGATCCGAATTTGT	22	chr17	-	48579838	48579952	aagaagatctgtctgtcttctgtataTACCCTGTAGATCCGAATTTGTgtaaggaattttgtggtcaCAAATTCGTATCTAGGGGAATatgtagttgacataaacactccgctct	28	hsa-mir-10a,ggo-mir-10a,ppa-mir-10a,ptr-mir-10a,ppy-mir-10a,mml-mir-10a,cja-mir-10a,nle-mir-10a,oga-mir-10a,mmr-mir-10a,dma-mir-10a,age-mir-10a,sla-mir-10a,sbo-mir-10a,cfa-mir-10a,pal-mir-10a,dno-mir-10a,ocu-mir-10a,mmu-mir-10a,rno-mir-10a,bta-mir-10a,oar-mir-10a,eca-mir-10a,mdo-mir-10a,ssc-mir-10a,cpo-mir-10a,chi-mir-10a,cgr-mir-10a,	hsa-mir-10a	gatctgtctgtcttctgtataTACCCTGTAGATCCGAATTTGTGtaaggaattttgtggtcaCAAATTCGTATCTAGGGGAATAtgtagttgacataaacactccgctct	hsa-miR-10a-5p	TACCCTGTAGATCCGAATTTGTG	5'	Diff	gp1a	.((..((..(((.((((..((..((((.((((.(((((.((((((((((................)))))))))).))))))))).))))..))..))))...))).))..))..	112	38.3	-32.5	1551	1909	688	1409.19	1614.82	918.414	high
20	25	hsa-miR-10a-3p_R-1	CAAATTCGTATCTAGGGGAAT	21	chr17	-	48579838	48579952	aagaagatctgtctgtcttctgtataTACCCTGTAGATCCGAATTTGTgtaaggaattttgtggtcaCAAATTCGTATCTAGGGGAATatgtagttgacataaacactccgctct	28	hsa-mir-10a,ggo-mir-10a,ppa-mir-10a,ptr-mir-10a,ppy-mir-10a,mml-mir-10a,cja-mir-10a,nle-mir-10a,oga-mir-10a,mmr-mir-10a,dma-mir-10a,age-mir-10a,sla-mir-10a,sbo-mir-10a,cfa-mir-10a,pal-mir-10a,dno-mir-10a,ocu-mir-10a,mmu-mir-10a,rno-mir-10a,bta-mir-10a,oar-mir-10a,eca-mir-10a,mdo-mir-10a,ssc-mir-10a,cpo-mir-10a,chi-mir-10a,cgr-mir-10a,	hsa-mir-10a	gatctgtctgtcttctgtataTACCCTGTAGATCCGAATTTGTGtaaggaattttgtggtcaCAAATTCGTATCTAGGGGAATAtgtagttgacataaacactccgctct	hsa-miR-10a-3p	CAAATTCGTATCTAGGGGAATA	3'	Diff	gp1a	.((..((..(((.((((..((..((((.((((.(((((.((((((((((................)))))))))).))))))))).))))..))..))))...))).))..))..	112	38.3	-32.5	5	12	6	4.54284	10.1508	8.00942	middle
21	26	hsa-miR-10b-5p_R-1	TACCCTGTAGAACCGAATTTGT	22	chr2	+	176150298	176150418	gggacccagaggttgtaacgttgtctatataTACCCTGTAGAACCGAATTTGTgtggtatccgtatagtcacagattcgattctaggggaatatatggtcgatgcaaaaacttcacgtttc	30	hsa-mir-10b,ppa-mir-10b,ptr-mir-10b,ppy-mir-10b,mml-mir-10b,ggo-mir-10b,cja-mir-10b,nle-mir-10b,oga-mir-10,mmr-mir-10,mne-mir-10b,dma-mir-10,cpo-mir-10b,sbo-mir-10b,mmu-mir-10b,bta-mir-10b,eca-mir-10b,mdo-mir-10b,cfa-mir-10b,efu-mir-10,ssc-mir-10b,rno-mir-10b,pal-mir-10b,dno-mir-10b,ocu-mir-10b,chi-mir-10b,cgr-mir-10b,tch-mir-10b-1,tch-mir-10b-2,oar-mir-10b,	hsa-mir-10b	ccagaggttgtaacgttgtctatataTACCCTGTAGAACCGAATTTGTGtggtatccgtatagtcACAGATTCGATTCTAGGGGAATatatggtcgatgcaaaaacttca	hsa-miR-10b-5p	TACCCTGTAGAACCGAATTTGTG	5'	Diff	gp1a	(..((...((((((....(((((.((((((((.((((.(((((.((((((((((..(((....)))...)))))))))).))))))))).)))))))).)))))....))))))..))..)	121	42.1	-46.5	826	841	371	750.478	711.401	495.249	high
22	27	hsa-miR-15a-5p_R-1	TAGCAGCACATAATGGTTTGT	21	chr13	-	50049108	50049202	accttggagtaaagTAGCAGCACATAATGGTTTGTggattttgaaaaggtgcaggccatattgtgctgcctcaaaaatacaaggatctgatcttc	28	hsa-mir-15a,ptr-mir-15a,ppy-mir-15a,ggo-mir-15a,ppa-mir-15a,mml-mir-15a,mne-mir-15a,age-mir-15a,lla-mir-15a,sla-mir-15a,lca-mir-15a,bta-mir-15a,nle-mir-15a,oga-mir-15a,mmr-mir-15a,cfa-mir-15a,dno-mir-15a,tch-mir-15a,mmu-mir-15a,eca-mir-15a,mdo-mir-15a,rno-mir-15a,ssc-mir-15a,cpo-mir-15a,pal-mir-15a,ocu-mir-15a,chi-mir-15a,cgr-mir-15a,	hsa-mir-15a	ccttggagtaaagTAGCAGCACATAATGGTTTGTGgattttgaaaaggtgCAGGCCATATTGTGCTGCCTCAaaaatacaagg	hsa-miR-15a-5p	TAGCAGCACATAATGGTTTGTG	5'	Diff	gp1a	.(((((..........((((((((..((((..(((...............)))..))))..))))))))..........)))))...........	53	41.1	-29.4	102	81	52	92.674	68.5178	69.415	middle
23	28	hsa-miR-15b-5p	TAGCAGCACATCATGGTTTACA	22	chr3	+	160404588	160404685	ttgaggccttaaagtactgTAGCAGCACATCATGGTTTACAtgctacagtcaagatgCGAATCATTATTTGCTGCTCTagaaatttaaggaaattcat	24	hsa-mir-15b,ptr-mir-15b,ppy-mir-15b,ggo-mir-15b,ppa-mir-15b,mml-mir-15b,mne-mir-15b,age-mir-15b,lla-mir-15b,chi-mir-15b,cja-mir-15b,nle-mir-15b,oga-mir-15b,mmu-mir-15b,eca-mir-15b,bta-mir-15b,cfa-mir-15b,tch-mir-15b,efu-mir-15,rno-mir-15b,ssc-mir-15b,pal-mir-15b,dno-mir-15b,cgr-mir-15b,	hsa-mir-15b	ttgaggccttaaagtactgTAGCAGCACATCATGGTTTACAtgctacagtcaagatgCGAATCATTATTTGCTGCTCTAgaaatttaaggaaattcat	hsa-miR-15b-5p	TAGCAGCACATCATGGTTTACA	5'	Yes	gp1a	.(((..(((((((...((..(((((((.((.((((((..(((.((.......)))))..)))))).)).)))))))..))...)))))))....))).	96	36.7	-29.5	149	143	100	135.377	120.964	133.49	middle
23	29	hsa-miR-15b-3p_R-1	CGAATCATTATTTGCTGCTCT	21	chr3	+	160404588	160404685	ttgaggccttaaagtactgTAGCAGCACATCATGGTTTACAtgctacagtcaagatgCGAATCATTATTTGCTGCTCTagaaatttaaggaaattcat	24	hsa-mir-15b,ptr-mir-15b,ppy-mir-15b,ggo-mir-15b,ppa-mir-15b,mml-mir-15b,mne-mir-15b,age-mir-15b,lla-mir-15b,chi-mir-15b,cja-mir-15b,nle-mir-15b,oga-mir-15b,mmu-mir-15b,eca-mir-15b,bta-mir-15b,cfa-mir-15b,tch-mir-15b,efu-mir-15,rno-mir-15b,ssc-mir-15b,pal-mir-15b,dno-mir-15b,cgr-mir-15b,	hsa-mir-15b	ttgaggccttaaagtactgTAGCAGCACATCATGGTTTACAtgctacagtcaagatgCGAATCATTATTTGCTGCTCTAgaaatttaaggaaattcat	hsa-miR-15b-3p	CGAATCATTATTTGCTGCTCTA	3'	Diff	gp1a	.(((..(((((((...((..(((((((.((.((((((..(((.((.......)))))..)))))).)).)))))))..))...)))))))....))).	96	36.7	-29.5	30	21	12	27.2571	17.7639	16.0188	middle
24	30	hsa-miR-16-5p	TAGCAGCACGTAAATATTGGCG	22	chr13	-	50048973	50049063	atgtcagcagtgcctTAGCAGCACGTAAATATTGGCGttaagattctaaaattatctccagtattaactgtgctgctgaagtaaggttgac	28	hsa-mir-16-1,ptr-mir-16-1,ppy-mir-16-1,ggo-mir-16,ppa-mir-16,mml-mir-16-1,cja-mir-16-1,mne-mir-16,age-mir-16,sla-mir-16,nle-mir-16-1,oga-mir-16-1,dma-mir-16,sbo-mir-16-1,cfa-mir-16-1,lla-mir-16,lca-mir-16,mmu-mir-16-1,bta-mir-16a,eca-mir-16-2,mdo-mir-16-1,efu-mir-16-1,ssc-mir-16-2,cpo-mir-16a,dno-mir-16a,pal-mir-16-1,chi-mir-16a,cgr-mir-16,	hsa-mir-16-1	gtcagcagtgcctTAGCAGCACGTAAATATTGGCGttaagattctaaaattatctCCAGTATTAACTGTGCTGCTGAagtaaggttgac	hsa-miR-16-5p	TAGCAGCACGTAAATATTGGCG	5'	Yes	gp1a	..((((((..(((.((((((((((((.((((((((.....((((.........)))))))))))).)).)))))))))).)))..))))))	89	39.6	-37.4	138	115	80.5	125.382	97.2784	107.46	middle
25	31	hsa-miR-16-5p	TAGCAGCACGTAAATATTGGCG	22	chr3	+	160404738	160404832	catacttgttccactcTAGCAGCACGTAAATATTGGCGtagtgaaatatatattaaacACCAATATTACTGTGCTGCTTTagtgtgacagggata	20	hsa-mir-16-2,ptr-mir-16-2,ppy-mir-16-2,mml-mir-16-2,cja-mir-16-2,nle-mir-16-2,oga-mir-16-2,cpo-mir-16b,pal-mir-16-2,ocu-mir-16b,sbo-mir-16-2,mmu-mir-16-2,eca-mir-16-1,mdo-mir-16-2,cfa-mir-16-2,efu-mir-16-2,rno-mir-16,ssc-mir-16-1,dno-mir-16b,cgr-mir-16-2,	hsa-mir-16-2	gttccactcTAGCAGCACGTAAATATTGGCGtagtgaaatatatattaaacaCCAATATTACTGTGCTGCTTTAgtgtgac	hsa-miR-16-5p	TAGCAGCACGTAAATATTGGCG	5'	Yes	gp1a	....(((((..((((..(((((((((..((((((((.((..(((........))).)).))))))))..)))))))))..))))..)))))....	87	36.8	-37.2	138	115	80.5	125.382	97.2784	107.46	middle
25	32	hsa-miR-16-2-3p_L+1R-1	ACCAATATTACTGTGCTGCTTT	22	chr3	+	160404738	160404832	catacttgttccactcTAGCAGCACGTAAATATTGGCGtagtgaaatatatattaaacACCAATATTACTGTGCTGCTTTagtgtgacagggata	20	hsa-mir-16-2,ptr-mir-16-2,ppy-mir-16-2,mml-mir-16-2,cja-mir-16-2,nle-mir-16-2,oga-mir-16-2,cpo-mir-16b,pal-mir-16-2,ocu-mir-16b,sbo-mir-16-2,mmu-mir-16-2,eca-mir-16-1,mdo-mir-16-2,cfa-mir-16-2,efu-mir-16-2,rno-mir-16,ssc-mir-16-1,dno-mir-16b,cgr-mir-16-2,	hsa-mir-16-2	gttccactcTAGCAGCACGTAAATATTGGCGtagtgaaatatatattaaacaCCAATATTACTGTGCTGCTTTAgtgtgac	hsa-miR-16-2-3p	CCAATATTACTGTGCTGCTTTA	3'	Diff	gp1a	....(((((..((((..(((((((((..((((((((.((..(((........))).)).))))))))..)))))))))..))))..)))))....	87	36.8	-37.2	14	31	18	12.72	26.2229	24.0283	middle
26	33	hsa-miR-17-5p	CAAAGTGCTTACAGTGCAGGTAG	23	chr13	+	91350605	91350689	gtcagaataatgtCAAAGTGCTTACAGTGCAGGTAGtgatatgtgcatctACTGCAGTGAAGGCACTTGTAGcattatggtgaca	31	hsa-mir-17,ptr-mir-17,ggo-mir-17,ppa-mir-17,mml-mir-17,mne-mir-17,age-mir-17,lla-mir-17,sla-mir-17,lca-mir-17,bta-mir-17,ppy-mir-17,cja-mir-17,nle-mir-17,oga-mir-17,pal-mir-17,tch-mir-17,mmr-mir-17,mmu-mir-17,eca-mir-17,mdo-mir-17,cfa-mir-17,cpo-mir-17,dno-mir-17,ocu-mir-17,efu-mir-17,rno-mir-17-1,ssc-mir-17,chi-mir-17,oar-mir-17,cgr-mir-17,	hsa-mir-17	gtcagaataatgtCAAAGTGCTTACAGTGCAGGTAGtgatatgtgcatctACTGCAGTGAAGGCACTTGTAGcattatggtgac	hsa-miR-17-5p	CAAAGTGCTTACAGTGCAGGTAG	5'	Yes	gp1a	((((..(((((((..((((((((.((.(((((.(((((.......)).)))))))).)).))))))))...)))))))..)))).	84	42.4	-36	155	125.5	82.5	140.828	106.16	110.13	middle
26	34	hsa-miR-17-3p	ACTGCAGTGAAGGCACTTGTAG	22	chr13	+	91350605	91350689	gtcagaataatgtCAAAGTGCTTACAGTGCAGGTAGtgatatgtgcatctACTGCAGTGAAGGCACTTGTAGcattatggtgaca	31	hsa-mir-17,ptr-mir-17,ggo-mir-17,ppa-mir-17,mml-mir-17,mne-mir-17,age-mir-17,lla-mir-17,sla-mir-17,lca-mir-17,bta-mir-17,ppy-mir-17,cja-mir-17,nle-mir-17,oga-mir-17,pal-mir-17,tch-mir-17,mmr-mir-17,mmu-mir-17,eca-mir-17,mdo-mir-17,cfa-mir-17,cpo-mir-17,dno-mir-17,ocu-mir-17,efu-mir-17,rno-mir-17-1,ssc-mir-17,chi-mir-17,oar-mir-17,cgr-mir-17,	hsa-mir-17	gtcagaataatgtCAAAGTGCTTACAGTGCAGGTAGtgatatgtgcatctACTGCAGTGAAGGCACTTGTAGcattatggtgac	hsa-miR-17-3p	ACTGCAGTGAAGGCACTTGTAG	3'	Yes	gp1a	((((..(((((((..((((((((.((.(((((.(((((.......)).)))))))).)).))))))))...)))))))..)))).	84	42.4	-36	0	5	6	0	4.2295	8.00942	low
27	35	hsa-miR-18a-5p	TAAGGTGCATCTAGTGCAGATAG	23	chr13	+	91350740	91350834	tgagtgctttttgttcTAAGGTGCATCTAGTGCAGATAGtgaagtagattagcatctactgccctaagtgctccttctggcataagaagttatgt	27	hsa-mir-18a,ptr-mir-18a,ppy-mir-18a,ggo-mir-18a,ppa-mir-18,mml-mir-18a,mne-mir-18,age-mir-18,lla-mir-18,sla-mir-18,lca-mir-18,bta-mir-18a,oga-mir-18,eca-mir-18a,mmr-mir-18,mmu-mir-18a,rno-mir-18a,mdo-mir-18a,cfa-mir-18a,ssc-mir-18a,efu-mir-18,cpo-mir-18a,dno-mir-18a,ocu-mir-18a,pal-mir-18a,chi-mir-18a,cgr-mir-18a,	hsa-mir-18a	tgttcTAAGGTGCATCTAGTGCAGATAGtgaagtagattagcatctACTGCCCTAAGTGCTCCTTCTGGca	hsa-miR-18a-5p	TAAGGTGCATCTAGTGCAGATAG	5'	Yes	gp1a	.....(((((((((.((((((.(((..(((.((((.(((....((......))..))))))).)))..))).)))..))).))))))))).....	85	41.1	-27.5	17	0	13	15.4457	0	17.3537	middle
28	36	hsa-miR-19b-3p	TGTGCAAATCCATGCAAAACTGA	23	X	-	134169669	134169769	aagacattgctacttacaattagttttgcaggtttgcatttcagcgtatatatgtatatgtggcTGTGCAAATCCATGCAAAACTGAttgtgataatgtgt	28	hsa-mir-19b-2,ppy-mir-19b-2,ggo-mir-19b-2,ppa-mir-19b-2,mml-mir-19b-2,mne-mir-19b-2,ptr-mir-19b-2,cja-mir-19b-2,nle-mir-19b,oga-mir-19b-2,mmr-mir-19b-2,dma-mir-19b-2,age-mir-19b-2,lla-mir-19b-2,sla-mir-19b-2,lca-mir-19b-2,mmu-mir-19b-2,bta-mir-19b-2,eca-mir-19b-2,cfa-mir-19b-2,efu-mir-19,rno-mir-19b-2,ssc-mir-19b-2,cpo-mir-19b-2,pal-mir-19-1,dno-mir-19b-2,ocu-mir-19b-2,tch-mir-19b-2,	hsa-mir-19b-2	acattgctacttacaattAGTTTTGCAGGTTTGCATTTCAgcgtatatatgtatatgtggcTGTGCAAATCCATGCAAAACTGAttgtgataatgt	hsa-miR-19b-3p	TGTGCAAATCCATGCAAAACTGA	3'	Yes	gp1a	...((((((....((((((((((((((((((((((((((....(((((((....)))))))....))))))).)).)))))))))))))))))))))))..	96	34.7	-41.8	81	97	57	73.5941	82.0522	76.0895	middle
29	37	hsa-miR-19b-3p	TGTGCAAATCCATGCAAAACTGA	23	chr13	+	91351186	91351284	actgaacactgttctatggttagttttgcaggtttgcatccagctgtgtgatattctgcTGTGCAAATCCATGCAAAACTGActgtggtagtgaaaagt	30	hsa-mir-19b-1,ptr-mir-19b-1,ppy-mir-19b-1,ggo-mir-19b-1,ppa-mir-19b-1,mml-mir-19b-1,mne-mir-19b-1,age-mir-19b-1,lla-mir-19b-1,sla-mir-19b-1,bta-mir-19b,chi-mir-19b,oar-mir-19b,cja-mir-19b-1,oga-mir-19b-1,mmr-mir-19b-1,dma-mir-19b-1,cfa-mir-19b-1,lca-mir-19b-1,mmu-mir-19b-1,rno-mir-19b-1,eca-mir-19b,mdo-mir-19b-1,ssc-mir-19b-1,cpo-mir-19b-1,pal-mir-19-2,dno-mir-19b-1,ocu-mir-19b-1,tch-mir-19b-1,cg…	hsa-mir-19b-1	cactgttctatggttAGTTTTGCAGGTTTGCATCCAGCtgtgtgatattctgcTGTGCAAATCCATGCAAAACTGActgtggtagtg	hsa-miR-19b-3p	TGTGCAAATCCATGCAAAACTGA	3'	Yes	gp1a	(((...(((((..(((..((((((((((((((((((((..((((.............)))))))))).)).))))))))))))..))))))))...)))	99	41.4	-40.5	81	97	57	73.5941	82.0522	76.0895	middle
30	38	hsa-miR-19a-3p	TGTGCAAATCTATGCAAAACTGA	23	chr13	+	91350891	91350972	gcagtcctctgttagttttgcatagttgcactacaagaagaatgtagtTGTGCAAATCTATGCAAAACTGAtggtggcctgc	27	hsa-mir-19a,ptr-mir-19a,ppy-mir-19a,ggo-mir-19a,ppa-mir-19a,mml-mir-19a,sla-mir-19a,lca-mir-19a,bta-mir-19a,ssc-mir-19a,chi-mir-19a,cja-mir-19a,nle-mir-19a,cfa-mir-19a,cpo-mir-19a,dno-mir-19a,ocu-mir-19a,oga-mir-19a,mne-mir-19a,age-mir-19a,lla-mir-19a,mmu-mir-19a,eca-mir-19a,mdo-mir-19a,rno-mir-19a,cgr-mir-19a,tch-mir-19a,	hsa-mir-19a	gcagtcctctgttAGTTTTGCATAGTTGCACTACAagaagaatgtagtTGTGCAAATCTATGCAAAACTGAtggtggcctgc	hsa-miR-19a-3p	TGTGCAAATCTATGCAAAACTGA	3'	Yes	gp1a	((((.((.(..((((((((((((((((((((((((.......))))...))))))..))))))))))))))..).)).))))	82	42.7	-39	52	44	39	47.2456	37.2196	52.0612	middle
31	39	hsa-miR-20a-5p	TAAAGTGCTTATAGTGCAGGTAG	23	chr13	+	91351048	91351152	ctgatgtgacagcttctgtagcacTAAAGTGCTTATAGTGCAGGTAGtgtttagttatctactgcattatgagcacttaaagtactgctagctgtagaactccag	28	hsa-mir-20a,ptr-mir-20a,ppy-mir-20a,ggo-mir-20a,ppa-mir-20,mml-mir-20a,mne-mir-20,age-mir-20,lla-mir-20,sla-mir-20,bta-mir-20a,eca-mir-20a,ssc-mir-20a,cja-mir-20a,nle-mir-20,pal-mir-20a,dno-mir-20a,ocu-mir-20a,tch-mir-20a,mmr-mir-20,lca-mir-20,mmu-mir-20a,mdo-mir-20a,cfa-mir-20a,efu-mir-20,rno-mir-20a,cpo-mir-20a,chi-mir-20a,	hsa-mir-20a	gtagcacTAAAGTGCTTATAGTGCAGGTAGtgtttagttatctACTGCATTATGAGCACTTAAAGtactgc	hsa-miR-20a-5p	TAAAGTGCTTATAGTGCAGGTAG	5'	Yes	gp1a	(((..((.((((((...((((.(((.(((((((((((((((((.(((((......)).))))))))))))))))))))..))).)))).))))))...))..)))	105	41	-41.5	240	332	280	218.057	280.838	373.773	high
32	40	hsa-miR-20b-5p_R+1	CAAAGTGCTCATAGTGCAGGTAGA	24	X	-	134169780	134169897	ggataagattgggtcctagtagtacCAAAGTGCTCATAGTGCAGGTAGTtttggcatgactctactgtagtatgggcacttccagtactcttggataacaaatctcttgttgatggag	14	hsa-mir-20b,ppy-mir-20b,ptr-mir-20b,ggo-mir-20b,mml-mir-20b,cja-mir-20b,mmu-mir-20b,eca-mir-20b,cpo-mir-20b,mdo-mir-20b,pal-mir-20b,dno-mir-20b,ocu-mir-20b,cgr-mir-20b,	hsa-mir-20b	agtacCAAAGTGCTCATAGTGCAGGTAGttttggcatgactctACTGTAGTATGGGCACTTCCAGtact	hsa-miR-20b-5p	CAAAGTGCTCATAGTGCAGGTAG	5'	Diff	gp1a	.((((((((((.((((.((.(((((..(((((((((((.(((((..((((.......))))...))))).)))))))))))...))))))).))))..)))...))))))).......	110	43.2	-42.7	0	8	0	0	6.76719	0	low
33	41	hsa-miR-21-5p_R+1	TAGCTTATCAGACTGATGTTGAC	23	chr17	+	59841256	59841347	tgtaccaccttgtcgggTAGCTTATCAGACTGATGTTGACtgttgaatctcatggCAACACCAGTCGATGGGCTGTctgacattttggtatc	31	hsa-mir-21,ptr-mir-21,ppy-mir-21,ggo-mir-21,ppa-mir-21,mml-mir-21,mne-mir-21,age-mir-21,cja-mir-21,nle-mir-21,oga-mir-21,mmr-mir-21,dma-mir-21,sbo-mir-21,cfa-mir-21,cpo-mir-21,dno-mir-21,ocu-mir-21,tch-mir-21,mmu-mir-21a,bta-mir-21,eca-mir-21,oar-mir-21,mdo-mir-21,efu-mir-21,rno-mir-21,ssc-mir-21,chi-mir-21,cgr-mir-21,pal-mir-21,aja-mir-21,	hsa-mir-21	tgtcgggTAGCTTATCAGACTGATGTTGActgttgaatctcatggCAACACCAGTCGATGGGCTGTctgaca	hsa-miR-21-5p	TAGCTTATCAGACTGATGTTGA	5'	Diff	gp1a	.((((((...((((((..(((..(((.(((((.(((((.(..(.(.....))..)))))).))))))))..)))..))))))...)))))).	90	46.7	-42.3	16072	15218	11277	14602.5	12872.9	15053.7	high
33	42	hsa-miR-21-3p	CAACACCAGTCGATGGGCTGT	21	chr17	+	59841256	59841347	tgtaccaccttgtcgggTAGCTTATCAGACTGATGTTGACtgttgaatctcatggCAACACCAGTCGATGGGCTGTctgacattttggtatc	31	hsa-mir-21,ptr-mir-21,ppy-mir-21,ggo-mir-21,ppa-mir-21,mml-mir-21,mne-mir-21,age-mir-21,cja-mir-21,nle-mir-21,oga-mir-21,mmr-mir-21,dma-mir-21,sbo-mir-21,cfa-mir-21,cpo-mir-21,dno-mir-21,ocu-mir-21,tch-mir-21,mmu-mir-21a,bta-mir-21,eca-mir-21,oar-mir-21,mdo-mir-21,efu-mir-21,rno-mir-21,ssc-mir-21,chi-mir-21,cgr-mir-21,pal-mir-21,aja-mir-21,	hsa-mir-21	tgtcgggTAGCTTATCAGACTGATGTTGActgttgaatctcatggCAACACCAGTCGATGGGCTGTctgaca	hsa-miR-21-3p	CAACACCAGTCGATGGGCTGT	3'	Yes	gp1a	.((((((...((((((..(((..(((.(((((.(((((.(..(.(.....))..)))))).))))))))..)))..))))))...)))))).	90	46.7	-42.3	26	20	37	23.6228	16.918	49.3914	middle
34	43	hsa-miR-22-5p	AGTTCTTCAGTGGCAAGCTTTA	22	chr17	-	1713895	1714005	cctctcacgccctcacctggctgagccgcagtAGTTCTTCAGTGGCAAGCTTTAtgtcctgacccagctaAAGCTGCCAGTTGAAGAACTGTtgccctctgcccctggctt	33	hsa-mir-22,ptr-mir-22,ppy-mir-22,ppa-mir-22,mml-mir-22,mne-mir-22,age-mir-22,lla-mir-22,lca-mir-22,bta-mir-22,eca-mir-22,oar-mir-22,ggo-mir-22,cja-mir-22,sbo-mir-22,nle-mir-22,oga-mir-22,mmr-mir-22,dma-mir-22,cfa-mir-22,cpo-mir-22,pal-mir-22,dno-mir-22,ocu-mir-22,tch-mir-22,sla-mir-22,mmu-mir-22,aja-mir-22,efu-mir-22,rno-mir-22,ssc-mir-22,chi-mir-22,cgr-mir-22,	hsa-mir-22	ggctgagccgcagtAGTTCTTCAGTGGCAAGCTTTAtgtcctgacccagctaAAGCTGCCAGTTGAAGAACTGTtgccctctgcc	hsa-miR-22-5p	AGTTCTTCAGTGGCAAGCTTTA	5'	Yes	gp1a	........(((.......(((.(((..(((..(((((((((((((((.((((((.((.........))))))))))))).))))))))))..))).))).)))...)))..	101	56.8	-43.3	16	32	13	14.5371	27.0688	17.3537	middle
34	44	hsa-miR-22-3p	AAGCTGCCAGTTGAAGAACTGT	22	chr17	-	1713895	1714005	cctctcacgccctcacctggctgagccgcagtAGTTCTTCAGTGGCAAGCTTTAtgtcctgacccagctaAAGCTGCCAGTTGAAGAACTGTtgccctctgcccctggctt	33	hsa-mir-22,ptr-mir-22,ppy-mir-22,ppa-mir-22,mml-mir-22,mne-mir-22,age-mir-22,lla-mir-22,lca-mir-22,bta-mir-22,eca-mir-22,oar-mir-22,ggo-mir-22,cja-mir-22,sbo-mir-22,nle-mir-22,oga-mir-22,mmr-mir-22,dma-mir-22,cfa-mir-22,cpo-mir-22,pal-mir-22,dno-mir-22,ocu-mir-22,tch-mir-22,sla-mir-22,mmu-mir-22,aja-mir-22,efu-mir-22,rno-mir-22,ssc-mir-22,chi-mir-22,cgr-mir-22,	hsa-mir-22	ggctgagccgcagtAGTTCTTCAGTGGCAAGCTTTAtgtcctgacccagctaAAGCTGCCAGTTGAAGAACTGTtgccctctgcc	hsa-miR-22-3p	AAGCTGCCAGTTGAAGAACTGT	3'	Yes	gp1a	........(((.......(((.(((..(((..(((((((((((((((.((((((.((.........))))))))))))).))))))))))..))).))).)))...)))..	101	56.8	-43.3	942	1365	733	855.872	1154.65	978.484	high
35	45	hsa-miR-23a-5p	GGGGTTCCTGGGGATGGGATTT	22	chr19	-	13836582	13836660	cggccggctGGGGTTCCTGGGGATGGGATTTgcttcctgtcacaaATCACATTGCCAGGGATTTCCAaccgaccctgag	26	hsa-mir-23a,ptr-mir-23a,ppy-mir-23a,ggo-mir-23a,ppa-mir-23a,mml-mir-23a,mne-mir-23a,cja-mir-23a,oga-mir-23a,age-mir-23a,sla-mir-23a,lca-mir-23a,mmu-mir-23a,bta-mir-23a,oar-mir-23a,eca-mir-23a,mdo-mir-23a,cfa-mir-23a,efu-mir-23a,rno-mir-23a,ssc-mir-23a,cpo-mir-23a,pal-mir-23a,dno-mir-23a,chi-mir-23a,cgr-mir-23a,	hsa-mir-23a	ggccggctGGGGTTCCTGGGGATGGGATTTgcttcctgtcacaaATCACATTGCCAGGGATTTCCaaccgacc	hsa-miR-23a-5p	GGGGTTCCTGGGGATGGGATTT	5'	Yes	gp1a	.((.(((..(..((((((((..(((.((((((..........)))))).)))..))))))))..)...))).)).....	73	58.2	-30.7	5	8	7	4.54284	6.76719	9.34433	low
35	46	hsa-miR-23a-3p_R+1	ATCACATTGCCAGGGATTTCCA	22	chr19	-	13836582	13836660	cggccggctGGGGTTCCTGGGGATGGGATTTgcttcctgtcacaaATCACATTGCCAGGGATTTCCAaccgaccctgag	26	hsa-mir-23a,ptr-mir-23a,ppy-mir-23a,ggo-mir-23a,ppa-mir-23a,mml-mir-23a,mne-mir-23a,cja-mir-23a,oga-mir-23a,age-mir-23a,sla-mir-23a,lca-mir-23a,mmu-mir-23a,bta-mir-23a,oar-mir-23a,eca-mir-23a,mdo-mir-23a,cfa-mir-23a,efu-mir-23a,rno-mir-23a,ssc-mir-23a,cpo-mir-23a,pal-mir-23a,dno-mir-23a,chi-mir-23a,cgr-mir-23a,	hsa-mir-23a	ggccggctGGGGTTCCTGGGGATGGGATTTgcttcctgtcacaaATCACATTGCCAGGGATTTCCaaccgacc	hsa-miR-23a-3p	ATCACATTGCCAGGGATTTCC	3'	Diff	gp1a	.((.(((..(..((((((((..(((.((((((..........)))))).)))..))))))))..)...))).)).....	73	58.2	-30.7	822	908.5	501.5	746.844	768.499	669.454	high
36	47	hsa-miR-23b-5p_L-1	GGGTTCCTGGCATGCTGATTT	21	chr9	+	95085199	95085304	ggcgctgctctcaggtgctctggctgcttGGGTTCCTGGCATGCTGATTTgtgacttaagattaaaATCACATTGCCAGGGATTACCACGcaaccacgaccttggc	28	hsa-mir-23b,ptr-mir-23b,ppy-mir-23b,ppa-mir-23b,mml-mir-23b,ggo-mir-23b,cja-mir-23b,nle-mir-23b,dma-mir-23b,oga-mir-23b,mmr-mir-23b,mmu-mir-23b,bta-mir-10174,bta-mir-23b,cpo-mir-23b,dno-mir-23b,ocu-mir-23b,oar-mir-23b,eca-mir-23b,mdo-mir-23b,cfa-mir-23b,efu-mir-23b,rno-mir-23b,ssc-mir-23b,pal-mir-23b,chi-mir-23b,cgr-mir-23b,tch-mir-23b,	hsa-mir-23b	ctcaggtgctctggctgctTGGGTTCCTGGCATGCTGATTTgtgacttaagattaaaATCACATTGCCAGGGATTACCACgcaaccacgaccttggc	hsa-miR-23b-5p	TGGGTTCCTGGCATGCTGATTT	5'	Diff	gp1a	((((((.......)))))).(((.(((.(((((((((((((((.((((((..............)))))))).))))))))))..))).))).)))..........	76	52.8	-37.1	0	0	6	0	0	8.00942	low
36	48	hsa-miR-23b-3p_R+1	ATCACATTGCCAGGGATTACCACT	24	chr9	+	95085199	95085304	ggcgctgctctcaggtgctctggctgcttGGGTTCCTGGCATGCTGATTTgtgacttaagattaaaATCACATTGCCAGGGATTACCACGcaaccacgaccttggc	28	hsa-mir-23b,ptr-mir-23b,ppy-mir-23b,ppa-mir-23b,mml-mir-23b,ggo-mir-23b,cja-mir-23b,nle-mir-23b,dma-mir-23b,oga-mir-23b,mmr-mir-23b,mmu-mir-23b,bta-mir-10174,bta-mir-23b,cpo-mir-23b,dno-mir-23b,ocu-mir-23b,oar-mir-23b,eca-mir-23b,mdo-mir-23b,cfa-mir-23b,efu-mir-23b,rno-mir-23b,ssc-mir-23b,pal-mir-23b,chi-mir-23b,cgr-mir-23b,tch-mir-23b,	hsa-mir-23b	ctcaggtgctctggctgctTGGGTTCCTGGCATGCTGATTTgtgacttaagattaaaATCACATTGCCAGGGATTACCACgcaaccacgaccttggc	hsa-miR-23b-3p	ATCACATTGCCAGGGATTACCAC	3'	Diff	gp1a	((((((.......)))))).(((.(((.(((((((((((((((.((((((..............)))))))).))))))))))..))).))).)))..........	76	52.8	-37.1	202	235.5	151.5	183.531	199.209	202.238	middle
37	49	hsa-miR-24-3p_R-2	TGGCTCAGTTCAGCAGGAAC	20	chr9	+	95086013	95086092	gacccgccctccggtgcctactgagctgatatcagttctcattttacacacTGGCTCAGTTCAGCAGGAACaggagtcga	23	hsa-mir-24-1,ppy-mir-24-1,ppa-mir-24-1,mml-mir-24-1,cja-mir-24-2,mne-mir-24-1,bta-mir-24-1,eca-mir-24-2,ptr-mir-24-1,nle-mir-24-1,mmr-mir-24,dma-mir-24,oga-mir-24-1,sbo-mir-24-2,mmu-mir-24-1,rno-mir-24-1,cgr-mir-24-1,cfa-mir-24-1,ssc-mir-24-2,chi-mir-24,cpo-mir-24-1,dno-mir-24a,ocu-mir-24-1,	hsa-mir-24-1	ctccggTGCCTACTGAGCTGATATCAGTtctcattttacacacTGGCTCAGTTCAGCAGGAACAGgag	hsa-miR-24-3p	TGGCTCAGTTCAGCAGGAACAG	3'	Diff	gp1a	....((..((((.((.(((.(((((((((..(((((.............))))).))))))))).))).)).)))).)).	75	53.8	-28	155	217.5	141	140.828	183.983	188.221	middle
38	50	hsa-miR-24-2-5p_L+1	GTGCCTACTGAGCTGAAACACAG	23	chr19	-	13836268	13836371	ggcctccctgggctctgcctcccGTGCCTACTGAGCTGAAACACAGttggtttgtgtacacTGGCTCAGTTCAGCAGGAACaggggtcaagcccccttggagcc	20	hsa-mir-24-2,ptr-mir-24-2,ppy-mir-24-2,ggo-mir-24,ppa-mir-24-2,mml-mir-24-2,mne-mir-24-2,cja-mir-24-1,nle-mir-24-2,oga-mir-24-2,sbo-mir-24-1,bta-mir-24-2,eca-mir-24-1,mdo-mir-24-2,cfa-mir-24-2,ssc-mir-24-1,cpo-mir-24-2,dno-mir-24b,ocu-mir-24-2,cgr-mir-24,	hsa-mir-24-2	ctctgcctcccgTGCCTACTGAGCTGAAACACAGttggtttgtgtacacTGGCTCAGTTCAGCAGGAACAGgg	hsa-miR-24-2-5p	TGCCTACTGAGCTGAAACACAG	5'	Diff	gp1a	((.((((..(((((..(((.((.((.(((.(((((((((....((((.(.........)))))..))))))))).))).)).)))))..)))))....))))))	104	60.6	-45.8	0	9	0	0	7.61309	0	low
38	51	hsa-miR-24-3p_R-2	TGGCTCAGTTCAGCAGGAAC	20	chr19	-	13836268	13836371	ggcctccctgggctctgcctcccGTGCCTACTGAGCTGAAACACAGttggtttgtgtacacTGGCTCAGTTCAGCAGGAACaggggtcaagcccccttggagcc	20	hsa-mir-24-2,ptr-mir-24-2,ppy-mir-24-2,ggo-mir-24,ppa-mir-24-2,mml-mir-24-2,mne-mir-24-2,cja-mir-24-1,nle-mir-24-2,oga-mir-24-2,sbo-mir-24-1,bta-mir-24-2,eca-mir-24-1,mdo-mir-24-2,cfa-mir-24-2,ssc-mir-24-1,cpo-mir-24-2,dno-mir-24b,ocu-mir-24-2,cgr-mir-24,	hsa-mir-24-2	ctctgcctcccgTGCCTACTGAGCTGAAACACAGttggtttgtgtacacTGGCTCAGTTCAGCAGGAACAGgg	hsa-miR-24-3p	TGGCTCAGTTCAGCAGGAACAG	3'	Diff	gp1a	((.((((..(((((..(((.((.((.(((.(((((((((....((((.(.........)))))..))))))))).))).)).)))))..)))))....))))))	104	60.6	-45.8	155	217.5	141	140.828	183.983	188.221	middle
39	52	hsa-miR-25-3p	CATTGCACTTGTCTCGGTCTGA	22	chr7	-	100093552	100093650	cgggactggccagtgttgagaggcggagacttgggcaattgctggacgctgccctgggCATTGCACTTGTCTCGGTCTGAcagtgccggcccaacactg	28	hsa-mir-25,ptr-mir-25,ppy-mir-25,ggo-mir-25,ppa-mir-25,mml-mir-25,mne-mir-25,lla-mir-25,mmu-mir-25,eca-mir-25,aja-mir-25,cja-mir-25,nle-mir-25,oga-mir-25,dma-mir-25,cpo-mir-25,pal-mir-25,dno-mir-25,ocu-mir-25,tch-mir-25,bta-mir-25,oar-mir-25,mdo-mir-25,cfa-mir-25,efu-mir-25,rno-mir-25,chi-mir-25,cgr-mir-25,	hsa-mir-25	ggccagtgttgagAGGCGGAGACTTGGGCAATTGctggacgctgccctgggCATTGCACTTGTCTCGGTCTGAcagtgccggcc	hsa-miR-25-3p	CATTGCACTTGTCTCGGTCTGA	3'	Yes	gp1a	.(((.((((.((.((((...((((.(((((..(((((((.(((((.......))..)))))))).)).))))).)))))))).))))))))).......	91	62.6	-41.3	458	313	292	416.125	264.766	389.792	high
40	53	hsa-miR-26b-5p_R+1	TTCAAGTAATTCAGGATAGGTT	22	chr2	+	218402629	218402749	ccctcgccccaccctgcccgggacccagTTCAAGTAATTCAGGATAGGTTgtgtgctgtccagCCTGTTCTCCATTACTTGGCTCGgggaccggtgccctgcagccttggggtgagggggc	24	hsa-mir-26b,ppy-mir-26b,mml-mir-26b,ptr-mir-26b,ggo-mir-26b,ppa-mir-26b,mmr-mir-26b,dma-mir-26b,cfa-mir-26b,tch-mir-26b,cja-mir-26b,oga-mir-26b,mmu-mir-26b,bta-mir-26b,oar-mir-26b,efu-mir-26b,rno-mir-26b,ssc-mir-26b,cpo-mir-26b,ocu-mir-26b,pal-mir-26b,dno-mir-26b,chi-mir-26b,cgr-mir-26b,	hsa-mir-26b	ccgggacccagTTCAAGTAATTCAGGATAGGTtgtgtgctgtccagCCTGTTCTCCATTACTTGGCTcggggaccgg	hsa-miR-26b-5p	TTCAAGTAATTCAGGATAGGT	5'	Diff	gp1a	(((((((((((..((((((((..((((((.((((((((..(((((((((((.........)))))))))))..))))))))))).)))..))))......))))...)))))))))))...	118	63.6	-67.6	1616.67	1475.67	933.667	1468.85	1248.27	1246.36	high
40	54	hsa-miR-26b-3p_R+2	CCTGTTCTCCATTACTTGGCTCT	23	chr2	+	218402629	218402749	ccctcgccccaccctgcccgggacccagTTCAAGTAATTCAGGATAGGTTgtgtgctgtccagCCTGTTCTCCATTACTTGGCTCGgggaccggtgccctgcagccttggggtgagggggc	24	hsa-mir-26b,ppy-mir-26b,mml-mir-26b,ptr-mir-26b,ggo-mir-26b,ppa-mir-26b,mmr-mir-26b,dma-mir-26b,cfa-mir-26b,tch-mir-26b,cja-mir-26b,oga-mir-26b,mmu-mir-26b,bta-mir-26b,oar-mir-26b,efu-mir-26b,rno-mir-26b,ssc-mir-26b,cpo-mir-26b,ocu-mir-26b,pal-mir-26b,dno-mir-26b,chi-mir-26b,cgr-mir-26b,	hsa-mir-26b	ccgggacccagTTCAAGTAATTCAGGATAGGTtgtgtgctgtccagCCTGTTCTCCATTACTTGGCTcggggaccgg	hsa-miR-26b-3p	CCTGTTCTCCATTACTTGGCT	3'	Diff	gp1a	(((((((((((..((((((((..((((((.((((((((..(((((((((((.........)))))))))))..))))))))))).)))..))))......))))...)))))))))))...	118	63.6	-67.6	0	6	0	0	5.07539	0	low
41	55	hsa-miR-26a-5p	TTCAAGTAATCCAGGATAGGCT	22	chr3	+	37969359	37969530	gccacaggagccaagagcaggaggaccaaggccctggcgaaggccgtggcctcgTTCAAGTAATCCAGGATAGGCTgtgcaggtcccaatgggcctattcttggttacttgcacggggacgcgggcctggacgccggcatccgggctcaggacccccctctctgccagaggc	25	hsa-mir-26a-1,ptr-mir-26a-1,ppy-mir-26a,ggo-mir-26a,ppa-mir-26a,mml-mir-26a-1,lla-mir-26a,cja-mir-26a-1,nle-mir-26a-1,oga-mir-26a-1,mmr-mir-26a-1,dma-mir-26a-1,sbo-mir-26a-1,cfa-mir-26a-1,pal-mir-26a-1,mne-mir-26a,mmu-mir-26a-1,bta-mir-26a-1,chi-mir-26a,eca-mir-26a-2,efu-mir-26a,rno-mir-26a,cpo-mir-26a-1,dno-mir-26a-1,cgr-mir-26a-1,	hsa-mir-26a-1	gtggcctcgTTCAAGTAATCCAGGATAGGCTgtgcaggtcccaatgggCCTATTCTTGGTTACTTGCACGgggacgc	hsa-miR-26a-5p	TTCAAGTAATCCAGGATAGGCT	5'	Yes	gp1a	.........(((....((((((((.((..((((((((((.((((((((.((((((.(((((((((.((((((((((...((........)))))))))))).))))))))).)))))).))))).)))...)))))......)))))..)).....)))).))))....)))	163	65.1	-79.5	3543.67	3034.67	2431.17	3219.66	2567.02	3245.37	high
42	56	hsa-miR-26a-5p	TTCAAGTAATCCAGGATAGGCT	22	chr12	-	57824609	57824692	ggctgtggctggaTTCAAGTAATCCAGGATAGGCTgtttccatctgtgaggcctattcttgattacttgtttctggaggcagct	23	hsa-mir-26a-2,ppy-mir-26a-2,mml-mir-26a-2,cja-mir-26a-2,bta-mir-26a-2,eca-mir-26a,ssc-mir-26a,ptr-mir-26a-2,nle-mir-26a-2,oga-mir-26a-2,dma-mir-26a-2,sbo-mir-26a-2,cpo-mir-26a-2,pal-mir-26a-2,mmr-mir-26a-2,mmu-mir-26a-2,cfa-mir-26a-2,efu-mir-26c,dno-mir-26a-2,ocu-mir-26a,cgr-mir-26a-2,tch-mir-26a-1,oar-mir-26a,	hsa-mir-26a-2	ggctgtggctggaTTCAAGTAATCCAGGATAGGCTgtttccatctgtgaggCCTATTCTTGATTACTTGTTTCtggaggcagct	hsa-miR-26a-5p	TTCAAGTAATCCAGGATAGGCT	5'	Yes	gp1a	((((((..(..((..(((((((((.((((((((((..............)))))))))).)))))))))..))..)..))))))	84	47.6	-42.2	3543.67	3034.67	2431.17	3219.66	2567.02	3245.37	high
43	57	hsa-miR-27a-5p	AGGGCTTAGCTGCTTGTGAGCA	22	chr19	-	13836406	13836568	gatgctgcccggggacggggtggcagagaggccccgaagcctgtgcctggcctgaggagcAGGGCTTAGCTGCTTGTGAGCAgggtccacaccaagtcgtgTTCACAGTGGCTAAGTTCCGCcccccaggccctcacctcctctggccttgccgcctgtcccc	27	hsa-mir-27a,ptr-mir-27a,ggo-mir-27a,ppa-mir-27a,mml-mir-27a,ppy-mir-27a,cja-mir-27a,oga-mir-27a,mne-mir-27a,age-mir-27a,sla-mir-27a,sbo-mir-27a,lca-mir-27a,mmu-mir-27a,bta-mir-27a,eca-mir-27a,cfa-mir-27a,efu-mir-27a,rno-mir-27a,ssc-mir-27a,cpo-mir-27a,pal-mir-27a,dno-mir-27a,chi-mir-27a,cgr-mir-27a,tch-mir-27a,oar-mir-27a,	hsa-mir-27a	ctgaggagcAGGGCTTAGCTGCTTGTGAGCAgggtccacaccaagtcgtgTTCACAGTGGCTAAGTTCCGCcccccag	hsa-miR-27a-5p	AGGGCTTAGCTGCTTGTGAGCA	5'	Yes	gp1a	..........(((((((((.(((((...(((((..((.....(((...((((((.((.((.(..((((((..((.(((((((.((...........)).)))))))))..))))))..).)).)).))))))..)))....)).)))))))))))))))))))	153	67.5	-86.4	0	10	0	0	8.45899	0	low
43	58	hsa-miR-27a-3p	TTCACAGTGGCTAAGTTCCGC	21	chr19	-	13836406	13836568	gatgctgcccggggacggggtggcagagaggccccgaagcctgtgcctggcctgaggagcAGGGCTTAGCTGCTTGTGAGCAgggtccacaccaagtcgtgTTCACAGTGGCTAAGTTCCGCcccccaggccctcacctcctctggccttgccgcctgtcccc	27	hsa-mir-27a,ptr-mir-27a,ggo-mir-27a,ppa-mir-27a,mml-mir-27a,ppy-mir-27a,cja-mir-27a,oga-mir-27a,mne-mir-27a,age-mir-27a,sla-mir-27a,sbo-mir-27a,lca-mir-27a,mmu-mir-27a,bta-mir-27a,eca-mir-27a,cfa-mir-27a,efu-mir-27a,rno-mir-27a,ssc-mir-27a,cpo-mir-27a,pal-mir-27a,dno-mir-27a,chi-mir-27a,cgr-mir-27a,tch-mir-27a,oar-mir-27a,	hsa-mir-27a	ctgaggagcAGGGCTTAGCTGCTTGTGAGCAgggtccacaccaagtcgtgTTCACAGTGGCTAAGTTCCGCcccccag	hsa-miR-27a-3p	TTCACAGTGGCTAAGTTCCGC	3'	Yes	gp1a	..........(((((((((.(((((...(((((..((.....(((...((((((.((.((.(..((((((..((.(((((((.((...........)).)))))))))..))))))..).)).)).))))))..)))....)).)))))))))))))))))))	153	67.5	-86.4	329.5	362.5	179	299.373	306.638	238.948	middle
44	59	hsa-miR-27b-3p	TTCACAGTGGCTAAGTTCTGC	21	chr9	+	95085415	95085581	tcaccgtccctttatttatgcccagcgatgacctctctaacaaggtgcagagcttagctgattggtgaacagtgattggtttccgctttgTTCACAGTGGCTAAGTTCTGCacctgaagagaaggtgagatggggacagttaagttggagccgctggggcagaggcc	27	hsa-mir-27b,ppy-mir-27b,mml-mir-27b,rno-mir-27b,ptr-mir-27b,ggo-mir-27b,ppa-mir-27b,mmr-mir-27b,sbo-mir-27b,cpo-mir-27b,tch-mir-27b,cja-mir-27b,nle-mir-27b,oga-mir-27b,dma-mir-27b,mmu-mir-27b,bta-mir-27b,eca-mir-27b,mdo-mir-27b,cfa-mir-27b,pal-mir-27b,efu-mir-27b,ssc-mir-27b,dno-mir-27b,ocu-mir-27b,chi-mir-27b,cgr-mir-27b,	hsa-mir-27b	acctctctaacaaggtgcAGAGCTTAGCTGATTGGTGAACagtgattggtttccgctttgTTCACAGTGGCTAAGTTCTGCacctgaagagaaggtg	hsa-miR-27b-3p	TTCACAGTGGCTAAGTTCTGC	3'	Yes	gp1a	........((((......(((((((((...((((((((....(((((((((((((((((.((((.(((((((....(((...)))..))))))))))))))))))))))))))))..))))).)))....((....)).............))))))).))))))..	96	51.5	-69.6	1319.5	1403.5	771	1198.86	1187.22	1029.21	high
45	60	hsa-miR-28-5p_R-1	AAGGAGCTCACAGTCTATTGA	21	chr3	+	188688781	188688866	ggtccttgccctcAAGGAGCTCACAGTCTATTGAgttacctttctgactttccCACTAGATTGTGAGCTCCTGGAgggcaggcact	25	hsa-mir-28,ptr-mir-28,ggo-mir-28,ppa-mir-28,ppy-mir-28,mml-mir-28,nle-mir-28,mmr-mir-28,cfa-mir-28,mne-mir-28,dma-mir-28,age-mir-28,lla-mir-28,eca-mir-28,sbo-mir-28,sla-mir-28,mmu-mir-28a,bta-mir-28,chi-mir-28,efu-mir-28,rno-mir-28,ssc-mir-28,pal-mir-28,dno-mir-28,cgr-mir-28,	hsa-mir-28	ggtccttgccctcAAGGAGCTCACAGTCTATTGAGttacctttctgactttccCACTAGATTGTGAGCTCCTGGAgggcaggcact	hsa-miR-28-5p	AAGGAGCTCACAGTCTATTGAG	5'	Diff	gp1a	(((.(((((((((.((((((((((((((((.(((((((......)))))....)).)))))))))))))))).))))))))).)))	86	52.3	-50.6	57	80	27	51.7884	67.6719	36.0424	middle
45	61	hsa-miR-28-3p	CACTAGATTGTGAGCTCCTGGA	22	chr3	+	188688781	188688866	ggtccttgccctcAAGGAGCTCACAGTCTATTGAgttacctttctgactttccCACTAGATTGTGAGCTCCTGGAgggcaggcact	25	hsa-mir-28,ptr-mir-28,ggo-mir-28,ppa-mir-28,ppy-mir-28,mml-mir-28,nle-mir-28,mmr-mir-28,cfa-mir-28,mne-mir-28,dma-mir-28,age-mir-28,lla-mir-28,eca-mir-28,sbo-mir-28,sla-mir-28,mmu-mir-28a,bta-mir-28,chi-mir-28,efu-mir-28,rno-mir-28,ssc-mir-28,pal-mir-28,dno-mir-28,cgr-mir-28,	hsa-mir-28	ggtccttgccctcAAGGAGCTCACAGTCTATTGAGttacctttctgactttccCACTAGATTGTGAGCTCCTGGAgggcaggcact	hsa-miR-28-3p	CACTAGATTGTGAGCTCCTGGA	3'	Yes	gp1a	(((.(((((((((.((((((((((((((((.(((((((......)))))....)).)))))))))))))))).))))))))).)))	86	52.3	-50.6	102	124	71	92.674	104.891	94.7782	middle
46	62	hsa-miR-29a-3p	TAGCACCATCTGAAATCGGTTA	22	chr7	-	130876735	130876822	accccttagaggatgactgatttcttttggtgttcagagtcaatataattttcTAGCACCATCTGAAATCGGTTAtaatgattgggga	32	hsa-mir-29a,ptr-mir-29a,ppy-mir-29a,ggo-mir-29a,ppa-mir-29a,mml-mir-29a,mne-mir-29a,age-mir-29a,lla-mir-29a,sla-mir-29a,bta-mir-29a,oar-mir-29a,cja-mir-29a,nle-mir-29a,oga-mir-29a,mmr-mir-29a,dma-mir-29a,cfa-mir-29a,cpo-mir-29a,dno-mir-29a,sbo-mir-29a,mmu-mir-29a,rno-mir-29a,eca-mir-29a,mdo-mir-29a-1,efu-mir-29a,ssc-mir-29a,pal-mir-29a,ocu-mir-29a,chi-mir-29a,cgr-mir-29a,tch-mir-29a,	hsa-mir-29a	atgACTGATTTCTTTTGGTGTTCAGagtcaatataattttcTAGCACCATCTGAAATCGGTTAt	hsa-miR-29a-3p	TAGCACCATCTGAAATCGGTTA	3'	Yes	gp1a	.((((.......((((((((((((...(((((((.((((...........)))))))))))...)))))))))))).......)))).	64	37.5	-34.6	510	574	228.5	463.37	485.546	305.025	high
47	63	hsa-miR-29b-3p	TAGCACCATTTGAAATCAGTGTT	23	chr7	-	130877457	130877543	gcttcttcaggaagctggtttcatatggtggtttagatttaaatagtgattgtcTAGCACCATTTGAAATCAGTGTTcttgggggag	26	hsa-mir-29b-1,ptr-mir-29b-1,ppy-mir-29b-1,ggo-mir-29b-1,ppa-mir-29b-1,mml-mir-29b-1,age-mir-29b,lla-mir-29b,bta-mir-29b-1,eca-mir-29b,cja-mir-29b-2,nle-mir-29b-1,cfa-mir-29b-1,pal-mir-29b-1,oga-mir-29b-1,mmr-mir-29b-1,cpo-mir-29b-1,dno-mir-29b-1,ocu-mir-29b-1,tch-mir-29b-2,mmu-mir-29b-1,mdo-mir-29b-1,efu-mir-29b,rno-mir-29b-1,ssc-mir-29b-1,cgr-mir-29b,	hsa-mir-29b-1	cttcaggaaGCTGGTTTCATATGGTGGTTTAGAtttaaatagtgattgtcTAGCACCATTTGAAATCAGTGTTcttggggg	hsa-miR-29b-3p	TAGCACCATTTGAAATCAGTGTT	3'	Yes	gp1a	.((((..((((((((((((((((.((((((..((((((.............)))))))))))).)))))))))).))))))..))))	86	40.2	-37.8	4	0	3.5	3.63428	0	4.67216	low
48	64	hsa-miR-29c-3p	TAGCACCATTTGAAATCGGTTA	22	chr1	-	207801845	207801956	gggagcaccactggcccatctcttacacaggctgaccgatttctcctggtgttcagagtctgtttttgtcTAGCACCATTTGAAATCGGTTAtgatgtagggggaaaagcag	26	hsa-mir-29c,ppy-mir-29c,mml-mir-29c,mmu-mir-29c,bta-mir-29c,eca-mir-29c,rno-mir-29c-2,rno-mir-29c-1,ssc-mir-29c,aja-mir-29c,ptr-mir-29c,ggo-mir-29c,cja-mir-29c,nle-mir-29c,cfa-mir-29c-1,cfa-mir-29c-2,cpo-mir-29c,ocu-mir-29c,mmr-mir-29c,dno-mir-29c,eca-mir-29c-2,mdo-mir-29a-2,efu-mir-29c,pal-mir-29c,cgr-mir-29c,tch-mir-29c,	hsa-mir-29c	atctcttacacaggcTGACCGATTTCTCCTGGTGTTCagagtctgtttttgtcTAGCACCATTTGAAATCGGTTAtgatgtaggggga	hsa-miR-29c-3p	TAGCACCATTTGAAATCGGTTA	3'	Yes	gp1a	(((..((....)).))).(((((((((((...(((((((((((...((((((((((((.....)))))...)))))))...))))))))))))).)))))))))........	86	49.1	-39.3	22	14	2.5	19.9885	11.8426	3.33726	middle
49	65	hsa-miR-29b-3p	TAGCACCATTTGAAATCAGTGTT	23	chr1	-	207802438	207802527	tcttcttctggaagctggtttcacatggtggcttagatttttccatctttgtatcTAGCACCATTTGAAATCAGTGTTttaggagtaaga	28	hsa-mir-29b-2,ptr-mir-29b-2,ppy-mir-29b-2,ggo-mir-29b-2,ppa-mir-29b-2,mml-mir-29b-2,mne-mir-29b,sla-mir-29b,mmu-mir-29b-2,bta-mir-29b-2,eca-mir-29b-2,rno-mir-29b-3,rno-mir-29b-2,oar-mir-29b-1,oar-mir-29b-2,aja-mir-29b,cja-mir-29b-1,nle-mir-29b-2,oga-mir-29b-2,mmr-mir-29b-2,cfa-mir-29b-2,ssc-mir-29b-2,chi-mir-29b,cpo-mir-29b-2,pal-mir-29b-2,dno-mir-29b-2,ocu-mir-29b-2,tch-mir-29b-1,	hsa-mir-29b-2	cttctggaagCTGGTTTCACATGGTGGCTTAGatttttccatctttgtatcTAGCACCATTTGAAATCAGTGTTttaggag	hsa-miR-29b-3p	TAGCACCATTTGAAATCAGTGTT	3'	Yes	gp1a	(((((((((..((((((((((((.((((((.((.((((..............)))))))))))).)))))))))).))..))))).))))	90	37.8	-33.5	4	0	3.5	3.63428	0	4.67216	low
50	66	hsa-miR-30b-5p	TGTAAACATCCTACACTCAGCT	22	chr8	-	134800520	134800607	accaagtttcagttcaTGTAAACATCCTACACTCAGCTgtaatacatggattggCTGGGAGGTGGATGTTTACTTcagctgacttgga	26	hsa-mir-30b,ptr-mir-30b,ppy-mir-30b,ppa-mir-30b,mml-mir-30b,mne-mir-30b,ggo-mir-30b,cja-mir-30b,nle-mir-30b,oga-mir-30b,age-mir-30b,lla-mir-30b,mmu-mir-30b,bta-mir-30b,eca-mir-30b,cfa-mir-30b,rno-mir-30b,ssc-mir-30b,cpo-mir-30b,pal-mir-30b,dno-mir-30b,ocu-mir-30b,chi-mir-30b,cgr-mir-30b,tch-mir-30b,oar-mir-30b,	hsa-mir-30b	accaagtttcagttcaTGTAAACATCCTACACTCAGCTgtaatacatggattggCTGGGAGGTGGATGTTTACTTCagctgacttgga	hsa-miR-30b-5p	TGTAAACATCCTACACTCAGCT	5'	Yes	gp1a	.(((((..((((((...((((((((((.((.(((((((..............)))))))..))))))))))))...))))))))))).	86	43.2	-36.8	236	246	148	214.422	208.091	197.566	middle
50	67	hsa-miR-30b-3p_R-1	CTGGGAGGTGGATGTTTACTT	21	chr8	-	134800520	134800607	accaagtttcagttcaTGTAAACATCCTACACTCAGCTgtaatacatggattggCTGGGAGGTGGATGTTTACTTcagctgacttgga	26	hsa-mir-30b,ptr-mir-30b,ppy-mir-30b,ppa-mir-30b,mml-mir-30b,mne-mir-30b,ggo-mir-30b,cja-mir-30b,nle-mir-30b,oga-mir-30b,age-mir-30b,lla-mir-30b,mmu-mir-30b,bta-mir-30b,eca-mir-30b,cfa-mir-30b,rno-mir-30b,ssc-mir-30b,cpo-mir-30b,pal-mir-30b,dno-mir-30b,ocu-mir-30b,chi-mir-30b,cgr-mir-30b,tch-mir-30b,oar-mir-30b,	hsa-mir-30b	accaagtttcagttcaTGTAAACATCCTACACTCAGCTgtaatacatggattggCTGGGAGGTGGATGTTTACTTCagctgacttgga	hsa-miR-30b-3p	CTGGGAGGTGGATGTTTACTTC	3'	Diff	gp1a	.(((((..((((((...((((((((((.((.(((((((..............)))))))..))))))))))))...))))))))))).	86	43.2	-36.8	0	5	5	0	4.2295	6.67452	low
51	68	hsa-miR-30a-5p_R+2	TGTAAACATCCTCGACTGGAAGCT	24	chr6	-	71403543	71403627	cagtgagcgacTGTAAACATCCTCGACTGGAAGCTgtgaagccacagatgggCTTTCAGTCGGATGTTTGCAGCtgcctactgcc	24	hsa-mir-30a,ptr-mir-30a,ppy-mir-30a,ggo-mir-30a,ppa-mir-30a,mml-mir-30a,cja-mir-30a,nle-mir-30a,cfa-mir-30a,tch-mir-30a,oga-mir-30a,mmr-mir-30a,dma-mir-30a,mmu-mir-30a,bta-mir-30a,oar-mir-30a,mdo-mir-30a,efu-mir-30a,rno-mir-30a,cpo-mir-30a,pal-mir-30a,dno-mir-30a,ocu-mir-30a,cgr-mir-30a,	hsa-mir-30a	gcgacTGTAAACATCCTCGACTGGAAGctgtgaagccacagatgggCTTTCAGTCGGATGTTTGCAGCtgc	hsa-miR-30a-5p	TGTAAACATCCTCGACTGGAAG	5'	Diff	gp1a	((((..((..((((((((((((..((((((((((((((....))).....)))))))))))))))))))))))..))..))))..	83	54.1	-43.4	996	1290	481	904.935	1091.21	642.089	high
51	69	hsa-miR-30a-3p_1ss22CT	CTTTCAGTCGGATGTTTGCAGT	22	chr6	-	71403543	71403627	cagtgagcgacTGTAAACATCCTCGACTGGAAGCTgtgaagccacagatgggCTTTCAGTCGGATGTTTGCAGCtgcctactgcc	24	hsa-mir-30a,ptr-mir-30a,ppy-mir-30a,ggo-mir-30a,ppa-mir-30a,mml-mir-30a,cja-mir-30a,nle-mir-30a,cfa-mir-30a,tch-mir-30a,oga-mir-30a,mmr-mir-30a,dma-mir-30a,mmu-mir-30a,bta-mir-30a,oar-mir-30a,mdo-mir-30a,efu-mir-30a,rno-mir-30a,cpo-mir-30a,pal-mir-30a,dno-mir-30a,ocu-mir-30a,cgr-mir-30a,	hsa-mir-30a	gcgacTGTAAACATCCTCGACTGGAAGctgtgaagccacagatgggCTTTCAGTCGGATGTTTGCAGCtgc	hsa-miR-30a-3p	CTTTCAGTCGGATGTTTGCAGC	3'	Diff	gp1a	((((..((..((((((((((((..((((((((((((((....))).....)))))))))))))))))))))))..))..))))..	83	54.1	-43.4	51	78.5	9	46.337	66.4031	12.0141	middle
52	70	hsa-miR-30c-5p_R+1	TGTAAACATCCTACACTCTCAGCT	24	chr6	-	71376933	71377045	gagcactgagcgacagatacTGTAAACATCCTACACTCTCAGCTgtggaaagtaagaaagCTGGGAGAAGGCTGTTTACTCTttctgccttggaagtcaactaaagagaaatg	25	hsa-mir-30c-2,ptr-mir-30c-2,mne-mir-30c,lla-mir-30c,ggo-mir-30c,mml-mir-30c-2,cja-mir-30c,nle-mir-30c,cfa-mir-30c-2,oga-mir-30c,mmr-mir-30c,dma-mir-30c,pal-mir-30c,mmu-mir-30c-2,bta-mir-30f,eca-mir-30c-2,mdo-mir-30c-1,efu-mir-30b,rno-mir-30c-2,ssc-mir-30c-2,cpo-mir-30c-2,dno-mir-30c-2,ocu-mir-30c-2,cgr-mir-30c-2,tch-mir-30c,	hsa-mir-30c-2	agatacTGTAAACATCCTACACTCTCAGCtgtggaaagtaagaaagCTGGGAGAAGGCTGTTTACTCTttct	hsa-miR-30c-5p	TGTAAACATCCTACACTCTCAGC	5'	Diff	gp1a	((...(..((...((((....(((((((.(((...(((((((((..............))))))))).))).)))))))....)))).))..)...))...............	98	44.2	-32.1	732.5	753	393	665.527	636.962	524.617	high
52	71	hsa-miR-30c-2-3p	CTGGGAGAAGGCTGTTTACTCT	22	chr6	-	71376933	71377045	gagcactgagcgacagatacTGTAAACATCCTACACTCTCAGCTgtggaaagtaagaaagCTGGGAGAAGGCTGTTTACTCTttctgccttggaagtcaactaaagagaaatg	25	hsa-mir-30c-2,ptr-mir-30c-2,mne-mir-30c,lla-mir-30c,ggo-mir-30c,mml-mir-30c-2,cja-mir-30c,nle-mir-30c,cfa-mir-30c-2,oga-mir-30c,mmr-mir-30c,dma-mir-30c,pal-mir-30c,mmu-mir-30c-2,bta-mir-30f,eca-mir-30c-2,mdo-mir-30c-1,efu-mir-30b,rno-mir-30c-2,ssc-mir-30c-2,cpo-mir-30c-2,dno-mir-30c-2,ocu-mir-30c-2,cgr-mir-30c-2,tch-mir-30c,	hsa-mir-30c-2	agatacTGTAAACATCCTACACTCTCAGCtgtggaaagtaagaaagCTGGGAGAAGGCTGTTTACTCTttct	hsa-miR-30c-2-3p	CTGGGAGAAGGCTGTTTACTCT	3'	Yes	gp1a	((...(..((...((((....(((((((.(((...(((((((((..............))))))))).))).)))))))....)))).))..)...))...............	98	44.2	-32.1	17	11	0	15.4457	9.30489	0	middle
53	72	hsa-miR-30c-5p_R+1	TGTAAACATCCTACACTCTCAGCT	24	chr1	+	40757282	40757376	taaccatgctgtagtgtgTGTAAACATCCTACACTCTCAGCTgtgagctcaaggtggctgggagagggttgtttactccttctgccatggaaaac	18	hsa-mir-30c-1,ppy-mir-30c-1,mml-mir-30c-1,eca-mir-30c,ptr-mir-30c-1,mmu-mir-30c-1,rno-mir-30c-1,cgr-mir-30c-1,bta-mir-30c,chi-mir-30c,oar-mir-30c,mdo-mir-30c-2,cfa-mir-30c-1,dno-mir-30c-1,ocu-mir-30c-1,efu-mir-30c,ssc-mir-30c-1,cpo-mir-30c-1,	hsa-mir-30c-1	accatgctgtagtgtgTGTAAACATCCTACACTCTCAGCtgtgagctcaaggtggCTGGGAGAGGGTTGTTTACTCCttctgccatgga	hsa-miR-30c-5p	TGTAAACATCCTACACTCTCAGC	5'	Diff	gp1a	...(((((..((((.....(((((((.(((...((((((((..(.........)..)))))))).))).))))))).....))))))))).....	87	48.4	-34.7	732.5	753	393	665.527	636.962	524.617	high
54	73	hsa-miR-30d-5p_R+2	TGTAAACATCCCCGACTGGAAGCT	24	chr8	-	134804867	134804956	tcagaaagtctgttgtTGTAAACATCCCCGACTGGAAGCTgtaagacacagctaagcTTTCAGTCAGATGTTTGCTGCTaccggctattc	25	hsa-mir-30d,ptr-mir-30d,ppy-mir-30d,ggo-mir-30d,ppa-mir-30d,mne-mir-30d,mml-mir-30d,cja-mir-30d,nle-mir-30d,oga-mir-30d,mmu-mir-30d,rno-mir-30d,bta-mir-30d,oar-mir-30d,eca-mir-30d,mdo-mir-30e,cfa-mir-30d,efu-mir-30d,ssc-mir-30d,cpo-mir-30d,pal-mir-30d,dno-mir-30d,ocu-mir-30d,chi-mir-30d,cgr-mir-30d,	hsa-mir-30d	gttgtTGTAAACATCCCCGACTGGAAGctgtaagacacagctaagCTTTCAGTCAGATGTTTGCTGCtac	hsa-miR-30d-5p	TGTAAACATCCCCGACTGGAAG	5'	Diff	gp1a	...(((((((.((.(..(((((((((...(((((((((((..............))))))))))).)))))))))..).)).)))).)))	87	45.6	-33.4	1569	1336	1058	1425.54	1130.12	1412.33	high
54	74	hsa-miR-30d-3p_L-1R+1	TTTCAGTCAGATGTTTGCTGCT	22	chr8	-	134804867	134804956	tcagaaagtctgttgtTGTAAACATCCCCGACTGGAAGCTgtaagacacagctaagcTTTCAGTCAGATGTTTGCTGCTaccggctattc	25	hsa-mir-30d,ptr-mir-30d,ppy-mir-30d,ggo-mir-30d,ppa-mir-30d,mne-mir-30d,mml-mir-30d,cja-mir-30d,nle-mir-30d,oga-mir-30d,mmu-mir-30d,rno-mir-30d,bta-mir-30d,oar-mir-30d,eca-mir-30d,mdo-mir-30e,cfa-mir-30d,efu-mir-30d,ssc-mir-30d,cpo-mir-30d,pal-mir-30d,dno-mir-30d,ocu-mir-30d,chi-mir-30d,cgr-mir-30d,	hsa-mir-30d	gttgtTGTAAACATCCCCGACTGGAAGctgtaagacacagctaagCTTTCAGTCAGATGTTTGCTGCtac	hsa-miR-30d-3p	CTTTCAGTCAGATGTTTGCTGC	3'	Diff	gp1a	...(((((((.((.(..(((((((((...(((((((((((..............))))))))))).)))))))))..).)).)))).)))	87	45.6	-33.4	0	5	0	0	4.2295	0	low
55	75	hsa-miR-30e-5p_R+2	TGTAAACATCCTTGACTGGAAGCT	24	chr1	+	40754351	40754463	ttctgggcagtctttgctacTGTAAACATCCTTGACTGGAAGCTgtaaggtgttcagaggagCTTTCAGTCGGATGTTTACAGCggcaggctgccacggtcgtccccagctac	25	hsa-mir-30e,ppy-mir-30e,eca-mir-30e,ptr-mir-30e,ggo-mir-30e,ppa-mir-30e,nle-mir-30e,oga-mir-30e,mmr-mir-30e,dma-mir-30e,pal-mir-30e,mml-mir-30e,cja-mir-30e,mmu-mir-30e,rno-mir-30e,bta-mir-30e,mdo-mir-30d,cfa-mir-30e,efu-mir-30e,ssc-mir-30e,cpo-mir-30e,dno-mir-30e,ocu-mir-30e,chi-mir-30e,cgr-mir-30e,	hsa-mir-30e	gggcagtctttgctacTGTAAACATCCTTGACTGGAAGctgtaaggtgttcagaggagCTTTCAGTCGGATGTTTACAGCggcaggctgcca	hsa-miR-30e-5p	TGTAAACATCCTTGACTGGAAG	5'	Diff	gp1a	..((((((((((..(((..((((((((((((..(((((((((((................)))))))))))))))))))))))..)))))))))).)))..............	97	53.1	-54	2028	1932	1185	1842.58	1634.28	1581.86	high
55	76	hsa-miR-30e-3p_1ss22CT	CTTTCAGTCGGATGTTTACAGT	22	chr1	+	40754351	40754463	ttctgggcagtctttgctacTGTAAACATCCTTGACTGGAAGCTgtaaggtgttcagaggagCTTTCAGTCGGATGTTTACAGCggcaggctgccacggtcgtccccagctac	25	hsa-mir-30e,ppy-mir-30e,eca-mir-30e,ptr-mir-30e,ggo-mir-30e,ppa-mir-30e,nle-mir-30e,oga-mir-30e,mmr-mir-30e,dma-mir-30e,pal-mir-30e,mml-mir-30e,cja-mir-30e,mmu-mir-30e,rno-mir-30e,bta-mir-30e,mdo-mir-30d,cfa-mir-30e,efu-mir-30e,ssc-mir-30e,cpo-mir-30e,dno-mir-30e,ocu-mir-30e,chi-mir-30e,cgr-mir-30e,	hsa-mir-30e	gggcagtctttgctacTGTAAACATCCTTGACTGGAAGctgtaaggtgttcagaggagCTTTCAGTCGGATGTTTACAGCggcaggctgcca	hsa-miR-30e-3p	CTTTCAGTCGGATGTTTACAGC	3'	Diff	gp1a	..((((((((((..(((..((((((((((((..(((((((((((................)))))))))))))))))))))))..)))))))))).)))..............	97	53.1	-54	148	106.5	83	134.468	90.0882	110.797	middle
56	77	hsa-miR-31-5p_R+1	AGGCAAGATGCTGGCATAGCTG	22	chr9	-	21512101	21512203	ctcctgtaacttggaactggagaggAGGCAAGATGCTGGCATAGCTGttgaactgggaacctgctatgccaacatattgccatctttcctgtctgacagcagc	24	hsa-mir-31,ptr-mir-31,ppy-mir-31,ggo-mir-31,ppa-mir-31,mml-mir-31,mne-mir-31,cja-mir-31,nle-mir-31,oga-mir-31,mmr-mir-31,dma-mir-31,cfa-mir-31,ocu-mir-31,mmu-mir-31,bta-mir-31,eca-mir-31,efu-mir-31,rno-mir-31a,ssc-mir-31,cpo-mir-31,pal-mir-31,dno-mir-31,cgr-mir-31,	hsa-mir-31	ggagaggAGGCAAGATGCTGGCATAGCTgttgaactgggaaccTGCTATGCCAACATATTGCCATctttcc	hsa-miR-31-5p	AGGCAAGATGCTGGCATAGCT	5'	Diff	gp1a	...((((...(..((...((((((..(((((.(((.(((((((((.(((........)))..))))))))).))).)))))..))))))..))..)..)))).	99	50.5	-44.4	17	10	8	15.4457	8.45899	10.6792	middle
57	78	hsa-miR-32-5p_R-1	TATTGCACATTACTAAGTTGC	21	chr9	-	109046215	109046310	gcttgctctggtggagaTATTGCACATTACTAAGTTGCatgttgtcacggcctcaatgcaatttagtgtgtgtgatattttcacatgagtgcatgc	20	hsa-mir-32,ptr-mir-32,ppy-mir-32,ggo-mir-32,ppa-mir-32,mml-mir-32,mne-mir-32,sla-mir-32,mmu-mir-32,cja-mir-32,eca-mir-32,mdo-mir-32,cfa-mir-32,ocu-mir-32,tch-mir-32,rno-mir-32,ssc-mir-32,pal-mir-32,dno-mir-32,cgr-mir-32,	hsa-mir-32	ggagaTATTGCACATTACTAAGTTGCAtgttgtcacggcctcaatgCAATTTAGTGTGTGTGATATTTtc	hsa-miR-32-5p	TATTGCACATTACTAAGTTGCA	5'	Diff	gp1a	((..((((..((((((((((..((((.((((((((((((((..((....))..).)))))))))))))))))..))))))))))..))))))....	92	42.7	-43.7	12	25	9	10.9028	21.1475	12.0141	middle
58	79	hsa-miR-34a-5p	TGGCAGTGTCTTAGCTGGTTGT	22	chr1	-	9151668	9151777	ggccagctgtgagtgtttcttTGGCAGTGTCTTAGCTGGTTGTtgtgagcaatagtaaggaagcaatcagcaagtatactgccctagaagtgctgcacgttgtggggccc	30	hsa-mir-34a,ptr-mir-34a,ppy-mir-34a,ggo-mir-34a,ppa-mir-34a,mml-mir-34a,mne-mir-34a,cja-mir-34a,nle-mir-34a,oga-mir-34a,cfa-mir-34a,mmr-mir-34a,age-mir-34a,lla-mir-34a,sla-mir-34a,mmu-mir-34a,bta-mir-34a,chi-mir-34a,eca-mir-34a,mdo-mir-34a,efu-mir-34a,rno-mir-34a,ssc-mir-34a,cpo-mir-34a,pal-mir-34a,dno-mir-34a,ocu-mir-34a,cgr-mir-34a,tch-mir-34a-2,tch-mir-34a-1,	hsa-mir-34a	ggccagctgtgagtgtttcttTGGCAGTGTCTTAGCTGGTTGTtgtgagcaatagtaaggaagCAATCAGCAAGTATACTGCCCTagaagtgctgcacgttgtggggccc	hsa-miR-34a-5p	TGGCAGTGTCTTAGCTGGTTGT	5'	Yes	gp1a	((((.((((((((..(((((..(((((((((((.((((((((((....((....)).....))))))))))))).))))))))..)))))..)).))))..))..)))).	109	50.9	-50.7	14	7	5	12.72	5.92129	6.67452	middle
59	80	hsa-miR-34c-5p	AGGCAGTGTAGTTAGCTGATTGC	23	chr11	+	111513431	111513538	tttctatgagtctagttactAGGCAGTGTAGTTAGCTGATTGCtaatagtaccaatcactaaccacacggccaggtaaaaagatttgggaattcgtccaaatgagctg	25	hsa-mir-34c,ppy-mir-34c,ptr-mir-34c,ggo-mir-34c,ppa-mir-34c,oga-mir-34c,mmr-mir-34c,cfa-mir-34c,cpo-mir-34c,pal-mir-34c,dno-mir-34c,tch-mir-34c,mml-mir-34c,cja-mir-34c,nle-mir-34c,mmu-mir-34c,rno-mir-34c,bta-mir-34c,eca-mir-34c,efu-mir-34c,ssc-mir-34c-1,ssc-mir-34c-2,ocu-mir-34c,chi-mir-34c,cgr-mir-34c,	hsa-mir-34c	agtctagttactAGGCAGTGTAGTTAGCTGATTGCtaatagtaccAATCACTAACCACACGGCCAGGtaaaaagatt	hsa-miR-34c-5p	AGGCAGTGTAGTTAGCTGATTGC	5'	Yes	gp1a	.......((((((..((((..(((.((((.(((((.((((((.((....)).))))))))))).)))).)))..))))..))))))(((......)))..........	79	40.7	-34.5	8	21	0	7.26855	17.7639	0	middle
60	81	hsa-miR-92b-3p	TATTGCACTCGTCCCGGCCTCC	22	chr1	+	155195167	155195275	agcgggatcccgggccccgggcgggcgggagggacgggacgcggtgcagtgttgttttttcccccgccaaTATTGCACTCGTCCCGGCCTCCggcccccccggcccccc	19	hsa-mir-92b,ptr-mir-92b,ppy-mir-92b,ppa-mir-92b,mml-mir-92b,cja-mir-92b,nle-mir-92b,mmu-mir-92b,bta-mir-92b,eca-mir-92b,mdo-mir-92b,cfa-mir-92b,efu-mir-92b,rno-mir-92b,ssc-mir-92b,cpo-mir-92b,pal-mir-92b,dno-mir-92b,cgr-mir-92b,	hsa-mir-92b	cgggccccgggcgggcgggAGGGACGGGACGCGGTGCAGTGttgttttttcccccgccaaTATTGCACTCGTCCCGGCCTCCggcccccccggccc	hsa-miR-92b-3p	TATTGCACTCGTCCCGGCCTCC	3'	Yes	gp1a	...(((.....(((((..(((.((((.(((((..(((((((.((((((((((((.............))))))))))))))))))).))))).))))))).))))))))	106	75.2	-68.7	11	13	0	9.99426	10.9967	0	middle
61	82	hsa-miR-92a-3p	TATTGCACTTGTCCCGGCCTGT	22	chr13	+	91351299	91351405	gggaaactcaaacccctttctacacaggttgggatcggttgcaatgctgtgtttctgtatggTATTGCACTTGTCCCGGCCTGTtgagtttggtggggattgtgacc	30	hsa-mir-92a-1,ptr-mir-92-1,ggo-mir-92-1,ppa-mir-92a-1,mml-mir-92a-1,age-mir-92-1,lla-mir-92-1,sla-mir-92-1,lca-mir-92-1,bta-mir-92a-1,ppy-mir-92-1,cja-mir-92a-2,nle-mir-92a-2,oga-mir-92a-2,mmr-mir-92a,dma-mir-92a-1,sbo-mir-92a-2,cfa-mir-92a-1,cpo-mir-92a-1,pal-mir-92a-2,mmu-mir-92a-1,eca-mir-92a,mdo-mir-92a-1,efu-mir-92c,rno-mir-92a-1,ssc-mir-92a-1,ocu-mir-92a-1,chi-mir-92a,cgr-mir-92a,tch-mir-92…	hsa-mir-92a-1	ctttctacacAGGTTGGGATCGGTTGCAATGCTgtgtttctgtatggTATTGCACTTGTCCCGGCCTGTtgagtttgg	hsa-miR-92a-3p	TATTGCACTTGTCCCGGCCTGT	3'	Yes	gp1a	((....))(((.((((...((..(((((..(((((..(.((((((((..((......))..)))))))))..)))))..)))))..))......)))).))).....	94	50.5	-44.4	1024.5	1100	877	930.829	930.489	1170.71	high
62	83	hsa-miR-92a-3p	TATTGCACTTGTCCCGGCCTGT	22	X	-	134169531	134169619	tgcccattcatccctgggtggggatttgttgcattacttgtgttctatataaagTATTGCACTTGTCCCGGCCTGTggaagaaaggagg	31	hsa-mir-92a-2,ptr-mir-92-2,ppy-mir-92-2,ggo-mir-92-2,ppa-mir-92a-2,mml-mir-92a-2,mne-mir-92,age-mir-92-2,lla-mir-92-2,sla-mir-92-2,cja-mir-92a-1,nle-mir-92a-1,oga-mir-92a-1,sbo-mir-92a-1,mmr-mir-92b,dma-mir-92a-2,lca-mir-92-2,mmu-mir-92a-2,bta-mir-92a-2,eca-mir-92a-2,mdo-mir-92a-2,cfa-mir-92a-2,efu-mir-92a,rno-mir-92a-2,ssc-mir-92a-2,cpo-mir-92a-2,pal-mir-92a-1,dno-mir-92a-2,ocu-mir-92a-2,chi-mir…	hsa-mir-92a-2	tcatccctGGGTGGGGATTTGTTGCATTACttgtgttctatataaagTATTGCACTTGTCCCGGCCTGTggaaga	hsa-miR-92a-3p	TATTGCACTTGTCCCGGCCTGT	3'	Yes	gp1a	...((.(((.(((..(((..(((((..(.((((.(((((((((...)))))).))).)))))..)))))..)))..))).))).))...	83	47.2	-32.7	1024.5	1100	877	930.829	930.489	1170.71	high
63	84	hsa-miR-93-5p	CAAAGTGCTGTTCGTGCAGGTAG	23	chr7	-	100093764	100093851	agtcctgggggctcCAAAGTGCTGTTCGTGCAGGTAGtgtgattacccaacctactgctgagctagcacttcccgagcccccgggaca	28	hsa-mir-93,sla-mir-93,ptr-mir-93,ppy-mir-93,ggo-mir-93,ppa-mir-93,mml-mir-93,mne-mir-93,cja-mir-93,nle-mir-93,oga-mir-93,dma-mir-93,cfa-mir-93,pal-mir-93,age-mir-93,lla-mir-93,mmu-mir-93,bta-mir-93,eca-mir-93,mdo-mir-93,efu-mir-93,rno-mir-93,cpo-mir-93,dno-mir-93,ocu-mir-93,tch-mir-93,chi-mir-93,cgr-mir-93,	hsa-mir-93	ctgggggctcCAAAGTGCTGTTCGTGCAGGTAGtgtgattacccaacctACTGCTGAGCTAGCACTTCCCGagcccccgg	hsa-miR-93-5p	CAAAGTGCTGTTCGTGCAGGTAG	5'	Yes	gp1a	.(((((((((((((..((((((((((((.((((.(((..((......))..)))))))))))).)))))))...))))))))))))).	86	59.1	-54.4	274	291	173	248.948	246.157	230.938	middle
64	85	hsa-miR-96-5p	TTTGGCACTAGCACATTTTTGCT	23	chr7	-	129774685	129774784	ccagtgccatctgcttggccgatTTTGGCACTAGCACATTTTTGCTtgtgtctctccgctctgagcaatcatgtgcagtgccaatatgggaaaagcagga	20	hsa-mir-96,ptr-mir-96,ppy-mir-96,ggo-mir-96,ppa-mir-96,mml-mir-96,mne-mir-96,eca-mir-96,cja-mir-96,sla-mir-96,mmu-mir-96,bta-mir-96,cfa-mir-96,rno-mir-96,ssc-mir-96,cpo-mir-96,pal-mir-96,dno-mir-96,ocu-mir-96,chi-mir-96,	hsa-mir-96	tggccgatTTTGGCACTAGCACATTTTTGCTtgtgtctctccgctctgagcAATCATGTGCAGTGCCAATATGggaaa	hsa-miR-96-5p	TTTGGCACTAGCACATTTTTGCT	5'	Yes	gp1a	.........(((((((..((.((.((((((((.((((((..(((((((((......)))...))))))..)))))))))))))).)).))..))))))).	90	50	-45.8	0	12	11	0	10.1508	14.6839	middle
65	86	hsa-miR-98-5p	TGAGGTAGTAAGTTGTATTGTT	22	X	-	53556223	53556341	aggattctgctcatgccagggTGAGGTAGTAAGTTGTATTGTTgtggggtagggatattaggccccaattagaagataactatacaacttactactttccctggtgtgtggcatattca	25	hsa-mir-98,ptr-mir-98,ppy-mir-98,ggo-mir-98,ppa-mir-98,mml-mir-98,age-mir-98,cja-mir-98,nle-mir-98,oga-mir-98,dma-mir-98,mmr-mir-98,mmu-mir-98,bta-mir-98,eca-mir-98,cfa-mir-98,rno-mir-98,ssc-mir-98,cpo-mir-98,pal-mir-98,dno-mir-98,ocu-mir-98,chi-mir-98,cgr-mir-98,tch-mir-98,	hsa-mir-98	aggattctgctcatgccagggTGAGGTAGTAAGTTGTATTGTTgtggggtagggatattaggccccaattagaagataaCTATACAACTTACTACTTTCCCtggtgtgtggcatattca	hsa-miR-98-5p	TGAGGTAGTAAGTTGTATTGTT	5'	Yes	gp1a	.((((..((((((..((((((.(((((((((((((((((.((((((((((...........)))))).........)))).)))))))))))))))))))))))..)).)))).)))).	117	42.9	-56.7	132	152	98	119.931	128.577	130.821	middle
66	87	hsa-miR-99a-5p_R-1	AACCCGTAGATCCGATCTTGT	21	chr21	+	16539085	16539174	gttgcccattggcataAACCCGTAGATCCGATCTTGTggtgaagtggaccgcacaagctcgcttctatgggtctgtgtcagtgtggtaat	28	hsa-mir-99a,ptr-mir-99a,ggo-mir-99a,ppa-mir-99a,mml-mir-99a,mne-mir-99a,lla-mir-99a,bta-mir-99a,chi-mir-99a,oar-mir-99a,ppy-mir-99a,cja-mir-99,nle-mir-99a,oga-mir-99a,sbo-mir-99a,dno-mir-99a,ocu-mir-99a,mmr-mir-99a,mmu-mir-99a,eca-mir-99a-2,cfa-mir-99a-1,efu-mir-99a,rno-mir-99a,ssc-mir-99a,cpo-mir-99a,pal-mir-99a,cgr-mir-99a,tch-mir-99a,	hsa-mir-99a	cccattggcataAACCCGTAGATCCGATCTTGTGgtgaagtggaccgcaCAAGCTCGCTTCTATGGGTCTGtgtcagtgtg	hsa-miR-99a-5p	AACCCGTAGATCCGATCTTGTG	5'	Diff	gp1a	((((((((((((((((.(((((((((..(((.((((((.((........)))))))).)))..))))))))).)))))))))).))))))	90	51.1	-46.8	207.5	397.5	98	188.528	336.245	130.821	high
67	88	hsa-miR-99b-5p	CACCCGTAGAACCGACCTTGCG	22	chr19	+	51692608	51692687	tcctggcaccCACCCGTAGAACCGACCTTGCGgggccttcgccgcacaCAAGCTCGTGTCTGTGGGTCCGTgtcgggggc	16	hsa-mir-99b,mml-mir-99b,mmu-mir-99b,bta-mir-99b,eca-mir-99b,rno-mir-99b,ssc-mir-99b,chi-mir-99b,cgr-mir-99b,ptr-mir-99b,oga-mir-99b,cfa-mir-99b,efu-mir-99b,cpo-mir-99b,pal-mir-99b,tch-mir-99b,	hsa-mir-99b	ggcaccCACCCGTAGAACCGACCTTGCGgggccttcgccgcacaCAAGCTCGTGTCTGTGGGTCCGtgtc	hsa-miR-99b-5p	CACCCGTAGAACCGACCTTGCG	5'	Yes	gp1a	(((((((((..((((..(((..(((.(((((((((...)).)))))....)).)))..)))..))))..)))))))))..	78	68.8	-37.4	238	332	132	216.239	280.838	176.207	middle
67	89	hsa-miR-99b-3p_R+1	CAAGCTCGTGTCTGTGGGTCCGT	23	chr19	+	51692608	51692687	tcctggcaccCACCCGTAGAACCGACCTTGCGgggccttcgccgcacaCAAGCTCGTGTCTGTGGGTCCGTgtcgggggc	16	hsa-mir-99b,mml-mir-99b,mmu-mir-99b,bta-mir-99b,eca-mir-99b,rno-mir-99b,ssc-mir-99b,chi-mir-99b,cgr-mir-99b,ptr-mir-99b,oga-mir-99b,cfa-mir-99b,efu-mir-99b,cpo-mir-99b,pal-mir-99b,tch-mir-99b,	hsa-mir-99b	ggcaccCACCCGTAGAACCGACCTTGCGgggccttcgccgcacaCAAGCTCGTGTCTGTGGGTCCGtgtc	hsa-miR-99b-3p	CAAGCTCGTGTCTGTGGGTCCG	3'	Diff	gp1a	(((((((((..((((..(((..(((.(((((((((...)).)))))....)).)))..)))..))))..)))))))))..	78	68.8	-37.4	11	0	0	9.99426	0	0	low
68	90	hsa-miR-100-5p	AACCCGTAGATCCGAACTTGTG	22	chr11	-	122152229	122152311	aggcctgttgccacaAACCCGTAGATCCGAACTTGTGgtattagtccgcacaagcttgtatctataggtatgtgtctgttagg	27	hsa-mir-100,ptr-mir-100,ggo-mir-100,ppa-mir-100,ppy-mir-100,mml-mir-100,cja-mir-100,nle-mir-100,mmr-mir-100,dma-mir-100,age-mir-100,lla-mir-100,sbo-mir-100,sla-mir-100,mmu-mir-100,bta-mir-100,eca-mir-100,mdo-mir-100,rno-mir-100,ssc-mir-100,cpo-mir-100,pal-mir-100,dno-mir-100,ocu-mir-100,chi-mir-100,cgr-mir-100,tch-mir-100,	hsa-mir-100	cctgttgccacaAACCCGTAGATCCGAACTTGTGgtattagtccgcaCAAGCTTGTATCTATAGGTATGtgtctgttagg	hsa-miR-100-5p	AACCCGTAGATCCGAACTTGTG	5'	Yes	gp1a	...((((....((((.(((..(((((.(((.((((((...........)))))).))).)))))..))).)))).....))))	80	47	-26	563.5	568.5	409	511.979	480.894	545.976	high
69	91	hsa-miR-101-3p_R+1	TACAGTACTGTGATAACTGAAG	22	chr1	-	65058430	65058512	aggctgccctggctcagttatcacagtgctgatgctgtctattctaaaggTACAGTACTGTGATAACTGAAGgatggcagcca	29	hsa-mir-101-1,age-mir-101,ptr-mir-101-1,ppy-mir-101-1,ggo-mir-101,ppa-mir-101,mml-mir-101-1,mne-mir-101,lla-mir-101,sla-mir-101,rno-mir-101a,cja-mir-101-1,ssc-mir-101-2,nle-mir-101-1,dma-mir-101-1,mmr-mir-101-1,mmu-mir-101a,bta-mir-101-1,chi-mir-101,eca-mir-101-1,mdo-mir-101-1,cfa-mir-101-1,pal-mir-101-2,efu-mir-101,cpo-mir-101-1,dno-mir-101-1,ocu-mir-101-1,cgr-mir-101a,tch-mir-101,	hsa-mir-101-1	tgccctggctCAGTTATCACAGTGCTGATGCTgtctattctaaaggTACAGTACTGTGATAACTGAAggatggca	hsa-miR-101-3p	TACAGTACTGTGATAACTGAA	3'	Diff	gp1a	.(((((((.....((((((((((((((((((.((((............)))))))))))))))))))))).....))))))).	81	48.2	-47.1	640	682	405.5	581.484	576.903	541.303	high
70	92	hsa-miR-101-3p_R+1	TACAGTACTGTGATAACTGAAG	22	chr9	+	4850288	4850381	tgagactgaactgtcctttttcggttatcatggtaccgatgctgtatatctgaaaggTACAGTACTGTGATAACTGAAGaatggtggtgccatc	20	hsa-mir-101-2,ppy-mir-101-2,mml-mir-101-2,bta-mir-101-2,ptr-mir-101-2,cja-mir-101-2,mmr-mir-101-2,dma-mir-101-2,nle-mir-101-2,mmu-mir-101b,eca-mir-101-2,mdo-mir-101-2,cfa-mir-101-2,pal-mir-101-1,rno-mir-101b,ssc-mir-101-1,cpo-mir-101-2,dno-mir-101-2,ocu-mir-101-2,cgr-mir-101b,	hsa-mir-101-2	actgtccttttTCGGTTATCATGGTACCGATGCtgtatatctgaaaggTACAGTACTGTGATAACTGAAgaatggtggt	hsa-miR-101-3p	TACAGTACTGTGATAACTGAA	3'	Diff	gp1a	......((.((..((.((((((((((((((..((......(((((((.........)))))))))..)))))))))))))).))..))..))..	86	42.6	-32	640	682	405.5	581.484	576.903	541.303	high
71	93	hsa-miR-103a-3p	AGCAGCATTGTACAGGGCTATGA	23	chr20	+	3917470	3917590	ccccacctcagcagagctgcgtctttgtgctttcagcttctttacagtgctgccttgtagcattcaggtcaAGCAGCATTGTACAGGGCTATGAaagaaccaagaatgggctgcccttggg	23	hsa-mir-103a-2,ppy-mir-103-2,mml-mir-103-2,ptr-mir-103-2,cja-mir-103a-1,oga-mir-103b,mmr-mir-103b,pal-mir-103b,dno-mir-103a-2,ocu-mir-103a-2,dma-mir-103b,mmu-mir-103-2,rno-mir-103-2,bta-mir-103-2,eca-mir-103,mdo-mir-103-2,cfa-mir-103-2,efu-mir-103b,ssc-mir-103-2,cpo-mir-103-2,chi-mir-103,cgr-mir-103,tch-mir-103a-2,	hsa-mir-103a-2	ttgtgctttcAGCTTCTTTACAGTGCTGCCTTGtagcattcaggtcaAGCAGCATTGTACAGGGCTATGAaagaacca	hsa-miR-103a-3p	AGCAGCATTGTACAGGGCTATGA	3'	Yes	gp1a	.((((.....((((..((...((((.((.((((((((.(((.(((((((((((((((.......))))....))))))))))).))))))..))))).)).))))..)).))))...))))	120	52.1	-42.9	1550.33	1228.5	1218	1408.58	1039.19	1625.91	high
72	94	hsa-miR-103a-3p	AGCAGCATTGTACAGGGCTATGA	23	chr5	-	168560892	168560977	ttcttactgccctcggcttctttacagtgctgccttgttgcatatggatcaAGCAGCATTGTACAGGGCTATGAaggcattgagac	28	hsa-mir-103a-1,ptr-mir-103-1,ppy-mir-103-1,ggo-mir-103,ppa-mir-103,mml-mir-103-1,mne-mir-103,age-mir-103,lla-mir-103,cja-mir-103a-2,nle-mir-103a,oga-mir-103a,mmr-mir-103a,cfa-mir-103-1,pal-mir-103a,tch-mir-103a-1,dma-mir-103a,mmu-mir-103-1,rno-mir-103-1,bta-mir-103-1,eca-mir-107a,mdo-mir-103-1,efu-mir-103a,ssc-mir-103-1,cpo-mir-103-1,dno-mir-103a-1,ocu-mir-103a-1,oar-mir-103,	hsa-mir-103a-1	tactgccctcGGCTTCTTTACAGTGCTGCCTTGttgcatatggatcaAGCAGCATTGTACAGGGCTATGAaggcattg	hsa-miR-103a-3p	AGCAGCATTGTACAGGGCTATGA	3'	Yes	gp1a	.(((((.((((.(((((.(((.(((((((((((.(((............)))))))))))))).))))))..)).)))).))))).	84	47.7	-34.6	1550.33	1228.5	1218	1408.58	1039.19	1625.91	high
73	95	hsa-miR-106b-5p	TAAAGTGCTGACAGTGCAGAT	21	chr7	-	100093991	100094074	cctgccggggcTAAAGTGCTGACAGTGCAGATagtggtcctctccgtgctaCCGCACTGTGGGTACTTGCTGCtccagcagggc	27	hsa-mir-106b,ptr-mir-106b,ppy-mir-106b,ggo-mir-106b,ppa-mir-106b,age-mir-106b,sla-mir-106b,mml-mir-106b,mne-mir-106b,cja-mir-106b,dno-mir-106b,nle-mir-106b,oga-mir-106b,dma-mir-106b,lla-mir-106b,mmu-mir-106b,rno-mir-106b,bta-mir-106b,eca-mir-106b,cfa-mir-106b,efu-mir-106,cpo-mir-106b,pal-mir-106b,ocu-mir-106b,chi-mir-106b,oar-mir-106b,cgr-mir-106b,	hsa-mir-106b	cctgccggggcTAAAGTGCTGACAGTGCAGATagtggtcctctccgtgctaCCGCACTGTGGGTACTTGCTGCtccagcagg	hsa-miR-106b-5p	TAAAGTGCTGACAGTGCAGAT	5'	Yes	gp1a	(((((.(((((..((((((..(((((((...((((((......))..))))..)))))))..))))))...))))).)))))..	82	61.9	-43	85	55	38	77.2283	46.5244	50.7263	middle
73	96	hsa-miR-106b-3p	CCGCACTGTGGGTACTTGCTGC	22	chr7	-	100093991	100094074	cctgccggggcTAAAGTGCTGACAGTGCAGATagtggtcctctccgtgctaCCGCACTGTGGGTACTTGCTGCtccagcagggc	27	hsa-mir-106b,ptr-mir-106b,ppy-mir-106b,ggo-mir-106b,ppa-mir-106b,age-mir-106b,sla-mir-106b,mml-mir-106b,mne-mir-106b,cja-mir-106b,dno-mir-106b,nle-mir-106b,oga-mir-106b,dma-mir-106b,lla-mir-106b,mmu-mir-106b,rno-mir-106b,bta-mir-106b,eca-mir-106b,cfa-mir-106b,efu-mir-106,cpo-mir-106b,pal-mir-106b,ocu-mir-106b,chi-mir-106b,oar-mir-106b,cgr-mir-106b,	hsa-mir-106b	cctgccggggcTAAAGTGCTGACAGTGCAGATagtggtcctctccgtgctaCCGCACTGTGGGTACTTGCTGCtccagcagg	hsa-miR-106b-3p	CCGCACTGTGGGTACTTGCTGC	3'	Yes	gp1a	(((((.(((((..((((((..(((((((...((((((......))..))))..)))))))..))))))...))))).)))))..	82	61.9	-43	44	58	20	39.977	49.0621	26.6981	middle
74	97	hsa-miR-106a-5p_1ss1AC	CAAAGTGCTTACAGTGCAGGTAG	23	X	-	134170198	134170278	ccttggccatgtAAAAGTGCTTACAGTGCAGGTAGctttttgagatctactgcaatgtaagcacttcttacattaccatgg	18	hsa-mir-106a,ptr-mir-106a,ppy-mir-106a,ggo-mir-106a,ppa-mir-106a,mml-mir-106a,mne-mir-106a,age-mir-106a,sla-mir-106a,bta-mir-106a,chi-mir-106a,oar-mir-106a,eca-mir-106a,rno-mir-17-2,ssc-mir-106a,cpo-mir-106a,pal-mir-106a,ocu-mir-106a,	hsa-mir-106a	ccttggccatgtAAAAGTGCTTACAGTGCAGGTAGctttttgagatctaCTGCAATGTAAGCACTTCTTACattaccatgg	hsa-miR-106a-5p	AAAAGTGCTTACAGTGCAGGTAG	5'	Diff	gp1a	((.(((..(((((((((((((((((.(((((.(((.((.....)).)))))))).))))))))))).))))))..))).))	81	42	-34.7	155	125.5	82.5	140.828	106.16	110.13	middle
75	98	hsa-miR-107_R-2	AGCAGCATTGTACAGGGCTAT	21	chr10	-	89592743	89592829	ttctctctgctttcagcttctttacagtgttgccttgtggcatggagttcaAGCAGCATTGTACAGGGCTATcaaagcacagagagc	29	hsa-mir-107,ptr-mir-107,ppy-mir-107,ggo-mir-107,ppa-mir-107,mml-mir-107,mne-mir-107,lla-mir-107,bta-mir-107,eca-mir-107b,oar-mir-107,cja-mir-103a-3,nle-mir-107,oga-mir-107,mmr-mir-107,cfa-mir-107,pal-mir-107a,tch-mir-107,dma-mir-107,mmu-mir-107,mdo-mir-107,efu-mir-107,rno-mir-107,ssc-mir-107,chi-mir-107,cpo-mir-107,dno-mir-107,ocu-mir-107,cgr-mir-107,	hsa-mir-107	ctctctgctttcagcttctttacagtgttgccttgtggcatggagttcaAGCAGCATTGTACAGGGCTATCAaagcacaga	hsa-miR-107	AGCAGCATTGTACAGGGCTATCA	3'	Diff	gp1a	((((((.((((((.(((.(((.(((((((((((.(((............)))))))))))))).))))))...)))))).)))))).	86	47.1	-33.3	134.333	167	117	122.051	141.265	156.184	middle
76	99	hsa-miR-122-5p_R-1	TGGAGTGTGACAATGGTGTTT	21	chr18	+	58451068	58451176	gagtttccttagcagagctgTGGAGTGTGACAATGGTGTTTgtgtctaaactatcaaacgccattatcacactaaatagctactgctaggcaatccttccctcgataaa	20	hsa-mir-122,ppy-mir-122,ptr-mir-122,ggo-mir-122,mml-mir-122a,cja-mir-122,mmu-mir-122,bta-mir-122,ssc-mir-122,eca-mir-122,mdo-mir-122,cfa-mir-122,cpo-mir-122,ocu-mir-122,rno-mir-122,pal-mir-122,dno-mir-122,chi-mir-122,cgr-mir-122,tch-mir-122,	hsa-mir-122	ccttagcagagctgTGGAGTGTGACAATGGTGTTTGtgtctaaactatcaAACGCCATTATCACACTAAATAgctactgctaggc	hsa-miR-122-5p	TGGAGTGTGACAATGGTGTTTG	5'	Diff	gp1a	.......((((((((((((((..(((((((.(((((((((((............))))))))))).)))))))..)))))).))))))))...................	83	42.2	-45.9	96	141	104	87.2226	119.272	138.83	middle
77	100	hsa-miR-125b-5p	TCCCTGAGACCCTAACTTGTGA	22	chr21	+	16590237	16590325	accagacttttcctagTCCCTGAGACCCTAACTTGTGAggtattttagtaacatcACAAGTCAGGCTCTTGGGACCTAggcggagggga	28	hsa-mir-125b-2,ptr-mir-125b-2,ppy-mir-125b-2,ggo-mir-125b-2,mml-mir-125b-2,mne-mir-125b-2,age-mir-125b-2,lla-mir-125b-2,lca-mir-125b,ssc-mir-125b-2,cja-mir-125b,dma-mir-125b-2,pal-mir-125b-2,nle-mir-125b-2,sbo-mir-125b-2,cfa-mir-125b-2,dno-mir-125b-2,ocu-mir-125b-2,oga-mir-125b-2,mmu-mir-125b-2,bta-mir-125b-2,eca-mir-125b-2,mdo-mir-125b-1,efu-mir-125b,rno-mir-125b-2,cpo-mir-125b-2,chi-mir-125b,cg…	hsa-mir-125b-2	accagacttttcctagTCCCTGAGACCCTAACTTGTGAggtattttagtaacaTCACAAGTCAGGCTCTTGGGACctaggcggagggga	hsa-miR-125b-5p	TCCCTGAGACCCTAACTTGTGA	5'	Yes	gp1a	.((...(((..(((((..((..(((.(((.((((((((..(((....)))...)))))))).))).)))..))..)))))..)))))..	86	49.4	-37.9	233.5	282.5	158	212.151	238.966	210.915	middle
77	101	hsa-miR-125b-2-3p_L-2R+3	ACAAGTCAGGCTCTTGGGACCAA	23	chr21	+	16590237	16590325	accagacttttcctagTCCCTGAGACCCTAACTTGTGAggtattttagtaacatcACAAGTCAGGCTCTTGGGACCTAggcggagggga	28	hsa-mir-125b-2,ptr-mir-125b-2,ppy-mir-125b-2,ggo-mir-125b-2,mml-mir-125b-2,mne-mir-125b-2,age-mir-125b-2,lla-mir-125b-2,lca-mir-125b,ssc-mir-125b-2,cja-mir-125b,dma-mir-125b-2,pal-mir-125b-2,nle-mir-125b-2,sbo-mir-125b-2,cfa-mir-125b-2,dno-mir-125b-2,ocu-mir-125b-2,oga-mir-125b-2,mmu-mir-125b-2,bta-mir-125b-2,eca-mir-125b-2,mdo-mir-125b-1,efu-mir-125b,rno-mir-125b-2,cpo-mir-125b-2,chi-mir-125b,cg…	hsa-mir-125b-2	accagacttttcctagTCCCTGAGACCCTAACTTGTGAggtattttagtaacaTCACAAGTCAGGCTCTTGGGACctaggcggagggga	hsa-miR-125b-2-3p	TCACAAGTCAGGCTCTTGGGAC	3'	Diff	gp1a	.((...(((..(((((..((..(((.(((.((((((((..(((....)))...)))))))).))).)))..))..)))))..)))))..	86	49.4	-37.9	8	5	0	7.26855	4.2295	0	low
78	102	hsa-miR-125a-5p_R-2	TCCCTGAGACCCTTTAACCTGT	22	chr19	+	51693248	51693355	ccatgttgccagtctctaggTCCCTGAGACCCTTTAACCTGTgaggacatccagggtcACAGGTGAGGTTCTTGGGAGCctggcgtctggcccaaccacacacctggg	22	hsa-mir-125a,ppy-mir-125a,ptr-mir-125a,ggo-mir-125a,ppa-mir-125a,mml-mir-125a,cja-mir-125a,nle-mir-125a,sbo-mir-125a,cfa-mir-125a,cpo-mir-125a,oga-mir-125a,dma-mir-125a,mmu-mir-125a,bta-mir-125a,eca-mir-125a,rno-mir-125a,ssc-mir-125a,pal-mir-125a,chi-mir-125a,cgr-mir-125a,tch-mir-125a,	hsa-mir-125a	tgccagtctctaggTCCCTGAGACCCTTTAACCTGTGAggacatccagggtcACAGGTGAGGTTCTTGGGAGCCtggcgtctggcc	hsa-miR-125a-5p	TCCCTGAGACCCTTTAACCTGTGA	5'	Diff	gp1a	.......(((((...(((((..((..(((.((((..((((((((((....))....)))))))))))).)))..))..)))))...)))))....(((......))).	84	59.3	-47.9	585	689	379	531.513	582.824	505.928	high
78	103	hsa-miR-125a-3p_R-1	ACAGGTGAGGTTCTTGGGAGC	21	chr19	+	51693248	51693355	ccatgttgccagtctctaggTCCCTGAGACCCTTTAACCTGTgaggacatccagggtcACAGGTGAGGTTCTTGGGAGCctggcgtctggcccaaccacacacctggg	22	hsa-mir-125a,ppy-mir-125a,ptr-mir-125a,ggo-mir-125a,ppa-mir-125a,mml-mir-125a,cja-mir-125a,nle-mir-125a,sbo-mir-125a,cfa-mir-125a,cpo-mir-125a,oga-mir-125a,dma-mir-125a,mmu-mir-125a,bta-mir-125a,eca-mir-125a,rno-mir-125a,ssc-mir-125a,pal-mir-125a,chi-mir-125a,cgr-mir-125a,tch-mir-125a,	hsa-mir-125a	tgccagtctctaggTCCCTGAGACCCTTTAACCTGTGAggacatccagggtcACAGGTGAGGTTCTTGGGAGCCtggcgtctggcc	hsa-miR-125a-3p	ACAGGTGAGGTTCTTGGGAGCC	3'	Diff	gp1a	.......(((((...(((((..((..(((.((((..((((((((((....))....)))))))))))).)))..))..)))))...)))))....(((......))).	84	59.3	-47.9	6	0	7	5.45141	0	9.34433	low
79	104	hsa-miR-125b-5p	TCCCTGAGACCCTAACTTGTGA	22	chr11	-	122099751	122099847	tgttgcgctcctctcagTCCCTGAGACCCTAACTTGTGAtgtttaccgtttaaatccACGGGTTAGGCTCTTGGGAGCtgcgagtcgtgcttttgca	30	hsa-mir-125b-1,ptr-mir-125b-1,ppy-mir-125b-1,ggo-mir-125b-1,mml-mir-125b-1,mne-mir-125b-1,age-mir-125b-1,lla-mir-125b-1,sla-mir-125b,ppa-mir-125b,cja-mir-125,nle-mir-125b-1,cfa-mir-125b-1,oga-mir-125b-1,mmr-mir-125a,sbo-mir-125b-1,cpo-mir-125b-1,dno-mir-125b-1,ocu-mir-125b-1,tch-mir-125b,dma-mir-125b-1,mmu-mir-125b-1,bta-mir-125b-1,oar-mir-125b,eca-mir-125b,mdo-mir-125b-2,rno-mir-125b-1,ssc-mir-1…	hsa-mir-125b-1	tgcgctcctctcagTCCCTGAGACCCTAACTTGTGAtgtttaccgtttaaatccACGGGTTAGGCTCTTGGGAGCTgcgagtcgtgct	hsa-miR-125b-5p	TCCCTGAGACCCTAACTTGTGA	5'	Yes	gp1a	....((((..(((.(((..((..(((.((((((..(((..(((((.....))))).)))..)))))).)))..))..))).)))..)))).......	86	51.5	-42	233.5	282.5	158	212.151	238.966	210.915	middle
79	105	hsa-miR-125b-1-3p_R-1	ACGGGTTAGGCTCTTGGGAGC	21	chr11	-	122099751	122099847	tgttgcgctcctctcagTCCCTGAGACCCTAACTTGTGAtgtttaccgtttaaatccACGGGTTAGGCTCTTGGGAGCtgcgagtcgtgcttttgca	30	hsa-mir-125b-1,ptr-mir-125b-1,ppy-mir-125b-1,ggo-mir-125b-1,mml-mir-125b-1,mne-mir-125b-1,age-mir-125b-1,lla-mir-125b-1,sla-mir-125b,ppa-mir-125b,cja-mir-125,nle-mir-125b-1,cfa-mir-125b-1,oga-mir-125b-1,mmr-mir-125a,sbo-mir-125b-1,cpo-mir-125b-1,dno-mir-125b-1,ocu-mir-125b-1,tch-mir-125b,dma-mir-125b-1,mmu-mir-125b-1,bta-mir-125b-1,oar-mir-125b,eca-mir-125b,mdo-mir-125b-2,rno-mir-125b-1,ssc-mir-1…	hsa-mir-125b-1	tgcgctcctctcagTCCCTGAGACCCTAACTTGTGAtgtttaccgtttaaatccACGGGTTAGGCTCTTGGGAGCTgcgagtcgtgct	hsa-miR-125b-1-3p	ACGGGTTAGGCTCTTGGGAGCT	3'	Diff	gp1a	....((((..(((.(((..((..(((.((((((..(((..(((((.....))))).)))..)))))).)))..))..))).)))..)))).......	86	51.5	-42	0	8	0	0	6.76719	0	low
80	106	hsa-miR-126-5p	CATTATTACTTTTGGTACGCG	21	chr9	+	136670597	136670693	gcctccgctggcgacgggaCATTATTACTTTTGGTACGCGctgtgacacttcaaacTCGTACCGTGAGTAATAATGCGccgtccacggcaccgcatc	19	hsa-mir-126,ptr-mir-126,ppy-mir-126,mml-mir-126,cja-mir-126,nle-mir-126,mmr-mir-126,cfa-mir-126,cpo-mir-126,mmu-mir-126a,bta-mir-126,eca-mir-126,mdo-mir-126,efu-mir-126,rno-mir-126a,ssc-mir-126,pal-mir-126,dno-mir-126,chi-mir-126,	hsa-mir-126	cgctggcgacgggaCATTATTACTTTTGGTACGCGctgtgacacttcaaacTCGTACCGTGAGTAATAATGCGccgtccacggca	hsa-miR-126-5p	CATTATTACTTTTGGTACGCG	5'	Yes	gp1a	((....((((..(((((..((((((((((..(((((((.....(((....)))....)))))))..))))))))))..)))))..))))...))...	94	55.7	-39.7	417	577	262	378.873	488.084	349.745	high
80	107	hsa-miR-126-3p	TCGTACCGTGAGTAATAATGCG	22	chr9	+	136670597	136670693	gcctccgctggcgacgggaCATTATTACTTTTGGTACGCGctgtgacacttcaaacTCGTACCGTGAGTAATAATGCGccgtccacggcaccgcatc	19	hsa-mir-126,ptr-mir-126,ppy-mir-126,mml-mir-126,cja-mir-126,nle-mir-126,mmr-mir-126,cfa-mir-126,cpo-mir-126,mmu-mir-126a,bta-mir-126,eca-mir-126,mdo-mir-126,efu-mir-126,rno-mir-126a,ssc-mir-126,pal-mir-126,dno-mir-126,chi-mir-126,	hsa-mir-126	cgctggcgacgggaCATTATTACTTTTGGTACGCGctgtgacacttcaaacTCGTACCGTGAGTAATAATGCGccgtccacggca	hsa-miR-126-3p	TCGTACCGTGAGTAATAATGCG	3'	Yes	gp1a	((....((((..(((((..((((((((((..(((((((.....(((....)))....)))))))..))))))))))..)))))..))))...))...	94	55.7	-39.7	967	1130	654	878.586	955.866	873.027	high
81	108	hsa-miR-127-3p	TCGGATCCGTCTGAGCTTGGCT	22	chr14	+	100882965	100883090	gtaaaaggtctcgctgtgatcactgtctccagcctgctgaagctcagagggctctgattcagaaagatcaTCGGATCCGTCTGAGCTTGGCTggtcggaagtctcatcatctgcttccttcgggtt	30	hsa-mir-127,ptr-mir-127,ppy-mir-127,age-mir-127,lla-mir-127,sla-mir-127,ggo-mir-127,ppa-mir-127,dma-mir-127,cpo-mir-127,pal-mir-127,dno-mir-127,ocu-mir-127,tch-mir-127,mml-mir-127,mne-mir-127,cja-mir-127,nle-mir-127,oga-mir-127,sbo-mir-127,cfa-mir-127,mmu-mir-127,eca-mir-127,cgr-mir-127,bta-mir-127,efu-mir-127,rno-mir-127,ssc-mir-127,chi-mir-127,oar-mir-127,	hsa-mir-127	tgtgatcactgtctccagcctgCTGAAGCTCAGAGGGCTCTGATtcagaaagatcaTCGGATCCGTCTGAGCTTGGCTggtcggaagtctcatcatc	hsa-miR-127-3p	TCGGATCCGTCTGAGCTTGGCT	3'	Yes	gp1a	............((.(((((.(((.(((((((((.....(((((((((.((.((((((((.....))..)))))).)).)))))))))))))))..))))))...)))))..))..((....))..	102	52.4	-45.7	57	93	78	51.7884	78.6686	104.122	middle
82	109	hsa-miR-128-3p	TCACAGTGAACCGGTCTCTTT	21	chr3	+	35744476	35744559	tgtgcagtgggaaggggggccgatacactgtacgagagtgagtagcaggtcTCACAGTGAACCGGTCTCTTTccctactgtgtc	19	hsa-mir-128-2,ppy-mir-128-2,mml-mir-128b,ptr-mir-128-2,cja-mir-128-2,nle-mir-128-2,oga-mir-128-2,mmr-mir-128,cfa-mir-128-2,cpo-mir-128-2,dno-mir-128-2,ocu-mir-128b,mmu-mir-128-2,bta-mir-128-2,eca-mir-128-1,mdo-mir-128a,efu-mir-128a,rno-mir-128-2,ssc-mir-128-2,	hsa-mir-128-2	tgtgcagtgggaagGGGGGCCGATACACTGTACGAGAgtgagtagcaggtcTCACAGTGAACCGGTCTCTTTccctactgtgtc	hsa-miR-128-3p	TCACAGTGAACCGGTCTCTTT	3'	Yes	gp1a	.(..(((((((.(..(((((((...((((((..((((.((.....))..))))))))))...)))))))..).)))))))..).	82	56	-37	115.5	94.5	59	104.94	79.9375	78.7593	middle
83	110	hsa-miR-128-3p	TCACAGTGAACCGGTCTCTTT	21	chr2	+	135665366	135665495	tttaatattttgcaataattggccttgttcctgagctgttggattcggggccgtagcactgtctgagaggtttacatttcTCACAGTGAACCGGTCTCTTTttcagctgcttcctggcttctttttactc	27	hsa-mir-128-1,ptr-mir-128-1,ppy-mir-128-1,ppa-mir-128,mml-mir-128a,age-mir-128,sla-mir-128,bta-mir-128-1,rno-mir-128-1,ssc-mir-128-1,ggo-mir-128,cja-mir-128-1,mmu-mir-128-1,eca-mir-128-2,nle-mir-128-1,oga-mir-128-1,mdo-mir-128b,cfa-mir-128-1,cpo-mir-128-1,pal-mir-128,dno-mir-128-1,ocu-mir-128a,tch-mir-128,efu-mir-128b,chi-mir-128,cgr-mir-128,sha-mir-128,	hsa-mir-128-1	tgagctgttggattCGGGGCCGTAGCACTGTCTGAGAggtttacatttcTCACAGTGAACCGGTCTCTTTttcagctgcttc	hsa-miR-128-3p	TCACAGTGAACCGGTCTCTTT	3'	Yes	gp1a	....................((((........((((.((((((...(((((((...((((((..((((..(....)..))))))))))...)))))))...)))))).))))...))))...........	99	43.8	-38.4	115.5	94.5	59	104.94	79.9375	78.7593	middle
84	111	hsa-miR-130b-5p_R+1	ACTCTTTCCCTGTTGCACTACT	22	chr22	+	21653284	21653395	ccctgggggaggcactggcaggcctgcccgacACTCTTTCCCTGTTGCACTACTataggccgctgggaagCAGTGCAATGATGAAAGGGCATcggtcaggtccagcctgcta	16	hsa-mir-130b,ptr-mir-130b,ppy-mir-130b,ggo-mir-130b,mml-mir-130b,cja-mir-130b,bta-mir-130b,eca-mir-130b,cfa-mir-130b,dno-mir-130b,rno-mir-130b,ssc-mir-130b,cpo-mir-130b,ocu-mir-130b,chi-mir-130b,cgr-mir-130b,	hsa-mir-130b	ggcctgcccgacACTCTTTCCCTGTTGCACTACtataggccgctgggaagCAGTGCAATGATGAAAGGGCATcggtcaggtc	hsa-miR-130b-5p	ACTCTTTCCCTGTTGCACTAC	5'	Diff	gp1a	((....))..((((..(((.((((((.((((..(((((((...((((((((..........(((....)))))))))))...)))))))..)))).))))))..))))))).	101	60.7	-46.2	10	6	12	9.08569	5.07539	16.0188	middle
84	112	hsa-miR-130b-3p	CAGTGCAATGATGAAAGGGCAT	22	chr22	+	21653284	21653395	ccctgggggaggcactggcaggcctgcccgacACTCTTTCCCTGTTGCACTACTataggccgctgggaagCAGTGCAATGATGAAAGGGCATcggtcaggtccagcctgcta	16	hsa-mir-130b,ptr-mir-130b,ppy-mir-130b,ggo-mir-130b,mml-mir-130b,cja-mir-130b,bta-mir-130b,eca-mir-130b,cfa-mir-130b,dno-mir-130b,rno-mir-130b,ssc-mir-130b,cpo-mir-130b,ocu-mir-130b,chi-mir-130b,cgr-mir-130b,	hsa-mir-130b	ggcctgcccgacACTCTTTCCCTGTTGCACTACtataggccgctgggaagCAGTGCAATGATGAAAGGGCATcggtcaggtc	hsa-miR-130b-3p	CAGTGCAATGATGAAAGGGCAT	3'	Yes	gp1a	((....))..((((..(((.((((((.((((..(((((((...((((((((..........(((....)))))))))))...)))))))..)))).))))))..))))))).	101	60.7	-46.2	5	6	15	4.54284	5.07539	20.0236	middle
85	113	hsa-miR-130a-3p	CAGTGCAATGTTAAAAGGGCAT	22	chr11	+	57641198	57641286	tgctgctggccagagctcttttcacattgtgctactgtctgcacctgtcactagCAGTGCAATGTTAAAAGGGCATtggccgtgtagtg	25	hsa-mir-130a,ppy-mir-130a,ggo-mir-130a,ppa-mir-130a,mne-mir-130a,ptr-mir-130a,mml-mir-130a,cja-mir-130a,mmr-mir-130a,nle-mir-130a,dma-mir-130a,oga-mir-130a,mmu-mir-130a,bta-mir-130a,eca-mir-130a,cfa-mir-130a,pal-mir-130,efu-mir-130,rno-mir-130a,ssc-mir-130a,cpo-mir-130a,dno-mir-130a,chi-mir-130a,cgr-mir-130a,tch-mir-130a,	hsa-mir-130a	tgctgctggccagaGCTCTTTTCACATTGTGCTACTgtctgcacctgtcactagCAGTGCAATGTTAAAAGGGCATtggccgtgtagtg	hsa-miR-130a-3p	CAGTGCAATGTTAAAAGGGCAT	3'	Yes	gp1a	.(((((((((((..((((((((.((((((..((.(((...((....))...))).))..)))))).))))))))..)))))).))))).	87	50.6	-41.4	36	54	53	32.7085	45.6785	70.7499	middle
86	114	hsa-miR-132-3p	TAACAGTCTACAGCCATGGTCG	22	chr17	-	2049908	2050008	ccgcccccgcgtctccagggcaaccgtggctttcgattgttactgtgggaactggaggTAACAGTCTACAGCCATGGTCGccccgcagcacgcccacgcgc	19	hsa-mir-132,ppy-mir-132,mml-mir-132,cja-mir-132,nle-mir-132,oga-mir-132,mmr-mir-132,cpo-mir-132,pal-mir-132,mmu-mir-132,bta-mir-132,eca-mir-132,mdo-mir-132,cfa-mir-132,efu-mir-132,ssc-mir-132,rno-mir-132,dno-mir-132,cgr-mir-132,	hsa-mir-132	ccgcccccgcgtctccagggcaACCGTGGCTTTCGATTGTTACTgtgggaactggaggTAACAGTCTACAGCCATGGTCGccccgcagcacgcccacgcgc	hsa-miR-132-3p	TAACAGTCTACAGCCATGGTCG	3'	Yes	gp1a	.(((....((((((...((((.(((((((((...((((((((((............))))))))))...))))))))).))))...)).))))....))).	99	65.3	-44.9	23	26	18	20.8971	21.9934	24.0283	middle
87	115	hsa-miR-133a-3p_R+1	TTTGGTCCCCTTCAACCAGCTGT	23	chr18	-	21825698	21825785	acaatgctttgctagagctggtaaaatggaaccaaatcgcctcttcaatggaTTTGGTCCCCTTCAACCAGCTGTagctatgcattga	25	hsa-mir-133a-1,ptr-mir-133a-1,ppy-mir-133a,ggo-mir-133a,ppa-mir-133a,mml-mir-133a,mne-mir-133a,age-mir-133a,lla-mir-133a,sla-mir-133a,cja-mir-133a-1,mmu-mir-133a-1,bta-mir-133a-2,cfa-mir-133a,eca-mir-133a,mdo-mir-133a-1,mdo-mir-133a-2,efu-mir-133-2,rno-mir-133a,ssc-mir-133a-2,cpo-mir-133a-2,pal-mir-133a-2,ocu-mir-133a,dno-mir-133a-2,dno-mir-133a-1,	hsa-mir-133a-1	acaatgctttgctagAGCTGGTAAAATGGAACCAAATcgcctcttcaatggaTTTGGTCCCCTTCAACCAGCTGtagctatgcattga	hsa-miR-133a-3p	TTTGGTCCCCTTCAACCAGCTG	3'	Diff	gp1a	.((((((...((((.(((((((..((.((.((((((((............)))))))).)).))..))))))).))))...)))))).	86	44.3	-40	6.5	3	8.5	5.9057	2.5377	11.3467	middle
88	116	hsa-miR-133a-3p_R+1	TTTGGTCCCCTTCAACCAGCTGT	23	chr20	+	62564899	62565024	gttcctcggatctgggagccaaatgctttgctagagctggtaaaatggaaccaaatcgactgtccaatggaTTTGGTCCCCTTCAACCAGCTGTagctgtgcattgatggcgccgtgcggcccggc	15	hsa-mir-133a-2,ppy-mir-133c,mml-mir-133c,ptr-mir-133a-2,cja-mir-133a-2,mmu-mir-133a-2,bta-mir-133a-1,eca-mir-133a-2,cfa-mir-133c,efu-mir-133-1,ssc-mir-133a-1,cpo-mir-133a-1,pal-mir-133a-1,chi-mir-133a,oar-mir-133,	hsa-mir-133a-2	gggagccaaatgctttgctagAGCTGGTAAAATGGAACCAAATcgactgtccaatggaTTTGGTCCCCTTCAACCAGCTGtagctgtgcattgatggcgccg	hsa-miR-133a-3p	TTTGGTCCCCTTCAACCAGCTG	3'	Diff	gp1a	.....((((..(..((.(((((((((...((((.(((((((..((.((.((((((((............)))))))).)).))..))))))).))))...)))))..)))).))....)..)))).	120	54.8	-51.2	6.5	3	8.5	5.9057	2.5377	11.3467	middle
89	117	hsa-miR-134-5p	TGTGACTGGTTGACCAGAGGGG	22	chr14	+	101054684	101054764	gtccagggtgTGTGACTGGTTGACCAGAGGGGcatgcactgtgttcaccctgtgggccacctagtcaccaaccctcagcat	15	hsa-mir-134,ppy-mir-134,ppa-mir-134,mne-mir-134,ptr-mir-134,ggo-mir-134,mml-mir-134,cja-mir-134,mmu-mir-134,eca-mir-134,cfa-mir-134,rno-mir-134,cpo-mir-134,ocu-mir-134,cgr-mir-134,	hsa-mir-134	cagggtgTGTGACTGGTTGACCAGAGGGGcatgcactgtgttcacCCTGTGGGCCACCTAGTCACCAAccctc	hsa-miR-134-5p	TGTGACTGGTTGACCAGAGGGG	5'	Yes	gp1a	((..(((((..((((((((.((.(((.((((((((.....))))...)))).)))..)).))))))))..)))))..))..	79	59.3	-37.2	45	54	64	40.8856	45.6785	85.4338	middle
90	118	hsa-miR-135a-5p	TATGGCTTTTTATTCCTATGTGA	23	chr3	-	52294219	52294308	aggcctcgctgttctcTATGGCTTTTTATTCCTATGTGAttctactgctcactcatatagggattggagccgtggcgcacggcggggaca	19	hsa-mir-135a-1,ppy-mir-135a-1,mml-mir-135a-1,age-mir-135-1,lla-mir-135-1,ptr-mir-135a-1,ppa-mir-135-1,cja-mir-135,mmu-mir-135a-1,bta-mir-135a-1,chi-mir-135a,eca-mir-135a,cfa-mir-135a-1,ssc-mir-135-1,cpo-mir-135a-1,pal-mir-135-2,dno-mir-135a-1,ocu-mir-135a-1,tch-mir-135a,	hsa-mir-135a-1	aggcctcgctgttctcTATGGCTTTTTATTCCTATGTGAttctactgctcactcaTATAGGGATTGGAGCCGTGGCGcacggcggggaca	hsa-miR-135a-5p	TATGGCTTTTTATTCCTATGTGA	5'	Yes	gp1a	...(((((((((...(((((((((...((((((((((((.............))))))))))))..)))))))))...)))))))))...	84	52.2	-42.1	0	0	4.5	0	0	6.00707	low
91	119	hsa-miR-135a-5p	TATGGCTTTTTATTCCTATGTGA	23	chr12	+	97563810	97563939	caagataaattcactctagtgcttTATGGCTTTTTATTCCTATGTGAtagtaataaagtctcatgtagggatggaagccatgaaatacattgtgaaaaatcatcaactaagaaggggccatcagtataga	21	hsa-mir-135a-2,ptr-mir-135a-2,ppy-mir-135a-2,ggo-mir-135a,ppa-mir-135-2,mml-mir-135a-2,age-mir-135-2,bta-mir-135a-2,eca-mir-135a-2,ssc-mir-135-2,lla-mir-135-2,mmu-mir-135a-2,rno-mir-135a,mdo-mir-135a,cfa-mir-135a-2,efu-mir-135,cpo-mir-135a-2,dno-mir-135a-2,ocu-mir-135a-2,pal-mir-135-1,sha-mir-135a,	hsa-mir-135a-2	agataaattcactctagtgcttTATGGCTTTTTATTCCTATGTGAtagtaataaagtctcATGTAGGGATGGAAGCCATGAAatacattgtgaaaaatca	hsa-miR-135a-5p	TATGGCTTTTTATTCCTATGTGA	5'	Yes	gp1a	...(((...(((((....((..(((((((((.(..(((((((..(((.............)))..)))))))..))))))))))..))...)))))..))).....(((.....((....))....))).	98	34.6	-33.8	0	0	4.5	0	0	6.00707	low
92	120	hsa-miR-136-5p_R-1	ACTCCATTTGTTTTGATGATGG	22	chr14	+	100884697	100884788	ttggatgagccctcggaggACTCCATTTGTTTTGATGATGGattcttatgctcCATCATCGTCTCAAATGAGTCTtcagagggttctatcat	23	hsa-mir-136,ptr-mir-136,ppy-mir-136,ggo-mir-136,ppa-mir-136,mml-mir-136,nle-mir-136,oga-mir-136,mmr-mir-136,mmu-mir-136,bta-mir-136,eca-mir-136,cfa-mir-136,cpo-mir-136,pal-mir-136,tch-mir-136,efu-mir-136,rno-mir-136,ssc-mir-136,dno-mir-136,ocu-mir-136,chi-mir-136,oar-mir-136,	hsa-mir-136	tgagccctcggaggACTCCATTTGTTTTGATGATGGAttcttatgctcCATCATCGTCTCAAATGAGTCTtcagagggttct	hsa-miR-136-5p	ACTCCATTTGTTTTGATGATGGA	5'	Diff	gp1a	...(((((((((((.(((((((.((((((...((((((((((.........))))))))))...))))))))))))).)))))))).)))..	87	43.5	-48.1	11	9	0	9.99426	7.61309	0	low
92	121	hsa-miR-136-3p	CATCATCGTCTCAAATGAGTCT	22	chr14	+	100884697	100884788	ttggatgagccctcggaggACTCCATTTGTTTTGATGATGGattcttatgctcCATCATCGTCTCAAATGAGTCTtcagagggttctatcat	23	hsa-mir-136,ptr-mir-136,ppy-mir-136,ggo-mir-136,ppa-mir-136,mml-mir-136,nle-mir-136,oga-mir-136,mmr-mir-136,mmu-mir-136,bta-mir-136,eca-mir-136,cfa-mir-136,cpo-mir-136,pal-mir-136,tch-mir-136,efu-mir-136,rno-mir-136,ssc-mir-136,dno-mir-136,ocu-mir-136,chi-mir-136,oar-mir-136,	hsa-mir-136	tgagccctcggaggACTCCATTTGTTTTGATGATGGAttcttatgctcCATCATCGTCTCAAATGAGTCTtcagagggttct	hsa-miR-136-3p	CATCATCGTCTCAAATGAGTCT	3'	Yes	gp1a	...(((((((((((.(((((((.((((((...((((((((((.........))))))))))...))))))))))))).)))))))).)))..	87	43.5	-48.1	20	41	9	18.1714	34.6819	12.0141	middle
93	122	hsa-miR-139-5p	TCTACAGTGCACGTGTCTCCAGT	23	chr11	-	72615033	72615143	gggactggctcaggtgtatTCTACAGTGCACGTGTCTCCAGTgtggctcggaggctggagacgcggccctgttggagtaacaactgaagccggagtctgcgaagggtgggc	19	hsa-mir-139,ppy-mir-139,ppa-mir-139,mml-mir-139,lla-mir-139,mmu-mir-139,rno-mir-139,ssc-mir-139,ptr-mir-139,ggo-mir-139,cja-mir-139,bta-mir-139,eca-mir-139,efu-mir-139,pal-mir-139,dno-mir-139,ocu-mir-139,cgr-mir-139,tch-mir-139,	hsa-mir-139	gtgtatTCTACAGTGCACGTGTCTCCAGTgtggctcggaggcTGGAGACGCGGCCCTGTTGGAGTaac	hsa-miR-139-5p	TCTACAGTGCACGTGTCTCCAGT	5'	Yes	gp1a	....(((((((((.((((((((((((.((.((((((((((((...........)))))))))))))).)))).)))))).)).)))).))))).(((..(.....)..)))	89	61.3	-52.9	25	19	10	22.7142	16.0721	13.349	middle
94	123	hsa-miR-140-5p	CAGTGGTTTTACCCTATGGTAG	22	chr16	+	69933073	69933186	gccctgtgtgtgtctctctctgtgtcctgcCAGTGGTTTTACCCTATGGTAGgttacgtcatgctgttctACCACAGGGTAGAACCACGGACAggataccggggcaccctctgc	27	hsa-mir-140,ptr-mir-140,ppy-mir-140,mml-mir-140,ggo-mir-140,ppa-mir-140,nle-mir-140,oga-mir-140,mmr-mir-140,cpo-mir-140,dno-mir-140,ocu-mir-140,cja-mir-140,mne-mir-140,dma-mir-140,mmu-mir-140,mdo-mir-140,ssc-mir-140,bta-mir-140,eca-mir-140,cfa-mir-140,pal-mir-140,efu-mir-140,rno-mir-140,chi-mir-140,cgr-mir-140,tch-mir-140,	hsa-mir-140	tgtgtctctctctgtgtcctgcCAGTGGTTTTACCCTATGGTAGgttacgtcatgctgttcTACCACAGGGTAGAACCACGGacaggataccggggcacc	hsa-miR-140-5p	CAGTGGTTTTACCCTATGGTAG	5'	Yes	gp1a	((((((...............((((((((((.(((((((((((((.(((((((..(((......)))))))))).))))))))))))))).)))))))))))))).........	78	56.1	-56.1	23	20	11	20.8971	16.918	14.6839	middle
94	124	hsa-miR-140-3p_L-1R+3	ACCACAGGGTAGAACCACGGACT	23	chr16	+	69933073	69933186	gccctgtgtgtgtctctctctgtgtcctgcCAGTGGTTTTACCCTATGGTAGgttacgtcatgctgttctACCACAGGGTAGAACCACGGACAggataccggggcaccctctgc	27	hsa-mir-140,ptr-mir-140,ppy-mir-140,mml-mir-140,ggo-mir-140,ppa-mir-140,nle-mir-140,oga-mir-140,mmr-mir-140,cpo-mir-140,dno-mir-140,ocu-mir-140,cja-mir-140,mne-mir-140,dma-mir-140,mmu-mir-140,mdo-mir-140,ssc-mir-140,bta-mir-140,eca-mir-140,cfa-mir-140,pal-mir-140,efu-mir-140,rno-mir-140,chi-mir-140,cgr-mir-140,tch-mir-140,	hsa-mir-140	tgtgtctctctctgtgtcctgcCAGTGGTTTTACCCTATGGTAGgttacgtcatgctgttcTACCACAGGGTAGAACCACGGacaggataccggggcacc	hsa-miR-140-3p	TACCACAGGGTAGAACCACGG	3'	Diff	gp1a	((((((...............((((((((((.(((((((((((((.(((((((..(((......)))))))))).))))))))))))))).)))))))))))))).........	78	56.1	-56.1	369	291	204	335.262	246.157	272.32	high
95	125	hsa-miR-141-3p_R-1	TAACACTGTCTGGTAAAGATG	21	chr12	+	6964097	6964191	cggccggccctgggtccatcttccagtacagtgttggatggtctaattgtgaagctccTAACACTGTCTGGTAAAGATGgctcccgggtgggttc	20	hsa-mir-141,ptr-mir-141,ppy-mir-141,ggo-mir-141,ppa-mir-141,mml-mir-141,cja-mir-141,mmu-mir-141,bta-mir-141,chi-mir-141,eca-mir-141,cfa-mir-141,efu-mir-141,ssc-mir-141,cpo-mir-141,pal-mir-141,dno-mir-141,ocu-mir-141,cgr-mir-141,tch-mir-141,	hsa-mir-141	cggccggccctgggtcCATCTTCCAGTACAGTGTTGGAtggtctaattgtgaagctccTAACACTGTCTGGTAAAGATGGctcccgggtgggttc	hsa-miR-141-3p	TAACACTGTCTGGTAAAGATGG	3'	Diff	gp1a	..(((..(((.(((.(((((((((((.(((((((((((...((.......))...))).))))))))))))..)))))))..))))))..)))..	91	55.8	-46.6	0	11	5	0	9.30489	6.67452	low
96	126	hsa-miR-142-5p_L+2R-2	CCCATAAAGTAGAAAGCACTA	21	chr17	-	58331215	58331325	acagacagacagtgcagtcaCCCATAAAGTAGAAAGCACTActaacagcactggagggTGTAGTGTTTCCTACTTTATGGatgagtgtactgtgggcttcggagatcacgc	21	hsa-mir-142,ppy-mir-142,mml-mir-142,bta-mir-142,rno-mir-142,aja-mir-142,ptr-mir-142,ggo-mir-142,cja-mir-142,mmu-mir-142a,eca-mir-142,mdo-mir-142,cfa-mir-142,pal-mir-142,efu-mir-142,ssc-mir-142,cpo-mir-142,dno-mir-142,ocu-mir-142,cgr-mir-142,tch-mir-142,	hsa-mir-142	gacagtgcagtcaccCATAAAGTAGAAAGCACTACTaacagcactggagggTGTAGTGTTTCCTACTTTATGGAtgagtgtactgtg	hsa-miR-142-5p	CATAAAGTAGAAAGCACTACT	5'	Diff	gp1a	........((((((((.(((.(((((((((((.(((((((((...((....))......))))))))).))))))))))).))).))))))))..................	85	47.7	-44.4	506	425	308	459.736	359.507	411.15	high
96	127	hsa-miR-142-3p_R-1	TGTAGTGTTTCCTACTTTATGG	22	chr17	-	58331215	58331325	acagacagacagtgcagtcaCCCATAAAGTAGAAAGCACTActaacagcactggagggTGTAGTGTTTCCTACTTTATGGatgagtgtactgtgggcttcggagatcacgc	21	hsa-mir-142,ppy-mir-142,mml-mir-142,bta-mir-142,rno-mir-142,aja-mir-142,ptr-mir-142,ggo-mir-142,cja-mir-142,mmu-mir-142a,eca-mir-142,mdo-mir-142,cfa-mir-142,pal-mir-142,efu-mir-142,ssc-mir-142,cpo-mir-142,dno-mir-142,ocu-mir-142,cgr-mir-142,tch-mir-142,	hsa-mir-142	gacagtgcagtcaccCATAAAGTAGAAAGCACTACTaacagcactggagggTGTAGTGTTTCCTACTTTATGGAtgagtgtactgtg	hsa-miR-142-3p	TGTAGTGTTTCCTACTTTATGGA	3'	Diff	gp1a	........((((((((.(((.(((((((((((.(((((((((...((....))......))))))))).))))))))))).))).))))))))..................	85	47.7	-44.4	203	187	165	184.439	158.183	220.259	middle
97	128	hsa-miR-143-5p_R-1	GGTGCAGTGCTGCATCTCTGG	21	chr5	+	149428918	149429023	gcgcagcgccctgtctcccagcctgaGGTGCAGTGCTGCATCTCTGGtcagttgggagtcTGAGATGAAGCACTGTAGCTCAggaagagagaagttgttctgcagc	29	hsa-mir-143,ppy-mir-143,ggo-mir-143,lla-mir-143,ptr-mir-143,ppa-mir-143,mml-mir-143,cja-mir-143,mmu-mir-143,nle-mir-143,oga-mir-143,cfa-mir-143,cpo-mir-143,pal-mir-143,dno-mir-143,ocu-mir-143,dma-mir-143,sbo-mir-143,bta-mir-143,eca-mir-143,mdo-mir-143,efu-mir-143,rno-mir-143,ssc-mir-143,chi-mir-143,oar-mir-143,cgr-mir-143,tch-mir-143,aja-mir-143,	hsa-mir-143	gcgcagcgccctgtctcccagcctgaGGTGCAGTGCTGCATCTCTGGTcagttgggagtcTGAGATGAAGCACTGTAGCTCaggaagagagaagttgttctgcagc	hsa-miR-143-5p	GGTGCAGTGCTGCATCTCTGGT	5'	Diff	gp1a	((((((..(....((((....((((((.(((((((((.((((((.((((......)).)).)))))).))))))))).))))))....))))....)..)))).))	106	57.5	-50.9	8	7	12	7.26855	5.92129	16.0188	middle
97	129	hsa-miR-143-3p_R+1	TGAGATGAAGCACTGTAGCTCT	22	chr5	+	149428918	149429023	gcgcagcgccctgtctcccagcctgaGGTGCAGTGCTGCATCTCTGGtcagttgggagtcTGAGATGAAGCACTGTAGCTCAggaagagagaagttgttctgcagc	29	hsa-mir-143,ppy-mir-143,ggo-mir-143,lla-mir-143,ptr-mir-143,ppa-mir-143,mml-mir-143,cja-mir-143,mmu-mir-143,nle-mir-143,oga-mir-143,cfa-mir-143,cpo-mir-143,pal-mir-143,dno-mir-143,ocu-mir-143,dma-mir-143,sbo-mir-143,bta-mir-143,eca-mir-143,mdo-mir-143,efu-mir-143,rno-mir-143,ssc-mir-143,chi-mir-143,oar-mir-143,cgr-mir-143,tch-mir-143,aja-mir-143,	hsa-mir-143	gcgcagcgccctgtctcccagcctgaGGTGCAGTGCTGCATCTCTGGTcagttgggagtcTGAGATGAAGCACTGTAGCTCaggaagagagaagttgttctgcagc	hsa-miR-143-3p	TGAGATGAAGCACTGTAGCTC	3'	Diff	gp1a	((((((..(....((((....((((((.(((((((((.((((((.((((......)).)).)))))).))))))))).))))))....))))....)..)))).))	106	57.5	-50.9	1558	1543	690	1415.55	1305.22	921.083	high
98	130	hsa-miR-144-5p_L+2R-3	TGGGATATCATCATATACTGT	21	chr17	-	28861514	28861624	ccccagtggggccctggcTGGGATATCATCATATACTGTaagtttgcgatgagacacTACAGTATAGATGATGTACTagtccgggcacccccagctctggagcctgacaag	21	hsa-mir-144,ptr-mir-144,ppa-mir-144,ppy-mir-144,ggo-mir-144,mml-mir-144,mne-mir-144,cja-mir-144,mmu-mir-144,bta-mir-144,eca-mir-144,cfa-mir-144,rno-mir-144,ssc-mir-144,cpo-mir-144,pal-mir-144,dno-mir-144,ocu-mir-144,chi-mir-144,cgr-mir-144,aja-mir-144,	hsa-mir-144	tggggccctggctgGGATATCATCATATACTGTAAGtttgcgatgagacacTACAGTATAGATGATGTACTagtccgggcaccccc	hsa-miR-144-5p	GGATATCATCATATACTGTAAG	5'	Diff	gp1a	..((((((((((((.((((((.((((((((.(((((((((.((((......))))..))))))))))))))))).)))))).))))...))))...))))...........	98	53.2	-48.3	5	32	0	4.54284	27.0688	0	middle
98	131	hsa-miR-144-3p	TACAGTATAGATGATGTACT	20	chr17	-	28861514	28861624	ccccagtggggccctggcTGGGATATCATCATATACTGTaagtttgcgatgagacacTACAGTATAGATGATGTACTagtccgggcacccccagctctggagcctgacaag	21	hsa-mir-144,ptr-mir-144,ppa-mir-144,ppy-mir-144,ggo-mir-144,mml-mir-144,mne-mir-144,cja-mir-144,mmu-mir-144,bta-mir-144,eca-mir-144,cfa-mir-144,rno-mir-144,ssc-mir-144,cpo-mir-144,pal-mir-144,dno-mir-144,ocu-mir-144,chi-mir-144,cgr-mir-144,aja-mir-144,	hsa-mir-144	tggggccctggctgGGATATCATCATATACTGTAAGtttgcgatgagacacTACAGTATAGATGATGTACTagtccgggcaccccc	hsa-miR-144-3p	TACAGTATAGATGATGTACT	3'	Yes	gp1a	..((((((((((((.((((((.((((((((.(((((((((.((((......))))..))))))))))))))))).)))))).))))...))))...))))...........	98	53.2	-48.3	10	51	11	9.08569	43.1409	14.6839	middle
99	132	hsa-miR-145-5p	GTCCAGTTTTCCCAGGAATCCCT	23	chr5	+	149430646	149430733	caccttgtcctcacgGTCCAGTTTTCCCAGGAATCCCTtagatgctaagatggggATTCCTGGAAATACTGTTCTTgaggtcatggtt	25	hsa-mir-145,ptr-mir-145,ppy-mir-145,ggo-mir-145,bta-mir-145,chi-mir-145,aja-mir-145,ppa-mir-145,nle-mir-145,oga-mir-145,mmr-mir-145,pal-mir-145,ocu-mir-145,mml-mir-145,mne-mir-145,cja-mir-145,dma-mir-145,mmu-mir-145a,eca-mir-145,mdo-mir-145,cfa-mir-145,efu-mir-145,rno-mir-145,ssc-mir-145,cpo-mir-145,	hsa-mir-145	caccttgtcctcacgGTCCAGTTTTCCCAGGAATCCCTtagatgctaagatggGGATTCCTGGAAATACTGTTCTtgaggtcatggtt	hsa-miR-145-5p	GTCCAGTTTTCCCAGGAATCCCT	5'	Yes	gp1a	.(((.((.(((((.((..((((.((.((((((((((((.............)))))))))))).)).))))..))))))).)).))).	86	47.7	-41.8	38	24	10	34.5256	20.3016	13.349	middle
99	133	hsa-miR-145-3p_L-2R+1	ATTCCTGGAAATACTGTTCTT	21	chr5	+	149430646	149430733	caccttgtcctcacgGTCCAGTTTTCCCAGGAATCCCTtagatgctaagatggggATTCCTGGAAATACTGTTCTTgaggtcatggtt	25	hsa-mir-145,ptr-mir-145,ppy-mir-145,ggo-mir-145,bta-mir-145,chi-mir-145,aja-mir-145,ppa-mir-145,nle-mir-145,oga-mir-145,mmr-mir-145,pal-mir-145,ocu-mir-145,mml-mir-145,mne-mir-145,cja-mir-145,dma-mir-145,mmu-mir-145a,eca-mir-145,mdo-mir-145,cfa-mir-145,efu-mir-145,rno-mir-145,ssc-mir-145,cpo-mir-145,	hsa-mir-145	caccttgtcctcacgGTCCAGTTTTCCCAGGAATCCCTtagatgctaagatggGGATTCCTGGAAATACTGTTCTtgaggtcatggtt	hsa-miR-145-3p	GGATTCCTGGAAATACTGTTCT	3'	Diff	gp1a	.(((.((.(((((.((..((((.((.((((((((((((.............)))))))))))).)).))))..))))))).)).))).	86	47.7	-41.8	15	25	0	13.6285	21.1475	0	middle
100	134	hsa-miR-146a-5p	TGAGAACTGAATTCCATGGGTT	22	chr5	+	160485352	160485460	ccgatgtgtatcctcagcttTGAGAACTGAATTCCATGGGTTgtgtcagtgtcagacctctgaaattcagttcttcagctgggatatctctgtcatcgtgggcttgagg	17	hsa-mir-146a,ptr-mir-146a,ppy-mir-146a,ggo-mir-146a,mml-mir-146a,cja-mir-146a,nle-mir-146a,pal-mir-146a,mmr-mir-146a,eca-mir-146a,mdo-mir-146a,cfa-mir-146a,ssc-mir-146a,cpo-mir-146a,tch-mir-146a,ocu-mir-146a,cgr-mir-146a,	hsa-mir-146a	ccgatgtgtatcctcagcttTGAGAACTGAATTCCATGGGTTgtgtcagtgtcagaCCTCTGAAATTCAGTTCTTCAGctgggatatctctgtcatcgt	hsa-miR-146a-5p	TGAGAACTGAATTCCATGGGTT	5'	Yes	gp1a	.......((((((.(((((..((((((((((((.((..((((.((.......))))))..)).)))))))))))).)))))))))))(((.(((......)))..))).	80	47.7	-40	1939	2076	1981	1761.71	1756.09	2644.44	high
101	135	hsa-miR-146b-5p_R+1	TGAGAACTGAATTCCATAGGCTGT	24	chr10	+	102436494	102436609	ctgaaagaactttggccacctggcacTGAGAACTGAATTCCATAGGCTGTgagctctagcaatGCCCTGTGGACTCAGTTCTGGTgcccggcagtgctacaacatcaatgccaagg	20	hsa-mir-146b,ptr-mir-146b,ppy-mir-146b,ggo-mir-146b,ppa-mir-146b,mml-mir-146b,cja-mir-146b,nle-mir-146b,mmr-mir-146b,sbo-mir-146b,mmu-mir-146b,bta-mir-146b,eca-mir-146b,efu-mir-146,rno-mir-146b,ssc-mir-146b,pal-mir-146b,dno-mir-146b,chi-mir-146b,cgr-mir-146b,	hsa-mir-146b	cctggcacTGAGAACTGAATTCCATAGGCTGtgagctctagcaatGCCCTGTGGACTCAGTTCTGGTgcccgg	hsa-miR-146b-5p	TGAGAACTGAATTCCATAGGCTG	5'	Diff	gp1a	.........(((((((..((.((((((.((((((((..((((((((..((..((....)).))..)))))))).)))))))))))))).))..((......))......)))))))	73	52.6	-47.2	148	157	109	134.468	132.806	145.504	middle
101	136	hsa-miR-146b-3p	GCCCTGTGGACTCAGTTCTGGT	22	chr10	+	102436494	102436609	ctgaaagaactttggccacctggcacTGAGAACTGAATTCCATAGGCTGTgagctctagcaatGCCCTGTGGACTCAGTTCTGGTgcccggcagtgctacaacatcaatgccaagg	20	hsa-mir-146b,ptr-mir-146b,ppy-mir-146b,ggo-mir-146b,ppa-mir-146b,mml-mir-146b,cja-mir-146b,nle-mir-146b,mmr-mir-146b,sbo-mir-146b,mmu-mir-146b,bta-mir-146b,eca-mir-146b,efu-mir-146,rno-mir-146b,ssc-mir-146b,pal-mir-146b,dno-mir-146b,chi-mir-146b,cgr-mir-146b,	hsa-mir-146b	cctggcacTGAGAACTGAATTCCATAGGCTGtgagctctagcaatGCCCTGTGGACTCAGTTCTGGTgcccgg	hsa-miR-146b-3p	GCCCTGTGGACTCAGTTCTGGT	3'	Yes	gp1a	.........(((((((..((.((((((.((((((((..((((((((..((..((....)).))..)))))))).)))))))))))))).))..((......))......)))))))	73	52.6	-47.2	0	0	5	0	0	6.67452	low
102	137	hsa-miR-148b-3p	TCAGTGCATCACAGAACTTTGT	22	chr12	+	54337208	54337320	atcatttccaagcacgattagcatttgaggtgaagttctgttatacactcaggctgtggctctctgaaagTCAGTGCATCACAGAACTTTGTctcgaaagctttctagcagct	25	hsa-mir-148b,ppy-mir-148b,mml-mir-148b,ptr-mir-148b,ggo-mir-148b,ppa-mir-148b,nle-mir-148b,oga-mir-148b,mmr-mir-148b,cja-mir-148b,dma-mir-148b,mmu-mir-148b,bta-mir-148b,eca-mir-148b,cfa-mir-148b,cpo-mir-148b,pal-mir-148b,dno-mir-148b,ocu-mir-148b,tch-mir-148b,efu-mir-148,rno-mir-148b,ssc-mir-148b,chi-mir-148b,cgr-mir-148b,	hsa-mir-148b	caagcacgattagcatttgaggtgAAGTTCTGTTATACACTCAGGCtgtggctctctgaaagTCAGTGCATCACAGAACTTTGTctcgaaagctttcta	hsa-miR-148b-3p	TCAGTGCATCACAGAACTTTGT	3'	Yes	gp1a	...........((..((..(((.(((((((..(((((((((.((.((((..((((.............)))))))).)).)))))))))..))))))).))).))..))....	98	43.4	-36.4	914	690	658	830.432	583.67	878.367	high
103	138	hsa-miR-148a-5p	AAAGTTCTGAGACACTCCGACT	22	chr7	-	25949903	25950013	ggaggaagacagcacgtttggtcttttgaggcAAAGTTCTGAGACACTCCGACTctgagtatgatagaagTCAGTGCACTACAGAACTTTGTctctagaggctgtggtcgc	25	hsa-mir-148a,ppy-mir-148a,mml-mir-148a,ptr-mir-148a,ggo-mir-148a,ppa-mir-148a,nle-mir-148a,oga-mir-148a,cja-mir-148a,sbo-mir-148a,cpo-mir-148a,dno-mir-148a,tch-mir-148a,mmu-mir-148a,bta-mir-148a,eca-mir-148a,ssc-mir-148a,oar-mir-148a,mdo-mir-148,cfa-mir-148a,pal-mir-148a,rno-mir-148a,ocu-mir-148a,chi-mir-148a,cgr-mir-148a,	hsa-mir-148a	gaggcAAAGTTCTGAGACACTCCGACTctgagtatgatagaagTCAGTGCACTACAGAACTTTGTctc	hsa-miR-148a-5p	AAAGTTCTGAGACACTCCGACT	5'	Yes	gp1a	.......(((..(((....(((((((.((((((((((((((((.((((..(((((((.......))).))))))))..)).)))))))))))))).)))))))))))))..	102	48.6	-40.9	0	5	0	0	4.2295	0	low
103	139	hsa-miR-148a-3p	TCAGTGCACTACAGAACTTTGT	22	chr7	-	25949903	25950013	ggaggaagacagcacgtttggtcttttgaggcAAAGTTCTGAGACACTCCGACTctgagtatgatagaagTCAGTGCACTACAGAACTTTGTctctagaggctgtggtcgc	25	hsa-mir-148a,ppy-mir-148a,mml-mir-148a,ptr-mir-148a,ggo-mir-148a,ppa-mir-148a,nle-mir-148a,oga-mir-148a,cja-mir-148a,sbo-mir-148a,cpo-mir-148a,dno-mir-148a,tch-mir-148a,mmu-mir-148a,bta-mir-148a,eca-mir-148a,ssc-mir-148a,oar-mir-148a,mdo-mir-148,cfa-mir-148a,pal-mir-148a,rno-mir-148a,ocu-mir-148a,chi-mir-148a,cgr-mir-148a,	hsa-mir-148a	gaggcAAAGTTCTGAGACACTCCGACTctgagtatgatagaagTCAGTGCACTACAGAACTTTGTctc	hsa-miR-148a-3p	TCAGTGCACTACAGAACTTTGT	3'	Yes	gp1a	.......(((..(((....(((((((.((((((((((((((((.((((..(((((((.......))).))))))))..)).)))))))))))))).)))))))))))))..	102	48.6	-40.9	685	718	527	622.37	607.356	703.494	high
104	140	hsa-miR-149-5p	TCTGGCTCCGTGTCTTCACTCCC	23	chr2	+	240455995	240456103	tcccaggccggcgcccgagcTCTGGCTCCGTGTCTTCACTCCCgtgcttgtccgaggagggagggagggacgggggctgtgctggggcagctggaacaacgcaggtcgc	18	hsa-mir-149,ptr-mir-149,ppy-mir-149,ggo-mir-149,mml-mir-149,nle-mir-149-1,nle-mir-149-2,oga-mir-149,mmu-mir-149,bta-mir-149,eca-mir-149,cfa-mir-149,efu-mir-149,rno-mir-149,ssc-mir-149,cpo-mir-149,dno-mir-149,cgr-mir-149,	hsa-mir-149	gccggcgcccgagcTCTGGCTCCGTGTCTTCACTCCCgtgcttgtccgaggagggAGGGAGGGACGGGGGCTGTGCtggggcagctgga	hsa-miR-149-5p	TCTGGCTCCGTGTCTTCACTCCC	5'	Yes	gp1a	.......(((((((((.(((...((((((((..((((.(((((...(((....)))..)))))))))..)).))))))..))).)))).)))))...............	87	70.6	-51.1	0	6	0	0	5.07539	0	low
105	141	hsa-miR-150-5p	TCTCCCAACCCTTGTACCAGTG	22	chr19	-	49500762	49500873	ctcctctccccatggccctgTCTCCCAACCCTTGTACCAGTGctgggctcagaccctggtacaggcctgggggacagggacctggggaccccggcaccggcaggccccaagg	13	hsa-mir-150,ppy-mir-150,mml-mir-150,ptr-mir-150,ggo-mir-150,cja-mir-150,mmu-mir-150,eca-mir-150,cfa-mir-150,rno-mir-150,cpo-mir-150,dno-mir-150,cgr-mir-150,	hsa-mir-150	ctccccatggccctgTCTCCCAACCCTTGTACCAGTGctgggctcagaccCTGGTACAGGCCTGGGGGACAGggacctggggac	hsa-miR-150-5p	TCTCCCAACCCTTGTACCAGTG	5'	Yes	gp1a	..(((.((((((.((((((((((((((..(((.(((((((..(((....)))...))))))))))..)))))))))))).))))))))..(((....))).........)))	82	69.6	-61.9	19	29	8	17.2628	24.5311	10.6792	middle
106	142	hsa-miR-151b_R+2	TCGAGGAGCTCACAGTCTAG	20	chr14	-	100109419	100109514	acctctgatgtgtcagtctctcttcagggctcccgagacacagaaacagacacctgcccTCGAGGAGCTCACAGTCTAGacaaacaaacccagggt	1	hsa-mir-151b,	hsa-mir-151b	acctctgatgtgtcagtctctcttcagggctcccgagacacagaaacagacacctgcccTCGAGGAGCTCACAGTCTagacaaacaaacccagggt	hsa-miR-151b	TCGAGGAGCTCACAGTCT	3'	Diff	gp1a	..(((((...(((..((((..((...(((((((((((...(((..........)))..)))).)))))))..))...))))..)))....))))).	93	54.2	-30.8	32.5	29.5	18	29.5285	24.954	24.0283	middle
107	143	hsa-miR-151b_R+3	TCGAGGAGCTCACAGTCTAGT	21	chr8	-	140732564	140732676	ggggcaaagatgactaaaacacttttcctgcccTCGAGGAGCTCACAGTCTAGTatgtctcatcccctaCTAGACTGAAGCTCCTTGAGGacagggatggtcatactcacctc	24	hsa-mir-151a,mml-mir-151,ptr-mir-151,ppy-mir-151a,ggo-mir-151a,ppa-mir-151,nle-mir-151,oga-mir-151,mmr-mir-151,dma-mir-151,sbo-mir-151,mmu-mir-151,bta-mir-151,eca-mir-151,cfa-mir-151,efu-mir-151,rno-mir-151,ssc-mir-151,cpo-mir-151,pal-mir-151,dno-mir-151,ocu-mir-151,chi-mir-151,cgr-mir-151,	hsa-mir-151a	tttcctgcccTCGAGGAGCTCACAGTCTagtatgtctcatcccctaCTAGACTGAAGCTCCTTGAGGacagggatggtcatactcacctc	hsa-miR-151b	TCGAGGAGCTCACAGTCT	5'	Diff	gp1a	((((.....(((((((........((((((.((((((((((((..((((((((((............)))))))))).)))))))))))).))))))))))))).....))))	113	50.4	-54.3	1112.5	980.5	755	1010.78	829.404	1007.85	high
107	144	hsa-miR-151a-3p	CTAGACTGAAGCTCCTTGAGG	21	chr8	-	140732564	140732676	ggggcaaagatgactaaaacacttttcctgcccTCGAGGAGCTCACAGTCTAGTatgtctcatcccctaCTAGACTGAAGCTCCTTGAGGacagggatggtcatactcacctc	24	hsa-mir-151a,mml-mir-151,ptr-mir-151,ppy-mir-151a,ggo-mir-151a,ppa-mir-151,nle-mir-151,oga-mir-151,mmr-mir-151,dma-mir-151,sbo-mir-151,mmu-mir-151,bta-mir-151,eca-mir-151,cfa-mir-151,efu-mir-151,rno-mir-151,ssc-mir-151,cpo-mir-151,pal-mir-151,dno-mir-151,ocu-mir-151,chi-mir-151,cgr-mir-151,	hsa-mir-151a	tttcctgcccTCGAGGAGCTCACAGTCTagtatgtctcatcccctaCTAGACTGAAGCTCCTTGAGGacagggatggtcatactcacctc	hsa-miR-151a-3p	CTAGACTGAAGCTCCTTGAGG	3'	Yes	gp1a	((((.....(((((((........((((((.((((((((((((..((((((((((............)))))))))).)))))))))))).))))))))))))).....))))	113	50.4	-54.3	346	385	315	314.365	325.671	420.495	high
108	145	hsa-miR-152-3p	TCAGTGCATGACAGAACTTGG	21	chr17	-	48037154	48037263	aggaggctcggcccgctgtcccccccggcccaggttctgtgatacactccgactcgggctctggagcagTCAGTGCATGACAGAACTTGGgcccggaaggaccttctgca	23	hsa-mir-152,mml-mir-152,ptr-mir-152,ppy-mir-152,ggo-mir-152,ppa-mir-152,nle-mir-152,cja-mir-152,oga-mir-152,mmr-mir-152,mmu-mir-152,bta-mir-152,mdo-mir-152,cfa-mir-152,ocu-mir-152,efu-mir-152,rno-mir-152,ssc-mir-152,cpo-mir-152,pal-mir-152,cgr-mir-152,tch-mir-152,oar-mir-152,	hsa-mir-152	tgtcccccccggcccAGGTTCTGTGATACACTCCGACTcgggctctggagcagTCAGTGCATGACAGAACTTGGgcccggaaggacc	hsa-miR-152-3p	TCAGTGCATGACAGAACTTGG	3'	Yes	gp1a	((((((..(((....)))(((..((.((((((((((((((.((.((((..((((...(((....))))))))))).)).)))))))))))))).))..)))))))))...	107	64.5	-51.4	287	330	170	260.759	279.147	226.934	middle
109	146	hsa-miR-154-5p	TAGGTTATCCGTGTTGCCTTCG	22	chr14	+	101059755	101059838	gtggtacttgaagaTAGGTTATCCGTGTTGCCTTCGctttatttgtgacgAATCATACACGGTTGACCTATTtttcagtaccaa	14	hsa-mir-154,ptr-mir-154,ppy-mir-154,ggo-mir-154,ppa-mir-154,mml-mir-154,mne-mir-154,cja-mir-154,mmu-mir-154,eca-mir-154a,rno-mir-154,dno-mir-154a,ocu-mir-154,cgr-mir-154,	hsa-mir-154	gtggtacttgaagaTAGGTTATCCGTGTTGCCTTCGctttatttgtgacgAATCATACACGGTTGACCTATTtttcagtaccaa	hsa-miR-154-5p	TAGGTTATCCGTGTTGCCTTCG	5'	Yes	gp1a	.(((((((..(((((((((((.((((((((...((((.......)))).....)).)))))).)))))))))))..))))))).	82	40.5	-36.4	0	5	0	0	4.2295	0	low
109	147	hsa-miR-154-3p	AATCATACACGGTTGACCTATT	22	chr14	+	101059755	101059838	gtggtacttgaagaTAGGTTATCCGTGTTGCCTTCGctttatttgtgacgAATCATACACGGTTGACCTATTtttcagtaccaa	14	hsa-mir-154,ptr-mir-154,ppy-mir-154,ggo-mir-154,ppa-mir-154,mml-mir-154,mne-mir-154,cja-mir-154,mmu-mir-154,eca-mir-154a,rno-mir-154,dno-mir-154a,ocu-mir-154,cgr-mir-154,	hsa-mir-154	gtggtacttgaagaTAGGTTATCCGTGTTGCCTTCGctttatttgtgacgAATCATACACGGTTGACCTATTtttcagtaccaa	hsa-miR-154-3p	AATCATACACGGTTGACCTATT	3'	Yes	gp1a	.(((((((..(((((((((((.((((((((...((((.......)))).....)).)))))).)))))))))))..))))))).	82	40.5	-36.4	0	13	0	0	10.9967	0	middle
110	148	hsa-miR-155-5p_R-1	TTAATGCTAATCGTGATAGGGGT	23	chr21	+	25573963	25574073	ttgctgtaggctgtatgctgTTAATGCTAATCGTGATAGGGGTttttgcctccaactgactcctacatattagcattaacagtgtatgatgcctgttactagcattcacat	20	hsa-mir-155,ptr-mir-155,ppy-mir-155,mml-mir-155,ggo-mir-155,ppa-mir-155,cja-mir-155,nle-mir-155,ocu-mir-155,oga-mir-155,cpo-mir-155,bta-mir-155,eca-mir-155,cfa-mir-155,efu-mir-155,pal-mir-155,dno-mir-155,chi-mir-155,cgr-mir-155,tch-mir-155,	hsa-mir-155	ctgTTAATGCTAATCGTGATAGGGGTTtttgcctccaactgaCTCCTACATATTAGCATTAACAg	hsa-miR-155-5p	TTAATGCTAATCGTGATAGGGGTT	5'	Diff	gp1a	.((((((((((.(((..((((((((((((((.(((.((((((((.(((....)))..)))))))))))))))))))))))))..)))...)))))....))))).......	103	40.5	-46.6	21	22	12	19.0799	18.6098	16.0188	middle
111	149	hsa-miR-181a-5p	AACATTCAACGCTGTCGGTGAGT	23	chr9	+	124692442	124692551	agaagggctatcaggccagccttcagaggactccaaggAACATTCAACGCTGTCGGTGAGTttgggatttgaaaaaACCACTGACCGTTGACTGTACcttggggtcctta	26	hsa-mir-181a-2,ptr-mir-181a-2,ppy-mir-181a-2,ppa-mir-181a-2,ggo-mir-181a-2,mml-mir-181a-2,cja-mir-181a-2,nle-mir-181a-2,oga-mir-181a-2,mmr-mir-181a,cfa-mir-181a-2,pal-mir-181a-2,ocu-mir-181a-2,tch-mir-181a-2,mne-mir-181a-2,dma-mir-181a-2,sbo-mir-181a-2,sla-mir-181a-2,bta-mir-181a-2,eca-mir-181a,mdo-mir-181a-2,efu-mir-181f,ssc-mir-181a-2,cpo-mir-181a-2,dno-mir-181a-2,oar-mir-181a-2,	hsa-mir-181a-2	agaagggctatcaggccagccttcagaggactccaaggAACATTCAACGCTGTCGGTGAGTttgggatttgaaaaaACCACTGACCGTTGACTGTACCttggggtcctta	hsa-miR-181a-5p	AACATTCAACGCTGTCGGTGAGT	5'	Yes	gp1a	.((((((((....)))...))))).(((((((((((((.(((.((((((..(((((((.((((...........))))))))))))))))).))).))))))))))))).	84	50	-53.8	345	376.5	288	313.456	318.481	384.452	high
111	150	hsa-miR-181a-2-3p_R-1	ACCACTGACCGTTGACTGTAC	21	chr9	+	124692442	124692551	agaagggctatcaggccagccttcagaggactccaaggAACATTCAACGCTGTCGGTGAGTttgggatttgaaaaaACCACTGACCGTTGACTGTACcttggggtcctta	26	hsa-mir-181a-2,ptr-mir-181a-2,ppy-mir-181a-2,ppa-mir-181a-2,ggo-mir-181a-2,mml-mir-181a-2,cja-mir-181a-2,nle-mir-181a-2,oga-mir-181a-2,mmr-mir-181a,cfa-mir-181a-2,pal-mir-181a-2,ocu-mir-181a-2,tch-mir-181a-2,mne-mir-181a-2,dma-mir-181a-2,sbo-mir-181a-2,sla-mir-181a-2,bta-mir-181a-2,eca-mir-181a,mdo-mir-181a-2,efu-mir-181f,ssc-mir-181a-2,cpo-mir-181a-2,dno-mir-181a-2,oar-mir-181a-2,	hsa-mir-181a-2	agaagggctatcaggccagccttcagaggactccaaggAACATTCAACGCTGTCGGTGAGTttgggatttgaaaaaACCACTGACCGTTGACTGTACCttggggtcctta	hsa-miR-181a-2-3p	ACCACTGACCGTTGACTGTACC	3'	Diff	gp1a	.((((((((....)))...))))).(((((((((((((.(((.((((((..(((((((.((((...........))))))))))))))))).))).))))))))))))).	84	50	-53.8	9	0	16	8.17712	0	21.3585	middle
112	151	hsa-miR-181b-5p_R-2	AACATTCATTGCTGTCGGTGG	21	chr1	-	198858873	198858982	cctgtgcagagattattttttaaaaggtcacaatcAACATTCATTGCTGTCGGTGGgttgaactgtgtggacaagctcactgaacaatgaatgcaactgtggccccgctt	25	hsa-mir-181b-1,ggo-mir-181b,ppa-mir-181b,lla-mir-181b,ptr-mir-181b-1,ppy-mir-181b,mml-mir-181b-1,mne-mir-181b,cja-mir-181b-1,nle-mir-181b-1,tch-mir-181b,oga-mir-181b-1,dma-mir-181b-1,cfa-mir-181b-1,mmu-mir-181b-1,bta-mir-181b-1,mdo-mir-181b-1,efu-mir-181b,rno-mir-181b-1,ssc-mir-181b-1,cpo-mir-181b-1,pal-mir-181b-1,dno-mir-181b-1,ocu-mir-181b-1,cgr-mir-181b,	hsa-mir-181b-1	cctgtgcagagattattttttaaaaggtcacaatcAACATTCATTGCTGTCGGTGGGTtgaactgtgtggacaagCTCACTGAACAATGAATGCAActgtggccccgctt	hsa-miR-181b-5p	AACATTCATTGCTGTCGGTGGGT	5'	Diff	gp1a	.....((.((((.....))))....(((((((.....(((((((((...((((((((((...((....))...)))))))))).)))))))))....)))))))..))..	79	44.5	-33.5	55.6667	88.5	47.1667	50.577	74.8621	62.963	middle
113	152	hsa-miR-181c-5p_R+2	AACATTCAACCTGTCGGTGAGTTT	24	chr19	+	13874699	13874808	cggaaaatttgccaagggtttgggggAACATTCAACCTGTCGGTGAGTTTgggcagctcaggcaaACCATCGACCGTTGAGTGGACcctgaggcctggaattgccatcct	24	hsa-mir-181c,ptr-mir-181c,ggo-mir-181c,ppa-mir-181c,ppy-mir-181c,mml-mir-181c,cja-mir-181c,nle-mir-181c,oga-mir-181c,dma-mir-181c,cfa-mir-181c,dno-mir-181c,mmu-mir-181c,bta-mir-181c,mdo-mir-181a-3,efu-mir-181c,rno-mir-181c,ssc-mir-181c,cpo-mir-181c,pal-mir-181c,ocu-mir-181c,chi-mir-181c,cgr-mir-181c,tch-mir-181c,	hsa-mir-181c	cggaaaatttgccaagggtttgggggAACATTCAACCTGTCGGTGAGTttgggcagctcaggcaAACCATCGACCGTTGAGTGGACcctgaggcctggaattgccatcct	hsa-miR-181c-5p	AACATTCAACCTGTCGGTGAGT	5'	Diff	gp1a	.(((.......((.(((..(..(((...((((((((..(((((((.(((((((....))...)))))))))))).))))))))..)))..)..)))))........))).	87	54.5	-41.9	13	28	13	11.8114	23.6852	17.3537	middle
113	153	hsa-miR-181c-3p_L-1	ACCATCGACCGTTGAGTGGAC	21	chr19	+	13874699	13874808	cggaaaatttgccaagggtttgggggAACATTCAACCTGTCGGTGAGTTTgggcagctcaggcaaACCATCGACCGTTGAGTGGACcctgaggcctggaattgccatcct	24	hsa-mir-181c,ptr-mir-181c,ggo-mir-181c,ppa-mir-181c,ppy-mir-181c,mml-mir-181c,cja-mir-181c,nle-mir-181c,oga-mir-181c,dma-mir-181c,cfa-mir-181c,dno-mir-181c,mmu-mir-181c,bta-mir-181c,mdo-mir-181a-3,efu-mir-181c,rno-mir-181c,ssc-mir-181c,cpo-mir-181c,pal-mir-181c,ocu-mir-181c,chi-mir-181c,cgr-mir-181c,tch-mir-181c,	hsa-mir-181c	cggaaaatttgccaagggtttgggggAACATTCAACCTGTCGGTGAGTttgggcagctcaggcaAACCATCGACCGTTGAGTGGACcctgaggcctggaattgccatcct	hsa-miR-181c-3p	AACCATCGACCGTTGAGTGGAC	3'	Diff	gp1a	.(((.......((.(((..(..(((...((((((((..(((((((.(((((((....))...)))))))))))).))))))))..)))..)..)))))........))).	87	54.5	-41.9	9	0	7	8.17712	0	9.34433	low
114	154	hsa-miR-181b-5p_R-2	AACATTCATTGCTGTCGGTGG	21	chr9	+	124693710	124693798	ctgatggctgcactcAACATTCATTGCTGTCGGTGGgtttgagtctgaatcaactcactgatcaatgaatgcaaactgcggaccaaaca	21	hsa-mir-181b-2,eca-mir-181b,ptr-mir-181b-2,ppy-mir-181b-2,mml-mir-181b-2,cja-mir-181b-2,nle-mir-181b-2,oga-mir-181e,dma-mir-181b-2,cfa-mir-181b-2,mmu-mir-181b-2,bta-mir-181b-2,mdo-mir-181b-2,efu-mir-181e,rno-mir-181b-2,ssc-mir-181b-2,cpo-mir-181b-2,pal-mir-181b-2,dno-mir-181b-2,ocu-mir-181b-2,chi-mir-181b,	hsa-mir-181b-2	ctgatggctgcactcAACATTCATTGCTGTCGGTGGGTttgagtctgaatcaaCTCACTGATCAATGAATGCAaactgcggaccaaaca	hsa-miR-181b-5p	AACATTCATTGCTGTCGGTGGGT	5'	Diff	gp1a	....((((((((.....(((((((((..(((((((((((.((.......)))))))))))))))))))))).....))))).)))....	81	46.1	-34.7	55.6667	88.5	47.1667	50.577	74.8621	62.963	middle
115	155	hsa-miR-181d-5p_R+1	AACATTCATTGTTGTCGGTGGGTT	24	chr19	+	13874875	13875011	gtcccctcccctaggccacagccgaggtcacaatcAACATTCATTGTTGTCGGTGGGTTgtgaggactgaggccagacccaccgggggatgaatgtcactgtggctgggccagacacggcttaaggggaatggggac	19	hsa-mir-181d,ptr-mir-181d,ppy-mir-181d,ggo-mir-181d,ppa-mir-181d,mml-mir-181d,cja-mir-181d,oga-mir-181d,mmu-mir-181d,bta-mir-181d,cfa-mir-181d,efu-mir-181d,rno-mir-181d,ssc-mir-181d,pal-mir-181d,dno-mir-181d,chi-mir-181d,cgr-mir-181d,tch-mir-181d,	hsa-mir-181d	gtcccctcccctaggccacagccgaggtcacaatcAACATTCATTGTTGTCGGTGGGTtgtgaggactgaggccagacCCACCGGGGGATGAATGTCACtgtggctgggccagacacggcttaaggggaatggggac	hsa-miR-181d-5p	AACATTCATTGTTGTCGGTGGGT	5'	Diff	gp1a	(((((((((((((((((...(((..(((((((....(((((((((....((((((((((....((.......)).))))))))))..)))))))))...))))))).))).......)))))).)))))..))))))	137	59.9	-66.6	45.6667	25	30.1667	41.4913	21.1475	40.2696	middle
116	156	hsa-miR-181a-5p	AACATTCAACGCTGTCGGTGAGT	23	chr1	-	198859044	198859153	tgagttttgaggttgcttcagtgAACATTCAACGCTGTCGGTGAGTttggaattaaaatcaaaaccatcgaccgttgattgtaccctatggctaaccatcatctactcca	29	hsa-mir-181a-1,ptr-mir-181a-1,ppy-mir-181a-1,ppa-mir-181a-1,mml-mir-181a-1,mne-mir-181a-1,lla-mir-181a-1,ggo-mir-181a-1,cja-mir-181a-1,nle-mir-181a-1,oga-mir-181a-1,dma-mir-181a-1,sbo-mir-181a-1,cfa-mir-181a-1,cpo-mir-181a-1,dno-mir-181a-1,ocu-mir-181a-1,mmu-mir-181a-1,bta-mir-181a-1,eca-mir-181a-2,mdo-mir-181a-1,efu-mir-181a,rno-mir-181a-1,ssc-mir-181a-1,pal-mir-181a-1,cgr-mir-181a,tch-mir-181a-…	hsa-mir-181a-1	tgagttttgaggttgcttcagtgAACATTCAACGCTGTCGGTGAGTttggaattaaaatcaaaACCATCGACCGTTGATTGTACCctatggctaaccatcatctactcca	hsa-miR-181a-5p	AACATTCAACGCTGTCGGTGAGT	5'	Yes	gp1a	.((((..((((((((((..((...(((.((((((..(((((((.((((.((.......)).))))))))))))))))).)))...))..))).)))).)))...))))..	107	41.8	-37.2	345	376.5	288	313.456	318.481	384.452	high
117	157	hsa-miR-182-5p_R-1	TTTGGCAATGGTAGAACTCACAC	23	chr7	-	129770379	129770492	gagctgcttgcctccccccgttTTTGGCAATGGTAGAACTCACACtggtgaggtaacaggatccggtggttctagacttgccaactatggggcgaggactcagccggcaccctg	19	hsa-mir-182,ptr-mir-182,ppy-mir-182,ggo-mir-182,mml-mir-182,cja-mir-182,nle-mir-182,oga-mir-182,cpo-mir-182,dno-mir-182,mmr-mir-182,mmu-mir-182,eca-mir-182,mdo-mir-182,cfa-mir-182,efu-mir-182,ssc-mir-182,ocu-mir-182,chi-mir-182,	hsa-mir-182	gagctgcttgcctccccccgttTTTGGCAATGGTAGAACTCACACTggtgaggtaacaggatccggTGGTTCTAGACTTGCCAACTAtggggcgaggactcagccggcac	hsa-miR-182-5p	TTTGGCAATGGTAGAACTCACACT	5'	Diff	gp1a	..((((((..((((.((((((..(((((((...((((((...((((((..............))))))))))))...)))))))..)))))).))))....))).)))......	106	57.9	-46.8	62	30	17	56.3313	25.377	22.6934	middle
118	158	hsa-miR-183-5p_R+1	TATGGCACTGGTAGAATTCACTG	23	chr7	-	129774905	129775014	ccgcagagtgtgactcctgttctgtgTATGGCACTGGTAGAATTCACTGtgaacagtctcagtcagTGAATTACCGAAGGGCCATAAAcagagcagagacagatccacga	23	hsa-mir-183,ptr-mir-183,ggo-mir-183,ppa-mir-183,ppy-mir-183,mml-mir-183,mne-mir-183,cja-mir-183,sla-mir-183,mmu-mir-183,bta-mir-183,ssc-mir-183,eca-mir-183,mdo-mir-183,cfa-mir-183,pal-mir-183,dno-mir-183,ocu-mir-183,tch-mir-183,rno-mir-183,cpo-mir-183,chi-mir-183,cgr-mir-183,	hsa-mir-183	ccgcagagtgtgactcctgttctgtgTATGGCACTGGTAGAATTCACTgtgaacagtctcagtcaGTGAATTACCGAAGGGCCATAAacagagcagagacagatccacga	hsa-miR-183-5p	TATGGCACTGGTAGAATTCACT	5'	Diff	gp1a	.......(((.((.(((((((((((.((((((..(((((..(((((((((((......)))..)))))))))))))....)))))).))))))))).))....)))))..	101	49.1	-41.7	14	19	6	12.72	16.0721	8.00942	middle
118	159	hsa-miR-183-3p_L-1R+1	TGAATTACCGAAGGGCCATAAT	22	chr7	-	129774905	129775014	ccgcagagtgtgactcctgttctgtgTATGGCACTGGTAGAATTCACTGtgaacagtctcagtcagTGAATTACCGAAGGGCCATAAAcagagcagagacagatccacga	23	hsa-mir-183,ptr-mir-183,ggo-mir-183,ppa-mir-183,ppy-mir-183,mml-mir-183,mne-mir-183,cja-mir-183,sla-mir-183,mmu-mir-183,bta-mir-183,ssc-mir-183,eca-mir-183,mdo-mir-183,cfa-mir-183,pal-mir-183,dno-mir-183,ocu-mir-183,tch-mir-183,rno-mir-183,cpo-mir-183,chi-mir-183,cgr-mir-183,	hsa-mir-183	ccgcagagtgtgactcctgttctgtgTATGGCACTGGTAGAATTCACTgtgaacagtctcagtcaGTGAATTACCGAAGGGCCATAAacagagcagagacagatccacga	hsa-miR-183-3p	GTGAATTACCGAAGGGCCATAA	3'	Diff	gp1a	.......(((.((.(((((((((((.((((((..(((((..(((((((((((......)))..)))))))))))))....)))))).))))))))).))....)))))..	101	49.1	-41.7	8	0	0	7.26855	0	0	low
119	160	hsa-miR-184_1ss22TC	TGGACGGAGAACTGATAAGGGC	22	chr15	+	79209788	79209871	ccagtcacgtccccttatcacttttccagcccagctttgtgactgtaagtgtTGGACGGAGAACTGATAAGGGTaggtgattga	20	hsa-mir-184,ptr-mir-184,ppy-mir-184,mml-mir-184,mne-mir-184,cja-mir-184,oga-mir-184,mmu-mir-184,bta-mir-184,chi-mir-184,eca-mir-184,mdo-mir-184,cfa-mir-184,rno-mir-184,ssc-mir-184,cpo-mir-184,pal-mir-184,dno-mir-184,ocu-mir-184,tch-mir-184,	hsa-mir-184	ccagtcacgtccccttatcacttttccagcccagctttgtgactgtaagtgtTGGACGGAGAACTGATAAGGGTaggtgattga	hsa-miR-184	TGGACGGAGAACTGATAAGGGT	3'	Diff	gp1a	.(((((((...(((((((((.((((((...(((((((((......)))).)))))..)))))).)))))))))...))))))).	82	48.8	-35.6	0	0	8	0	0	10.6792	middle
120	161	hsa-miR-185-5p	TGGAGAGAAAGGCAGTTCCTGA	22	chr22	+	20033116	20033243	tgggcagtgggcctggctcgagcagggggcgagggatTGGAGAGAAAGGCAGTTCCTGAtggtcccctccccAGGGGCTGGCTTTCCTCTGGTccttccctcccaatgaccgcgtcttcgtcgaggcc	19	hsa-mir-185,ppy-mir-185,ptr-mir-185,ggo-mir-185,mml-mir-185,cja-mir-185,oga-mir-185,mmu-mir-185,eca-mir-185,cfa-mir-185,tch-mir-185,efu-mir-185,rno-mir-185,ssc-mir-185,cpo-mir-185,pal-mir-185,dno-mir-185,ocu-mir-185,cgr-mir-185,	hsa-mir-185	agggggcgagggatTGGAGAGAAAGGCAGTTCCTGAtggtcccctccccAGGGGCTGGCTTTCCTCTGGTCcttccctccca	hsa-miR-185-5p	TGGAGAGAAAGGCAGTTCCTGA	5'	Yes	gp1a	.((((.....))))(((((((...(((((.(((((((..(((.(((((.(((..((((..((......)).))))..))).))))))))..))))))).)))))...(((...)))....))))).))	80	65.6	-65.2	818	823	835	743.209	696.175	1114.64	high
120	162	hsa-miR-185-3p_R-1	AGGGGCTGGCTTTCCTCTGGT	21	chr22	+	20033116	20033243	tgggcagtgggcctggctcgagcagggggcgagggatTGGAGAGAAAGGCAGTTCCTGAtggtcccctccccAGGGGCTGGCTTTCCTCTGGTccttccctcccaatgaccgcgtcttcgtcgaggcc	19	hsa-mir-185,ppy-mir-185,ptr-mir-185,ggo-mir-185,mml-mir-185,cja-mir-185,oga-mir-185,mmu-mir-185,eca-mir-185,cfa-mir-185,tch-mir-185,efu-mir-185,rno-mir-185,ssc-mir-185,cpo-mir-185,pal-mir-185,dno-mir-185,ocu-mir-185,cgr-mir-185,	hsa-mir-185	agggggcgagggatTGGAGAGAAAGGCAGTTCCTGAtggtcccctccccAGGGGCTGGCTTTCCTCTGGTCcttccctccca	hsa-miR-185-3p	AGGGGCTGGCTTTCCTCTGGTC	3'	Diff	gp1a	.((((.....))))(((((((...(((((.(((((((..(((.(((((.(((..((((..((......)).))))..))).))))))))..))))))).)))))...(((...)))....))))).))	80	65.6	-65.2	0	7	0	0	5.92129	0	low
121	163	hsa-miR-186-5p	CAAAGAATTCTCCTTTTGGGCT	22	chr1	-	71067631	71067716	tgcttgtaactttcCAAAGAATTCTCCTTTTGGGCTttctggttttattttaagcccaaaggtgaattttttgggaagtttgagct	25	hsa-mir-186,ptr-mir-186,ppy-mir-186,ggo-mir-186,ppa-mir-186,mml-mir-186,cja-mir-186,nle-mir-186,sbo-mir-186,oga-mir-186,dma-mir-186,mmu-mir-186,bta-mir-186,chi-mir-186,eca-mir-186,mdo-mir-186,cfa-mir-186,dno-mir-186,rno-mir-186,ssc-mir-186,cpo-mir-186,pal-mir-186,ocu-mir-186,cgr-mir-186,tch-mir-186,	hsa-mir-186	tgcttgtaactttcCAAAGAATTCTCCTTTTGGGCTttctggttttattttaaGCCCAAAGGTGAATTTTTTGGGaagtttgagct	hsa-miR-186-5p	CAAAGAATTCTCCTTTTGGGCT	5'	Yes	gp1a	.(((...(((((((((((((((((.(((((.((((((..............))))))))))).)))))))))))))))))..))).	84	36	-39.7	298	259	223	270.753	219.088	297.684	middle
122	164	hsa-miR-187-3p_R+1	TCGTGTCTTGTGTTGCAGCCGGA	23	chr18	-	35904818	35904926	ggtcgggctcaccatgacacagtgtgagacctcgggctacaacacaggacccgggcgctgctctgaccccTCGTGTCTTGTGTTGCAGCCGGAgggacgcaggtccgca	14	hsa-mir-187,ggo-mir-187,ppa-mir-187,ppy-mir-187,mml-mir-187,mne-mir-187,cja-mir-187,mmr-mir-187,bta-mir-187,cfa-mir-187,rno-mir-187,ssc-mir-187,chi-mir-187,cgr-mir-187,	hsa-mir-187	ggtcgggctcaccatgacacagtgtgagacctcgGGCTACAACACAGGACCCGGGCgctgctctgaccccTCGTGTCTTGTGTTGCAGCCGGagggacgcaggtccgca	hsa-miR-187-3p	TCGTGTCTTGTGTTGCAGCCGG	3'	Diff	gp1a	.(.((((((.............((((...((((.((((.(((((((((((.((((..............)))).))))))))))).)))).))))..))))))))))).	79	65.1	-46.8	0	5	0	0	4.2295	0	low
123	165	hsa-miR-190b-5p_R+1	TGATATGTTTGATATTGGGTTGT	23	chr1	-	154193642	154193753	ctctcctgcctgcttctgtgTGATATGTTTGATATTGGGTTGTttaattaggaaccaactaaatgtcaaacatattcttacagcagcaggtgattcagcaccaccctctttc	19	hsa-mir-190b,ppy-mir-190b,ptr-mir-190b,ggo-mir-190b,mml-mir-190b,cja-mir-190b,mmu-mir-190b,bta-mir-190b,eca-mir-190b,mdo-mir-190b,cfa-mir-190b,ssc-mir-190b,chi-mir-190b,cpo-mir-190b,ocu-mir-190b,tch-mir-190b,pal-mir-190b,dno-mir-190b,cgr-mir-190b,	hsa-mir-190b	tgcttctgtgTGATATGTTTGATATTGGGTTGtttaattaggaaccaACTAAATGTCAAACATATTCTtacagcagcag	hsa-miR-190b-5p	TGATATGTTTGATATTGGGTTG	5'	Diff	gp1a	.......(((((((.(((((.(((((((((((((((..(((((((......))).))))..)))))))))))))))..))))).))))))).....................	84	41.1	-40	5	0	0	4.54284	0	0	low
124	166	hsa-miR-191-5p	CAACGGAATCCCAAAAGCAGCTG	23	chr3	-	49020602	49020714	gccaacggctggacagcgggCAACGGAATCCCAAAAGCAGCTGttgtctccagagcattccaGCTGCGCTTGGATTTCGTCCcctgctctcctgcctgagcagcgccctggcc	28	hsa-mir-191,ppy-mir-191,mml-mir-191,ptr-mir-191,ggo-mir-191,ppa-mir-191,sbo-mir-191,cja-mir-191,nle-mir-191,oga-mir-191,mmr-mir-191,dma-mir-191,cfa-mir-191,dno-mir-191,tch-mir-191,mmu-mir-191,bta-mir-191,oar-mir-191,eca-mir-191a,mdo-mir-191,efu-mir-191,rno-mir-191a,ssc-mir-191,cpo-mir-191,pal-mir-191,ocu-mir-191,chi-mir-191,cgr-mir-191,	hsa-mir-191	cggctggacagcgggCAACGGAATCCCAAAAGCAGCTGttgtctccagagcattccaGCTGCGCTTGGATTTCGTCCCCtgctctcctgcct	hsa-miR-191-5p	CAACGGAATCCCAAAAGCAGCTG	5'	Yes	gp1a	((((..(((.(((.((((((..(((((((((.((..(((((((..((((....)).))..)))))))..)))))))))))..)))))).))).)))...((...))..)))).	90	62.8	-53.1	2075	1786	1513	1885.28	1510.78	2019.71	high
124	167	hsa-miR-191-3p_R-2_2ss6GA19CT	GCTGCACTTGGATTTCGTTC	20	chr3	-	49020602	49020714	gccaacggctggacagcgggCAACGGAATCCCAAAAGCAGCTGttgtctccagagcattccaGCTGCGCTTGGATTTCGTCCcctgctctcctgcctgagcagcgccctggcc	28	hsa-mir-191,ppy-mir-191,mml-mir-191,ptr-mir-191,ggo-mir-191,ppa-mir-191,sbo-mir-191,cja-mir-191,nle-mir-191,oga-mir-191,mmr-mir-191,dma-mir-191,cfa-mir-191,dno-mir-191,tch-mir-191,mmu-mir-191,bta-mir-191,oar-mir-191,eca-mir-191a,mdo-mir-191,efu-mir-191,rno-mir-191a,ssc-mir-191,cpo-mir-191,pal-mir-191,ocu-mir-191,chi-mir-191,cgr-mir-191,	hsa-mir-191	cggctggacagcgggCAACGGAATCCCAAAAGCAGCTGttgtctccagagcattccaGCTGCGCTTGGATTTCGTCCCCtgctctcctgcct	hsa-miR-191-3p	GCTGCGCTTGGATTTCGTCCCC	3'	Diff	gp1a	((((..(((.(((.((((((..(((((((((.((..(((((((..((((....)).))..)))))))..)))))))))))..)))))).))).)))...((...))..)))).	90	62.8	-53.1	0	5	0	0	4.2295	0	low
125	168	hsa-miR-192-5p	CTGACCTATGAATTGACAGCC	21	chr11	-	64891132	64891246	gccgagaccgagtgcacagggctCTGACCTATGAATTGACAGCCagtgctctcgtctcccctctggctgccaattccataggtcacaggtatgttcgcctcaatgccagccacca	20	hsa-mir-192,ppy-mir-192,ptr-mir-192,ggo-mir-192,ppa-mir-192,mml-mir-192,nle-mir-192,oga-mir-192,mmu-mir-192,bta-mir-192,eca-mir-192,cfa-mir-192,efu-mir-192,rno-mir-192,ssc-mir-192,cpo-mir-192,dno-mir-192,chi-mir-192,cgr-mir-192,tch-mir-192,	hsa-mir-192	gccgagaccgagtgcacagggctCTGACCTATGAATTGACAGCCagtgctctcgtctcccctctggCTGCCAATTCCATAGGTCACAGgtatgttcgcctcaatgccagc	hsa-miR-192-5p	CTGACCTATGAATTGACAGCC	5'	Yes	gp1a	((((....)).))......(((..((((((((((((((.(((((((................))))))).))))).)))))))))..(((((..........))))).)))....	61	57.4	-39.6	295.5	474	162	268.482	400.956	216.254	high
126	169	hsa-miR-193a-5p	TGGGTCTTTGCGGGCGAGATGA	22	chr17	+	31559980	31560090	gacgcaccccgaactccgaggatgggagctgagggcTGGGTCTTTGCGGGCGAGATGAgggtgtcggatcaactggcctacaaagtcccagttctcggcccccgggaccag	15	hsa-mir-193a,ptr-mir-193a,ppy-mir-193a,ggo-mir-193a,ppa-mir-193a,mml-mir-193a,oga-mir-193a,eca-mir-193a,cfa-mir-193a,cpo-mir-193a,dno-mir-193a,ocu-mir-193a,efu-mir-193a,ssc-mir-193a,pal-mir-193a,	hsa-mir-193a	cgaggatgggagctgagggcTGGGTCTTTGCGGGCGAGATGAgggtgtcggatcAACTGGCCTACAAAGTCCCAGTtctcggcccccg	hsa-miR-193a-5p	TGGGTCTTTGCGGGCGAGATGA	5'	Yes	gp1a	.......((((...((....)).(((.((((((..(((((.(((((..(((.((.(((..........))).)).)))..))))).)))))..))))))))))))).....	79	64.9	-55.9	25	68	29	22.7142	57.5211	38.7122	middle
127	170	hsa-miR-193b-5p	CGGGGTTTTGAGGGCGAGATGA	22	chr16	+	14303960	14304071	ggaggctgtggtctcagaatCGGGGTTTTGAGGGCGAGATGAgtttatgttttatccaactggccctcaaagtcccgcttttggggtcattctggacagcgagggactcagg	25	hsa-mir-193b,ppy-mir-193b,mml-mir-193b,ptr-mir-193b,ggo-mir-193b,cja-mir-193,nle-mir-193b,oga-mir-193b,mmr-mir-193,dma-mir-193,mdo-mir-193b,cpo-mir-193b,pal-mir-193b,ocu-mir-193b,tch-mir-193b,mmu-mir-193b,bta-mir-193b,eca-mir-193b,cfa-mir-193b,efu-mir-193b,rno-mir-193b,dno-mir-193b,chi-mir-193b,chi-mir-193a,cgr-mir-193b,	hsa-mir-193b	gtggtctcagaatCGGGGTTTTGAGGGCGAGATGAgtttatgttttatccAACTGGCCCTCAAAGTCCCGCTtttggggtcat	hsa-miR-193b-5p	CGGGGTTTTGAGGGCGAGATGA	5'	Yes	gp1a	.(((((((((..(((((((.((((..(((((((((.((.((..(.........)..)).)).)))))))))..)))).)))))))..).......)))))......)))...	108	53.6	-46.6	5	20	16	4.54284	16.918	21.3585	middle
128	171	hsa-miR-194-5p	TGTAACAGCAACTCCATGTGGA	22	chr1	-	220118157	220118241	atggtgttatcaagTGTAACAGCAACTCCATGTGGActgtgtaccaatttccagtggagatgctgttacttttgatggttaccaa	13	hsa-mir-194-1,ptr-mir-194,ggo-mir-194,mml-mir-194-1,mne-mir-194,age-mir-194,ppy-mir-194,cja-mir-194,mmu-mir-194-1,eca-mir-194-2,cfa-mir-194,efu-mir-194-1,ocu-mir-194,	hsa-mir-194-1	atggtgttatcaagTGTAACAGCAACTCCATGTGGActgtgtaccaatttccagtggagatgctgttacttttgatggttaccaa	hsa-miR-194-5p	TGTAACAGCAACTCCATGTGGA	5'	Yes	gp1a	.(((((..(((((..(((((((((.((((((.((((..((......)).)))))))))).)))))))))..)))))..).)))).	83	41.2	-36.9	64.5	106	34	58.6027	89.6653	45.3867	middle
129	172	hsa-miR-194-5p_R+1	TGTAACAGCAACTCCATGTGGAA	23	chr11	-	64891355	64891439	tggttcccgcccccTGTAACAGCAACTCCATGTGGAAgtgcccactggttccagtggggctgctgttatctggggcgagggccag	13	hsa-mir-194-2,mml-mir-194-2,mmu-mir-194-2,bta-mir-194-2,eca-mir-194-1,efu-mir-194-2,rno-mir-194-2,ssc-mir-194a,cpo-mir-194,pal-mir-194b,dno-mir-194,tch-mir-194,oar-mir-194,	hsa-mir-194-2	tggttcccgcccccTGTAACAGCAACTCCATGTGGAagtgcccactggttCCAGTGGGGCTGCTGTTATCTGgggcgagggccag	hsa-miR-194-5p	TGTAACAGCAACTCCATGTGGA	5'	Diff	gp1a	(((..(.((((((..(((((((((..(((....)))....(((((((....)))))))..)))))))))..)))))).)..))).	84	62.4	-51.4	224.5	297	134	203.974	251.232	178.877	middle
130	173	hsa-miR-195-5p_1ss21CA	TAGCAGCACAGAAATATTGGA	21	chr17	-	7017614	7017707	acacccagcttccctggctcTAGCAGCACAGAAATATTGGCacagggaagcgagtctgccaatattggctgtgctgctccaggcagggtggtga	17	hsa-mir-195,ppy-mir-195,ggo-mir-195,ppa-mir-195,ptr-mir-195,mml-mir-195,nle-mir-195,mmr-mir-195,mmu-mir-195a,bta-mir-195,eca-mir-195,cfa-mir-195,rno-mir-195,ssc-mir-195,dno-mir-195,ocu-mir-195,cgr-mir-195,	hsa-mir-195	agcttccctggctcTAGCAGCACAGAAATATTGGCacagggaagcgagtctgCCAATATTGGCTGTGCTGCTCCaggcagggtggtg	hsa-miR-195-5p	TAGCAGCACAGAAATATTGGC	5'	Diff	gp1a	.((((......(((((.((..((((((((((.((((((((((...((.......))))))))))))..))))))))))..)).))))).)))).	92	56.4	-47.5	7	0	0	6.35998	0	0	low
131	174	hsa-miR-196b-5p	TAGGTAGTTTCCTGTTGTTGGG	22	chr7	-	27169480	27169564	aactggtcggtgattTAGGTAGTTTCCTGTTGTTGGGatccacctttctctcgacagcacgacactgccttcattacttcagttg	24	hsa-mir-196b,ppy-mir-196b,ptr-mir-196b,ggo-mir-196b,nle-mir-196b,oga-mir-196b,mmr-mir-196b,cfa-mir-196b,cpo-mir-196b,dno-mir-196b,ocu-mir-196b,mml-mir-196b,cja-mir-196b,mmu-mir-196b,bta-mir-196b,rno-mir-196b-1,rno-mir-196b-2,chi-mir-196b,eca-mir-196b,mdo-mir-196b,ssc-mir-196b-1,ssc-mir-196b-2,pal-mir-196b,cgr-mir-196b,	hsa-mir-196b	actggtcggtgattTAGGTAGTTTCCTGTTGTTGGGatccacctttctcTCGACAGCACGACACTGCCTTCattacttcagttg	hsa-miR-196b-5p	TAGGTAGTTTCCTGTTGTTGGG	5'	Yes	gp1a	((((((..((((((..(((((((.((.(((((((((((..........))))))))))).)).)))))))..)))))))))))).	84	47.1	-35.8	33	49	23	29.9828	41.4491	30.7028	middle
132	175	hsa-miR-196a-5p	TAGGTAGTTTCATGTTGTTGGG	22	chr17	-	48632475	48632576	tgaattggaactgctgagtgaatTAGGTAGTTTCATGTTGTTGGGcctgggtttctgaacacaacaacattaaaccacccgattcacggcagttactgctcc	15	hsa-mir-196a-1,ppy-mir-196-1,ggo-mir-196-1,mml-mir-196a-1,ptr-mir-196a-1,cja-mir-196a,oga-mir-196a,mmu-mir-196a-1,bta-mir-196a-1,chi-mir-196a,eca-mir-196a,cfa-mir-196a-1,ssc-mir-196a-1,cpo-mir-196a,ocu-mir-196a-1,	hsa-mir-196a-1	gtgaatTAGGTAGTTTCATGTTGTTGGGcctgggtttctgaacaCAACAACATTAAACCACCCGAttcac	hsa-miR-196a-5p	TAGGTAGTTTCATGTTGTTGGG	5'	Yes	gp1a	......(((((((((..((((((..(((.((((.(((((((((.....((....)).....))))))))).)))).)))..))))))))))))).)).....	91	45.1	-36	42.5	46	8.5	38.6142	38.9114	11.3467	middle
133	176	hsa-miR-196a-5p	TAGGTAGTTTCATGTTGTTGGG	22	chr12	+	53991738	53991847	tgctcgctcagctgatctgtggctTAGGTAGTTTCATGTTGTTGGGattgagttttgaactcggcaacaagaaactgcctgagttacatcagtcggttttcgtcgagggc	22	hsa-mir-196a-2,ptr-mir-196a-2,ppy-mir-196-2,ggo-mir-196-2,ppa-mir-196,mml-mir-196a-2,oga-mir-196,dma-mir-196,cfa-mir-196a-2,cpo-mir-196c,pal-mir-196a,dno-mir-196a,ocu-mir-196a-2,tch-mir-196a,age-mir-196,lla-mir-196,mmu-mir-196a-2,bta-mir-196a-2,efu-mir-196,rno-mir-196a,ssc-mir-196a-2,cgr-mir-196a,	hsa-mir-196a-2	tgctcgctcagctgatctgtggctTAGGTAGTTTCATGTTGTTGGGattgagttttgaactCGGCAACAAGAAACTGCCTGAGttacatcagtcggttttcgtcgagggc	hsa-miR-196a-5p	TAGGTAGTTTCATGTTGTTGGG	5'	Yes	gp1a	..(((((..(((((((.(((..(((((((((((((.(((((..(((.(..(...)..).)))..))))).)))))))))))))..)))...)))))))...).))))...	105	48.2	-48.3	42.5	46	8.5	38.6142	38.9114	11.3467	middle
134	177	hsa-miR-197-3p	TTCACCACCTTCTCCACCCAGC	22	chr1	+	109598874	109598979	ctggaatctgtgctctgggggctgtgccgggtagagagggcagtgggaggtaagagctcttcacccTTCACCACCTTCTCCACCCAGCatggccggcacactttgg	16	hsa-mir-197,ptr-mir-197,ppy-mir-197,ppa-mir-197,mml-mir-197,age-mir-197,eca-mir-197,ggo-mir-197,cja-mir-197,oga-mir-197,mmr-mir-197,cfa-mir-197,cpo-mir-197,bta-mir-197,ocu-mir-197,chi-mir-197,	hsa-mir-197	ggctgtgcCGGGTAGAGAGGGCAGTGGGAGGtaagagctcttcacccTTCACCACCTTCTCCACCCAGCatggcc	hsa-miR-197-3p	TTCACCACCTTCTCCACCCAGC	3'	Yes	gp1a	(..((...((((((.....(((..(((.((((.(((((((..((((..((((((....))).)))..))))..))))))).)))).)))..))))))))).))..)	106	61.3	-50.4	10	0	21	9.08569	0	28.033	middle
135	178	hsa-miR-199a-5p	CCCAGTGTTCAGACTACCTGTTC	23	chr1	-	172144535	172144644	aggaagcttctggagatcctgctccgtcgcCCCAGTGTTCAGACTACCTGTTCaggacaatgccgttgtACAGTAGTCTGCACATTGGTTAgactgggcaagggagagca	31	hsa-mir-199a-2,ptr-mir-199a-2,ppy-mir-199a,ggo-mir-199a,ppa-mir-199a,mml-mir-199a-1,mne-mir-199a,sla-mir-199a,nle-mir-199a-2,oga-mir-199-1,mmr-mir-199-1,dma-mir-199,sbo-mir-199-2,pal-mir-199-1,tch-mir-199a,mmr-mir-199-2,lla-mir-199a,mmu-mir-199a-2,bta-mir-199a-1,oar-mir-199a,eca-mir-199a,mdo-mir-199b-2,cfa-mir-199-2,efu-mir-199-1,rno-mir-199a,cgr-mir-199a-2,ssc-mir-199a-1,cpo-mir-199-2,dno-mir-19…	hsa-mir-199a-2	aggaagcttctggagatcctgctccgtcgcCCCAGTGTTCAGACTACCTGTTCaggacaatgccgttgtACAGTAGTCTGCACATTGGTTAgactgggcaagggagagca	hsa-miR-199a-5p	CCCAGTGTTCAGACTACCTGTTC	5'	Yes	gp1a	.....((.(((.....((((((((.(((...(((((((.((((((((.(((...((......)).....))))))))))).)))))))...))).))))).)))))))).	104	53.6	-43	501.5	411	362	455.647	347.665	483.235	high
135	179	hsa-miR-199a-3p	ACAGTAGTCTGCACATTGGTTA	22	chr1	-	172144535	172144644	aggaagcttctggagatcctgctccgtcgcCCCAGTGTTCAGACTACCTGTTCaggacaatgccgttgtACAGTAGTCTGCACATTGGTTAgactgggcaagggagagca	31	hsa-mir-199a-2,ptr-mir-199a-2,ppy-mir-199a,ggo-mir-199a,ppa-mir-199a,mml-mir-199a-1,mne-mir-199a,sla-mir-199a,nle-mir-199a-2,oga-mir-199-1,mmr-mir-199-1,dma-mir-199,sbo-mir-199-2,pal-mir-199-1,tch-mir-199a,mmr-mir-199-2,lla-mir-199a,mmu-mir-199a-2,bta-mir-199a-1,oar-mir-199a,eca-mir-199a,mdo-mir-199b-2,cfa-mir-199-2,efu-mir-199-1,rno-mir-199a,cgr-mir-199a-2,ssc-mir-199a-1,cpo-mir-199-2,dno-mir-19…	hsa-mir-199a-2	aggaagcttctggagatcctgctccgtcgcCCCAGTGTTCAGACTACCTGTTCaggacaatgccgttgtACAGTAGTCTGCACATTGGTTAgactgggcaagggagagca	hsa-miR-199a-3p	ACAGTAGTCTGCACATTGGTTA	3'	Yes	gp1a	.....((.(((.....((((((((.(((...(((((((.((((((((.(((...((......)).....))))))))))).)))))))...))).))))).)))))))).	104	53.6	-43	806.667	774	547.333	732.912	654.726	730.637	high
136	180	hsa-miR-199b-5p	CCCAGTGTTTAGACTATCTGTTC	23	chr9	-	128244721	128244830	ccagaggacacctccactccgtctaCCCAGTGTTTAGACTATCTGTTCaggactcccaaattgtACAGTAGTCTGCACATTGGTTAggctgggctgggttagaccctcgg	21	hsa-mir-199b,ptr-mir-199b,ppa-mir-199b,nle-mir-199b,mmr-mir-199-3,pal-mir-199-3,cja-mir-199-2,eca-mir-199b,oga-mir-199-2,sbo-mir-199-3,tch-mir-199b,mmu-mir-199b,bta-mir-199b,mdo-mir-199b-1,cfa-mir-199-3,efu-mir-199-3,ssc-mir-199b,cpo-mir-199-3,dno-mir-199-2,chi-mir-199b,chi-mir-199c,	hsa-mir-199b	ccagaggacacctccactccgtctaCCCAGTGTTTAGACTATCTGTTCaggactcccaaattgtACAGTAGTCTGCACATTGGTTAggctgggctgggttagaccctcgg	hsa-miR-199b-5p	CCCAGTGTTTAGACTATCTGTTC	5'	Yes	gp1a	((.((((.....((((..(((((((.(((((((..((((((.((((.((((....))....)).))))))))))..))))))).))))).))..))))......))))))	110	52.7	-41.4	104	72	45	94.4912	60.9047	60.0707	middle
136	181	hsa-miR-199a-3p	ACAGTAGTCTGCACATTGGTTA	22	chr9	-	128244721	128244830	ccagaggacacctccactccgtctaCCCAGTGTTTAGACTATCTGTTCaggactcccaaattgtACAGTAGTCTGCACATTGGTTAggctgggctgggttagaccctcgg	21	hsa-mir-199b,ptr-mir-199b,ppa-mir-199b,nle-mir-199b,mmr-mir-199-3,pal-mir-199-3,cja-mir-199-2,eca-mir-199b,oga-mir-199-2,sbo-mir-199-3,tch-mir-199b,mmu-mir-199b,bta-mir-199b,mdo-mir-199b-1,cfa-mir-199-3,efu-mir-199-3,ssc-mir-199b,cpo-mir-199-3,dno-mir-199-2,chi-mir-199b,chi-mir-199c,	hsa-mir-199b	ccagaggacacctccactccgtctaCCCAGTGTTTAGACTATCTGTTCaggactcccaaattgtACAGTAGTCTGCACATTGGTTAggctgggctgggttagaccctcgg	hsa-miR-199a-3p	ACAGTAGTCTGCACATTGGTTA	3'	Yes	gp1a	((.((((.....((((..(((((((.(((((((..((((((.((((.((((....))....)).))))))))))..))))))).))))).))..))))......))))))	110	52.7	-41.4	806.667	774	547.333	732.912	654.726	730.637	high
137	182	hsa-miR-199a-5p	CCCAGTGTTCAGACTACCTGTTC	23	chr19	-	10817389	10817519	ctgcaggatggatagccggccccgccaaCCCAGTGTTCAGACTACCTGTTCaggaggctctcaatgtgtACAGTAGTCTGCACATTGGTTAggctgggcttgggtgagcggctcgtcgagacaggcccccc	15	hsa-mir-199a-1,ptr-mir-199a-1,mml-mir-199a-2,cja-mir-199-1,nle-mir-199a-1,sbo-mir-199-1,mmu-mir-199a-1,bta-mir-199a-2,cfa-mir-199-1,efu-mir-199-2,ssc-mir-199a-2,cpo-mir-199-1,pal-mir-199-2,ocu-mir-199a-1,cgr-mir-199a,	hsa-mir-199a-1	gccaaCCCAGTGTTCAGACTACCTGTTCaggaggctctcaatgtgtACAGTAGTCTGCACATTGGTTAggc	hsa-miR-199a-5p	CCCAGTGTTCAGACTACCTGTTC	5'	Yes	gp1a	.....((.....((.(((((((.(((...(((((((.((((((((.(((.((.(((...)))....)).))))))))))).)))))))...))).))))).)).))...(((..((....))..))).)).	94	60.3	-50.5	501.5	411	362	455.647	347.665	483.235	high
137	183	hsa-miR-199a-3p	ACAGTAGTCTGCACATTGGTTA	22	chr19	-	10817389	10817519	ctgcaggatggatagccggccccgccaaCCCAGTGTTCAGACTACCTGTTCaggaggctctcaatgtgtACAGTAGTCTGCACATTGGTTAggctgggcttgggtgagcggctcgtcgagacaggcccccc	15	hsa-mir-199a-1,ptr-mir-199a-1,mml-mir-199a-2,cja-mir-199-1,nle-mir-199a-1,sbo-mir-199-1,mmu-mir-199a-1,bta-mir-199a-2,cfa-mir-199-1,efu-mir-199-2,ssc-mir-199a-2,cpo-mir-199-1,pal-mir-199-2,ocu-mir-199a-1,cgr-mir-199a,	hsa-mir-199a-1	gccaaCCCAGTGTTCAGACTACCTGTTCaggaggctctcaatgtgtACAGTAGTCTGCACATTGGTTAggc	hsa-miR-199a-3p	ACAGTAGTCTGCACATTGGTTA	3'	Yes	gp1a	.....((.....((.(((((((.(((...(((((((.((((((((.(((.((.(((...)))....)).))))))))))).)))))))...))).))))).)).))...(((..((....))..))).)).	94	60.3	-50.5	806.667	774	547.333	732.912	654.726	730.637	high
138	184	hsa-miR-200c-3p	TAATACTGCCGGGTAATGATGGA	23	chr12	+	6963672	6963780	acccaaggtgggcgggctgggcgggggccctcgtcttacccagcagtgtttgggtgcggttgggagtctcTAATACTGCCGGGTAATGATGGAggcccctgtccctgtg	20	hsa-mir-200c,ppy-mir-200c,mml-mir-200c,ptr-mir-200c,ggo-mir-200c,cja-mir-200c,mmu-mir-200c,rno-mir-200c,bta-mir-200c,oar-mir-200c,eca-mir-200c,mdo-mir-200c,cfa-mir-200c,pal-mir-200c,ocu-mir-200c,efu-mir-200c,cpo-mir-200c,chi-mir-200c,cgr-mir-200c,tch-mir-200c,	hsa-mir-200c	ccctCGTCTTACCCAGCAGTGTTTGGgtgcggttgggagtctcTAATACTGCCGGGTAATGATGGAgg	hsa-miR-200c-3p	TAATACTGCCGGGTAATGATGGA	3'	Yes	gp1a	.(((.....)))...((.(((((((((((..((((((((((.((((((((.(((.((........))))).)))))))).)))))).))))..)))))))))))..)).	93	64.2	-60.8	53	106	24	48.1541	89.6653	32.0377	middle
139	185	hsa-miR-200b-5p	CATCTTACTGGGCAGCATTGGA	22	chr1	+	1167092	1167202	cggcccccggacccagctcgggcagccgtggcCATCTTACTGGGCAGCATTGGAtggagtcaggtctcTAATACTGCCTGGTAATGATGAcggcggagccctgcacgcagc	16	hsa-mir-200b,ggo-mir-200b,mmu-mir-200b,bta-mir-200b,oar-mir-200b,eca-mir-200b,mdo-mir-200b,cfa-mir-200b,efu-mir-200b,rno-mir-200b,ssc-mir-200b,cpo-mir-200b,pal-mir-200b,dno-mir-200b,cgr-mir-200b,tch-mir-200b,	hsa-mir-200b	ccagctcgggcagccgtggcCATCTTACTGGGCAGCATTGGAtggagtcaggtctcTAATACTGCCTGGTAATGATGAcggcggagccctgcacg	hsa-miR-200b-5p	CATCTTACTGGGCAGCATTGGA	5'	Yes	gp1a	.(((.....).))..((..((((.(((((...((((((((..(((((.((((((.((.......)))))))).)))))..)))).)))))))))...)))).)).......	89	64	-43.6	8	0	0	7.26855	0	0	low
139	186	hsa-miR-200b-3p	TAATACTGCCTGGTAATGATGA	22	chr1	+	1167092	1167202	cggcccccggacccagctcgggcagccgtggcCATCTTACTGGGCAGCATTGGAtggagtcaggtctcTAATACTGCCTGGTAATGATGAcggcggagccctgcacgcagc	16	hsa-mir-200b,ggo-mir-200b,mmu-mir-200b,bta-mir-200b,oar-mir-200b,eca-mir-200b,mdo-mir-200b,cfa-mir-200b,efu-mir-200b,rno-mir-200b,ssc-mir-200b,cpo-mir-200b,pal-mir-200b,dno-mir-200b,cgr-mir-200b,tch-mir-200b,	hsa-mir-200b	ccagctcgggcagccgtggcCATCTTACTGGGCAGCATTGGAtggagtcaggtctcTAATACTGCCTGGTAATGATGAcggcggagccctgcacg	hsa-miR-200b-3p	TAATACTGCCTGGTAATGATGA	3'	Yes	gp1a	.(((.....).))..((..((((.(((((...((((((((..(((((.((((((.((.......)))))))).)))))..)))).)))))))))...)))).)).......	89	64	-43.6	517	575	190	469.73	486.392	253.632	high
140	187	hsa-miR-200a-5p	CATCTTACCGGACAGTGCTGGA	22	chr1	+	1167846	1167956	gggaccccacgtccctcccgggcccctgtgagCATCTTACCGGACAGTGCTGGAtttcccagcttgactcTAACACTGTCTGGTAACGATGTtcaaaggtgacccgccgct	17	hsa-mir-200a,ptr-mir-200a,ppy-mir-200a,ggo-mir-200a,mml-mir-200a,mmu-mir-200a,cfa-mir-200a,bta-mir-200a,oar-mir-200a,eca-mir-200a,efu-mir-200a,rno-mir-200a,cpo-mir-200a,pal-mir-200a,chi-mir-200a,cgr-mir-200a,tch-mir-200a,	hsa-mir-200a	ccgggcccctgtgagCATCTTACCGGACAGTGCTGGAtttcccagcttgactcTAACACTGTCTGGTAACGATGTtcaaaggtgacccgc	hsa-miR-200a-5p	CATCTTACCGGACAGTGCTGGA	5'	Yes	gp1a	(((((.....)))))...((((..(((.(((((((((((((((((((((((((.....)))))...........)))))))))))).)))))))).)))...)))).....	88	59.5	-53.8	0	0	7	0	0	9.34433	low
140	188	hsa-miR-200a-3p	TAACACTGTCTGGTAACGATGT	22	chr1	+	1167846	1167956	gggaccccacgtccctcccgggcccctgtgagCATCTTACCGGACAGTGCTGGAtttcccagcttgactcTAACACTGTCTGGTAACGATGTtcaaaggtgacccgccgct	17	hsa-mir-200a,ptr-mir-200a,ppy-mir-200a,ggo-mir-200a,mml-mir-200a,mmu-mir-200a,cfa-mir-200a,bta-mir-200a,oar-mir-200a,eca-mir-200a,efu-mir-200a,rno-mir-200a,cpo-mir-200a,pal-mir-200a,chi-mir-200a,cgr-mir-200a,tch-mir-200a,	hsa-mir-200a	ccgggcccctgtgagCATCTTACCGGACAGTGCTGGAtttcccagcttgactcTAACACTGTCTGGTAACGATGTtcaaaggtgacccgc	hsa-miR-200a-3p	TAACACTGTCTGGTAACGATGT	3'	Yes	gp1a	(((((.....)))))...((((..(((.(((((((((((((((((((((((((.....)))))...........)))))))))))).)))))))).)))...)))).....	88	59.5	-53.8	315	501	151	286.199	423.795	201.57	high
141	189	hsa-miR-203a-3p	GTGAAATGTTTAGGACCACTAG	22	chr14	+	104117405	104117514	gtgttggggactcgcgcgctgggtccagtggttcttaacagttcaacagttctgtagcgcaattGTGAAATGTTTAGGACCACTAGacccggcgggcgcggcgacagcga	8	hsa-mir-203a,ptr-mir-203,ppy-mir-203,mml-mir-203,cja-mir-203,mmu-mir-203,cfa-mir-203,cpo-mir-203,	hsa-mir-203a	gtgttggggactcgcgcgctgggtccAGTGGTTCTTAACAGTTCAACAGTTctgtagcgcaattGTGAAATGTTTAGGACCACTAGacccggcgggcgcggcgacagcga	hsa-miR-203a-3p	GTGAAATGTTTAGGACCACTAG	3'	Yes	gp1a	.(((((......(((.(((((((((.(((((((((.((((.((((.((((..((.....)))))))))).)))).))))))))).))))))))).)))......))))).	108	57.3	-53.5	47	43	6	42.7027	36.3737	8.00942	middle
142	190	hsa-miR-205-5p	TCCTTCATTCCACCGGAGTCTG	22	chr1	+	209432133	209432242	aaagatcctcagacaatccatgtgcttctcttgTCCTTCATTCCACCGGAGTCTGtctcatacccaaccagatttcagtggagtgaagttcaggaggcatggagctgaca	21	hsa-mir-205,ptr-mir-205,ggo-mir-205,ppa-mir-205,ppy-mir-205,mml-mir-205,mne-mir-205,cja-mir-205,age-mir-205,lla-mir-205,mmu-mir-205,bta-mir-205,cfa-mir-205,eca-mir-205,efu-mir-205,rno-mir-205,ssc-mir-205,pal-mir-205,dno-mir-205,ocu-mir-205,cgr-mir-205,	hsa-mir-205	aaagatcctcagacaatccatgtgcttctcttgTCCTTCATTCCACCGGAGTCTGtctcatacccaaccaGATTTCAGTGGAGTGAAGTTCaggaggcatggagctgaca	hsa-miR-205-5p	TCCTTCATTCCACCGGAGTCTG	5'	Yes	gp1a	........((((....(((((((....((((((..(((((((((((.((((((((.............)))))))).)))))))))))..))))))))))))).))))..	100	48.2	-46.9	54	52	27	49.0627	43.9868	36.0424	middle
143	191	hsa-miR-210-3p	CTGTGCGTGTGACAGCGGCTGA	22	chr11	-	568089	568202	gcccacccggcagtgcctccaggcgcagggcagcccctgcccaccgcacactgcgctgccccagacccaCTGTGCGTGTGACAGCGGCTGAtctgtgcctgggcagcgcgaccc	17	hsa-mir-210,ptr-mir-210,ggo-mir-210,ppa-mir-210,nle-mir-210,mml-mir-210,oga-mir-210,mmu-mir-210,bta-mir-210,cfa-mir-210,efu-mir-210,rno-mir-210,ssc-mir-210,cpo-mir-210,dno-mir-210,cgr-mir-210,tch-mir-210,	hsa-mir-210	acccggcagtgcctccaggcgcagggcAGCCCCTGCCCACCGCACACTGcgctgccccagacccaCTGTGCGTGTGACAGCGGCTGAtctgtgcctgggcagcgcgaccc	hsa-miR-210-3p	CTGTGCGTGTGACAGCGGCTGA	3'	Yes	gp1a	(((.....))).((((.(((((((((((..(((((.(((..(((((((((.((..((.....))...)).)))))).))).))).)))))..)))))))))))..)))).....	97	73.7	-60.2	10	16	0	9.08569	13.5344	0	middle
144	192	hsa-miR-214-5p	TGCCTGTCTACACTTGCTGTGC	22	chr1	-	172138796	172138907	ggcctggctggacagagttgtcatgtgtcTGCCTGTCTACACTTGCTGTGCagaacatccgctcacctgtACAGCAGGCACAGACAGGCAGtcacatgacaacccagcctga	30	hsa-mir-214,ptr-mir-214,ppy-mir-214,ggo-mir-214,ppa-mir-214,mml-mir-214,mne-mir-214,age-mir-214,sla-mir-214,mmu-mir-214,cja-mir-214,nle-mir-214,oga-mir-214,mmr-mir-214,dma-mir-214,cpo-mir-214,pal-mir-214,dno-mir-214,ocu-mir-214,sbo-mir-214,bta-mir-214,cfa-mir-214,ssc-mir-214,aja-mir-214,eca-mir-214,mdo-mir-214,efu-mir-214,rno-mir-214,chi-mir-214,cgr-mir-214,	hsa-mir-214	ggcctggctggacagagttgtcatgtgtcTGCCTGTCTACACTTGCTGTGCagaacatccgctcacctgtACAGCAGGCACAGACAGGCAGTcacatgacaacccagcct	hsa-miR-214-5p	TGCCTGTCTACACTTGCTGTGC	5'	Yes	gp1a	.....((((((.....(((((((((((.((((((((((...((((((((((((.............))))))))))))...)))))))))).)))))))))))))))))...	104	56.2	-67.6	0	5	0	0	4.2295	0	low
144	193	hsa-miR-214-3p_R-1	ACAGCAGGCACAGACAGGCAG	21	chr1	-	172138796	172138907	ggcctggctggacagagttgtcatgtgtcTGCCTGTCTACACTTGCTGTGCagaacatccgctcacctgtACAGCAGGCACAGACAGGCAGtcacatgacaacccagcctga	30	hsa-mir-214,ptr-mir-214,ppy-mir-214,ggo-mir-214,ppa-mir-214,mml-mir-214,mne-mir-214,age-mir-214,sla-mir-214,mmu-mir-214,cja-mir-214,nle-mir-214,oga-mir-214,mmr-mir-214,dma-mir-214,cpo-mir-214,pal-mir-214,dno-mir-214,ocu-mir-214,sbo-mir-214,bta-mir-214,cfa-mir-214,ssc-mir-214,aja-mir-214,eca-mir-214,mdo-mir-214,efu-mir-214,rno-mir-214,chi-mir-214,cgr-mir-214,	hsa-mir-214	ggcctggctggacagagttgtcatgtgtcTGCCTGTCTACACTTGCTGTGCagaacatccgctcacctgtACAGCAGGCACAGACAGGCAGTcacatgacaacccagcct	hsa-miR-214-3p	ACAGCAGGCACAGACAGGCAGT	3'	Diff	gp1a	.....((((((.....(((((((((((.((((((((((...((((((((((((.............))))))))))))...)))))))))).)))))))))))))))))...	104	56.2	-67.6	0	13	5	0	10.9967	6.67452	middle
145	194	hsa-miR-215-5p_L-1R+2_1ss20AC	TGACCTATGAATTGACAGCCAA	22	chr1	-	220117853	220117962	atcattcagaaatggtatacaggaaaaTGACCTATGAATTGACAGACAAtatagctgagtttgtctgtcatttctttaggccaatattctgtatgactgtgctacttcaa	8	hsa-mir-215,ptr-mir-215,ggo-mir-215,ppy-mir-215,cja-mir-215,bta-mir-215,eca-mir-215,dno-mir-215,	hsa-mir-215	atcattcagaaatggtatacaggaaaATGACCTATGAATTGACAGACaatatagctgagtttgTCTGTCATTTCTTTAGGCCAATAttctgtatgactgtgctacttcaa	hsa-miR-215-5p	ATGACCTATGAATTGACAGAC	5'	Diff	gp1a	........(((.((((((((((((...((.((((.(((.((((((((((...........)))))))))).)))..)))).))...))))))))......)))).)))..	100	34.5	-33.2	3.5	0	0	3.17999	0	0	low
146	195	hsa-miR-218-5p_R+2	TTGTGCTTGATCTAACCATGTGA	23	chr4	+	20528252	20528417	cctttggcctagtggttggtgtagtgataatgtagcgagattttctgTTGTGCTTGATCTAACCATGTGGttgcgaggtatgagtaaaacatggttccgtcaagcaccatggaacgtcacgcagctttctacagcatgacaagctgctgaggcttaaatcaggatt	30	hsa-mir-218-1,ptr-mir-218-1,ppy-mir-218-1,ggo-mir-218,ppa-mir-218-1,age-mir-218,lla-mir-218-1,sla-mir-218-1,mml-mir-218-1,cja-mir-218,nle-mir-218-1,cpo-mir-218-1,ocu-mir-218-1,tch-mir-218-2,tch-mir-218-1,oga-mir-218a,mmr-mir-218a,cfa-mir-218-1,dno-mir-218-1,mne-mir-218-1,lca-mir-218,mmu-mir-218-1,bta-mir-218-1,eca-mir-218-1,mdo-mir-218-1,efu-mir-218a,rno-mir-218a-1,ssc-mir-218-1,ssc-mir-218-2,pal…	hsa-mir-218-1	gtgataatgtagcgagattttctgTTGTGCTTGATCTAACCATGTggttgcgaggtatgagtaaaacATGGTTCCGTCAAGCACCATGGaacgtcacgcagctttctaca	hsa-miR-218-5p	TTGTGCTTGATCTAACCATGT	5'	Diff	gp1a	(((..(((((((..((((.(((((.......(..(((.((..(((..(.(((((((((..((((((((..((((.........)))).))))))))..))))))))).)..)))..)).)))..)...))))).))......))..)).)))))......)))...	163	45.8	-59.5	7.5	13.5	0	6.81427	11.4196	0	middle
147	196	hsa-miR-218-5p_R+2	TTGTGCTTGATCTAACCATGTGA	23	chr5	-	168768146	168768255	gaccagtcgctgcggggctttcctTTGTGCTTGATCTAACCATGTGGtggaacgatggaaacggaacatggttctgtcaagcaccgcggaaagcaccgtgctctcctgca	25	hsa-mir-218-2,ptr-mir-218-2,ppa-mir-218-2,mml-mir-218-2,mne-mir-218-2,lla-mir-218-2,ppy-mir-218-2,nle-mir-218-2,mmr-mir-218b,cfa-mir-218-2,cpo-mir-218-2,pal-mir-218-2,dno-mir-218-2,ocu-mir-218-2,sla-mir-218-2,mmu-mir-218-2,rno-mir-218a-2,bta-mir-218-2,oar-mir-218a,eca-mir-218-2,mdo-mir-218-2,efu-mir-218b,ssc-mir-218b,chi-mir-218,cgr-mir-218a,	hsa-mir-218-2	gaccagtcgctgcggggctttcctTTGTGCTTGATCTAACCATGTggtggaacgatggaaacggaaCATGGTTCTGTCAAGCACCGCGgaaagcaccgtgctctcctgca	hsa-miR-218-5p	TTGTGCTTGATCTAACCATGT	5'	Diff	gp1a	...(((..((.((((.(((((((...(((((((((..((((((((..........((....))..))))))))..)))))))))...))))))).))))))....)))..	105	55.5	-46.3	7.5	13.5	0	6.81427	11.4196	0	middle
148	197	hsa-miR-221-5p_R+2	ACCTGGCATACAATGTAGATTTCT	24	X	-	45746157	45746266	tgaacatccaggtctggggcatgaACCTGGCATACAATGTAGATTTCTgtgttcgttaggcaacAGCTACATTGTCTGCTGGGTTTCaggctacctggaaacatgttctc	27	hsa-mir-221,ppy-mir-221,ggo-mir-221,ppa-mir-221,mml-mir-221,ptr-mir-221,nle-mir-221,oga-mir-221,mmr-mir-221,dma-mir-221,sbo-mir-221,mmu-mir-221,bta-mir-221,chi-mir-221,oar-mir-221,eca-mir-221,mdo-mir-221,cfa-mir-221,efu-mir-221,rno-mir-221,ssc-mir-221,cpo-mir-221,pal-mir-221,dno-mir-221,ocu-mir-221,cgr-mir-221,tch-mir-221,	hsa-mir-221	tgaacatccaggtctggggcatgaACCTGGCATACAATGTAGATTTctgtgttcgttaggcaacAGCTACATTGTCTGCTGGGTTTCaggctacctggaaacatgttctc	hsa-miR-221-5p	ACCTGGCATACAATGTAGATTT	5'	Diff	gp1a	.((((((((((((....(((.((((((..(((.(((((((((....((((..((....))..))))))))))))).)))..)))).)).))))))))))....)))))..	107	47.3	-47	34	17	17	30.8913	14.3803	22.6934	middle
148	198	hsa-miR-221-3p	AGCTACATTGTCTGCTGGGTTTC	23	X	-	45746157	45746266	tgaacatccaggtctggggcatgaACCTGGCATACAATGTAGATTTCTgtgttcgttaggcaacAGCTACATTGTCTGCTGGGTTTCaggctacctggaaacatgttctc	27	hsa-mir-221,ppy-mir-221,ggo-mir-221,ppa-mir-221,mml-mir-221,ptr-mir-221,nle-mir-221,oga-mir-221,mmr-mir-221,dma-mir-221,sbo-mir-221,mmu-mir-221,bta-mir-221,chi-mir-221,oar-mir-221,eca-mir-221,mdo-mir-221,cfa-mir-221,efu-mir-221,rno-mir-221,ssc-mir-221,cpo-mir-221,pal-mir-221,dno-mir-221,ocu-mir-221,cgr-mir-221,tch-mir-221,	hsa-mir-221	tgaacatccaggtctggggcatgaACCTGGCATACAATGTAGATTTctgtgttcgttaggcaacAGCTACATTGTCTGCTGGGTTTCaggctacctggaaacatgttctc	hsa-miR-221-3p	AGCTACATTGTCTGCTGGGTTTC	3'	Yes	gp1a	.((((((((((((....(((.((((((..(((.(((((((((....((((..((....))..))))))))))))).)))..)))).)).))))))))))....)))))..	107	47.3	-47	1528	1658	1204	1388.29	1402.5	1607.22	high
149	199	hsa-miR-222-3p_R+4	AGCTACATCTGGCTACTGGGTCTCT	25	X	-	45747004	45747126	cagctgctggaaggtgtaggtaccctcaatggctcagtagccagtgtagatcctgtctttcgtaatcagcAGCTACATCTGGCTACTGGGTCTCTgatggcatcttctagcttctgcttcagt	26	hsa-mir-222,ppy-mir-222,ptr-mir-222,ggo-mir-222,ppa-mir-222,nle-mir-222,mml-mir-222,cja-mir-222-1,oga-mir-222,mmr-mir-222,dma-mir-222,age-mir-222,mmu-mir-222,bta-mir-222,eca-mir-222,cfa-mir-222,efu-mir-222,rno-mir-222,ssc-mir-222,cpo-mir-222,dno-mir-222,pal-mir-222,ocu-mir-222,chi-mir-222,cgr-mir-222,tch-mir-222,	hsa-mir-222	gctgctggaaggtgtaggtaccctcaatggCTCAGTAGCCAGTGTAGATCCTgtctttcgtaatcagcAGCTACATCTGGCTACTGGGTctctgatggcatcttctagct	hsa-miR-222-3p	AGCTACATCTGGCTACTGGGT	3'	Diff	gp1a	(((..(((((((((((......((.(((..(((((((((((((((((((...(((...........)))...))))).))))))))))))))..))).)))))))))))))..))).......	116	50.4	-57.2	398	337	330	361.61	285.068	440.518	high
150	200	hsa-miR-223-5p_R+1	CGTGTATTTGACAAGCTGAGTTG	23	X	+	66018867	66018992	tggcctggcctcctgcagtgccacgctcCGTGTATTTGACAAGCTGAGTTGgacactccatgtggtagagTGTCAGTTTGTCAAATACCCCAAgtgcggcacatgcttaccagctctaggccaggg	19	hsa-mir-223,ptr-mir-223,ggo-mir-223,ppa-mir-223,ppy-mir-223,mml-mir-223,cja-mir-223,sla-mir-223,mmu-mir-223,bta-mir-223,eca-mir-223,cfa-mir-223,efu-mir-223,rno-mir-223,ssc-mir-223,cpo-mir-223,dno-mir-223,ocu-mir-223,chi-mir-223,	hsa-mir-223	cctggcctcctgcagtgccacgctcCGTGTATTTGACAAGCTGAGTTggacactccatgtggtagagTGTCAGTTTGTCAAATACCCCAagtgcggcacatgcttaccag	hsa-miR-223-5p	CGTGTATTTGACAAGCTGAGTT	5'	Diff	gp1a	...((((((((......(((((.((((....((((((((((((((......(((((((.........)))))))))))))))))))))....)))).)))))..(((....)))...)))))))).	85	55.6	-58.1	18	8	19	16.3542	6.76719	25.3632	middle
150	201	hsa-miR-223-3p_R+1	TGTCAGTTTGTCAAATACCCCAA	23	X	+	66018867	66018992	tggcctggcctcctgcagtgccacgctcCGTGTATTTGACAAGCTGAGTTGgacactccatgtggtagagTGTCAGTTTGTCAAATACCCCAAgtgcggcacatgcttaccagctctaggccaggg	19	hsa-mir-223,ptr-mir-223,ggo-mir-223,ppa-mir-223,ppy-mir-223,mml-mir-223,cja-mir-223,sla-mir-223,mmu-mir-223,bta-mir-223,eca-mir-223,cfa-mir-223,efu-mir-223,rno-mir-223,ssc-mir-223,cpo-mir-223,dno-mir-223,ocu-mir-223,chi-mir-223,	hsa-mir-223	cctggcctcctgcagtgccacgctcCGTGTATTTGACAAGCTGAGTTggacactccatgtggtagagTGTCAGTTTGTCAAATACCCCAagtgcggcacatgcttaccag	hsa-miR-223-3p	TGTCAGTTTGTCAAATACCCCA	3'	Diff	gp1a	...((((((((......(((((.((((....((((((((((((((......(((((((.........)))))))))))))))))))))....)))).)))))..(((....)))...)))))))).	85	55.6	-58.1	2296	1491	1114	2086.07	1261.24	1487.08	high
151	202	hsa-miR-224-5p_L-1	CAAGTCACTAGTGGTTCCGTTTAG	24	X	-	151958578	151958658	gggctttCAAGTCACTAGTGGTTCCGTTTAGtagatgattgtgcattgtttcaaaatggtgccctagtgactacaaagccc	18	hsa-mir-224,ptr-mir-224,ppy-mir-224,ggo-mir-224,ppa-mir-224,mml-mir-224,mne-mir-224,nle-mir-224,oga-mir-224,mmu-mir-224,bta-mir-224,chi-mir-224,eca-mir-224,cfa-mir-224,rno-mir-224,ssc-mir-224,cpo-mir-224,ocu-mir-224,	hsa-mir-224	gggcttTCAAGTCACTAGTGGTTCCGTTTAGtagatgattgtgcattgtttcAAAATGGTGCCCTAGTGACTACAaagccc	hsa-miR-224-5p	TCAAGTCACTAGTGGTTCCGTTTAG	5'	Diff	gp1a	(((((((..(((((((((.((..((((((....((((......))))......))))))..)))))))))))..)))))))	81	44.4	-35.2	118	76	68	107.211	64.2883	90.7734	middle
152	203	hsa-miR-299-3p	TATGTGGGATGGTAAACCGCTT	22	chr14	+	101023794	101023856	aagaaatggtttaccgtcccacatacattttgaatatgTATGTGGGATGGTAAACCGCTTctt	3	hsa-mir-299,eca-mir-299,dno-mir-299,	hsa-mir-299	aagaaaTGGTTTACCGTCCCACATACATtttgaatatgTATGTGGGATGGTAAACCGCTTctt	hsa-miR-299-3p	TATGTGGGATGGTAAACCGCTT	3'	Yes	gp1a	(((((..(((((((((((((((((((((.......)))))))))))))))))))))..)))))	63	38.1	-40.1	9	0	0	8.17712	0	0	low
153	204	hsa-miR-301a-3p	CAGTGCAATAGTATTGTCAAAGC	23	chr17	-	59151136	59151221	actgctaacgaatgctctgactttattgcactactgtactttacagctagCAGTGCAATAGTATTGTCAAAGCatctgaaagcagg	20	hsa-mir-301a,mml-mir-301a,eca-mir-301a,ptr-mir-301a,bta-mir-301a,mdo-mir-301,chi-mir-301a,ppy-mir-301a,ggo-mir-301a,cja-mir-301a,nle-mir-301a,oga-mir-301a,mmr-mir-301a,mmu-mir-301a,cfa-mir-301a,cpo-mir-301a,pal-mir-301a,dno-mir-301a,ocu-mir-301a,cgr-mir-301a,	hsa-mir-301a	actgctaacgaatGCTCTGACTTTATTGCACTACTgtactttacagctagCAGTGCAATAGTATTGTCAAAGCatctgaaagcagg	hsa-miR-301a-3p	CAGTGCAATAGTATTGTCAAAGC	3'	Yes	gp1a	.(((((..(..(((((.((((.((((((((((.(((((...))))).....))))))))))....)))).)))))..)..))))).	84	40.7	-31.1	0	0	6	0	0	8.00942	low
154	205	hsa-mir-302c-p3_1ss3AG	TGGAACAAAAGTAAGTGCTT	20	chr4	-	112648356	112648433	tcccctttgctttaacatgggggtacctgctgtgTGAAACAAAAGTAAGTGCTTccatgtttcagtggaggtgtctcc	6	hsa-mir-302c,ppy-mir-302c,mml-mir-302c,ocu-mir-302c,ptr-mir-302c,cja-mir-302c,	hsa-mir-302c	cctttgcTTTAACATGGGGGTACCTGCTGtgtgaaacaaaagTAAGTGCTTCCATGTTTCAGTGGagg	hsa-mir-302c-p3	tgaaacaaaagTAAGTGCTT	3'	New	gp1a	...((((..((..(((((((..((((.((((.((.....))..)))).))))..)))))))..))..)))).......	68	47.4	-33	0	0	5	0	0	6.67452	low
155	206	hsa-miR-320d_R-1	AAAAGCTGGGTTGAGAGG	18	chr13	-	40727816	40727887	aaaatgttggccttctcgtcccagttcttcccaaagttgagAAAAGCTGGGTTGAGAGGatgaaaagaaaaa	3	hsa-mir-320d-1,ptr-mir-320d-1,ppy-mir-320d-1,	hsa-mir-320d-1	aaaatgttggccttctcgtcccagttcttcccaaagttgagAAAAGCTGGGTTGAGAGGAtgaaaagaaaaa	hsa-miR-320d	AAAAGCTGGGTTGAGAGGA	3'	Diff	gp1a	...........((((((..(((((((.(((.((....)).))).)))))))..)))))).............	48	41.7	-22.5	1.28571	1.28571	0.857143	1.16816	1.08758	1.1442	low
156	207	hsa-miR-320b_R-2	AAAAGCTGGGTTGAGAGGGC	20	chr1	+	116671746	116671827	ataaattaatccctctctttctagttcttcctagagtgaggAAAAGCTGGGTTGAGAGGGCaaacaaattaactaattaatt	6	hsa-mir-320b-1,ptr-mir-320b-1,ppy-mir-320b-1,ggo-mir-320a-2,ppa-mir-320b-1,nle-mir-320b-1,	hsa-mir-320b-1	ataaattaatccctctctttctagttcttcctagagtgaggAAAAGCTGGGTTGAGAGGGCAAacaaattaa	hsa-miR-320b	AAAAGCTGGGTTGAGAGGGCAA	3'	Diff	gp1a	..........(((((((..(((((((.(((((......))))).)))))))..)))))))......................	50	34.1	-28	32.2857	31.1524	43.3571	29.3338	26.3518	57.8776	middle
157	208	hsa-miR-320c_R-1	AAAAGCTGGGTTGAGAGGG	19	chr18	+	24321675	24321746	gcatgacaggccttctctttccagttcttcccagaattgggAAAAGCTGGGTTGAGAGGGtaagaaaagaaa	4	hsa-mir-320c-2,ptr-mir-320c-2,ppy-mir-320c-2,nle-mir-320c-2,	hsa-mir-320c-2	gcatgacaggccttctctttccagttcttcccagaattgggAAAAGCTGGGTTGAGAGGGTaagaaaagaaa	hsa-miR-320c	AAAAGCTGGGTTGAGAGGGT	3'	Diff	gp1a	.........((((((((..(((((((.(((((......))))).)))))))..))))))))...........	52	45.8	-32.6	13.7857	15.9857	11.8571	12.5253	13.5223	15.8281	middle
158	209	hsa-miR-320a-3p	AAAAGCTGGGTTGAGAGGGCGA	22	chr8	-	22244955	22245065	gccacagtatttatcaggcggcgcttcgctcccctccgccttctcttcccggttcttcccggagtcgggAAAAGCTGGGTTGAGAGGGCGAaaaaggatgaggtgactggt	22	hsa-mir-320a,ptr-mir-320a,ppy-mir-320a,ggo-mir-320a,ppa-mir-320a,nle-mir-320a,oga-mir-320a,mmr-mir-320a-4,mmr-mir-320a-1,mmr-mir-320a-3,cfa-mir-320,pal-mir-320,mml-mir-320a,cja-mir-320-1,mmr-mir-320a-2,mmu-mir-320,bta-mir-320a-1,efu-mir-320,rno-mir-320,ssc-mir-320,chi-mir-320,cgr-mir-320a,	hsa-mir-320a	ctcccctccGCCTTCTCTTCCCGGTTCTTCCcggagtcgggAAAAGCTGGGTTGAGAGGGCGAaaaaggatg	hsa-miR-320a-3p	AAAAGCTGGGTTGAGAGGGCGA	3'	Yes	gp1a	..................((((((((((.(((....(((((((((..(((((((.((((((....)))))).)))))))..))))))))).....)))))))))).)))..	91	58.6	-52.8	6313.29	9583.15	12842.9	5736.05	8106.38	17144	high
159	210	hsa-miR-320d_R-1	AAAAGCTGGGTTGAGAGG	18	X	-	140926160	140926231	tatcaataagccttctcttcccagttcttcttggagtcaggAAAAGCTGGGTTGAGAGGagcagaaaagaaa	3	hsa-mir-320d-2,ptr-mir-320d-3,ppy-mir-320d-2,	hsa-mir-320d-2	tatcaataagccttctcttcccagttcttcttggagtcaggAAAAGCTGGGTTGAGAGGAgcagaaaagaaa	hsa-miR-320d	AAAAGCTGGGTTGAGAGGA	3'	Diff	gp1a	.........((((((((..(((((((.((((((....)))))).)))))))..)))))).))..........	53	43.1	-29.5	1.28571	1.28571	0.857143	1.16816	1.08758	1.1442	low
160	211	hsa-miR-320b_R-2	AAAAGCTGGGTTGAGAGGGC	20	chr1	-	224257004	224257141	tgttattttttgtcttctacctaagaattctgtctcttaggctttctcttcccagatttcccaaagttgggAAAAGCTGGGTTGAGAGGGCaaaaggaaaaaaaaagaattctgtctctgacataattagatagggaa	5	hsa-mir-320b-2,ptr-mir-320b-2,ppy-mir-320b-2,ppa-mir-320b-2,mml-mir-320b,	hsa-mir-320b-2	gtctcttaggctttctcttcccagatttcccaaagttgggAAAAGCTGGGTTGAGAGGGCAAaaggaaaaa	hsa-miR-320b	AAAAGCTGGGTTGAGAGGGCAA	3'	Diff	gp1a	.....(((..(((((........((((((((...((((..((..((((..(((((.(((((((....)))))))..)))))..))))..))...)))).......))))))))(((...)))......)))))..)))	90	37	-44.3	32.2857	31.1524	43.3571	29.3338	26.3518	57.8776	middle
161	212	hsa-miR-320c_R-1	AAAAGCTGGGTTGAGAGGG	19	chr18	+	21683510	21683597	tttgcattaaaaatgaggccttctcttcccagttcttcccagagtcaggAAAAGCTGGGTTGAGAGGGtagaaaaaaaatgatgtagg	4	hsa-mir-320c-1,ptr-mir-320c-1,ppy-mir-320c-1,nle-mir-320c-1,	hsa-mir-320c-1	aaaaatgaggccttctcttcccagttcttcccagagtcaggAAAAGCTGGGTTGAGAGGGTagaaaaaaaat	hsa-miR-320c	AAAAGCTGGGTTGAGAGGGT	3'	Diff	gp1a	.((((((((........((((((((..(((((((.((((........)))).)))))))..))))))))..........)))))))).	52	42	-34.5	13.7857	15.9857	11.8571	12.5253	13.5223	15.8281	middle
162	213	hsa-miR-323b-3p_R-1	CCCAATACACGGTCGACCTCT	21	chr14	+	101056199	101056306	ctgcgagcagtgccacctcatggtactcggagggaggttgtccgtggtgagttcgcattatttaatgatgCCCAATACACGGTCGACCTCTtttcggtatcagatctc	4	hsa-mir-323b,ggo-mir-323b,mml-mir-323b,cja-mir-323,	hsa-mir-323b	tggtactcggagggAGGTTGTCCGTGGTGAGTTCGCAttatttaatgatgCCCAATACACGGTCGACCTCTTttcggtatca	hsa-miR-323b-3p	CCCAATACACGGTCGACCTCTT	3'	Diff	gp1a	(((....))).......((.((((((.((((..(((((((.(((((........(((((((...)))))))......))))).)))))))..))))))))))))....	87	51.9	-42.3	47	34	45	42.7027	28.7606	60.0707	middle
163	214	hsa-miR-323a-3p	CACATTACACGGTCGACCTCT	21	chr14	+	101025712	101025825	ggtgtcagtacggctgctgcttggtacttggagagaggtggtccgtggcgcgttcgctttatttatggcgCACATTACACGGTCGACCTCTttgcagtatctaatcccgccttg	19	hsa-mir-323a,ppy-mir-323,mml-mir-323a,bta-mir-323,eca-mir-323,ptr-mir-323,ggo-mir-323a,ppa-mir-323,cfa-mir-323,pal-mir-323,ocu-mir-323a,mmu-mir-323,rno-mir-323,efu-mir-323,ssc-mir-323,cpo-mir-323a,dno-mir-323a,chi-mir-323a,oar-mir-323a,	hsa-mir-323a	ttggtacttggagagAGGTGGTCCGTGGCGCGTTCGCtttatttatggcgCACATTACACGGTCGACCTCTttgcagtatctaatc	hsa-miR-323a-3p	CACATTACACGGTCGACCTCT	3'	Yes	gp1a	((((.(((((....)))))...(((((.((.((((((((((.(((((....((.((((........)))).))....))))))).)))))))).)))))))......))))...	79	54.4	-42	18	32	18	16.3542	27.0688	24.0283	middle
164	215	hsa-miR-324-5p_R+1	CGCATCCCCTAGGGCATTGGTGT	23	chr17	-	7223273	7223384	ctgagctgactatgcctcccCGCATCCCCTAGGGCATTGGTGTaaagctggagacccactgccccaggtgctgctgggggttgtagtctgacccgactgggaagaaagcccc	22	hsa-mir-324,ppy-mir-324,mml-mir-324,eca-mir-324,ptr-mir-324,ggo-mir-324,cja-mir-324,nle-mir-324,pal-mir-324,tch-mir-324,mmr-mir-324,mmu-mir-324,bta-mir-324,cfa-mir-324,efu-mir-324,rno-mir-324,ssc-mir-324,cpo-mir-324,dno-mir-324,ocu-mir-324,chi-mir-324,cgr-mir-324,	hsa-mir-324	ctgactatgcctcccCGCATCCCCTAGGGCATTGGTGtaaagctggagaCCCACTGCCCCAGGTGCTGCTGGgggttgtagtc	hsa-miR-324-5p	CGCATCCCCTAGGGCATTGGTG	5'	Diff	gp1a	....(((((((((..(((((.(((...(((.(((((.(((.((..........))))).))))).)))...))).)))))..))))))...(((....))).....)))...	81	61.6	-43.6	0	6	0	0	5.07539	0	low
165	216	hsa-miR-328-3p	CTGGCCCTCTCTGCCCTTCCGT	22	chr16	-	67202308	67202418	aagtcctgggctgtctcagagcctggagtgggggggcaggaggggctcagggagaaagtgcatacagcccCTGGCCCTCTCTGCCCTTCCGTcccctgctcttggccatgc	17	hsa-mir-328,ptr-mir-328,ppy-mir-328,ggo-mir-328,ppa-mir-328,mml-mir-328,cja-mir-328,mmr-mir-328,mmu-mir-328,bta-mir-328,eca-mir-328,cfa-mir-328,ssc-mir-328,dno-mir-328,ocu-mir-328,cgr-mir-328,tch-mir-328,	hsa-mir-328	tggagtGGGGGGGCAGGAGGGGCTCAGGGagaaagtgcatacagcccCTGGCCCTCTCTGCCCTTCCGTcccctg	hsa-miR-328-3p	CTGGCCCTCTCTGCCCTTCCGT	3'	Yes	gp1a	........((((.....(((((..((..(((..((((((..(((((.(((((.......((.....))))))))))))..))))))..)))..))..))))).))))....	99	65.8	-58.8	46	50	61	41.7942	42.295	81.4291	middle
166	217	hsa-miR-329-3p	AACACACCTGGTTAACCTCTTT	22	chr14	+	101026759	101026877	tggtgttcttgtcagtgttaatcagtggtacctgaagagaggttttctgggtttctgtttctttaatgaggacgaAACACACCTGGTTAACCTCTTTtccagtatcaaatcccatcttg	11	hsa-mir-329-1,ptr-mir-329-1,ppy-mir-329-1,cfa-mir-329b,mml-mir-329-1,mml-mir-329-2,cja-mir-329,bta-mir-329b,pal-mir-329b,chi-mir-329b,oar-mir-329b,	hsa-mir-329-1	ggtacctgaagaGAGGTTTTCTGGGTTTCTGTTTCtttaatgaggacgaAACACACCTGGTTAACCTCTTTtccagtatc	hsa-miR-329-3p	AACACACCTGGTTAACCTCTTT	3'	Yes	gp1a	.((((..........((.....)).((((((..(((((((((((..(..(((...((((((.((......)).)))))).)))..)..)))))))))))..)))))).....))))...	82	41.2	-35.9	5.5	6.5	3	4.99713	5.49834	4.00471	low
167	218	hsa-miR-329-3p	AACACACCTGGTTAACCTCTTT	22	chr14	+	101027081	101027183	ttcttgtcagtgttacttggtggtacctgaagagaggttttctgggtttctgtttctttattgaggacgaAACACACCTGGTTAACCTCTTTtccagtatcaa	4	hsa-mir-329-2,ptr-mir-329-2,ppy-mir-329-2,ggo-mir-329b,	hsa-mir-329-2	gtggtacctgaagaGAGGTTTTCTGGGTTTCTGTTTCtttattgaggacgaAACACACCTGGTTAACCTCTTTtccagtatcaa	hsa-miR-329-3p	AACACACCTGGTTAACCTCTTT	3'	Yes	gp1a	....................((((((..(((((((((((..(..(((...((((((.((......)).)))))).)))..)..)))))))))))..)))))).	82	40.8	-35	5.5	6.5	3	4.99713	5.49834	4.00471	low
168	219	hsa-miR-330-5p_R+1	TCTCTGGGCCTGTGTCTTAGGCT	23	chr19	-	45638957	45639125	ttccaggatcgcgtccctgccacttcgtgctgtgtgatctttggcgatcactgccTCTCTGGGCCTGTGTCTTAGGCTctgcaagatcaaccgaGCAAAGCACACGGCCTGCAGAGAggcagcgctctgccccttactcggccccgttttcatcggagacctccgggga	19	hsa-mir-330,ppy-mir-330,mml-mir-330,ptr-mir-330,ggo-mir-330,cja-mir-330,oga-mir-330,tch-mir-330,mmu-mir-330,bta-mir-330,cfa-mir-330,efu-mir-330,rno-mir-330,ssc-mir-330,cpo-mir-330,pal-mir-330,dno-mir-330,chi-mir-330,cgr-mir-330,	hsa-mir-330	ctttggcgatcactgccTCTCTGGGCCTGTGTCTTAGGCtctgcaagatcaaccgaGCAAAGCACACGGCCTGCAGAGAggcagcgctctgccc	hsa-miR-330-5p	TCTCTGGGCCTGTGTCTTAGGC	5'	Diff	gp1a	((((.(((....(((.(((......((.((((.((((.....(((((...(((((((((((((((((((.(((..((((.............)))).))))))).))))..)))))))))))...)).)))..)))).))))..)).......))).))).))).))))	121	60.4	-63.3	0	5	0	0	4.2295	0	low
168	220	hsa-miR-330-3p	GCAAAGCACACGGCCTGCAGAGA	23	chr19	-	45638957	45639125	ttccaggatcgcgtccctgccacttcgtgctgtgtgatctttggcgatcactgccTCTCTGGGCCTGTGTCTTAGGCTctgcaagatcaaccgaGCAAAGCACACGGCCTGCAGAGAggcagcgctctgccccttactcggccccgttttcatcggagacctccgggga	19	hsa-mir-330,ppy-mir-330,mml-mir-330,ptr-mir-330,ggo-mir-330,cja-mir-330,oga-mir-330,tch-mir-330,mmu-mir-330,bta-mir-330,cfa-mir-330,efu-mir-330,rno-mir-330,ssc-mir-330,cpo-mir-330,pal-mir-330,dno-mir-330,chi-mir-330,cgr-mir-330,	hsa-mir-330	ctttggcgatcactgccTCTCTGGGCCTGTGTCTTAGGCtctgcaagatcaaccgaGCAAAGCACACGGCCTGCAGAGAggcagcgctctgccc	hsa-miR-330-3p	GCAAAGCACACGGCCTGCAGAGA	3'	Yes	gp1a	((((.(((....(((.(((......((.((((.((((.....(((((...(((((((((((((((((((.(((..((((.............)))).))))))).))))..)))))))))))...)).)))..)))).))))..)).......))).))).))).))))	121	60.4	-63.3	7	5	7	6.35998	4.2295	9.34433	low
169	221	hsa-miR-331-5p_R-2	CTAGGTATGGTCCCAGGGAT	20	chr12	+	95308410	95308520	cactcccaaggagtttggttttgtttgggtttgttCTAGGTATGGTCCCAGGGATcccagatcaaaccaggcccctgggcctatcctagaaccaacctaagctcgcgcatc	21	hsa-mir-331,ptr-mir-331,ppy-mir-331,ggo-mir-331,mml-mir-331,cja-mir-331,nle-mir-331,mmu-mir-331,bta-mir-331,cfa-mir-331,eca-mir-331,efu-mir-331,rno-mir-331,ssc-mir-331,cpo-mir-331,pal-mir-331,dno-mir-331,ocu-mir-331,chi-mir-331,cgr-mir-331,aja-mir-331,	hsa-mir-331	gagtttggttttgtttgggtttgttCTAGGTATGGTCCCAGGGATCCcagatcaaaccagGCCCCTGGGCCTATCCTAGAAccaacctaagctc	hsa-miR-331-5p	CTAGGTATGGTCCCAGGGATCC	5'	Diff	gp1a	.(((((...))))).((((...(((((((((.((((((((.((((.(((((((..(.............)..))))))).)))))))))))).)))))))))..)).))..	94	53.2	-48.6	10	0	0	9.08569	0	0	low
170	222	hsa-miR-335-5p_R-2	TCAAGAGCAATAACGAAAAAT	21	chr7	+	130496111	130496215	tgttttgagcgggggTCAAGAGCAATAACGAAAAATgtttgtcataaaccgTTTTTCATTATTGCTCCTGACCtcctctcatttgctatattcaattaagtaagt	18	hsa-mir-335,ptr-mir-335,ppy-mir-335,ggo-mir-335,mml-mir-335,cja-mir-335,bta-mir-335,eca-mir-335,cfa-mir-335,cpo-mir-335,pal-mir-335,dno-mir-335,ocu-mir-335,tch-mir-335,efu-mir-335,rno-mir-335,ssc-mir-335,chi-mir-335,	hsa-mir-335	tgttttgagcgggggTCAAGAGCAATAACGAAAAATGTttgtcataaaccgTTTTTCATTATTGCTCCTGACCtcctctcatttgctatattca	hsa-miR-335-5p	TCAAGAGCAATAACGAAAAATGT	5'	Diff	gp1a	.((..((((.((((((((.(((((((((.((((((((.((......)).)))))))).))))))))).)))))))).))))...))...................	85	36.2	-41.5	614	1136	777	557.861	960.941	1037.22	high
170	223	hsa-miR-335-3p	TTTTTCATTATTGCTCCTGACC	22	chr7	+	130496111	130496215	tgttttgagcgggggTCAAGAGCAATAACGAAAAATgtttgtcataaaccgTTTTTCATTATTGCTCCTGACCtcctctcatttgctatattcaattaagtaagt	18	hsa-mir-335,ptr-mir-335,ppy-mir-335,ggo-mir-335,mml-mir-335,cja-mir-335,bta-mir-335,eca-mir-335,cfa-mir-335,cpo-mir-335,pal-mir-335,dno-mir-335,ocu-mir-335,tch-mir-335,efu-mir-335,rno-mir-335,ssc-mir-335,chi-mir-335,	hsa-mir-335	tgttttgagcgggggTCAAGAGCAATAACGAAAAATGTttgtcataaaccgTTTTTCATTATTGCTCCTGACCtcctctcatttgctatattca	hsa-miR-335-3p	TTTTTCATTATTGCTCCTGACC	3'	Yes	gp1a	.((..((((.((((((((.(((((((((.((((((((.((......)).)))))))).))))))))).)))))))).))))...))...................	85	36.2	-41.5	32	20	13	29.0742	16.918	17.3537	middle
171	224	hsa-miR-337-3p_L-1	TCCTATATGATGCCTTTCTTC	21	chr14	+	100874493	100874603	gtagtcagtagttggggggtgggaacggcttcatacaggagttgatgcacagttatccagcTCCTATATGATGCCTTTCTTCatccccttcaaccacgcgcagcccccgga	8	hsa-mir-337,ppy-mir-337,mml-mir-337,ptr-mir-337,ggo-mir-337,cja-mir-337,dno-mir-337,ocu-mir-337,	hsa-mir-337	gtagtcagtagttggggggtggGAACGGCTTCATACAGGAGTTgatgcacagttatccagCTCCTATATGATGCCTTTCTTCatccccttcaa	hsa-miR-337-3p	CTCCTATATGATGCCTTTCTTC	3'	Diff	gp1a	...((..((.(((((((((((((((.(((.(((((.(((((((((((......))).)))))))).))))).))).))).))))))))..)))).))..))..........	98	54.1	-44	0	11	0	0	9.30489	0	low
172	225	hsa-miR-338-5p_R-1	AACAATATCCTGGTGCTGAGT	21	chr17	-	81125870	81125978	cgtcagccccagacgccgcacggctgtcctctccAACAATATCCTGGTGCTGAGTgatgactcaggcgacTCCAGCATCAGTGATTTTGTTGAagagggcagctgccag	18	hsa-mir-338,ptr-mir-338,ppy-mir-338,ggo-mir-338,mml-mir-338,cja-mir-338,mmu-mir-338,bta-mir-338,chi-mir-338,eca-mir-338,mdo-mir-338,cfa-mir-338,efu-mir-338,rno-mir-338,ssc-mir-338,cpo-mir-338,dno-mir-338,cgr-mir-338,	hsa-mir-338	tctccAACAATATCCTGGTGCTGAGTGatgactcaggcgacTCCAGCATCAGTGATTTTGTTGaaga	hsa-miR-338-5p	AACAATATCCTGGTGCTGAGTG	5'	Diff	gp1a	((((.......)))).....((((((((((((.((((((.(((((((((((((((.............))).))))))))).))).)))))).))))))))))))....	85	57.8	-51.3	5	0	0	4.54284	0	0	low
172	226	hsa-miR-338-3p_R+1	TCCAGCATCAGTGATTTTGTTGA	23	chr17	-	81125870	81125978	cgtcagccccagacgccgcacggctgtcctctccAACAATATCCTGGTGCTGAGTgatgactcaggcgacTCCAGCATCAGTGATTTTGTTGAagagggcagctgccag	18	hsa-mir-338,ptr-mir-338,ppy-mir-338,ggo-mir-338,mml-mir-338,cja-mir-338,mmu-mir-338,bta-mir-338,chi-mir-338,eca-mir-338,mdo-mir-338,cfa-mir-338,efu-mir-338,rno-mir-338,ssc-mir-338,cpo-mir-338,dno-mir-338,cgr-mir-338,	hsa-mir-338	tctccAACAATATCCTGGTGCTGAGTGatgactcaggcgacTCCAGCATCAGTGATTTTGTTGaaga	hsa-miR-338-3p	TCCAGCATCAGTGATTTTGTTG	3'	Diff	gp1a	((((.......)))).....((((((((((((.((((((.(((((((((((((((.............))).))))))))).))).)))))).))))))))))))....	85	57.8	-51.3	5	0	0	4.54284	0	0	low
173	227	hsa-miR-339-5p	TCCCTGTCCTCCAGGAGCTCACG	23	chr7	-	1022933	1023045	gtcctgtgctccgcaggggcggggcggccgctcTCCCTGTCCTCCAGGAGCTCACGtgtgcctgcctgtgAGCGCCTCGACGACAGAGCCGgcgcctgccccagtgtctgcgc	9	hsa-mir-339,ptr-mir-339,ppy-mir-339,ggo-mir-339,mml-mir-339,cja-mir-339,dma-mir-339,cpo-mir-339,dno-mir-339,	hsa-mir-339	cggggcggccgctcTCCCTGTCCTCCAGGAGCTCACGtgtgcctgcctgTGAGCGCCTCGACGACAGAGCCGgcgcctgccccagtgtctgcgc	hsa-miR-339-5p	TCCCTGTCCTCCAGGAGCTCACG	5'	Yes	gp1a	.....((((..(((.((((((((.((.(((((((....(((.((.(((.((((((..((....))..)))))).))).)).))))))).))))))))))))).)))...))))	108	73.5	-57	67	63	36	60.8741	53.2916	48.0565	middle
173	228	hsa-miR-339-3p_L-2	AGCGCCTCGACGACAGAGCCG	21	chr7	-	1022933	1023045	gtcctgtgctccgcaggggcggggcggccgctcTCCCTGTCCTCCAGGAGCTCACGtgtgcctgcctgtgAGCGCCTCGACGACAGAGCCGgcgcctgccccagtgtctgcgc	9	hsa-mir-339,ptr-mir-339,ppy-mir-339,ggo-mir-339,mml-mir-339,cja-mir-339,dma-mir-339,cpo-mir-339,dno-mir-339,	hsa-mir-339	cggggcggccgctcTCCCTGTCCTCCAGGAGCTCACGtgtgcctgcctgTGAGCGCCTCGACGACAGAGCCGgcgcctgccccagtgtctgcgc	hsa-miR-339-3p	TGAGCGCCTCGACGACAGAGCCG	3'	Diff	gp1a	.....((((..(((.((((((((.((.(((((((....(((.((.(((.((((((..((....))..)))))).))).)).))))))).))))))))))))).)))...))))	108	73.5	-57	0	6	0	0	5.07539	0	low
174	229	hsa-miR-340-5p	TTATAAAGCAATGAGACTGATT	22	chr5	-	180015292	180015402	accgtttgtacctggtgtgaTTATAAAGCAATGAGACTGATTgtcatatgtcgtttgtgggaTCCGTCTCAGTTACTTTATAGCCatacctggtatcttataccacagatc	25	hsa-mir-340,ptr-mir-340,ppy-mir-340,ggo-mir-340,ppa-mir-340,nle-mir-340,dma-mir-340,mml-mir-340,cja-mir-340,oga-mir-340,mmr-mir-340,mmu-mir-340,bta-mir-340,eca-mir-340,cfa-mir-340,rno-mir-340-2,rno-mir-340-1,ssc-mir-340-2,ssc-mir-340-1,cpo-mir-340,pal-mir-340,dno-mir-340,ocu-mir-340,chi-mir-340,cgr-mir-340,	hsa-mir-340	ttgtacctggtgtgaTTATAAAGCAATGAGACTGATTgtcatatgtcgtttgtgggaTCCGTCTCAGTTACTTTATAGCcatacctggtatctta	hsa-miR-340-5p	TTATAAAGCAATGAGACTGATT	5'	Yes	gp1a	.......(((((.((((((..(((((((...((((((.(((...((((.......))))..))).))))))....)))))))..)))))).)))))...............	89	40.5	-33.7	345	348	260	313.456	294.373	347.075	high
174	230	hsa-miR-340-3p_R+1	TCCGTCTCAGTTACTTTATAGCC	23	chr5	-	180015292	180015402	accgtttgtacctggtgtgaTTATAAAGCAATGAGACTGATTgtcatatgtcgtttgtgggaTCCGTCTCAGTTACTTTATAGCCatacctggtatcttataccacagatc	25	hsa-mir-340,ptr-mir-340,ppy-mir-340,ggo-mir-340,ppa-mir-340,nle-mir-340,dma-mir-340,mml-mir-340,cja-mir-340,oga-mir-340,mmr-mir-340,mmu-mir-340,bta-mir-340,eca-mir-340,cfa-mir-340,rno-mir-340-2,rno-mir-340-1,ssc-mir-340-2,ssc-mir-340-1,cpo-mir-340,pal-mir-340,dno-mir-340,ocu-mir-340,chi-mir-340,cgr-mir-340,	hsa-mir-340	ttgtacctggtgtgaTTATAAAGCAATGAGACTGATTgtcatatgtcgtttgtgggaTCCGTCTCAGTTACTTTATAGCcatacctggtatctta	hsa-miR-340-3p	TCCGTCTCAGTTACTTTATAGC	3'	Diff	gp1a	.......(((((.((((((..(((((((...((((((.(((...((((.......))))..))).))))))....)))))))..)))))).)))))...............	89	40.5	-33.7	0	6	0	0	5.07539	0	low
175	231	hsa-miR-342-5p	AGGGGTGCTATCTGTGATTGA	21	chr14	+	100109645	100109756	gccaacctgtgaaactgggctcaaggtgAGGGGTGCTATCTGTGATTGAgggacatggttaatggaattgTCTCACACAGAAATCGCACCCGTCaccttggcctacttatca	20	hsa-mir-342,ppy-mir-342,mml-mir-342,ptr-mir-342,ggo-mir-342,ppa-mir-342,cja-mir-342,oga-mir-342,mmr-mir-342,mmu-mir-342,rno-mir-342,eca-mir-342,cfa-mir-342,efu-mir-342,ssc-mir-342,cpo-mir-342,pal-mir-342,dno-mir-342,cgr-mir-342,tch-mir-342,	hsa-mir-342	gaaactgggctcaaggtgAGGGGTGCTATCTGTGATTGAgggacatggttaatggaattgTCTCACACAGAAATCGCACCCGTcaccttggcctactta	hsa-miR-342-5p	AGGGGTGCTATCTGTGATTGA	5'	Yes	gp1a	.........(((((.(((((.((((((((.((((((..((((((.....((((((...((....))..)))))).))))))....)))))).))))))))))))).)).)))	103	50	-48.1	6	0	0	5.45141	0	0	low
175	232	hsa-miR-342-3p_R+1	TCTCACACAGAAATCGCACCCGTC	24	chr14	+	100109645	100109756	gccaacctgtgaaactgggctcaaggtgAGGGGTGCTATCTGTGATTGAgggacatggttaatggaattgTCTCACACAGAAATCGCACCCGTCaccttggcctacttatca	20	hsa-mir-342,ppy-mir-342,mml-mir-342,ptr-mir-342,ggo-mir-342,ppa-mir-342,cja-mir-342,oga-mir-342,mmr-mir-342,mmu-mir-342,rno-mir-342,eca-mir-342,cfa-mir-342,efu-mir-342,ssc-mir-342,cpo-mir-342,pal-mir-342,dno-mir-342,cgr-mir-342,tch-mir-342,	hsa-mir-342	gaaactgggctcaaggtgAGGGGTGCTATCTGTGATTGAgggacatggttaatggaattgTCTCACACAGAAATCGCACCCGTcaccttggcctactta	hsa-miR-342-3p	TCTCACACAGAAATCGCACCCGT	3'	Diff	gp1a	.........(((((.(((((.((((((((.((((((..((((((.....((((((...((....))..)))))).))))))....)))))).))))))))))))).)).)))	103	50	-48.1	26	58	27	23.6228	49.0621	36.0424	middle
176	233	hsa-miR-345-5p	GCTGACTCCTAGTCCAGGGCTC	22	chr14	+	100307856	100307965	gagacccaaaccctaggtctGCTGACTCCTAGTCCAGGGCTCgtgatggctggtgggccctgaacgaggggtctggaggcctgggtttgaatatcgacagcctctctgac	6	hsa-mir-345,ptr-mir-345,ppy-mir-345,ggo-mir-345,cja-mir-345,nle-mir-345,	hsa-mir-345	acccaaaccctaggtctGCTGACTCCTAGTCCAGGGCTCgtgatggctggtggGCCCTGAACGAGGGGTCTGGAGgcctgggtttgaatatcgacagc	hsa-miR-345-5p	GCTGACTCCTAGTCCAGGGCTC	5'	Yes	gp1a	((....(((((((.((((((.(((((((((.((.(((((((((..........))))))))).)).))))))).)))))))))))))))....))..(((.....)))..	95	60	-49.9	7	0	0	6.35998	0	0	low
177	234	hsa-miR-361-5p	TTATCAGAATCTCCAGGGGTAC	22	X	-	85903587	85903747	gcagtggcacgcttgacagtgatttttttcctgggatttgggagcTTATCAGAATCTCCAGGGGTACtttataatttcaaaaagTCCCCCAGGTGTGATTCTGATTTgcttccttttcctcctcctgctctgagaatcaccgtttctttagaagcatcagc	22	hsa-mir-361,ppy-mir-361,mml-mir-361,ptr-mir-361,ggo-mir-361,cja-mir-361,nle-mir-361,oga-mir-361,mmr-mir-361,mmu-mir-361,bta-mir-361,eca-mir-361,cfa-mir-361,efu-mir-361,rno-mir-361,ssc-mir-361,cpo-mir-361,dno-mir-361,ocu-mir-361,chi-mir-361,cgr-mir-361,tch-mir-361,	hsa-mir-361	ggagcTTATCAGAATCTCCAGGGGTACtttataatttcaaaaagTCCCCCAGGTGTGATTCTGATTTgcttc	hsa-miR-361-5p	TTATCAGAATCTCCAGGGGTAC	5'	Yes	gp1a	((....))..((.(((..(((((((((.....((((...((((((..(((((((((.((.((((.(((((..........))))).)))).))...)))))))))..))))))...))))...........))))))))).(((((....))))).)))))	88	44.7	-53.9	74	89	80	67.2341	75.285	106.792	middle
177	235	hsa-miR-361-3p	TCCCCCAGGTGTGATTCTGATTT	23	X	-	85903587	85903747	gcagtggcacgcttgacagtgatttttttcctgggatttgggagcTTATCAGAATCTCCAGGGGTACtttataatttcaaaaagTCCCCCAGGTGTGATTCTGATTTgcttccttttcctcctcctgctctgagaatcaccgtttctttagaagcatcagc	22	hsa-mir-361,ppy-mir-361,mml-mir-361,ptr-mir-361,ggo-mir-361,cja-mir-361,nle-mir-361,oga-mir-361,mmr-mir-361,mmu-mir-361,bta-mir-361,eca-mir-361,cfa-mir-361,efu-mir-361,rno-mir-361,ssc-mir-361,cpo-mir-361,dno-mir-361,ocu-mir-361,chi-mir-361,cgr-mir-361,tch-mir-361,	hsa-mir-361	ggagcTTATCAGAATCTCCAGGGGTACtttataatttcaaaaagTCCCCCAGGTGTGATTCTGATTTgcttc	hsa-miR-361-3p	TCCCCCAGGTGTGATTCTGATTT	3'	Yes	gp1a	((....))..((.(((..(((((((((.....((((...((((((..(((((((((.((.((((.(((((..........))))).)))).))...)))))))))..))))))...))))...........))))))))).(((((....))))).)))))	88	44.7	-53.9	5	0	18	4.54284	0	24.0283	middle
178	236	hsa-miR-363-3p_R-1	AATTGCACGGTATCCATCTGT	21	X	-	134169345	134169490	gttctgatatttagtcattgtaaaatgatctgttttgctgttgtcgggtggatcacgatgcaattttgatgagtatcataggagaaaAATTGCACGGTATCCATCTGTaaaccgcaggacctttgttggcgacattcctgatcagc	17	hsa-mir-363,ppy-mir-363,mml-mir-363,ggo-mir-363,cja-mir-363,mmu-mir-363,eca-mir-363,mdo-mir-363,cfa-mir-363,rno-mir-363,ssc-mir-363-2,ssc-mir-363-1,cpo-mir-363,pal-mir-363,dno-mir-363,tch-mir-363,ocu-mir-363,	hsa-mir-363	tgttgtCGGGTGGATCACGATGCAATTTtgatgagtatcataggagaaaAATTGCACGGTATCCATCTGTAaacc	hsa-miR-363-3p	AATTGCACGGTATCCATCTGTA	3'	Diff	gp1a	...(((((.....((((((....))))))..((..(((.(((..(((((((((..((.(((((((((..................)))))))))))..)))))))))..))).)))..))......((....))......))))).	89	41.1	-41.1	27	30	14	24.5314	25.377	18.6887	middle
179	237	hsa-miR-365b-3p	TAATGCCCCTAAAAATCCTTAT	22	chr17	+	31575411	31575521	agagtgttcaaggacagcaagaaaaatgagggactttcaggggcagctgtgttttctgactcagtcaTAATGCCCCTAAAAATCCTTATtgttcttgcagtgtgcatcggg	22	hsa-mir-365b,ppy-mir-365-2,cfa-mir-365-2,ptr-mir-365-2,mml-mir-365-2,cja-mir-365-2,nle-mir-365-2,mmr-mir-365-2,oga-mir-365-2,cpo-mir-365-2,pal-mir-365b,dno-mir-365-2,mmu-mir-365-2,bta-mir-365-2,chi-mir-365,eca-mir-365-1,efu-mir-365-2,rno-mir-365,ssc-mir-365-2,ocu-mir-365-2,tch-mir-365b,cgr-mir-365-2,	hsa-mir-365b	agagtgttcaaggacagcaagaaaaatgAGGGACTTTCAGGGGCAGCTGTgttttctgactcagtcaTAATGCCCCTAAAAATCCTTATtgttcttgcagtgtgcatcggg	hsa-miR-365b-3p	TAATGCCCCTAAAAATCCTTAT	3'	Yes	gp1a	....((((....))))(((((((.((((((((..(((.(((((((((((.(((....))).)))).....))))))))))..)))))))).))))))).............	82	45	-39.3	3	9.5	8	2.72571	8.03604	10.6792	middle
180	238	hsa-miR-365b-3p	TAATGCCCCTAAAAATCCTTAT	22	chr16	+	14309270	14309380	gccagctggttcgttaccgcagggaaaatgagggacttttgggggcagatgtgtttccattccactatcaTAATGCCCCTAAAAATCCTTATtgctcttgcagtattcctc	22	hsa-mir-365a,ppy-mir-365-1,mml-mir-365-1,eca-mir-365-2,cfa-mir-365-1,ptr-mir-365-1,ggo-mir-365a,cja-mir-365-1,nle-mir-365-1,mmr-mir-365-1,oga-mir-365-1,cpo-mir-365-1,dno-mir-365-1,mmu-mir-365-1,bta-mir-365-1,mdo-mir-365,efu-mir-365-1,ssc-mir-365-1,ocu-mir-365-1,cgr-mir-365,tch-mir-365a-1,tch-mir-365a-2,	hsa-mir-365a	accgcagggaaaatgAGGGACTTTTGGGGGCAGATGTGtttccattccactatcaTAATGCCCCTAAAAATCCTTATtgctcttgca	hsa-miR-365b-3p	TAATGCCCCTAAAAATCCTTAT	3'	Yes	gp1a	(((....)))....(((.((((((..((((((((..(((((((((((..((((...............)))).))))))))))).))))))))..)))))).)))......	91	46.8	-38.4	3	9.5	8	2.72571	8.03604	10.6792	middle
181	239	hsa-miR-369-3p	AATAATACATGGTTGATCTTT	21	chr14	+	101065589	101065687	tcctggtacttgaagggagatcgaccgtgttatattcgctttattgacttcgAATAATACATGGTTGATCTTTtctcagtatcaaatctcaccttggag	18	hsa-mir-369,ppy-mir-369,mml-mir-369,ptr-mir-369,bta-mir-369,ggo-mir-369,ppa-mir-369,pal-mir-369,tch-mir-369,cja-mir-369,mmu-mir-369,eca-mir-369,rno-mir-369,cpo-mir-369,dno-mir-369,chi-mir-369,oar-mir-369,cgr-mir-369,	hsa-mir-369	ttgaagggAGATCGACCGTGTTATATTCGCtttattgacttcgAATAATACATGGTTGATCTTTtctcag	hsa-miR-369-3p	AATAATACATGGTTGATCTTT	3'	Yes	gp1a	...((((((.((.((..(((((((((((((..((((((............))))))..)))))))))))).)..))))))))))...(((......)))	81	39.4	-32.7	53	117	65	48.1541	98.9702	86.7687	middle
182	240	hsa-miR-370-3p	GCCTGCTGGGGTGGAACCTGGT	22	chr14	+	100911131	100911275	ggggcacaagacagagaagccaggtcacgtctctgcagttacacagctcacgagtGCCTGCTGGGGTGGAACCTGGTctgtctgtctgtctaacaccagagctcgggcgctgctgcagagggagccaagatttgggtgagggagg	16	hsa-mir-370,ppy-mir-370,ptr-mir-370,ggo-mir-370,ppa-mir-370,mml-mir-370,mmu-mir-370,bta-mir-370,eca-mir-370,cfa-mir-370,efu-mir-370,rno-mir-370,ssc-mir-370,cpo-mir-370,pal-mir-370,oar-mir-370,	hsa-mir-370	agacagagaagcCAGGTCACGTCTCTGCAGTTACacagctcacgagtGCCTGCTGGGGTGGAACCTGGTctgtct	hsa-miR-370-3p	GCCTGCTGGGGTGGAACCTGGT	5'	Yes	gp1a	........(((((((..((((((((..(..(((.((((..((...........))..)))).)))..)..)))))).)).))))))).(((..((((........(((.((.((....)))).)))........))))..)))..	79	60	-50.8	12	12	18	10.9028	10.1508	24.0283	middle
183	241	hsa-miR-374a-5p	TTATAATACAACCTGATAAGTG	22	X	-	74287275	74287386	ctggagcagcaccccctgggaagaaattttacatcggccaTTATAATACAACCTGATAAGTGttatagcaCTTATCAGATTGTATTGTAATTgtctgtgtatatgcctgtct	15	hsa-mir-374a,ptr-mir-374a,ppy-mir-374a,ggo-mir-374a,mml-mir-374a,cja-mir-374a,nle-mir-374a,oga-mir-374a,bta-mir-374a,eca-mir-374a,oar-mir-374a,ssc-mir-374a,cpo-mir-374,dno-mir-374a,chi-mir-374a,	hsa-mir-374a	tacatcggccaTTATAATACAACCTGATAAGTGttatagcaCTTATCAGATTGTATTGTAATTgtctgtgta	hsa-miR-374a-5p	TTATAATACAACCTGATAAGTG	5'	Yes	gp1a	.....((((((.((....)).........((((..(((.((((((((((((.(((((((((((....))))))))))).)))))))))))).)))..))))..))).)))..	72	39.3	-40.9	110	78	55	99.9426	65.9801	73.4197	middle
183	242	hsa-miR-374a-3p	CTTATCAGATTGTATTGTAATT	22	X	-	74287275	74287386	ctggagcagcaccccctgggaagaaattttacatcggccaTTATAATACAACCTGATAAGTGttatagcaCTTATCAGATTGTATTGTAATTgtctgtgtatatgcctgtct	15	hsa-mir-374a,ptr-mir-374a,ppy-mir-374a,ggo-mir-374a,mml-mir-374a,cja-mir-374a,nle-mir-374a,oga-mir-374a,bta-mir-374a,eca-mir-374a,oar-mir-374a,ssc-mir-374a,cpo-mir-374,dno-mir-374a,chi-mir-374a,	hsa-mir-374a	tacatcggccaTTATAATACAACCTGATAAGTGttatagcaCTTATCAGATTGTATTGTAATTgtctgtgta	hsa-miR-374a-3p	CTTATCAGATTGTATTGTAATT	3'	Yes	gp1a	.....((((((.((....)).........((((..(((.((((((((((((.(((((((((((....))))))))))).)))))))))))).)))..))))..))).)))..	72	39.3	-40.9	25	22	39	22.7142	18.6098	52.0612	middle
184	243	hsa-miR-374b-5p	ATATAATACAACCTGCTAAGTG	22	X	-	74218517	74218629	gaagaaatcctactcggatggATATAATACAACCTGCTAAGTGtcctagcacttagcaggttgtattatcattgtccgtgtctatggctctcgtctaccagactttaaattcc	17	hsa-mir-374b,mml-mir-374b,ptr-mir-374b,ggo-mir-374b,cja-mir-374b,mmu-mir-374b,bta-mir-374b,oar-mir-374b,eca-mir-374b,cfa-mir-374b,rno-mir-374,ssc-mir-374b,pal-mir-374b,ocu-mir-374b,chi-mir-374b,cgr-mir-374,tch-mir-374b,	hsa-mir-374b	actcggatggATATAATACAACCTGCTAAGTGtcctagcaCTTAGCAGGTTGTATTATCATTgtccgtgtct	hsa-miR-374b-5p	ATATAATACAACCTGCTAAGTG	5'	Yes	gp1a	...(((........((((..(..(((((((((((((((((((((....)))))))))))))))))))))..)..)))).((((..(((....)))....))))......))).	64	41.6	-44.7	33	44	36	29.9828	37.2196	48.0565	middle
185	244	hsa-miR-375-3p	TTTGTTCGTTCGGCTCGCGTGA	22	chr2	-	219001628	219001739	cgaccgccaggccccgggccctccgctcccgccccgcgacgagcccctcgcacaaaccggacctgagcgtTTTGTTCGTTCGGCTCGCGTGAggcaggggcggcctctcagc	16	hsa-mir-375,ppy-mir-375,mml-mir-375,mmu-mir-375,bta-mir-375,ptr-mir-375,ggo-mir-375,mdo-mir-375,cfa-mir-375,efu-mir-375,rno-mir-375,ssc-mir-375,cpo-mir-375,pal-mir-375,dno-mir-375,ocu-mir-375,	hsa-mir-375	ccccGCGACGAGCCCCTCGCACAAACCggacctgagcgtTTTGTTCGTTCGGCTCGCGTGAggc	hsa-miR-375-3p	TTTGTTCGTTCGGCTCGCGTGA	3'	Yes	gp1a	.....((..((((...))))..(((((((.(((.((((.((((((...((.(((((.((........)).))))).))...)))))))))).))).))))))).......))	81	74.1	-50.6	0	13	5	0	10.9967	6.67452	middle
186	245	hsa-miR-376c-3p	AACATAGAGGAAATTCCACGT	21	chr14	+	101039662	101039777	tccaggactcaatccttctttggtatttaaaaggtggatattccttctatgtttatgttatttatggttaAACATAGAGGAAATTCCACGTtttcagtatcaaatgctgcttggaa	14	hsa-mir-376c,ppy-mir-376c,mml-mir-376c,ptr-mir-376c,ggo-mir-376c,ppa-mir-376c,bta-mir-376c,eca-mir-376c,cfa-mir-376c,ssc-mir-376c,ssc-mir-376b,chi-mir-376c,tch-mir-376c,oar-mir-376c,	hsa-mir-376c	aaaaGGTGGATATTCCTTCTATGTTtatgttatttatggttaAACATAGAGGAAATTCCACGTttt	hsa-miR-376c-3p	AACATAGAGGAAATTCCACGT	3'	Yes	gp1a	((((((...((.......(((((((((.((((.(((((..((((.((((((((((.............))))))))))))))..))))).)))).)))))))))))...)))))).	115	33.6	-39.3	12	13	5	10.9028	10.9967	6.67452	middle
187	246	hsa-miR-376a-3p	ATCATAGAGGAAAATCCACGT	21	chr14	+	101040755	101040869	tcctggatggaatccttctttggtatttaaaaggtagattctccttctatgagtacattatttatgattaATCATAGAGGAAAATCCACGTtttcagtatcaaatgctgctttga	16	hsa-mir-376a-1,ppy-mir-376a-1,mml-mir-376a-1,ptr-mir-376a-1,ggo-mir-376a,cja-mir-376a-1,bta-mir-376a,eca-mir-376a,cfa-mir-376a-1,cpo-mir-376a,dno-mir-376a,ocu-mir-376a,tch-mir-376a-2,ssc-mir-376a,chi-mir-376a,oar-mir-376a,	hsa-mir-376a-1	taaaagGTAGATTCTCCTTCTATGAGTAcattatttatgattaATCATAGAGGAAAATCCACGTtttc	hsa-miR-376a-3p	ATCATAGAGGAAAATCCACGT	3'	Yes	gp1a	(((.....))).......(((((((((.((((.((.((((.((((.((((((...(((.....))).....)))))))))).)))).)).)))).)))))))))...........	86	33	-29.5	0	3	0	0	2.5377	0	low
188	247	hsa-miR-376b-3p_R+1	ATCATAGAGGAAAATCCATGTTC	23	chr14	+	101040426	101040543	ttccagagcccagtccttctttggtatttaaaacgtggatattccttctatgtttacgtgattcctggttaATCATAGAGGAAAATCCATGTTTtcagtatcaaatgctgctttggaa	11	hsa-mir-376b,mml-mir-376b,ptr-mir-376b,ppy-mir-376b,ggo-mir-376b,cja-mir-376b,bta-mir-376b,eca-mir-376b,cfa-mir-376b,chi-mir-376b,oar-mir-376b,	hsa-mir-376b	cagtccttctttggtatttaaaaCGTGGATATTCCTTCTATGTTTacgtgattcctggttaATCATAGAGGAAAATCCATGTTttcagtatcaaatgctg	hsa-miR-376b-3p	ATCATAGAGGAAAATCCATGTT	3'	Diff	gp1a	(((((((((..(((.....(((((((((.(((((((((((.(((((.(((((......((((.....))))..)))))))))).))))))))))).))))))))).))))))))))))	118	37.3	-44.2	0	0	5	0	0	6.67452	low
189	248	hsa-miR-376a-3p	ATCATAGAGGAAAATCCACGT	21	chr14	+	101040066	101040151	tttggtatttaaaaggtagattttccttctatggttacgtgtttgatggttaATCATAGAGGAAAATCCACGTtttcagtatcaaa	7	hsa-mir-376a-2,ppy-mir-376a-2,mml-mir-376a-2,ptr-mir-376a-2,cja-mir-376a-2,cfa-mir-376a-2,tch-mir-376a-1,	hsa-mir-376a-2	ggtatttaaaaGGTAGATTTTCCTTCTATGGTtacgtgtttgatggttaATCATAGAGGAAAATCCACGTtttcagtatc	hsa-miR-376a-3p	ATCATAGAGGAAAATCCACGT	3'	Yes	gp1a	(((((((((.((((.((.((((((((.(((((((((((((.....)))..)))))))))))))))))).)).)))).)))))))))	86	31.4	-31.6	0	3	0	0	2.5377	0	low
190	249	hsa-miR-377-3p_L+1R+1	AATCACACAAAGGCAACTTTTGTT	24	chr14	+	101062024	101062139	ttcttgcccgtgctgatgtttgacccttgagcagaggttgcccttggtgaattcgctttatttatgttgAATCACACAAAGGCAACTTTTGTTtgagtatcaaatcctgcttggga	16	hsa-mir-377,ppy-mir-377,mml-mir-377,bta-mir-377,eca-mir-377,cfa-mir-377,ptr-mir-377,ggo-mir-377,cja-mir-377,mmu-mir-377,rno-mir-377,cpo-mir-377,pal-mir-377,ocu-mir-377,chi-mir-377,cgr-mir-377,	hsa-mir-377	ttgagcAGAGGTTGCCCTTGGTGAATTCgctttatttatgttgaATCACACAAAGGCAACTTTTGTttg	hsa-miR-377-3p	ATCACACAAAGGCAACTTTTGT	3'	Diff	gp1a	......(((..((....((((((..((..(((((((((((((.(((((((.(((((.........).)))))))).))).)))))))))))))..))..))))))...))..))).	109	43.1	-45.7	5	5	5	4.54284	4.2295	6.67452	low
191	250	hsa-miR-378a-5p	CTCCTGACTCCAGGTCCTGTGT	22	chr5	+	149732797	149732908	atgcagccagagggtgacagagccacccagggCTCCTGACTCCAGGTCCTGTGTgttacctagaaatagcACTGGACTTGGAGTCAGAAGGCctgagtggagtcaccttccc	23	hsa-mir-378a,ptr-mir-378a,ppy-mir-378a,ggo-mir-378a,ppa-mir-378a,nle-mir-378a,mml-mir-378a,mmu-mir-378a,bta-mir-378-1,eca-mir-378,cja-mir-378,cfa-mir-378,cpo-mir-378,ocu-mir-378,tch-mir-378a,oga-mir-378,dno-mir-378,efu-mir-378,rno-mir-378a,ssc-mir-378-1,pal-mir-378,chi-mir-378,cgr-mir-378,	hsa-mir-378a	agggCTCCTGACTCCAGGTCCTGTGTgttacctagaaatagcACTGGACTTGGAGTCAGAAGGCct	hsa-miR-378a-5p	CTCCTGACTCCAGGTCCTGTGT	5'	Yes	gp1a	.........(((((((((....((((.((((.((.((((((((((((((...((((((........)))))).)))))))))))))).)).)))).)))).)))))))))..	101	57.1	-62.7	10	8	0	9.08569	6.76719	0	low
191	251	hsa-miR-378a-3p	ACTGGACTTGGAGTCAGAAGGC	22	chr5	+	149732797	149732908	atgcagccagagggtgacagagccacccagggCTCCTGACTCCAGGTCCTGTGTgttacctagaaatagcACTGGACTTGGAGTCAGAAGGCctgagtggagtcaccttccc	23	hsa-mir-378a,ptr-mir-378a,ppy-mir-378a,ggo-mir-378a,ppa-mir-378a,nle-mir-378a,mml-mir-378a,mmu-mir-378a,bta-mir-378-1,eca-mir-378,cja-mir-378,cfa-mir-378,cpo-mir-378,ocu-mir-378,tch-mir-378a,oga-mir-378,dno-mir-378,efu-mir-378,rno-mir-378a,ssc-mir-378-1,pal-mir-378,chi-mir-378,cgr-mir-378,	hsa-mir-378a	agggCTCCTGACTCCAGGTCCTGTGTgttacctagaaatagcACTGGACTTGGAGTCAGAAGGCct	hsa-miR-378a-3p	ACTGGACTTGGAGTCAGAAGGC	3'	Yes	gp1a	.........(((((((((....((((.((((.((.((((((((((((((...((((((........)))))).)))))))))))))).)).)))).)))).)))))))))..	101	57.1	-62.7	350.5	455	208	318.453	384.884	277.66	high
192	252	hsa-miR-378d	ACTGGACTTGGAGTCAGAAA	20	chr8	-	93916022	93916119	gaatggttacaaggagagaacACTGGACTTGGAGTCAGAAAactttcatccaagtcattccctgctctaagtcccatttctgttccatgagattgttt	1	hsa-mir-378d-2,	hsa-mir-378d-2	gaatggttacaaggagagaacACTGGACTTGGAGTCAGAAAactttcatccaagtcattccctgctctaagtcccatttctgttccatgagattgttt	hsa-miR-378d	ACTGGACTTGGAGTCAGAAA	5'	Yes	gp1a	(((..((..((.((((((((....(((((((((((..(((.((((......))))..)))...)))))))))))...)))).)))).))..))..)))	98	41.8	-29.7	0	6	0	0	5.07539	0	low
193	253	hsa-miR-378c_R-5	ACTGGACTTGGAGTCAGAAG	20	chr10	-	130962588	130962668	ggaggccatcACTGGACTTGGAGTCAGAAGagtggagtcgggtcagacttcaactctgactttgaaggtggtgagtgcctc	1	hsa-mir-378c,	hsa-mir-378c	ggaggccatcACTGGACTTGGAGTCAGAAGAGTGGagtcgggtcagacttcaactctgactttgaaggtggtgagtgcctc	hsa-miR-378c	ACTGGACTTGGAGTCAGAAGAGTGG	5'	Diff	gp1a	.((((((((((((....(..((((((((....(((((((......)))))))..))))))))..).)))))))...)))))	80	54.3	-37.3	15	9	6	13.6285	7.61309	8.00942	middle
194	254	hsa-miR-378i_R+1_1ss9AT	ACTGGACTTGGAGTCAGAAGGT	22	chr22	-	41923222	41923297	gggagcACTGGACTAGGAGTCAGAAGGTggagttctgggtgctgttttcccactcttgggccctgggcatgttctg	1	hsa-mir-378i,	hsa-mir-378i	gggagcACTGGACTAGGAGTCAGAAGGtggagttctgggtgctgttttcccactcttgggccctgggcatgttctg	hsa-miR-378i	ACTGGACTAGGAGTCAGAAGG	5'	Diff	gp1a	.((((((.((..(((((.(((.......(((((...(((........))).)))))..)))))))).)))))))).	74	57.9	-24.7	5.5	3	4	4.99713	2.5377	5.33961	low
195	255	hsa-miR-379-5p	TGGTAGACTATGGAACGTAGG	21	chr14	+	101022029	101022159	cctggttctggggtcagcaccattccgtggttcctgaagagaTGGTAGACTATGGAACGTAGGcgttatgatttctgaccTATGTAACATGGTCCACTAACtctcagtatccaatccatcctcggagggct	20	hsa-mir-379,ptr-mir-379,ppy-mir-379,mml-mir-379,ggo-mir-379,ppa-mir-379,ocu-mir-379,cja-mir-379,mmu-mir-379,bta-mir-379,eca-mir-379,cfa-mir-379,pal-mir-379,dno-mir-379,efu-mir-379,rno-mir-379,cpo-mir-379,chi-mir-379,cgr-mir-379,oar-mir-379,	hsa-mir-379	agagaTGGTAGACTATGGAACGTAGGcgttatgatttctgaccTATGTAACATGGTCCACTAACTct	hsa-miR-379-5p	TGGTAGACTATGGAACGTAGG	5'	Yes	gp1a	(((...(((((((.....(((((...)))))..(((.((((.((((.(((((((..(((((((((..........)).)))))))..))))))).)))).)))))))............))))))))))..	74	49.6	-44.2	23	11	28	20.8971	9.30489	37.3773	middle
195	256	hsa-miR-379-3p_R-1	TATGTAACATGGTCCACTAAC	21	chr14	+	101022029	101022159	cctggttctggggtcagcaccattccgtggttcctgaagagaTGGTAGACTATGGAACGTAGGcgttatgatttctgaccTATGTAACATGGTCCACTAACtctcagtatccaatccatcctcggagggct	20	hsa-mir-379,ptr-mir-379,ppy-mir-379,mml-mir-379,ggo-mir-379,ppa-mir-379,ocu-mir-379,cja-mir-379,mmu-mir-379,bta-mir-379,eca-mir-379,cfa-mir-379,pal-mir-379,dno-mir-379,efu-mir-379,rno-mir-379,cpo-mir-379,chi-mir-379,cgr-mir-379,oar-mir-379,	hsa-mir-379	agagaTGGTAGACTATGGAACGTAGGcgttatgatttctgaccTATGTAACATGGTCCACTAACTct	hsa-miR-379-3p	TATGTAACATGGTCCACTAACT	3'	Diff	gp1a	(((...(((((((.....(((((...)))))..(((.((((.((((.(((((((..(((((((((..........)).)))))))..))))))).)))).)))))))............))))))))))..	74	49.6	-44.2	0	7	0	0	5.92129	0	low
196	257	hsa-miR-380-3p_R-1	TATGTAATATGGTCCACATCT	21	chr14	+	101025000	101025110	tctccaaggtacctgaaaagatggttgaccatagaacatgcgctatctctgtgtcgTATGTAATATGGTCCACATCTtctcaatatcaaattcagtcatagagggcttccc	3	hsa-mir-380,ptr-mir-380,ggo-mir-380,	hsa-mir-380	aagaTGGTTGACCATAGAACATGCGCtatctctgtgtcgTATGTAATATGGTCCACATCTT	hsa-miR-380-3p	TATGTAATATGGTCCACATCTT	3'	Diff	gp1a	.......((((..(((.((((((...(((((((..((((((((.........).)))))))..)))))))..)))))).))).))))......((((......))))....	80	42.3	-32.5	0	0	7	0	0	9.34433	low
197	258	hsa-miR-381-3p	TATACAAGGGCAAGCTCTCTGT	22	chr14	+	101045897	101046005	acctgcccagtgctattgtttggtacttaaagcgaggttgccctttgtatattcggtttattgacatggaaTATACAAGGGCAAGCTCTCTGTgagtatcaaaccttgt	19	hsa-mir-381,ppy-mir-381,mml-mir-381,mmu-mir-381,ptr-mir-381,ggo-mir-381,ppa-mir-381,nle-mir-381,cja-mir-381,mmr-mir-381,dma-mir-381,bta-mir-381,eca-mir-381,cfa-mir-381,efu-mir-381,cpo-mir-381,chi-mir-381,cgr-mir-381,tch-mir-381,	hsa-mir-381	tacttaaAGCGAGGTTGCCCTTTGTATATtcggtttattgacatggaaTATACAAGGGCAAGCTCTCTGTgagta	hsa-miR-381-3p	TATACAAGGGCAAGCTCTCTGT	3'	Yes	gp1a	.................((((((((((((.((.(((.((((((((.((((((((.(((....)))...)))))))))))))))).))).)).)))))))))))).....	87	42.2	-44.2	42	34	33	38.1599	28.7606	44.0518	middle
198	259	hsa-miR-382-5p	GAAGTTGTTCGTGGTGGATTCG	22	chr14	+	101054280	101054399	tctgtcttgtctctgcttttctgtggtacttgaagaGAAGTTGTTCGTGGTGGATTCGctttacttatgacgAATCATTCACGGACAACACTTTtttcagtaccaaatgctacctctaag	21	hsa-mir-382,mml-mir-382,bta-mir-382,eca-mir-382,ptr-mir-382,ppy-mir-382,ggo-mir-382,ppa-mir-382,cja-mir-382,mmu-mir-382,cfa-mir-382,efu-mir-382,ssc-mir-382,rno-mir-382,cpo-mir-382,dno-mir-382,ocu-mir-382,pal-mir-382,chi-mir-382,oar-mir-382,cgr-mir-382,	hsa-mir-382	tacttgaagaGAAGTTGTTCGTGGTGGATTCGctttacttatgacgAATCATTCACGGACAACACTTttttcagta	hsa-miR-382-5p	GAAGTTGTTCGTGGTGGATTCG	5'	Yes	gp1a	..............((.......((((((.((((((((.(((((((((((..((((((.((.......))))))))..)))))))))))..))))))))))))))...))..........	96	40.8	-37.2	46	53	37	41.7942	44.8326	49.3914	middle
198	260	hsa-miR-382-3p_R+1	AATCATTCACGGACAACACTTT	22	chr14	+	101054280	101054399	tctgtcttgtctctgcttttctgtggtacttgaagaGAAGTTGTTCGTGGTGGATTCGctttacttatgacgAATCATTCACGGACAACACTTTtttcagtaccaaatgctacctctaag	21	hsa-mir-382,mml-mir-382,bta-mir-382,eca-mir-382,ptr-mir-382,ppy-mir-382,ggo-mir-382,ppa-mir-382,cja-mir-382,mmu-mir-382,cfa-mir-382,efu-mir-382,ssc-mir-382,rno-mir-382,cpo-mir-382,dno-mir-382,ocu-mir-382,pal-mir-382,chi-mir-382,oar-mir-382,cgr-mir-382,	hsa-mir-382	tacttgaagaGAAGTTGTTCGTGGTGGATTCGctttacttatgacgAATCATTCACGGACAACACTTttttcagta	hsa-miR-382-3p	AATCATTCACGGACAACACTT	3'	Diff	gp1a	..............((.......((((((.((((((((.(((((((((((..((((((.((.......))))))))..)))))))))))..))))))))))))))...))..........	96	40.8	-37.2	17	10	0	15.4457	8.45899	0	middle
199	261	hsa-miR-409-5p	AGGTTACCCGAGCAACTTTGCAT	23	chr14	+	101065292	101065405	cctctccatggtactcggggagAGGTTACCCGAGCAACTTTGCATctggacgacGAATGTTGCTCGGTGAACCCCTtttcggtatcaaattccaccagggaggccgtcttggag	24	hsa-mir-409,ppy-mir-409,mml-mir-409,eca-mir-409,ptr-mir-409,ggo-mir-409,ppa-mir-409,nle-mir-409,oga-mir-409,mmr-mir-409,dma-mir-409,pal-mir-409,ocu-mir-409,tch-mir-409,cja-mir-409,mmu-mir-409,bta-mir-409a,cfa-mir-409,efu-mir-409,rno-mir-409a,dno-mir-409,chi-mir-409,cgr-mir-409,oar-mir-409,	hsa-mir-409	tggtactcggggagAGGTTACCCGAGCAACTTTGCATctggacgacGAATGTTGCTCGGTGAACCCCTtttcggtatca	hsa-miR-409-5p	AGGTTACCCGAGCAACTTTGCAT	5'	Yes	gp1a	........((((((.((..(((.((((..(((((((((((((..((.....)))))).)))))))))..)))).)))..)))))))).......((((((......))))))..	79	55.3	-46.2	11	31	7	9.99426	26.2229	9.34433	middle
199	262	hsa-miR-409-3p	GAATGTTGCTCGGTGAACCCCT	22	chr14	+	101065292	101065405	cctctccatggtactcggggagAGGTTACCCGAGCAACTTTGCATctggacgacGAATGTTGCTCGGTGAACCCCTtttcggtatcaaattccaccagggaggccgtcttggag	24	hsa-mir-409,ppy-mir-409,mml-mir-409,eca-mir-409,ptr-mir-409,ggo-mir-409,ppa-mir-409,nle-mir-409,oga-mir-409,mmr-mir-409,dma-mir-409,pal-mir-409,ocu-mir-409,tch-mir-409,cja-mir-409,mmu-mir-409,bta-mir-409a,cfa-mir-409,efu-mir-409,rno-mir-409a,dno-mir-409,chi-mir-409,cgr-mir-409,oar-mir-409,	hsa-mir-409	tggtactcggggagAGGTTACCCGAGCAACTTTGCATctggacgacGAATGTTGCTCGGTGAACCCCTtttcggtatca	hsa-miR-409-3p	GAATGTTGCTCGGTGAACCCCT	3'	Yes	gp1a	........((((((.((..(((.((((..(((((((((((((..((.....)))))).)))))))))..)))).)))..)))))))).......((((((......))))))..	79	55.3	-46.2	76	43	41	69.0512	36.3737	54.731	middle
200	263	hsa-miR-410-3p	AATATAACACAGATGGCCTGT	21	chr14	+	101065891	101065998	tcttgagccgatggcactctgggtacctgagaagaggttgtctgtgatgagttcgcttttattaatgacgAATATAACACAGATGGCCTGTtttcagtaccgctaccg	19	hsa-mir-410,ppy-mir-410,ptr-mir-410,ggo-mir-410,ppa-mir-410,nle-mir-410,mml-mir-410,cja-mir-410,oga-mir-410,mmr-mir-410,cpo-mir-410,pal-mir-410,mmu-mir-410,bta-mir-410,eca-mir-410,cfa-mir-410,rno-mir-410,dno-mir-410,cgr-mir-410,	hsa-mir-410	ggtacctgagaagAGGTTGTCTGTGATGAGTTCGcttttattaatgacgAATATAACACAGATGGCCTGTtttcagtacc	hsa-miR-410-3p	AATATAACACAGATGGCCTGT	3'	Yes	gp1a	......(((...)))......((((.(((((((.((((..((((((.((..((((.((........))))))..)).))))))..)))).))))))))))).......	80	46.3	-39.9	42	45	12	38.1599	38.0655	16.0188	middle
201	264	hsa-miR-411-5p	TAGTAGACCGTATAGCGTACG	21	chr14	+	101023300	101023429	agcctttgtcctcggcatctctgtgtggtacttggagagaTAGTAGACCGTATAGCGTACGctttatctgtgacgTATGTAACACGGTCCACTAACcctcagtatcaaatccatccccgaggctcctgga	22	hsa-mir-411,ppy-mir-411,ptr-mir-411,ggo-mir-411,ppa-mir-411a,mml-mir-411,mmu-mir-411,bta-mir-411a,eca-mir-411,cja-mir-411,oga-mir-411a,mmr-mir-411a,cpo-mir-411,pal-mir-411,dno-mir-411,ocu-mir-411,cfa-mir-411,rno-mir-411,ssc-mir-411,chi-mir-411a,tch-mir-411,oar-mir-411a,	hsa-mir-411	tggtacttggagagaTAGTAGACCGTATAGCGTACGctttatctgtgacgTATGTAACACGGTCCACTAACCctcagtatcaaatccatccccgag	hsa-miR-411-5p	TAGTAGACCGTATAGCGTACG	5'	Yes	gp1a	..((...(.((((((..........(((((((..(((...((((.((((((...(((((((.((.......)))))))))...)))))).))))...)))))))))).........)))))))....)).	82	50	-41.6	0	13	6	0	10.9967	8.00942	middle
201	265	hsa-miR-411-3p_R-1	TATGTAACACGGTCCACTAAC	21	chr14	+	101023300	101023429	agcctttgtcctcggcatctctgtgtggtacttggagagaTAGTAGACCGTATAGCGTACGctttatctgtgacgTATGTAACACGGTCCACTAACcctcagtatcaaatccatccccgaggctcctgga	22	hsa-mir-411,ppy-mir-411,ptr-mir-411,ggo-mir-411,ppa-mir-411a,mml-mir-411,mmu-mir-411,bta-mir-411a,eca-mir-411,cja-mir-411,oga-mir-411a,mmr-mir-411a,cpo-mir-411,pal-mir-411,dno-mir-411,ocu-mir-411,cfa-mir-411,rno-mir-411,ssc-mir-411,chi-mir-411a,tch-mir-411,oar-mir-411a,	hsa-mir-411	tggtacttggagagaTAGTAGACCGTATAGCGTACGctttatctgtgacgTATGTAACACGGTCCACTAACCctcagtatcaaatccatccccgag	hsa-miR-411-3p	TATGTAACACGGTCCACTAACC	3'	Diff	gp1a	..((...(.((((((..........(((((((..(((...((((.((((((...(((((((.((.......)))))))))...)))))).))))...)))))))))).........)))))))....)).	82	50	-41.6	6	5	0	5.45141	4.2295	0	low
202	266	hsa-miR-421_L-1	TCAACAGACATTAATTGGGCGC	22	X	-	74218368	74218484	gtattcacagtgcctaatccggtgcacattgtaggcctcattaaatgtttgttgaatgaaaaaatgaatcaTCAACAGACATTAATTGGGCGCctgctctgtgatctccatgggctc	14	hsa-mir-421,bta-mir-421,ptr-mir-421,ppy-mir-421,ggo-mir-421,mml-mir-421,eca-mir-421,cja-mir-421,nle-mir-421,ocu-mir-421,mmu-mir-421,rno-mir-421,ssc-mir-421,chi-mir-421,	hsa-mir-421	gcacattgtaggcctcattaaatgtttgttgaatgaaaaaatgaatcATCAACAGACATTAATTGGGCGCctgctctgtgatctc	hsa-miR-421	ATCAACAGACATTAATTGGGCGC	3'	Diff	gp1a	...........(((((....(((.((((..((((((((((...((((((((((((.(((.........)))))))))))))))...)))).))))))..)))))))....)))))..	104	42.7	-43.4	7	6	11	6.35998	5.07539	14.6839	middle
203	267	hsa-miR-423-5p	TGAGGGGCAGAGAGCGAGACTTT	23	chr17	+	30117025	30117215	ccgtacattttcccggatggaagcccgaagtttgagggagaaacttgtgaggaaataaaggaagttaggcTGAGGGGCAGAGAGCGAGACTTTtctattttccaaaAGCTCGGTCTGAGGCCCCTCAGTcttgcttcctaacccgcgcttgagtttctccccgcttggatgctctcaggggcagtgtgaag	25	hsa-mir-423,ptr-mir-423,ppy-mir-423,ggo-mir-423,ppa-mir-423,nle-mir-423,oga-mir-423,dma-mir-423,sbo-mir-423,cfa-mir-423a,cpo-mir-423,pal-mir-423,dno-mir-423,ocu-mir-423,tch-mir-423,mml-mir-423,bta-mir-423,cja-mir-423,mmu-mir-423,eca-mir-423,efu-mir-423,rno-mir-423,ssc-mir-423,chi-mir-423,cgr-mir-423,	hsa-mir-423	ataaaggaagttaggcTGAGGGGCAGAGAGCGAGACTTTtctattttccaaaAGCTCGGTCTGAGGCCCCTCAGTcttgcttcctaacccgcgc	hsa-miR-423-5p	TGAGGGGCAGAGAGCGAGACTTT	5'	Yes	gp1a	...((((((..(((...((..(((((.((((..(.((((((((((((((.((......((((((..((((((((((((..(((.((((.(((((.........))))))))).)))...))))))))))))..))))))...)).)))..))))))))))))))))))..)))..)))))..))))))...	185	52.4	-87.2	7029	7497	9284	6386.33	6341.71	12393.2	high
203	268	hsa-miR-423-3p	AGCTCGGTCTGAGGCCCCTCAGT	23	chr17	+	30117025	30117215	ccgtacattttcccggatggaagcccgaagtttgagggagaaacttgtgaggaaataaaggaagttaggcTGAGGGGCAGAGAGCGAGACTTTtctattttccaaaAGCTCGGTCTGAGGCCCCTCAGTcttgcttcctaacccgcgcttgagtttctccccgcttggatgctctcaggggcagtgtgaag	25	hsa-mir-423,ptr-mir-423,ppy-mir-423,ggo-mir-423,ppa-mir-423,nle-mir-423,oga-mir-423,dma-mir-423,sbo-mir-423,cfa-mir-423a,cpo-mir-423,pal-mir-423,dno-mir-423,ocu-mir-423,tch-mir-423,mml-mir-423,bta-mir-423,cja-mir-423,mmu-mir-423,eca-mir-423,efu-mir-423,rno-mir-423,ssc-mir-423,chi-mir-423,cgr-mir-423,	hsa-mir-423	ataaaggaagttaggcTGAGGGGCAGAGAGCGAGACTTTtctattttccaaaAGCTCGGTCTGAGGCCCCTCAGTcttgcttcctaacccgcgc	hsa-miR-423-3p	AGCTCGGTCTGAGGCCCCTCAGT	3'	Yes	gp1a	...((((((..(((...((..(((((.((((..(.((((((((((((((.((......((((((..((((((((((((..(((.((((.(((((.........))))))))).)))...))))))))))))..))))))...)).)))..))))))))))))))))))..)))..)))))..))))))...	185	52.4	-87.2	528	472	583	479.724	399.264	778.249	high
204	269	hsa-miR-424-5p_R-1	CAGCAGCAATTCATGTTTTGA	21	X	-	134546606	134546729	atcccccttcattgactccgaggggataCAGCAGCAATTCATGTTTTGAagtgttctaaatggttCAAAACGTGAGGCGCTGCTATaccccctcgtggggaaggtagaaggtggggtctgccgg	20	hsa-mir-424,ppy-mir-424,mml-mir-424,ptr-mir-424,ggo-mir-424,ppa-mir-424,nle-mir-424,cja-mir-424,mmr-mir-424,dno-mir-424,sbo-mir-424,bta-mir-424,eca-mir-424,cfa-mir-424,efu-mir-424,ssc-mir-424,pal-mir-424,ocu-mir-424,chi-mir-424,tch-mir-424,	hsa-mir-424	cgaggggataCAGCAGCAATTCATGTTTTGAAgtgttctaaatggttCAAAACGTGAGGCGCTGCTATaccccctcgtggggaaggtagaaggtgggg	hsa-miR-424-5p	CAGCAGCAATTCATGTTTTGAA	5'	Diff	gp1a	((((((((((.((..((((((((((.((.((((((..(((((((((((((..(((...)))..)))))))))))))..)))))).)).))))))).)))..))...))))).))))).......	117	52.4	-58.6	49	57	21	44.5199	48.2162	28.033	middle
204	270	hsa-miR-424-3p	CAAAACGTGAGGCGCTGCTAT	21	X	-	134546606	134546729	atcccccttcattgactccgaggggataCAGCAGCAATTCATGTTTTGAagtgttctaaatggttCAAAACGTGAGGCGCTGCTATaccccctcgtggggaaggtagaaggtggggtctgccgg	20	hsa-mir-424,ppy-mir-424,mml-mir-424,ptr-mir-424,ggo-mir-424,ppa-mir-424,nle-mir-424,cja-mir-424,mmr-mir-424,dno-mir-424,sbo-mir-424,bta-mir-424,eca-mir-424,cfa-mir-424,efu-mir-424,ssc-mir-424,pal-mir-424,ocu-mir-424,chi-mir-424,tch-mir-424,	hsa-mir-424	cgaggggataCAGCAGCAATTCATGTTTTGAAgtgttctaaatggttCAAAACGTGAGGCGCTGCTATaccccctcgtggggaaggtagaaggtgggg	hsa-miR-424-3p	CAAAACGTGAGGCGCTGCTAT	3'	Yes	gp1a	((((((((((.((..((((((((((.((.((((((..(((((((((((((..(((...)))..)))))))))))))..)))))).)).))))))).)))..))...))))).))))).......	117	52.4	-58.6	23	21	18	20.8971	17.7639	24.0283	middle
205	271	hsa-miR-425-5p	AATGACACGATCACTCCCGTTGA	23	chr3	-	49020148	49020234	gaaagcgctttggAATGACACGATCACTCCCGTTGAgtgggcacccgagaagcCATCGGGAATGTCGTGTCCGCCcagtgctctttc	18	hsa-mir-425,ppy-mir-425,ptr-mir-425,mml-mir-425,mmr-mir-425,mmu-mir-425,bta-mir-425,mdo-mir-425,cfa-mir-425,cpo-mir-425,rno-mir-425,ssc-mir-425,pal-mir-425,dno-mir-425,ocu-mir-425,chi-mir-425,cgr-mir-425,tch-mir-425,	hsa-mir-425	gaaagcgctttggAATGACACGATCACTCCCGTTGAgtgggcacccgagaagccATCGGGAATGTCGTGTCCGCCCagtgctctttc	hsa-miR-425-5p	AATGACACGATCACTCCCGTTGA	5'	Yes	gp1a	(((((.((..(((...(((((((((((((.....)))))....(((((.......)))))...))))))))...)))..)).)))))	87	57.5	-34.7	92	100	52	83.5883	84.5899	69.415	middle
205	272	hsa-miR-425-3p_L+1R-1	CATCGGGAATGTCGTGTCCGCC	22	chr3	-	49020148	49020234	gaaagcgctttggAATGACACGATCACTCCCGTTGAgtgggcacccgagaagcCATCGGGAATGTCGTGTCCGCCcagtgctctttc	18	hsa-mir-425,ppy-mir-425,ptr-mir-425,mml-mir-425,mmr-mir-425,mmu-mir-425,bta-mir-425,mdo-mir-425,cfa-mir-425,cpo-mir-425,rno-mir-425,ssc-mir-425,pal-mir-425,dno-mir-425,ocu-mir-425,chi-mir-425,cgr-mir-425,tch-mir-425,	hsa-mir-425	gaaagcgctttggAATGACACGATCACTCCCGTTGAgtgggcacccgagaagccATCGGGAATGTCGTGTCCGCCCagtgctctttc	hsa-miR-425-3p	ATCGGGAATGTCGTGTCCGCCC	3'	Diff	gp1a	(((((.((..(((...(((((((((((((.....)))))....(((((.......)))))...))))))))...)))..)).)))))	87	57.5	-34.7	14	0	5	12.72	0	6.67452	middle
206	273	hsa-miR-432-5p	TCTTGGAGTAGGTCATTGGGTGG	23	chr14	+	100884476	100884585	cgttgcatgactcctccaggTCTTGGAGTAGGTCATTGGGTGGatcctctatttccttacgtgggccactggatggctcctccatgtcttggagtagatcagtgggcagc	19	hsa-mir-432,ppy-mir-432,ptr-mir-432,ggo-mir-432,ppa-mir-432,mml-mir-432,cja-mir-432,dma-mir-432,bta-mir-432,chi-mir-432,oar-mir-432,eca-mir-432,cfa-mir-432,ssc-mir-432,cpo-mir-432,pal-mir-432,dno-mir-432,ocu-mir-432,tch-mir-432,	hsa-mir-432	tgactcctccaggTCTTGGAGTAGGTCATTGGGTGGatcctctatttccttacgtgggccaCTGGATGGCTCCTCCATGTCTtggagtagatca	hsa-miR-432-5p	TCTTGGAGTAGGTCATTGGGTGG	5'	Yes	gp1a	.(((((.(((((.(((((((...(((((..((((((..(((((.(((...............))))))))..)))))).)))))...))))))).)).)))....)))))	109	54.5	-44	20	22	25	18.1714	18.6098	33.3726	middle
207	274	hsa-miR-433-3p	ATCATGATGGGCTCCTCGGTGT	22	chr14	+	100881877	100882006	acccaatgcccggggagaagtacggtgagcctgtcattattcagagaggctagatcctctgtgttgagaaggATCATGATGGGCTCCTCGGTGTtctccaggtagcggcaccacaccatgaaggcagccc	16	hsa-mir-433,ppy-mir-433,rno-mir-433,ptr-mir-433,ggo-mir-433,mml-mir-433,mmu-mir-433,bta-mir-433,eca-mir-433,cfa-mir-433,cpo-mir-433,pal-mir-433,dno-mir-433,ocu-mir-433,chi-mir-433,oar-mir-433,	hsa-mir-433	ccggggagaagTACGGTGAGCCTGTCATTATTCagagaggctagatcctctgtgttgagaaggATCATGATGGGCTCCTCGGTGTtctccagg	hsa-miR-433-3p	ATCATGATGGGCTCCTCGGTGT	3'	Yes	gp1a	......((((...((((((...((..(((((..((((.(((((.(((((......))))).))........))).))))..)))))..))...)))))).(((......)))..........))))....	86	56.2	-44.4	5	12	8	4.54284	10.1508	10.6792	middle
208	275	hsa-mir-449c-p5_1ss17GT	GTGTCAGGTAGGCAGTTT	18	chr5	-	55172246	55172356	aaagctgggatGTGTCAGGTAGGCAGTGTattgctagcggctgttaatgattttaacagttgctagttgcactcctctctgttgcattcagaagcacgccccccaaagaaa	3	hsa-mir-449c,ptr-mir-449c,cja-mir-449c,	hsa-mir-449c	gctgggatgtgtcaggTAGGCAGTGTATTGCTAGCGGCTGTtaatgattttaacagTTGCTAGTTGCACTCCTCTCTGTtgcattcagaagc	hsa-mir-449c-p5	gtgtcaggTAGGCAGTGT	5'	New	gp1a	...(((.((((((..(((..(((.((((((..((((((..(((((((.....)))))))..)))))))))))))))..)))..))))))...)))................	92	46.8	-44.5	0	9	0	0	7.61309	0	low
209	276	hsa-miR-450a-5p	TTTTGCGATGTGTTCCTAATAT	22	X	-	134540341	134540431	aaacgatactaaactgtTTTTGCGATGTGTTCCTAATATgcactataaatatattgggaacattttgcatgtatagttttgtatcaatata	14	hsa-mir-450a-1,ptr-mir-450a-1,ppy-mir-450a-1,ppa-mir-450a-1,nle-mir-450a-1,mml-mir-450a-1,cja-mir-450b,mmu-mir-450a-1,eca-mir-450a,cfa-mir-450a,dno-mir-450a,ocu-mir-450a-1,cgr-mir-450a,tch-mir-450a-1,	hsa-mir-450a-1	aaacgatactaaactgtTTTTGCGATGTGTTCCTAATATgcactataaatatATTGGGAACATTTTGCATGTATagttttgtatcaatata	hsa-miR-450a-5p	TTTTGCGATGTGTTCCTAATAT	5'	Yes	gp1a	....(((((.(((((((...(((((..(((((((((((((.........)))))))))))))..)))))...))))))).)))))......	81	27.5	-34.3	23	14.5	8.5	20.8971	12.2655	11.3467	middle
210	277	hsa-miR-450b-5p_R-1	TTTTGCAATATGTTCCTGAAT	21	X	-	134540161	134540272	aatgtaagatgcagaattatTTTTGCAATATGTTCCTGAATatgtaatataagtgtattgggatcattttgcatccatagttttgtatcaacatatggagaaaagtctagga	13	hsa-mir-450b,ppy-mir-450b,ptr-mir-450b,ggo-mir-450b,mml-mir-450b,nle-mir-450b,bta-mir-450b,eca-mir-450b,cfa-mir-450b,ssc-mir-450b,pal-mir-450b,dno-mir-450b,ocu-mir-450b,	hsa-mir-450b	gcagaattatTTTTGCAATATGTTCCTGAATAtgtaatataagtgtaTTGGGATCATTTTGCATCCATAgttttgtat	hsa-miR-450b-5p	TTTTGCAATATGTTCCTGAATA	5'	Diff	gp1a	.((((..(((((((((((((...(((((.(((.((((.((((..(.......)..)))))))).))).)))))...))))))))))))).)))).((((......))))...	93	29.5	-31.1	12	7	14	10.9028	5.92129	18.6887	middle
211	278	hsa-miR-450a-5p	TTTTGCGATGTGTTCCTAATAT	22	X	-	134540495	134540607	ccaaagaaagatgctaaactatTTTTGCGATGTGTTCCTAATATgtaatataaatgtattggggacattttgcattcatagttttgtatcaataatatggggaaaagaggcta	20	hsa-mir-450a-2,mml-mir-450a-2,ptr-mir-450a-2,ppy-mir-450a-2,ggo-mir-450a,ppa-mir-450a-2,nle-mir-450a-2,mmu-mir-450a-2,bta-mir-450a-2,bta-mir-450a-1,eca-mir-450c,efu-mir-450,rno-mir-450b-2,rno-mir-450b-1,ssc-mir-450c,cpo-mir-450a-2,cpo-mir-450a-1,pal-mir-450a-1,ocu-mir-450a-2,chi-mir-450,	hsa-mir-450a-2	ccaaagaaagatgctaaactatTTTTGCGATGTGTTCCTAATATgtaatataaatgtATTGGGGACATTTTGCATTCATagttttgtatcaataatatgg	hsa-miR-450a-5p	TTTTGCGATGTGTTCCTAATAT	5'	Yes	gp1a	(((......(((((.(((((((...(((((..(((((((((((..(.......)..)))))))))))..)))))...))))))).))))).......))).............	81	31	-35	23	14.5	8.5	20.8971	12.2655	11.3467	middle
212	279	hsa-miR-451a_R+1	AAACCGTTACCATTACTGAGTTT	23	chr17	-	28861362	28861440	cttgggaatggcaaggAAACCGTTACCATTACTGAGTTTagtaatggtaatggttctcttgctatacccagaaaacgtg	14	hsa-mir-451a,ppy-mir-451,ptr-mir-451,mml-mir-451,cja-mir-451,mmu-mir-451a,bta-mir-451,chi-mir-451,cfa-mir-451,rno-mir-451,cpo-mir-451,dno-mir-451,ocu-mir-451,cgr-mir-451a,	hsa-mir-451a	cttgggaatggcaaggAAACCGTTACCATTACTGAGTTtagtaatggtaatggttctcttgctatacccaga	hsa-miR-451a	AAACCGTTACCATTACTGAGTT	5'	Diff	gp1a	.(((((.((((((((..(((((((((((((((((....)))))))))))))))))..)))))))).)))))........	70	41.8	-44.8	82	71	46	74.5026	60.0588	61.4056	middle
213	280	efu-miR-452	TCAGTCTCATCTGCAAAGAAGT	22	X	-	151959607	151959719	tataattgctaagcacttacaactgtttgcagaggaaactgagactttgtaactatgtcTCAGTCTCATCTGCAAAGAAGTaagtgctttgccaagctccttgagaggttagg	12	hsa-mir-452,ppy-mir-452,mml-mir-452,ptr-mir-452,ggo-mir-452,bta-mir-452,cfa-mir-452,efu-mir-452,rno-mir-452,cpo-mir-452,pal-mir-452,ocu-mir-452,	efu-mir-452	gcacttacaactgtttgcagaggaaactgagactttgtaactacatcTCAGTCTCATCTGCAAAGAAGTaagtgctttg	efu-miR-452	TCAGTCTCATCTGCAAAGAAGT	3'	Yes	gp1a	.......((.((((((((((..((..(((((((.((.((((((((...........)))))))).)).)))))))))..)))))))))).)).((.(((.....))).))...	85	40.7	-43.6	0	5	0	0	4.2295	0	low
214	281	hsa-miR-454-3p	TAGTGCAATATTGCTTATAGGGT	23	chr17	-	59137751	59137879	aaaaaattctgtttatcaccagatcctagaaccctatcaatattgtctctgctgtgtaaatagttctgagTAGTGCAATATTGCTTATAGGGTtttggtgtttggaaagaacaatgggcaggctgcaga	14	hsa-mir-454,ptr-mir-454,ppy-mir-454,ggo-mir-454,mml-mir-454,nle-mir-454,bta-mir-454,eca-mir-454,cfa-mir-454,ssc-mir-454,cpo-mir-454,pal-mir-454,dno-mir-454,chi-mir-454,	hsa-mir-454	tctgtttatcaccagatcctagaACCCTATCAATATTGTCTCTGCtgtgtaaatagttctgagTAGTGCAATATTGCTTATAGGGTtttggtgtttggaaagaacaatgggcagg	hsa-miR-454-3p	TAGTGCAATATTGCTTATAGGGT	3'	Yes	gp1a	.......(((((..(((.(((((..((((((((((((((((((((((((.(((((....)))))...)))....)))))))))...))))))))))))..)))))...))....)..))))).......	115	38	-40.2	0	0	5	0	0	6.67452	low
215	282	hsa-miR-455-5p	TATGTGCCTTTGGACTACATCG	22	chr9	+	114209417	114209529	gcgagcgcctgcgcccttccctggcgtgagggTATGTGCCTTTGGACTACATCGtggaagccagcaccatGCAGTCCATGGGCATATACACTtgcctcaaggcctatgtcatc	21	hsa-mir-455,ppy-mir-455,mml-mir-455,ptr-mir-455,ggo-mir-455,cja-mir-455,nle-mir-455,oga-mir-455,mmr-mir-455,mmu-mir-455,bta-mir-455,cfa-mir-455,cpo-mir-455,ocu-mir-455,efu-mir-455,rno-mir-455,cgr-mir-455,ssc-mir-455,dno-mir-455,chi-mir-455,tch-mir-455,	hsa-mir-455	tccctggcgtgagggTATGTGCCTTTGGACTACATCGtggaagccagcaccatGCAGTCCATGGGCATATACACttgcctcaaggcctatgtcatc	hsa-miR-455-5p	TATGTGCCTTTGGACTACATCG	5'	Yes	gp1a	(((((.(((((((((.......)))))(((((((((((((..((((((.(((.(((........))).))).))))))..))))))))).....)))).)))))).)))....	71	58.4	-46.8	16	14	0	14.5371	11.8426	0	middle
215	283	hsa-miR-455-3p_R+1_1ss9TC	GCAGTCCACGGGCATATACACT	22	chr9	+	114209417	114209529	gcgagcgcctgcgcccttccctggcgtgagggTATGTGCCTTTGGACTACATCGtggaagccagcaccatGCAGTCCATGGGCATATACACTtgcctcaaggcctatgtcatc	21	hsa-mir-455,ppy-mir-455,mml-mir-455,ptr-mir-455,ggo-mir-455,cja-mir-455,nle-mir-455,oga-mir-455,mmr-mir-455,mmu-mir-455,bta-mir-455,cfa-mir-455,cpo-mir-455,ocu-mir-455,efu-mir-455,rno-mir-455,cgr-mir-455,ssc-mir-455,dno-mir-455,chi-mir-455,tch-mir-455,	hsa-mir-455	tccctggcgtgagggTATGTGCCTTTGGACTACATCGtggaagccagcaccatGCAGTCCATGGGCATATACACttgcctcaaggcctatgtcatc	hsa-miR-455-3p	GCAGTCCATGGGCATATACAC	3'	Diff	gp1a	(((((.(((((((((.......)))))(((((((((((((..((((((.(((.(((........))).))).))))))..))))))))).....)))).)))))).)))....	71	58.4	-46.8	17	22	0	15.4457	18.6098	0	middle
216	284	hsa-miR-483-5p	AAGACGGGAGGAAAGAAGGGAG	22	chr11	-	2134111	2134222	ttgctgtgggggagagggggAAGACGGGAGGAAAGAAGGGAGtggttccatcacgcctcctcactcctctcctcccgtcttctcctctcctgcccttgtctccctgtctcag	3	hsa-mir-483,ggo-mir-483,cja-mir-483,	hsa-mir-483	gagggggAAGACGGGAGGAAAGAAGGGAGtggttccatcacgcctccTCACTCCTCTCCTCCCGTCTTctcctctc	hsa-miR-483-5p	AAGACGGGAGGAAAGAAGGGAG	5'	Yes	gp1a	..((...((((((((.((((((((((((((((.((.((.(((.(((........)))..))).)).)).)))))))))))))))))))))..)))..)).............	97	60.7	-54.1	25	35	42	22.7142	29.6065	56.066	middle
217	285	hsa-miR-484	TCAGGCTCAGTCCCCTCCCGAT	22	chr16	+	15643281	15643390	ctcgcggccctgcagcctcgTCAGGCTCAGTCCCCTCCCGATaaacccctaaatagggactttcccggggggtgaccctggcttttttggcgaaaacccccagtttaagg	13	hsa-mir-484,ppy-mir-484,ptr-mir-484,ggo-mir-484,ppa-mir-484,nle-mir-484,mml-mir-484,cja-mir-484,mmr-mir-484,bta-mir-484,ssc-mir-484,pal-mir-484,cgr-mir-484,	hsa-mir-484	agcctcgTCAGGCTCAGTCCCCTCCCGATaaacccctaaatagggactttcccggggggtgaccctggcttttttggcg	hsa-miR-484	TCAGGCTCAGTCCCCTCCCGAT	5'	Yes	gp1a	.(((((((......)))..((((((....(((.(((((((..(((.((((....))))..)))..))))))).))))))))).......)))).................	63	60	-37.8	301	217	391	273.479	183.56	521.947	high
218	286	hsa-miR-485-3p	GTCATACACGGCTCTCCTCTCT	22	chr14	+	101055407	101055515	ttcatgtgtggtacttggagagaggctggccgtgatgaattcgattcatcaaagcgaGTCATACACGGCTCTCCTCTCTtttagtgtcaaattctgcctcggagggctt	18	hsa-mir-485,ppy-mir-485,mml-mir-485,ptr-mir-485,ggo-mir-485,ppa-mir-485,cfa-mir-485,pal-mir-485,dno-mir-485,cja-mir-485,mmu-mir-485,bta-mir-485,eca-mir-485,efu-mir-485,rno-mir-485,ocu-mir-485,chi-mir-485,oar-mir-485,	hsa-mir-485	acttggagAGAGGCTGGCCGTGATGAATTCgattcatcaaagcgaGTCATACACGGCTCTCCTCTCTtttagt	hsa-miR-485-3p	GTCATACACGGCTCTCCTCTCT	3'	Yes	gp1a	........((..(((..((((((((..(((((((((((.((((...........)))))))).)))))))..))))))))..)))..))......((((....))))..	81	48.6	-44.1	7	8	5	6.35998	6.76719	6.67452	low
219	287	hsa-miR-486-5p_R-1	TCCTGTACTGAGCTGCCCCGA	21	chr8	+	41660430	41660518	cccaccccgaggtaTCCTGTACTGAGCTGCCCCGAgctgggcagcatgaagggcctcggggcagctcagtacaggatgccccagggagg	8	hsa-mir-486-2,ppa-mir-486-2,sbo-mir-486b,mml-mir-486,mmu-mir-486b,cfa-mir-486,rno-mir-486,pal-mir-486a-2,	hsa-mir-486-2	TCCTGTACTGAGCTGCCCCGAGctgggcagcatgaagggcctCGGGGCAGCTCAGTACAGGATg	hsa-miR-486-5p	TCCTGTACTGAGCTGCCCCGAG	5'	Diff	gp1a	.((.(((...((((((((((((((((((((((((((((...(.....)...)).))))))))))))))))))))))))))...))).))	88	67.4	-64.1	183.5	167.5	185	166.722	141.688	246.957	middle
220	288	hsa-miR-486-5p_R-1	TCCTGTACTGAGCTGCCCCGA	21	chr8	-	41660414	41660525	tctccatcctccctggggcaTCCTGTACTGAGCTGCCCCGAggcccttcatgctgcccagctcggggcagctcagtacaggatacctcggggtgggagtcagcaggaggtga	13	hsa-mir-486-1,ppy-mir-486,ptr-mir-486,ggo-mir-486,ppa-mir-486-1,sbo-mir-486a,oga-mir-486,mmr-mir-486,eca-mir-486,cpo-mir-486,pal-mir-486a-1,dno-mir-486,tch-mir-486,	hsa-mir-486-1	gcaTCCTGTACTGAGCTGCCCCGAGgcccttcatgctgcccagctCGGGGCAGCTCAGTACAGGATac	hsa-miR-486-5p	TCCTGTACTGAGCTGCCCCGAG	5'	Diff	gp1a	(((((.((((((((((((.(((((((((((((((((((((((((..........)))....)))))))))))))))))))))).)))))))).)))).......)))))...	109	64.3	-72.8	183.5	167.5	185	166.722	141.688	246.957	middle
221	289	hsa-miR-487b-3p	AATCGTACAGGGTCATCCACTT	22	chr14	+	101046432	101046556	ggctttcttttccgtgctaacctttggtacttggagagtggttatccctgtcctgttcgttttgctcatgtcgAATCGTACAGGGTCATCCACTTtttcagtatcaagagcgcagactctggagc	18	hsa-mir-487b,ppy-mir-487b,ptr-mir-487b,ggo-mir-487b,mml-mir-487b,cja-mir-487b,mmu-mir-487b,bta-mir-487b,eca-mir-487b,cfa-mir-487b,pal-mir-487b,rno-mir-487b,ssc-mir-487b,cpo-mir-487b,dno-mir-487b,ocu-mir-487b,chi-mir-487b,oar-mir-487b,	hsa-mir-487b	ttggtacttggagaGTGGTTATCCCTGTCCTGTTCGttttgctcatgtcgAATCGTACAGGGTCATCCACTTtttcagtatcaa	hsa-miR-487b-3p	AATCGTACAGGGTCATCCACTT	3'	Yes	gp1a	.((((.....((.(((((....(((((((((..((((((((....((((((...(((((............)))))...))))))....))))))))..)))))))))))))).)).....))))	124	48	-44.3	14	6	9	12.72	5.07539	12.0141	middle
222	290	hsa-miR-491-5p	AGTGGGGAACCCTTCCATGAGG	22	chr9	+	20716100	20716209	gggaattgacttagctgggtAGTGGGGAACCCTTCCATGAGGagtagaacactccttatgcaagattcccttctacctggctgggttggagtcatatcctgcaggtcctt	15	hsa-mir-491,ppy-mir-491,mml-mir-491,ptr-mir-491,ggo-mir-491,cja-mir-491,mmu-mir-491,bta-mir-491,eca-mir-491,ssc-mir-491,cpo-mir-491,dno-mir-491,tch-mir-491,ocu-mir-491,chi-mir-491,	hsa-mir-491	ttgacttagctgggtAGTGGGGAACCCTTCCATGAGGagtagaacactcCTTATGCAAGATTCCCTTCTACctggctgggttgg	hsa-miR-491-5p	AGTGGGGAACCCTTCCATGAGG	5'	Yes	gp1a	((((...(((..(((..(((((..(((((..(((.((((((((((.....)))))))))).))).)))))..)))))..)))..)))(((......)))......)))).	80	50.9	-52.3	12	0	0	10.9028	0	0	middle
223	291	hsa-miR-493-5p	TTGTACATGGTAGGCTTTCATT	22	chr14	+	100869050	100869164	ggggctcattctggcctccagggctTTGTACATGGTAGGCTTTCATTcattcgtttgcacattcggtgaaggtctactgtgtgccaggccctgtgccaggcatcgtgtagatgga	15	hsa-mir-493,ppy-mir-493,mml-mir-493,ggo-mir-493,ppa-mir-493,cja-mir-493,mmu-mir-493,bta-mir-493,eca-mir-493b,efu-mir-493,rno-mir-493,ssc-mir-493,pal-mir-493,chi-mir-493,oar-mir-493,	hsa-mir-493	ctggcctccagggctTTGTACATGGTAGGCTTTCATTcattcgtttgcacattcggTGAAGGTCTACTGTGTGCCAGGccctgtgccag	hsa-miR-493-5p	TTGTACATGGTAGGCTTTCATT	5'	Yes	gp1a	..........(((((...((((((((.(((((..((((((((((((...................))))))))))))..))))).)))))))).))))).((((.....))))..	89	53.9	-52.2	47	44	53	42.7027	37.2196	70.7499	middle
224	292	hsa-miR-494-3p_R+1	TGAAACATACACGGGAAACCTCT	23	chr14	+	101029611	101029724	ttttttgatcagtgctaatcttcgatactcgaaggagaggttgtccgtgttgtcttctctttatttatgaTGAAACATACACGGGAAACCTCTtttttagtatcaaatcccacc	18	hsa-mir-494,ppy-mir-494,eca-mir-494,cfa-mir-494,ptr-mir-494,ggo-mir-494,ppa-mir-494,cpo-mir-494,dno-mir-494,mml-mir-494,cja-mir-494,mmu-mir-494,bta-mir-494,efu-mir-494,rno-mir-494,ssc-mir-494,chi-mir-494,oar-mir-494,	hsa-mir-494	gatactcgaaggagAGGTTGTCCGTGTTGTCTTCTCTttatttatgaTGAAACATACACGGGAAACCTCttttttagtatc	hsa-miR-494-3p	TGAAACATACACGGGAAACCTC	3'	Diff	gp1a	.......................((((((.(((..(((((((..(((((((((.(((((.........)).)))))).))))))..)))))))..)))))))))..........	81	37.7	-34.9	75	33	66	68.1427	27.9147	88.1036	middle
225	293	hsa-miR-495-3p_R+1	AAACAAACATGGTGCACTTCTTT	23	chr14	+	101033734	101033841	cagggaggacgtgctcatctctggtacctgaaaagaagttgcccatgttattttcgctttatatgtgacgAAACAAACATGGTGCACTTCTTTttcggtatcaaatat	15	hsa-mir-495,mml-mir-495,cja-mir-495,ptr-mir-495,ppy-mir-495,ggo-mir-495,mmu-mir-495,bta-mir-495,eca-mir-495,efu-mir-495,rno-mir-495,cpo-mir-495,pal-mir-495,dno-mir-495,ocu-mir-495,	hsa-mir-495	tggtacctgaaaaGAAGTTGCCCATGTTATTTTCGctttatatgtgacgAAACAAACATGGTGCACTTCTTtttcggtatca	hsa-miR-495-3p	AAACAAACATGGTGCACTTCTT	3'	Diff	gp1a	.(((((.((.....)).)))))((((((..(((((((((.(((((((((..(((((.((.......)))))))..))))))).)))))))))))..))))))......	80	40.7	-38.3	19	0	0	17.2628	0	0	middle
226	294	hsa-miR-497-5p	CAGCAGCACACTGTGGTTTGT	21	chr17	-	7017906	7018027	tcaacccaccccggtcctgctcccgcccCAGCAGCACACTGTGGTTTGTacggcactgtggccacgtccaaaccacactgtggtgttagagcgagggtgggggaggcaccgccgaggcttgg	22	hsa-mir-497,mml-mir-497,ptr-mir-497,rno-mir-497,ppy-mir-497,ggo-mir-497,cja-mir-497,nle-mir-497,oga-mir-497,mmr-mir-497,pal-mir-497,mmu-mir-497a,bta-mir-497,eca-mir-497,mdo-mir-497,efu-mir-497,ssc-mir-497,cpo-mir-497,ocu-mir-497,tch-mir-497,chi-mir-497,cgr-mir-497,	hsa-mir-497	ccaccccggtcctgctcccgcccCAGCAGCACACTGTGGTTTGTacggcactgtggccacgtcCAAACCACACTGTGGTGTTAGAgcgagggtgggggaggcaccgccgagg	hsa-miR-497-5p	CAGCAGCACACTGTGGTTTGT	5'	Yes	gp1a	.(((.((....(((((((.(((((((((.((((.((((.(((((((((.(((((......)))..)).))))))))).)))).)))).......)))))))))))).))))....)).))).	120	65.6	-57.1	5	13	5	4.54284	10.9967	6.67452	middle
227	295	hsa-miR-499a-5p	TTAAGACTTGCAGTGATGTTT	21	chr20	+	34990357	34990519	gccccgtccttcaccccctgccctgtcccctgtgccttgggcgggcggctgTTAAGACTTGCAGTGATGTTTaactcctctccacgtgaacatcacagcaagtctgtgctgcttcccgtccctacgctgcctgggcagggtttgtggggaaggggtgggagcc	20	hsa-mir-499a,ptr-mir-499,ppy-mir-499,ggo-mir-499a,mml-mir-499,cja-mir-499a,mmu-mir-499,bta-mir-499,eca-mir-499,cfa-mir-499,pal-mir-499a,efu-mir-499,rno-mir-499,ssc-mir-499,cpo-mir-499,ocu-mir-499,dno-mir-499,chi-mir-499,cgr-mir-499,tch-mir-499a,	hsa-mir-499a	gccctgtcccctgtgccttgggcgggcggctgTTAAGACTTGCAGTGATGTTTaactcctctccacgtgAACATCACAGCAAGTCTGTGCTgcttcccgtccctacgctgcctgggcagggt	hsa-miR-499a-5p	TTAAGACTTGCAGTGATGTTT	5'	Yes	gp1a	(((((..((((..(((...(((((((((.....((...(((((((..((.((..((((((((.((((((((((.............)))))))))).))))))))..)).))..)))).)))...)).....)))))))))....)))..))))..))).)).	162	62.6	-85.2	7	0	6	6.35998	0	8.00942	low
228	296	hsa-miR-500a-3p_L+1R-1_1ss22TA	AATGCACCTGGGCAAGGATTCA	22	X	+	50008412	50008521	tcacagggctttgtgttctgctccccctctctaatccttgctacctgggtgagagtgctgtctgaatgcAATGCACCTGGGCAAGGATTCTgagagcgagagcttcatct	21	hsa-mir-500a,ppy-mir-500,ptr-mir-500-1,ggo-mir-502b,mml-mir-500a,cja-mir-502b,nle-mir-502b,dma-mir-502b,oga-mir-500,oga-mir-502b,mmr-mir-502b,mmr-mir-500,bta-mir-500,chi-mir-500,cfa-mir-500,efu-mir-500,ssc-mir-500,pal-mir-500-2,pal-mir-500-1,dno-mir-500b,ocu-mir-500,	hsa-mir-500a	gctccccctctctAATCCTTGCTACCTGGGTgagagtgctgtctgaatgcaATGCACCTGGGCAAGGATTCTGagagcgagagc	hsa-miR-500a-3p	ATGCACCTGGGCAAGGATTCTG	3'	Diff	gp1a	....((..(.....)..))((((...(((((.(((((((((...(..((((....(((.........)))...))))..))))))))))..)))))...)))).......	84	52.7	-41.5	11	0	6	9.99426	0	8.00942	low
229	297	hsa-miR-501-3p	AATGCACCCGGGCAAGGATTCT	22	X	+	50009722	50009805	gctcttcctctctaatcctttgtccctgggtgagagtgctttctgaatgcAATGCACCCGGGCAAGGATTCTgagagggtgagc	2	hsa-mir-501,ptr-mir-501,	hsa-mir-501	gctcttcctctctAATCCTTTGTCCCTGGGTGAGAgtgctttctgaatgcAATGCACCCGGGCAAGGATTCTgagagggtgagc	hsa-miR-501-3p	AATGCACCCGGGCAAGGATTCT	3'	Yes	gp1a	((((..((((((.(((((((.(.(((.(((((....(((.........)))...))))))))))))))))..))))))..))))	84	53.6	-42.6	6	0	0	5.45141	0	0	low
230	298	hsa-miR-502-3p	AATGCACCTGGGCAAGGATTCA	22	X	+	50014579	50014690	gtgcccaagccttctgccctgctccccctctctaatccttgctatctgggtgctagtgctggctcaatgcAATGCACCTGGGCAAGGATTCAgagagggggagctcaactgt	9	hsa-mir-502,ptr-mir-502,ppy-mir-502,ggo-mir-502a,mml-mir-502,mmr-mir-502a,eca-mir-502,cfa-mir-502,ocu-mir-502a,	hsa-mir-502	tgctccccctctctaATCCTTGCTATCTGGGTGCTAgtgctggctcaatgcAATGCACCTGGGCAAGGATTCAgagagggggagct	hsa-miR-502-3p	AATGCACCTGGGCAAGGATTCA	3'	Yes	gp1a	....................((((((((((((((((((((((...(..(((((...(((.........)))..)))))..)))))))))).)))))))))))))........	84	57.1	-59	11	0	6	9.99426	0	8.00942	low
231	299	hsa-miR-503-5p_R-1	TAGCAGCGGGAACAGTTCTGCA	22	X	-	134546301	134546413	gcccgcgctcagccgtgcccTAGCAGCGGGAACAGTTCTGCAgtgagcgatcggtgctctggggtattgtttccgctgccagggtaagtctgggactgccgttcgggcctacc	5	hsa-mir-503,ptr-mir-503,ppy-mir-503,ggo-mir-503,mml-mir-503,	hsa-mir-503	tgcccTAGCAGCGGGAACAGTTCTGCAGtgagcgatcggtgctctGGGGTATTGTTTCCGCTGCCAGGgta	hsa-miR-503-5p	TAGCAGCGGGAACAGTTCTGCAG	5'	Diff	gp1a	((((((((((((...((((((.((((((((((((((.(..((..(((((.....)))))))..).)))))))))))))).))))))...))))).....))..))))).....	108	64.6	-55.2	14	69	21	12.72	58.367	28.033	middle
232	300	hsa-miR-505-3p_R+2	CGTCAACACTTGCTGGTTTCCTCT	24	X	-	139924126	139924237	taaattgatgcacccagtgggggagccaggaagtattgatgtttctgccagtttagCGTCAACACTTGCTGGTTTCCTCTctggagcatcgccaagttcgtggattttcatt	18	hsa-mir-505,mml-mir-505,eca-mir-505,ptr-mir-505,ppy-mir-505,ggo-mir-505,cja-mir-505,nle-mir-505,oga-mir-505,bta-mir-505,cfa-mir-505,rno-mir-505,ssc-mir-505,cpo-mir-505,dno-mir-505,ocu-mir-505,chi-mir-505,cgr-mir-505,	hsa-mir-505	gatgcacccagtggGGGAGCCAGGAAGTATTGATGTttctgccagtttagCGTCAACACTTGCTGGTTTCCTctctggagcatc	hsa-miR-505-3p	CGTCAACACTTGCTGGTTTCCT	3'	Diff	gp1a	......(((((..((((.(((((((((((.((((.((((((((...........)))))))).)))).))))))))))).)))).))))).(((......))).........	84	47.3	-48	9	0	31	8.17712	0	41.382	middle
233	301	hsa-miR-532-5p	CATGCCTTGAGTGTAGGACCGT	22	X	+	50003147	50003257	ccgacttgctttctctcctcCATGCCTTGAGTGTAGGACCGTtggcatcttaattacCCTCCCACACCCAAGGCTTGCAGaagagcgagccttctcttccctctccagtgc	20	hsa-mir-532,ppy-mir-532,ptr-mir-532,ggo-mir-532,ppa-mir-532,nle-mir-532,mmr-mir-532,dma-mir-532,tch-mir-532,mml-mir-532,cja-mir-532,mmu-mir-532,bta-mir-532,eca-mir-532,cfa-mir-532,efu-mir-532,rno-mir-532,ssc-mir-532,cpo-mir-532,chi-mir-532,	hsa-mir-532	cgacttgctttctctcctcCATGCCTTGAGTGTAGGACCGTtggcatcttaattacCCTCCCACACCCAAGGCTTGCAgaagagcgagcct	hsa-miR-532-5p	CATGCCTTGAGTGTAGGACCGT	5'	Yes	gp1a	..((...(((..((((.((.((.((((((.((((.(((..((.............))..))).)))).)))))).)).)).))))..)))..)).................	92	55	-30.6	25	37	24	22.7142	31.2983	32.0377	middle
233	302	hsa-miR-532-3p_R+1	CCTCCCACACCCAAGGCTTGCAA	23	X	+	50003147	50003257	ccgacttgctttctctcctcCATGCCTTGAGTGTAGGACCGTtggcatcttaattacCCTCCCACACCCAAGGCTTGCAGaagagcgagccttctcttccctctccagtgc	20	hsa-mir-532,ppy-mir-532,ptr-mir-532,ggo-mir-532,ppa-mir-532,nle-mir-532,mmr-mir-532,dma-mir-532,tch-mir-532,mml-mir-532,cja-mir-532,mmu-mir-532,bta-mir-532,eca-mir-532,cfa-mir-532,efu-mir-532,rno-mir-532,ssc-mir-532,cpo-mir-532,chi-mir-532,	hsa-mir-532	cgacttgctttctctcctcCATGCCTTGAGTGTAGGACCGTtggcatcttaattacCCTCCCACACCCAAGGCTTGCAgaagagcgagcct	hsa-miR-532-3p	CCTCCCACACCCAAGGCTTGCA	3'	Diff	gp1a	..((...(((..((((.((.((.((((((.((((.(((..((.............))..))).)))).)))))).)).)).))))..)))..)).................	92	55	-30.6	0	6	0	0	5.07539	0	low
234	303	hsa-miR-539-3p	ATCATACAAGGACAATTTCTTT	22	chr14	+	101047319	101047414	tcatacttgaggagaaattatccttggtgtgttcgctttatttatgatgaATCATACAAGGACAATTTCTTTttgagtatcaaatcttgcctcggc	13	hsa-mir-539,ppy-mir-539,mml-mir-539,ptr-mir-539,ggo-mir-539,bta-mir-539,eca-mir-539,cfa-mir-539,cpo-mir-539,dno-mir-539,ocu-mir-539,tch-mir-539,oar-mir-539,	hsa-mir-539	atacttgaGGAGAAATTATCCTTGGTGTGTtcgctttatttatgatgaATCATACAAGGACAATTTCTTTttgagtat	hsa-miR-539-3p	ATCATACAAGGACAATTTCTTT	3'	Yes	gp1a	..(((((..(..(((((((.((((((.((((((((.((.......)))))).)))))))))).)))))))..)..)))))........((....))	78	35.4	-29.1	0	5	8	0	4.2295	10.6792	middle
235	304	hsa-miR-543	AAACATTCGCGGTGCACTTCTT	22	chr14	+	101031963	101032070	gttgtcaacggtgctgacgtgcggtacttaatgagaagttgcccgtgtttttttcgctttatttgtgacgAAACATTCGCGGTGCACTTCTTtttcagtatcctattc	14	hsa-mir-543,ppy-mir-543,ptr-mir-543,ggo-mir-543,mml-mir-543,cja-mir-543,mmu-mir-543,bta-mir-543,eca-mir-543,cfa-mir-543,rno-mir-543,cpo-mir-543,pal-mir-543,dno-mir-543,	hsa-mir-543	tacttaatgagaagttgcccgtgtttttttcgctttatttgtgacgAAACATTCGCGGTGCACTTCTTtttcagtatc	hsa-miR-543	AAACATTCGCGGTGCACTTCTT	3'	Yes	gp1a	...((((.......))))....((((((.((..((((((.(((((((.(((..((((.......))))..)))....))))).))))))))..)).))))))......	80	43.5	-31.1	28	20	23	25.4399	16.918	30.7028	middle
236	305	hsa-miR-548ap-5p_R+3	AAAAGTAATTGCGGTCTTTGGT	22	chr22	-	26555212	26555323	gggcagccagtgaatagttagctggtgcAAAAGTAATTGCGGTCTTTGGTattactttcagtggcaaaaactgcattacttttgcaccagcctactagaacgctgagttcag	1	hsa-mir-548j,	hsa-mir-548j	gggcagccagtgaatagttagctggtgcAAAAGTAATTGCGGTCTTTggtattactttcagtggCAAAAACTGCATTACTTTTGCaccagcctactagaacgctgagttcag	hsa-miR-548ap-5p	AAAAGTAATTGCGGTCTTT	5'	Diff	gp1a	(..(...(((((..((((..(((((((((((((((((.(((((.((((..(((......)))..)))).))))))))))))))))))))))..))))...))))).)..)..	110	44.6	-50.5	0	0	6	0	0	8.00942	low
237	306	hsa-miR-548e-3p_L-1R-1	AAAACTGAGACTACTTTTGC	20	chr10	+	110988926	110989013	ttattaggttggtacaaaagcaatcgcggtttttgctattacttttaaaggcaAAAACTGAGACTACTTTTGCaccaacctgatagaa	1	hsa-mir-548e,	hsa-mir-548e	ttattaggttggtaCAAAAGCAATCGCGGTTTTTGCtattacttttaaaggcAAAAACTGAGACTACTTTTGCAccaacctgatagaa	hsa-miR-548e-3p	AAAAACTGAGACTACTTTTGCA	3'	Diff	gp1a	(((((((((((((.((((((...((.((((((((((..(((....)))..)))))))))).))...)))))).)))))))))))))..	86	35.2	-38.6	5	6	0	4.54284	5.07539	0	low
238	307	hsa-miR-561-5p	ATCAAGGATCTTAAACTTTGCC	22	chr2	+	188297492	188297588	cttcatccaccagtcctccaggaacATCAAGGATCTTAAACTTTGCCagagctacaaaggcaaagtttaagatccttgaagttcctgggggaaccat	3	hsa-mir-561,ggo-mir-561,nle-mir-561,	hsa-mir-561	cttcatccaccagtcctccaggaacATCAAGGATCTTAAACTTTGCCagagctacaaaggCAAAGTTTAAGATCCTTGAAGTtcctgggggaaccat	hsa-miR-561-5p	ATCAAGGATCTTAAACTTTGCC	5'	Yes	gp1a	.............((((((((((((.(((((((((((((((((((((...........))))))))))))))))))))).)))))))))))).....	79	45.4	-57.4	0	0	5	0	0	6.67452	low
239	308	hsa-miR-574-5p_R-2	TGAGTGTGTGTGTGTGAGTGT	21	chr4	+	38868022	38868131	gcgcggccgagggacctgcgtgggtgcgggcgtgTGAGTGTGTGTGTGTGAGTGTgtgtcgctccgggtcCACGCTCATGCACACACCCACAcgcccacactcagggtct	14	hsa-mir-574,ggo-mir-574,ppa-mir-574,mml-mir-574,cfa-mir-574,pal-mir-574,ocu-mir-574,oga-mir-574,mmu-mir-574,efu-mir-574-2,ssc-mir-574,cpo-mir-574,dno-mir-574,cgr-mir-574,	hsa-mir-574	gggacctgcgtgggtgcgggcgtgTGAGTGTGTGTGTGTGAGTGTGTgtcgctccgggtcCACGCTCATGCACACACCCACAcgcccacactcagg	hsa-miR-574-5p	TGAGTGTGTGTGTGTGAGTGTGT	5'	Diff	gp1a	...........((((((...((((((.(((((((((...(((((((..((((((((..((......))..))))))))..))))))).))))))))).))))))))))))	99	67.3	-65.9	8	15	13	7.26855	12.6885	17.3537	middle
239	309	hsa-miR-574-3p	CACGCTCATGCACACACCCACA	22	chr4	+	38868022	38868131	gcgcggccgagggacctgcgtgggtgcgggcgtgTGAGTGTGTGTGTGTGAGTGTgtgtcgctccgggtcCACGCTCATGCACACACCCACAcgcccacactcagggtct	14	hsa-mir-574,ggo-mir-574,ppa-mir-574,mml-mir-574,cfa-mir-574,pal-mir-574,ocu-mir-574,oga-mir-574,mmu-mir-574,efu-mir-574-2,ssc-mir-574,cpo-mir-574,dno-mir-574,cgr-mir-574,	hsa-mir-574	gggacctgcgtgggtgcgggcgtgTGAGTGTGTGTGTGTGAGTGTGTgtcgctccgggtcCACGCTCATGCACACACCCACAcgcccacactcagg	hsa-miR-574-3p	CACGCTCATGCACACACCCACA	3'	Yes	gp1a	...........((((((...((((((.(((((((((...(((((((..((((((((..((......))..))))))))..))))))).))))))))).))))))))))))	99	67.3	-65.9	13	20	6	11.8114	16.918	8.00942	middle
240	310	hsa-miR-584-5p_R-1	TTATGGTTTGCCTGGGACTGA	21	chr5	-	149062304	149062414	tgacttagggtgaccagccaTTATGGTTTGCCTGGGACTGAggaatttgctgggatatgtcagttccaggccaaccaggctggttggtctccctgaagcaaccttcttgct	5	hsa-mir-584,ppy-mir-584,ptr-mir-584,ggo-mir-584,mml-mir-584,	hsa-mir-584	tagggtgaccagccaTTATGGTTTGCCTGGGACTGAGgaatttgctgggatatgTCAGTTCCAGGCCAACCAGGCTggttggtctccctgaagcaac	hsa-miR-584-5p	TTATGGTTTGCCTGGGACTGAG	5'	Diff	gp1a	....((((((.(((((((((...(((((.((((((((((((...(((......)))...)))))))))))).)))))...))))))))).)))))).((((.....)))).	92	52.3	-57.6	291	411	320	264.394	347.665	427.169	high
241	311	hsa-miR-589-5p_R-1	TGAGAACCACGTCTGCTCTGA	21	chr7	-	5495804	5495917	tccagcctgtgcccagcagccccTGAGAACCACGTCTGCTCTGAgctgggtactgcctgttcagaacaaatgccggttcccagacgctgccagctggccccgttcctctggatt	4	hsa-mir-589,ppy-mir-589,ggo-mir-589,mml-mir-589,	hsa-mir-589	tccagcctgtgcccagcagccccTGAGAACCACGTCTGCTCTGAGctgggtactgcctgtTCAGAACAAATGCCGGTTCCCAGAcgctgccagctggcc	hsa-miR-589-5p	TGAGAACCACGTCTGCTCTGAG	5'	Diff	gp1a	.((((.(((......(((((..(((.(((((.(((.((.(((((((.(((.....)))))))))).)).)))..))))).)))..))))))))))))..(((......)))...	96	61.4	-42.4	7	30	20	6.35998	25.377	26.6981	middle
242	312	hsa-miR-590-3p_R+1	TAATTTTATGTATAAGCTAGTC	22	chr7	+	74191193	74191303	tcctgtagccagtcagaaatgagcttattcataaaagtgcagtatggtgaagtcaatctgTAATTTTATGTATAAGCTAGTCtctgattgaaacatgcagcagctgtcttc	6	hsa-mir-590,ptr-mir-590,ppy-mir-590,ggo-mir-590,mmu-mir-590,eca-mir-590,	hsa-mir-590	tagccagtcagaaatGAGCTTATTCATAAAAGTGCAGtatggtgaagtcaatctgTAATTTTATGTATAAGCTAGTctctgattgaaacatgcagca	hsa-miR-590-3p	TAATTTTATGTATAAGCTAGT	3'	Diff	gp1a	..(((((..((((((((....(((((((.(((((((.(((((..(((.....)))..))))).))))))).)))))))....)))))))).....)))))...........	98	37.8	-34.9	11	5	0	9.99426	4.2295	0	low
243	313	hsa-miR-598-3p	TACGTCATCGTTGTCATCGTCA	22	chr8	-	11035201	11035312	caggaagatggcttgatgatgctgctgatgctggcggtgatcccgatggtgtgagctggaaatggggtgcTACGTCATCGTTGTCATCGTCAtcatcatcatccgagcagcc	6	hsa-mir-598,ppy-mir-598,mml-mir-598,ptr-mir-598,ggo-mir-598,eca-mir-598,	hsa-mir-598	gcttgatgatgctgctgatgctgGCGGTGATCCCGATGGTGTGAGCtggaaatggggtgcTACGTCATCGTTGTCATCGTCAtcatcatcatccgag	hsa-miR-598-3p	TACGTCATCGTTGTCATCGTCA	3'	Yes	gp1a	..........(((((..((((....(((((.((((((((((..(((((..((.(((............)))))..)))))..)))))))))).))))).)))))))))....	98	54.5	-42.9	12	0	0	10.9028	0	0	middle
244	314	hsa-miR-605-3p	AGAAGGCACTATGAGATTTAGA	22	chr10	+	51299573	51299655	gccctagcttggttctaaatcccatggtgccttctccttgggaaaaacagAGAAGGCACTATGAGATTTAGAatcaagttagg	1	hsa-mir-605,	hsa-mir-605	gccctagcttggttcTAAATCCCATGGTGCCTTCTCCTtgggaaaaacagAGAAGGCACTATGAGATTTAGAatcaagttagg	hsa-miR-605-3p	AGAAGGCACTATGAGATTTAGA	3'	Yes	gp1a	..(((((((((((((((((((.((((((((((((((..((.......)))))))))))))))).)))))))))))))))))))	81	44.6	-52.3	0	6	0	0	5.07539	0	low
245	315	hsa-miR-615-3p	TCCGAGCCTGGGTCTCCCTCTT	22	chr12	+	54033922	54034069	cgcttgcggctccggaggattccagcgactcgggaggggcgggaggggggtccccggtgctcggatctcgagggtgcttattgttcggTCCGAGCCTGGGTCTCCCTCTTccccccaaccccccctcagcccctccggctgcagagtg	15	hsa-mir-615,ptr-mir-615,ggo-mir-615,ppa-mir-615,mmr-mir-615,mml-mir-615,cja-mir-615,oga-mir-615,mmu-mir-615,rno-mir-615,bta-mir-615,eca-mir-615,ssc-mir-615,cpo-mir-615,cgr-mir-615,	hsa-mir-615	ctcgggaggggcgggagGGGGGTCCCCGGTGCTCGGATCtcgagggtgcttattgttcggTCCGAGCCTGGGTCTCCCTCTTccccccaacccccc	hsa-miR-615-3p	TCCGAGCCTGGGTCTCCCTCTT	3'	Yes	gp1a	((((((((((..((((((......((((...(((.((((.((((((((((..(((((.(((((((((.(((..(...)..)))...))))))))))))))..))))))))))))))...)))...)).)).)))))))))))).))))	148	70.3	-79.8	6	6	5	5.45141	5.07539	6.67452	low
246	316	hsa-miR-625-3p_R+1	GACTATAGAACTTTCCCCCTCAT	23	chr14	+	65471102	65471186	agggtagagggatgagggggaaagttctatagtcctgtaattagatctcagGACTATAGAACTTTCCCCCTCATccctctgccct	1	hsa-mir-625,	hsa-mir-625	agggtagagggatgAGGGGGAAAGTTCTATAGTCCtgtaattagatctcagGACTATAGAACTTTCCCCCTCAtccctctgccct	hsa-miR-625-3p	GACTATAGAACTTTCCCCCTCA	3'	Diff	gp1a	(((((((((((((((((((((((((((((((((((((...........)))))))))))))))))))))))))))))))))))))	85	48.2	-74.9	26	13	12	23.6228	10.9967	16.0188	middle
247	317	hsa-miR-628-3p	TCTAGTAAGAGTGGCAGTCGA	21	chr15	-	55372921	55373034	atagctgttgtgtcacttcctcatgctgacatatttactagagggtaaaattaataacctTCTAGTAAGAGTGGCAGTCGAagggaagggctcatctgacttctggaaacctat	13	hsa-mir-628,ppy-mir-628,bta-mir-628,eca-mir-628a,cfa-mir-628,ptr-mir-628,ggo-mir-628,mml-mir-628,cja-mir-628,ssc-mir-628,dno-mir-628,chi-mir-628,tch-mir-628,	hsa-mir-628	atagctgttgtgtcacttcctcATGCTGACATATTTACTAGAGGgtaaaattaataacctTCTAGTAAGAGTGGCAGTCGAagggaagggctcat	hsa-miR-628-3p	TCTAGTAAGAGTGGCAGTCGA	3'	Yes	gp1a	.(((..((((.(((.((((((..(((((.((..(((((((((((((..........)))))))))))))..)).))).))..))))))))).))....))..))).........	104	41.2	-35.8	5	13	6	4.54284	10.9967	8.00942	middle
248	318	hsa-miR-629-5p	TGGGTTTACGTTGGGAGAACT	21	chr15	-	70079372	70079468	tccctttcccaggggaggggcTGGGTTTACGTTGGGAGAACTtttacggtgaaccaggaggttctcccaacgtaagcccagcccctcccctctgcct	2	hsa-mir-629,ppa-mir-629,	hsa-mir-629	tccctttcccaggggaggggcTGGGTTTACGTTGGGAGAACTtttacggtgaaccaggagGTTCTCCCAACGTAAGCCCAGCccctcccctctgcct	hsa-miR-629-5p	TGGGTTTACGTTGGGAGAACT	5'	Yes	gp1a	..........((((((((((((((((((((((((((((((((((...((....))..))))))))))))))))))))))))))))))))))......	81	59.8	-74.5	38	35	25	34.5256	29.6065	33.3726	middle
249	319	hsa-miR-651-5p_R-1	TTTAGGATAAGCTTGACTTTT	21	X	+	8126954	8127068	agatctacagaaatctatcactgcttTTTAGGATAAGCTTGACTTTTgttcaaataaaaatgcaaaaggaaagtgtatcctaaaaggcaatgacagtttaatgtgtttctgacat	3	hsa-mir-651,ggo-mir-651,cja-mir-651,	hsa-mir-651	aatctatcactgcttTTTAGGATAAGCTTGACTTTTGttcaaataaaaatgcaAAAGGAAAGTGTATCCTAAAAGgcaatgacagtttaatgtgttt	hsa-miR-651-5p	TTTAGGATAAGCTTGACTTTTG	5'	Diff	gp1a	(((..((((.....((.(((.((((((((((((((..(((..(((((((............)))))))..)))..)))))))))))))).))).)).....))))..))).....	110	31.3	-40.7	21	6	0	19.0799	5.07539	0	middle
250	320	hsa-miR-652-3p_R+1	AATGGCGCCACTAGGGTTGTGT	22	X	+	110055319	110055427	cagggccgccacgaatggctatgcactgcacaaccctaggagagggtgccattcacatagactataattgAATGGCGCCACTAGGGTTGTGCagtgcacaacctacaca	19	hsa-mir-652,eca-mir-652,ptr-mir-652,ppy-mir-652,ggo-mir-652,mml-mir-652,cja-mir-652a,mmu-mir-652,bta-mir-652,cfa-mir-652,ocu-mir-652,efu-mir-652,rno-mir-652,ssc-mir-652,cpo-mir-652,pal-mir-652,dno-mir-652,cgr-mir-652,tch-mir-652,	hsa-mir-652	acgaatggctatgcactgcaCAACCCTAGGAGAGGGTGCCATTCAcatagactataattgAATGGCGCCACTAGGGTTGTGcagtgcacaacctacac	hsa-miR-652-3p	AATGGCGCCACTAGGGTTGTG	3'	Diff	gp1a	.(((...((((....))))..((((((((((((((((((.....(((((((((((..((.....))..))))))))))).))))))))))))))))))...))).....	77	53.2	-58.7	42	51	41	38.1599	43.1409	54.731	middle
251	321	hsa-miR-654-5p_R+1	TGGTGGGCCGCAGAACATGTGCT	23	chr14	+	101040199	101040307	aggtggggctgagccctccagggtaagtggaaagaTGGTGGGCCGCAGAACATGTGCTgagttcgtgccaTATGTCTGCTGACCATCACCtttagaagccccctttcgc	8	hsa-mir-654,ppy-mir-654,mml-mir-654,ptr-mir-654,ggo-mir-654,ppa-mir-654,cja-mir-654,bta-mir-654,	hsa-mir-654	gggtaagtggaaagaTGGTGGGCCGCAGAACATGTGCtgagttcgtgccaTATGTCTGCTGACCATCACCTTtagaagccc	hsa-miR-654-5p	TGGTGGGCCGCAGAACATGTGC	5'	Diff	gp1a	(((.((((((..((((....))))......((((.((((((...((((.((((((((((....)).).)))))))))))...)))))).))))...)))))))))....	63	56.9	-43.7	7	0	0	6.35998	0	0	low
251	322	hsa-miR-654-3p_R-2	TATGTCTGCTGACCATCACC	20	chr14	+	101040199	101040307	aggtggggctgagccctccagggtaagtggaaagaTGGTGGGCCGCAGAACATGTGCTgagttcgtgccaTATGTCTGCTGACCATCACCtttagaagccccctttcgc	8	hsa-mir-654,ppy-mir-654,mml-mir-654,ptr-mir-654,ggo-mir-654,ppa-mir-654,cja-mir-654,bta-mir-654,	hsa-mir-654	gggtaagtggaaagaTGGTGGGCCGCAGAACATGTGCtgagttcgtgccaTATGTCTGCTGACCATCACCTTtagaagccc	hsa-miR-654-3p	TATGTCTGCTGACCATCACCTT	3'	Diff	gp1a	(((.((((((..((((....))))......((((.((((((...((((.((((((((((....)).).)))))))))))...)))))).))))...)))))))))....	63	56.9	-43.7	26	11	35	23.6228	9.30489	46.7216	middle
252	323	hsa-miR-656-3p	AATATTATACAGTCAACCTCT	21	chr14	+	101066696	101066803	ccctggagtcagtgctgctcagtggtacctgaaataggttgcctgtgaggtgttcactttctatatgatgAATATTATACAGTCAACCTCTttccgatatcgaatccc	12	hsa-mir-656,ppy-mir-656,ptr-mir-656,ggo-mir-656,mml-mir-656,bta-mir-656,eca-mir-656,cpo-mir-656,tch-mir-656,pal-mir-656,dno-mir-656,chi-mir-656,	hsa-mir-656	ctgaaatAGGTTGCCTGTGAGGTGTTCActttctatatgatgAATATTATACAGTCAACCTCTttccgatatcgaatc	hsa-miR-656-3p	AATATTATACAGTCAACCTCT	3'	Yes	gp1a	....(((.((.((((..(...)..))))..((((.((((((.(((((..(((((((...((.....)))))))))..))))).)))))).)))).......)).))).	64	44.4	-33.2	12	27	0	10.9028	22.8393	0	middle
253	324	hsa-miR-660-5p_R+1	TACCCATTGCATATCGGAGTTGT	23	X	+	50013236	50013345	atgaactgctccttctcccaTACCCATTGCATATCGGAGTTGTgaattctcaaaacacctcctgtgtgcatggattacaggagggtgagccttgtcatcgtgaatcttct	19	hsa-mir-660,ppy-mir-660,ptr-mir-660,ggo-mir-660,ppa-mir-660,oga-mir-660,mmr-mir-660,dma-mir-660,mml-mir-660,cja-mir-660,nle-mir-660,eca-mir-660,cfa-mir-660,efu-mir-660,ssc-mir-660,cpo-mir-660,pal-mir-660,dno-mir-660,ocu-mir-660,	hsa-mir-660	ctgctccttctcccaTACCCATTGCATATCGGAGTTGtgaattctcaaaacACCTCCTGTGTGCATGGATTAcaggagggtgagccttgtcatcgtg	hsa-miR-660-5p	TACCCATTGCATATCGGAGTTG	5'	Diff	gp1a	((((...((((..(((((.....(((.((((((..((((.(((...........))).))))..)))))))))......)))))..))))....))))............	98	46.4	-33.2	22	23	29	19.9885	19.4557	38.7122	middle
254	325	hsa-miR-664a-5p_L-1R-2	CTGGCTAGGGAAAATGATTGG	21	chr1	-	220200538	220200619	gaacattgaaaCTGGCTAGGGAAAATGATTGGatagaaactattattcTATTCATTTATCCCCAGCCTACAaaatgaaaaaa	4	hsa-mir-664a,ptr-mir-664a,ppy-mir-664,mml-mir-664,	hsa-mir-664a	gaacattgaaACTGGCTAGGGAAAATGATTGGATagaaactattattcTATTCATTTATCCCCAGCCTACAaaatgaaaaaa	hsa-miR-664a-5p	ACTGGCTAGGGAAAATGATTGGAT	5'	Diff	gp1a	...((((......((((.((((...(((.(((((((((.......))))))))).))))))).)))).....))))......	73	31.7	-23.9	0	8	5	0	6.76719	6.67452	low
254	326	hsa-miR-664a-3p	TATTCATTTATCCCCAGCCTACA	23	chr1	-	220200538	220200619	gaacattgaaaCTGGCTAGGGAAAATGATTGGatagaaactattattcTATTCATTTATCCCCAGCCTACAaaatgaaaaaa	4	hsa-mir-664a,ptr-mir-664a,ppy-mir-664,mml-mir-664,	hsa-mir-664a	gaacattgaaACTGGCTAGGGAAAATGATTGGATagaaactattattcTATTCATTTATCCCCAGCCTACAaaatgaaaaaa	hsa-miR-664a-3p	TATTCATTTATCCCCAGCCTACA	3'	Yes	gp1a	...((((......((((.((((...(((.(((((((((.......))))))))).))))))).)))).....))))......	73	31.7	-23.9	0	0	8	0	0	10.6792	middle
255	327	hsa-miR-744-5p	TGCGGGGCTAGGGCTAACAGCA	22	chr17	+	12081894	12081996	ctgggttgggcaaggTGCGGGGCTAGGGCTAACAGCAgtcttactgaaggtttcctggaaaccacgcacatgctgttgccactaacctcaaccttactcggtc	11	hsa-mir-744,ppy-mir-744,ptr-mir-744,mmu-mir-744,bta-mir-744,eca-mir-744,ssc-mir-744,cpo-mir-744,dno-mir-744,ocu-mir-744,cgr-mir-744,	hsa-mir-744	ttgggcaaggTGCGGGGCTAGGGCTAACAGCAgtcttactgaaggtttcctggaaaccacgcacatgCTGTTGCCACTAACCTCAACCTtactcggtc	hsa-miR-744-5p	TGCGGGGCTAGGGCTAACAGCA	5'	Yes	gp1a	...(..((((.(((((..((((.((((((.(((((((.((.....)).((((((...)))))).......)))))))))).))).)))).))))).))))..)	100	55.3	-40.1	166	92	92	150.822	77.8227	122.811	middle
256	328	hsa-miR-758-3p_R-1	TTTGTGACCTGGTCCACTAAC	21	chr14	+	101026015	101026114	cacgtgcctggatacatgagatggttgaccagagagcacacgctttatttgtgccgTTTGTGACCTGGTCCACTAACcctcagtatctaatgcccccttg	16	hsa-mir-758,ppy-mir-758,ptr-mir-758,ggo-mir-758,mmu-mir-758,bta-mir-758,eca-mir-758,cfa-mir-758,rno-mir-758,ssc-mir-758,cpo-mir-758,pal-mir-758,dno-mir-758,ocu-mir-758,chi-mir-758,oar-mir-758,	hsa-mir-758	gcctggatacatgaGATGGTTGACCAGAGAGCACACgctttatttgtgccgTTTGTGACCTGGTCCACTAACCctcagtatctaatgc	hsa-miR-758-3p	TTTGTGACCTGGTCCACTAACC	3'	Diff	gp1a	.....((.(((((((.((((.((((.((((((...(((.((((.........).))).)))...)))))).))))...)))))))))))..)).......	88	51	-30.2	10	17	11	9.08569	14.3803	14.6839	middle
257	329	hsa-miR-769-5p_R+2	TGAGACCTCTGGGTTCTGAGCTTT	24	chr19	+	46018932	46019060	gccttggtgctgattcctgggctctgaccTGAGACCTCTGGGTTCTGAGCTGTgatgttgctctcgagctgggatctccggggtcttggttcagggccggggcctctgggttccaagcaccagtgagga	9	hsa-mir-769,ggo-mir-769,ppa-mir-769,mml-mir-769,cja-mir-769,nle-mir-769,cfa-mir-769,ssc-mir-769,cpo-mir-769,	hsa-mir-769	gccttggtgctgattcctgggctctgaccTGAGACCTCTGGGTTCTGAGCTgtgatgttgctctcgagCTGGGATCTCCGGGGTCTTGGTTcagggccggggcctctgggttccaagc	hsa-miR-769-5p	TGAGACCTCTGGGTTCTGAGCT	5'	Diff	gp1a	.((((((((((........((((((((.(..(((((((.(((.((..((((.(((........)))))))..)).))).)))))))..).))))))))((..((....))..)).)))))))...))).	79	61.2	-63.7	6	0	9	5.45141	0	12.0141	middle
258	330	hsa-miR-877-5p_R+4	GTAGAGGAGATGGCGCAGGGGAAA	24	chr6	+	30584312	30584425	ctgctgagaggctagagaagGTAGAGGAGATGGCGCAGGGGACAcgggcaaagacttgggggttcctgggaccctcagacgtgtgtcctcttctccctcctcccaggtgtatga	10	hsa-mir-877,ptr-mir-877,ppy-mir-877,ggo-mir-877,mml-mir-877,nle-mir-877,dma-mir-877,mmu-mir-877,bta-mir-877,chi-mir-877,	hsa-mir-877	GTAGAGGAGATGGCGCAGGGgacacgggcaaagacttgggggttcctgggaccctcagacgtgtgTCCTCTTCTCCCTCCTCCCAG	hsa-miR-877-5p	GTAGAGGAGATGGCGCAGGG	5'	Diff	gp1a	(((((....))).))....((..((((((..((...(((((((((.(.......).((((((((.....)))))))).....)))))))))...))))))))))..........	85	59.6	-41.9	5	10	5	4.54284	8.45899	6.67452	low
259	331	hsa-miR-889-3p	TTAATATCGGACAACCATTGT	21	chr14	+	101047874	101047997	agctcttcttgatggcacagttctttggtgcttaaagaatggctgtccgtagtatggtctctatatttatgatgaTTAATATCGGACAACCATTGTtttagtatccaaatttgcttcagaagtt	13	hsa-mir-889,ppy-mir-889,mml-mir-889,ptr-mir-889,ggo-mir-889,ppa-mir-889,dno-mir-889,cja-mir-889,eca-mir-889,cfa-mir-889,cpo-mir-889,pal-mir-889,ocu-mir-889,	hsa-mir-889	gtgcttaaagAATGGCTGTCCGTAGTATGGTCtctatatttatgatgaTTAATATCGGACAACCATTGTtttagtatcc	hsa-miR-889-3p	TTAATATCGGACAACCATTGT	3'	Yes	gp1a	....((((.(((.((((......(((((((((.(((.(((((.((((((.....(..((((.........)).))..)....)))))).))))).))).)))).)))))..)))))))))))..	118	36.3	-34.9	9	19	12	8.17712	16.0721	16.0188	middle
260	332	hsa-miR-941	CACCCGGCTGTGTGCACATGTGC	23	chr20	+	63919505	63919576	tgtgcacatgtgcccagggcccgggacagcgccacggaagaggacgCACCCGGCTGTGTGCACATGTGCcca	4	hsa-mir-941-3,hsa-mir-941-5,hsa-mir-941-2,hsa-mir-941-4,	hsa-mir-941-3	tgtgcacatgtgcccagggcccgggacagcgccacggaagaggacgCACCCGGCTGTGTGCACATGTGCcca	hsa-miR-941	CACCCGGCTGTGTGCACATGTGC	3'	Yes	gp1a	.(.((((((((((.((..(((.(((...(((((........)).))).))))))..)).)))))))))).).	70	68.1	-37.7	5.5	3.5	0	4.99713	2.96065	0	low
261	333	hsa-miR-941	CACCCGGCTGTGTGCACATGTGC	23	chr20	+	63919449	63919520	tgtggacatgtgcccagggcccgggacagcgccacggaagaggacgCACCCGGCTGTGTGCACATGTGCcca	1	hsa-mir-941-1,	hsa-mir-941-1	tgtggacatgtgcccagggcccgggacagcgccacggaagaggacgCACCCGGCTGTGTGCACATGTGCcca	hsa-miR-941	CACCCGGCTGTGTGCACATGTGC	3'	Yes	gp1a	.(.((((((((((.((..(((.(((...(((((........)).))).))))))..)).)))))))).))).	70	68.1	-34.1	5.5	3.5	0	4.99713	2.96065	0	low
262	334	hsa-miR-1180-3p	TTTCCGGCTCGCGTGGGTGTGT	22	chr17	-	19344494	19344604	gccgcgagtcccggcggggcgaagcccgcggctgctggacccacccggccgggaatagtgctcctggttgTTTCCGGCTCGCGTGGGTGTGTcggcggcggggcctgacac	4	hsa-mir-1180,ppy-mir-1180,ggo-mir-1180,mml-mir-1180,	hsa-mir-1180	gctgctGGACCCACCCGGCCGGGAATAgtgctcctggttgTTTCCGGCTCGCGTGGGTGTGTcggcggc	hsa-miR-1180-3p	TTTCCGGCTCGCGTGGGTGTGT	3'	Yes	gp1a	....(..(((((.(((((......))))).((((((((((((((.((((((((((((..((.....)))))))))))).)).))))))...)))))))))))))..)....	69	74.8	-58.1	7	0	0	6.35998	0	0	low
263	335	hsa-miR-1185-1-3p	ATATACAGGGGGAGACTCTTAT	22	chr14	+	101042971	101043080	ccactctttggtacttgaagagaggataccctttgtatgttcacttgattaatggcgaATATACAGGGGGAGACTCTTATttgcgtatcaaactctgtcgaggaagacgc	10	hsa-mir-1185-1,ppy-mir-1185-1,ptr-mir-1185-1,ppy-mir-1185-2,ggo-mir-1185,mml-mir-1185-1,mml-mir-1185-2,eca-mir-1185,cpo-mir-1185,pal-mir-1185,	hsa-mir-1185-1	tttggtacttgaagAGAGGATACCCTTTGTATGTTcacttgattaatggcgaATATACAGGGGGAGACTCTTATttgcgtatcaaa	hsa-miR-1185-1-3p	ATATACAGGGGGAGACTCTTAT	3'	Yes	gp1a	......((((((((..((((((((....(((..(((((((((.((........)).)))))))))..)))...))))).)))..))))))))....(((......)))..	86	43.6	-36.2	7	5	6	6.35998	4.2295	8.00942	low
264	336	hsa-miR-1197	TAGGACACATGGTCTACTTCT	21	chr14	+	101025550	101025673	caggggtcagcgtcacttcctggtatttgaagatgcggttgaccatggtgtgtacgctttatttgtgacgTAGGACACATGGTCTACTTCTtctcaatatcacatctcgccttggaagacttcc	11	hsa-mir-1197,ptr-mir-1197,ppy-mir-1197,ggo-mir-1197,bta-mir-1197,eca-mir-1197,cpo-mir-1197,dno-mir-1197,ocu-mir-1197,chi-mir-1197,oar-mir-1197,	hsa-mir-1197	acttcctggtatttgaagatgcggttgaccatggtgtgtacgctttatttgtgacgTAGGACACATGGTCTACTTCTtctcaatatca	hsa-miR-1197	TAGGACACATGGTCTACTTCT	3'	Yes	gp1a	..(..(((............(((((((.(((((...(((.(((((((.(((.((((.((.......))))))..)))))))))).))))))))..)))))))..(((......))).)))..).	82	47.6	-31.7	5	0	0	4.54284	0	0	low
265	337	hsa-mir-1245a-p5	TATGTATAGGCCTTTAGATC	20	chr2	+	188978092	188978161	attTATGTATAGGCCTTTAGATCatctgatgttgaatactctttaagtgatctaaaggcctacatataaa	2	hsa-mir-1245a,ppy-mir-1245,	hsa-mir-1245a	atttatgtataggcctttagatcatctgatgttgaatactctttAAGTGATCTAAAGGCCTACATataaa	hsa-mir-1245a-p5	tatgtataggcctttagatc	5'	New	gp1a	.(((((((.(((((((((((((((..(((.............)))..))))))))))))))).)))))))	69	30	-29.8	5	0	0	4.54284	0	0	low
266	338	hsa-miR-1246_R+1	AATGGATTTTTGGAGCAGGG	20	chr2	-	176600980	176601052	tgtatccttgAATGGATTTTTGGAGCAGGAgtggacacctgacccaaaggaaatcaatccataggctagcaat	2	hsa-mir-1246,ptr-mir-1246,	hsa-mir-1246	tgtatccttgAATGGATTTTTGGAGCAGGagtggacacctgacccaaaggaaatcaatccataggctagcaat	hsa-miR-1246	AATGGATTTTTGGAGCAGG	5'	Diff	gp1a	(((..(((...((((((((((((..((((........))))..))))).......))))))))))...)))..	71	43.8	-18.8	101.5	126	39	92.2197	106.583	52.0612	middle
267	339	hsa-miR-1260b_R+1_1ss9AG	ATCCCACCGCTGCCACCATT	20	chr11	+	96341427	96341534	gcggctgctgctctccgtttATCCCACCACTGCCACCATTattgctactgttcagcaggtgctgctggtggtgatggtgatagtctggtgggggcggtggggctgctg	6	hsa-mir-1260b,ptr-mir-1260b,ggo-mir-1260b,ppy-mir-1260b,mml-mir-1260b,nle-mir-1260b,	hsa-mir-1260b	tctccgtttATCCCACCACTGCCACCATtattgctactgttcagcaggtgctgctggtggtgatggtgatagtctggtgggggcggtgg	hsa-miR-1260b	ATCCCACCACTGCCACCAT	5'	Diff	gp1a	(((((.....(((.((((...((((((((((..(((((((((..(((.....((((....)))).)))..)))))))))..)))..))))))))))).))))))))..	106	60.2	-52.4	0	12	0	0	10.1508	0	middle
268	340	hsa-miR-1268b_L+1R+2	GCGGGCGTGGTGGTGGGGGTGGG	23	chr17	+	80098828	80098877	acCCGGGCGTGGTGGTGGGGGTGGGtgcctgtaattccagctagttggga	1	hsa-mir-1268b,	hsa-mir-1268b	accCGGGCGTGGTGGTGGGGGTGggtgcctgtaattccagctagttggga	hsa-miR-1268b	CGGGCGTGGTGGTGGGGGTG	5'	Diff	gp1a	.(((((((.(((...((..(((....)))..))...))))))...)))).	48	64	-15.5	5	0	0	4.54284	0	0	low
269	341	hsa-miR-1271-5p	CTTGGCACCTAGCAAGCACTCA	22	chr5	+	176367942	176368048	gcagcacccagatcagtgCTTGGCACCTAGCAAGCACTCAgtaaatatttgttgagtgcctgctatgtgccaggcattgtgctgagggctttgtggggattcagagg	5	hsa-mir-1271,ptr-mir-1271,ppy-mir-1271,ggo-mir-1271,mml-mir-1271,	hsa-mir-1271	cacccagatcagtgCTTGGCACCTAGCAAGCACTCAgtaaatatttgttgAGTGCCTGCTATGTGCCAGGCAttgtgctgagggct	hsa-miR-1271-5p	CTTGGCACCTAGCAAGCACTCA	5'	Yes	gp1a	..(((.(((((..(((((((((((((.(((((.(((((((..((....))..))))))).))))).)))))))))))))..))).))))).................	88	52.3	-53.4	0	0	5	0	0	6.67452	low
270	342	hsa-miR-1277-5p_L-3	TATATATATATATGTACGTAT	21	X	+	118386370	118386477	gcagaaatgcagtatccatttctaacctcccaaaTATATATATATATGTACGTATgtgtatataaatgtaTACGTAGATATATATGTATTTttggtgggtttaatttt	10	hsa-mir-1277,ppy-mir-1277,ggo-mir-1277,mml-mir-1277,bta-mir-1277,ssc-mir-1277,cpo-mir-1277,dno-mir-1277,ocu-mir-1277,tch-mir-1277,	hsa-mir-1277	acctcccAAATATATATATATATGTACGTATgtgtatataaatgtaTACGTAGATATATATGTATTTTtggtgggttt	hsa-miR-1277-5p	AAATATATATATATATGTACGTAT	5'	Diff	gp1a	(((....))).............((((..(((((.((((((((((((.((((((((..(......)..)))))))).)))))))))))).)))))..)))).......	78	26.9	-40.6	0	10	14	0	8.45899	18.6887	middle
270	343	hsa-miR-1277-3p_R-1	TACGTAGATATATATGTATTT	21	X	+	118386370	118386477	gcagaaatgcagtatccatttctaacctcccaaaTATATATATATATGTACGTATgtgtatataaatgtaTACGTAGATATATATGTATTTttggtgggtttaatttt	10	hsa-mir-1277,ppy-mir-1277,ggo-mir-1277,mml-mir-1277,bta-mir-1277,ssc-mir-1277,cpo-mir-1277,dno-mir-1277,ocu-mir-1277,tch-mir-1277,	hsa-mir-1277	acctcccAAATATATATATATATGTACGTATgtgtatataaatgtaTACGTAGATATATATGTATTTTtggtgggttt	hsa-miR-1277-3p	TACGTAGATATATATGTATTTT	3'	Diff	gp1a	(((....))).............((((..(((((.((((((((((((.((((((((..(......)..)))))))).)))))))))))).)))))..)))).......	78	26.9	-40.6	0	8	0	0	6.76719	0	low
271	344	hsa-miR-1290_1ss13TG	TGGATTTTTGGAGCAGGGA	19	chr1	-	18897071	18897148	gagcgtcacgttgacactcaaaaagtttcagattttggaacatttcggatttTGGATTTTTGGATCAGGGAtgctcaa	2	hsa-mir-1290,ptr-mir-1290,	hsa-mir-1290	gagcgtcacgttgacactcaaaaagtttcagattttggaacatttcggatttTGGATTTTTGGATCAGGGAtgctcaa	hsa-miR-1290	TGGATTTTTGGATCAGGGA	3'	Diff	gp1a	(((((((....(((...(((((((..((((((.(..(((....)))..).))))))))))))).)))..)))))))..	76	39.7	-21.1	41.5	51	28	37.7056	43.1409	37.3773	middle
272	345	hsa-miR-1296-5p_R+1	TTAGGGCCCTGGCTCCATCTCCA	23	chr10	-	63372942	63373063	tgaaatcaacgaatcacctacctaactgggTTAGGGCCCTGGCTCCATCTCCTttaggaaaaccttctgtggggagtggggcttcgaccctaacccaggtgggctgtaacactgctgtgttt	16	hsa-mir-1296,ppy-mir-1296,ptr-mir-1296,ggo-mir-1296,mml-mir-1296,cja-mir-1296,nle-mir-1296,ocu-mir-1296,oga-mir-1296,bta-mir-1296,eca-mir-1296,cfa-mir-1296,ssc-mir-1296,cpo-mir-1296,dno-mir-1296,chi-mir-1296,	hsa-mir-1296	acctacctaactgggTTAGGGCCCTGGCTCCATCTCCtttaggaaaaccttctgtgggGAGTGGGGCTTCGACCCTAACCcaggtgggctgt	hsa-miR-1296-5p	TTAGGGCCCTGGCTCCATCTCC	5'	Diff	gp1a	................((((((....((((((((((....((((((((..((..(((((.....)))))..))..))))))))....))))))))))))))))....(((((....))))).	87	52.5	-53.3	0	0	5	0	0	6.67452	low
273	346	hsa-miR-1299	TTCTGGAATTCTGTGTGAGGGA	22	chr9	-	40929010	40929092	cctcatggcagtgttctggaatcctacgtgagggacaatcattcagacccacgtagcagtgTTCTGGAATTCTGTGTGAGGGA	1	hsa-mir-1299,	hsa-mir-1299	cctcatggcagtgttctggaatcctacgtgagggacaatcattcagacccacgtagcagtgTTCTGGAATTCTGTGTGAGGGA	hsa-miR-1299	TTCTGGAATTCTGTGTGAGGGA	3'	Yes	gp1a	((((...((((..(((..((((.(((((((.((..............)))))))))....))))..)))..))))..))))..	81	50.6	-31.1	0	8	0	0	6.76719	0	low
274	347	hsa-miR-1301-3p_R+1	TTGCAGCTGCCTGGGAGTGACTTCT	25	chr2	-	25328616	25328746	ctctgccaagcgacccctagaatggggattgtggggggtcgctctaggcaccgcagcactgtgctggggatgTTGCAGCTGCCTGGGAGTGACTTCAcacagtcctctctgcctccagggtcacccggaac	6	hsa-mir-1301,ppy-mir-1301,ggo-mir-1301,cja-mir-1301,cfa-mir-1301,cpo-mir-1301,	hsa-mir-1301	ggattgtggggggtCGCTCTAGGCACCGCAGCActgtgctggggatgTTGCAGCTGCCTGGGAGTGACTTCacacagtcctc	hsa-miR-1301-3p	TTGCAGCTGCCTGGGAGTGACTTC	3'	Diff	gp1a	.((((......(((((.((((..((((((((((.(..((((((((((((.((.((((.....)))).))..((....)).)))).))))))))..).))))))))))))))......)))))...))))..	128	62.6	-58.7	24	5	20	21.8057	4.2295	26.6981	middle
275	348	hsa-miR-1307-5p	TCGACCGGACCTCGACCGGCT	21	chr10	-	103394253	103394401	catcaagacccagctgagtcactgtcactgcctaccaatcTCGACCGGACCTCGACCGGCTcgtctgtgttgccaatcgACTCGGCGTGGCGTCGGTCGTGGtagataggcggtcatgcatacgaattttcagctcttgttctggtgac	16	hsa-mir-1307,ppy-mir-1307,ptr-mir-1307,ggo-mir-1307,ppa-mir-1307,nle-mir-1307,ocu-mir-1307,cja-mir-1307,mmr-mir-1307,dma-mir-1307,bta-mir-1307,eca-mir-1307,efu-mir-1307,ssc-mir-1307,pal-mir-1307,dno-mir-1307,	hsa-mir-1307	catcaagacccagctgagtcactgtcactgcctaccaatcTCGACCGGACCTCGACCGGCTcgtctgtgttgccaatcgACTCGGCGTGGCGTCGGTCGTGgtagataggcggtcatgcatacgaattttcagctcttgttctggtgac	hsa-miR-1307-5p	TCGACCGGACCTCGACCGGCT	5'	Yes	gp1a	(((((..((..(((((((((..(((.((((((((...(((.(((((((.((.((.(((..(((..((......))..)))..))))).))..))))))).)))...))))))))...)))...))...)))))))...))..)))))..	147	56.4	-56.1	26	18	28	23.6228	15.2262	37.3773	middle
275	349	hsa-miR-1307-3p_R+1	ACTCGGCGTGGCGTCGGTCGTGG	23	chr10	-	103394253	103394401	catcaagacccagctgagtcactgtcactgcctaccaatcTCGACCGGACCTCGACCGGCTcgtctgtgttgccaatcgACTCGGCGTGGCGTCGGTCGTGGtagataggcggtcatgcatacgaattttcagctcttgttctggtgac	16	hsa-mir-1307,ppy-mir-1307,ptr-mir-1307,ggo-mir-1307,ppa-mir-1307,nle-mir-1307,ocu-mir-1307,cja-mir-1307,mmr-mir-1307,dma-mir-1307,bta-mir-1307,eca-mir-1307,efu-mir-1307,ssc-mir-1307,pal-mir-1307,dno-mir-1307,	hsa-mir-1307	catcaagacccagctgagtcactgtcactgcctaccaatcTCGACCGGACCTCGACCGGCTcgtctgtgttgccaatcgACTCGGCGTGGCGTCGGTCGTGgtagataggcggtcatgcatacgaattttcagctcttgttctggtgac	hsa-miR-1307-3p	ACTCGGCGTGGCGTCGGTCGTG	3'	Diff	gp1a	(((((..((..(((((((((..(((.((((((((...(((.(((((((.((.((.(((..(((..((......))..)))..))))).))..))))))).)))...))))))))...)))...))...)))))))...))..)))))..	147	56.4	-56.1	48	15	37	43.6113	12.6885	49.3914	middle
276	350	hsa-miR-1843_R+3	TATGGAGGTCTCTGTCTGGCTTT	23	chr1	-	175968370	175968479	gcagcgatcctacataaataTATGGAGGTCTCTGTCTGGCTTAggacagctggctaagTCTGATCGTTCCCCTCCGTACagcctttaaaactgccactctaaatacttgg	3	hsa-mir-1843,cfa-mir-1843,rno-mir-1843b,	hsa-mir-1843	gcagcgatcctacataaataTATGGAGGTCTCTGTCTGGCttaggacagctggctaagtctgatcgttcccctccgtacagcctttaaaactgccactctaaatacttgg	hsa-miR-1843	TATGGAGGTCTCTGTCTGGC	5'	Diff	gp1a	((((................((((((((.....(((.(((((((.........))))))).)))......))))))))............))))................	58	47.3	-22.3	14	0	0	12.72	0	0	middle
276	351	rno-miR-1843b-3p	TCTGATCGTTCCCCTCCATAC	21	chr1	-	175968370	175968479	gcagcgatcctacataaataTATGGAGGTCTCTGTCTGGCTTAggacagctggctaagTCTGATCGTTCCCCTCCGTACagcctttaaaactgccactctaaatacttgg	3	hsa-mir-1843,cfa-mir-1843,rno-mir-1843b,	rno-mir-1843b	aacATGGAGGTCTCTGTCTGACTTAGgatagctggctaagTCTGATCGTTCCCCTCCATACa	rno-miR-1843b-3p	TCTGATCGTTCCCCTCCATAC	3'	Yes	gp1a	((((................((((((((.....(((.(((((((.........))))))).)))......))))))))............))))................	58	47.3	-22.3	0	0	5	0	0	6.67452	low
277	352	hsa-miR-2110_R+1	TTGGGGAAACGGCCGCTGAGTGA	23	chr10	-	114174105	114174179	caggggtTTGGGGAAACGGCCGCTGAGTGAggcgtcggctgtgtttctcaccgcggtcttttcctcccactcttg	1	hsa-mir-2110,	hsa-mir-2110	caggggtTTGGGGAAACGGCCGCTGAGTGaggcgtcggctgtgtttctcaccgcggtcttttcctcccactcttg	hsa-miR-2110	TTGGGGAAACGGCCGCTGAGTG	5'	Diff	gp1a	(((((((..(((((((.((((((.(.((((((...((....))..))))))))))))).)))))))..)))))))	75	61.3	-33.8	0	5	5	0	4.2295	6.67452	low
278	353	hsa-miR-2355-5p_R+1	ATCCCCAGATACAATGGACAAT	22	chr2	-	207109950	207110119	cattggccctttcagctacattcacgtgcatagaaaataacattgtcagacgtgtcATCCCCAGATACAATGGACAATatgctattataatcgtatggcatTGTCCTTGCTGTTTGGAGATAAtactgctgactttattcctctcatacatgtgaatgtggctgtaggga	9	hsa-mir-2355,ptr-mir-2355,ggo-mir-2355,ppa-mir-2355,ppy-mir-2355,cja-mir-2355,bta-mir-2355,cpo-mir-2355,ocu-mir-2355,	hsa-mir-2355	cagacgtgtcATCCCCAGATACAATGGACAAtatgctattataatcgtatggcATTGTCCTTGCTGTTTGGAGATaatactgctgac	hsa-miR-2355-5p	ATCCCCAGATACAATGGACAA	5'	Diff	gp1a	......((((..((((((((((((((((.(((((.(((((....(((((..((((.(((.((((((((((.(((((..(((((((.........))))))))))))))).))))))).))).))))..))))).)))))..))).)).)))))))))))))))).)))).	163	40.6	-70.8	0	9	0	0	7.61309	0	low
278	354	hsa-miR-2355-3p_L-2R+2	TGTCCTTGCTGTTTGGAGATAA	22	chr2	-	207109950	207110119	cattggccctttcagctacattcacgtgcatagaaaataacattgtcagacgtgtcATCCCCAGATACAATGGACAATatgctattataatcgtatggcatTGTCCTTGCTGTTTGGAGATAAtactgctgactttattcctctcatacatgtgaatgtggctgtaggga	9	hsa-mir-2355,ptr-mir-2355,ggo-mir-2355,ppa-mir-2355,ppy-mir-2355,cja-mir-2355,bta-mir-2355,cpo-mir-2355,ocu-mir-2355,	hsa-mir-2355	cagacgtgtcATCCCCAGATACAATGGACAAtatgctattataatcgtatggcATTGTCCTTGCTGTTTGGAGATaatactgctgac	hsa-miR-2355-3p	ATTGTCCTTGCTGTTTGGAGAT	3'	Diff	gp1a	......((((..((((((((((((((((.(((((.(((((....(((((..((((.(((.((((((((((.(((((..(((((((.........))))))))))))))).))))))).))).))))..))))).)))))..))).)).)))))))))))))))).)))).	163	40.6	-70.8	11	7	0	9.99426	5.92129	0	low
279	355	hsa-miR-3130-3p	GCTGCACCGGAGACTGGGTAA	21	chr2	-	206783234	206783308	cttgtcatgtcttacccagtctccggtgcagcctgttgtcaagGCTGCACCGGAGACTGGGTAAgacatgacaag	1	hsa-mir-3130-1,	hsa-mir-3130-1	cttgtcatgtctTACCCAGTCTCCGGTGCAGCCtgttgtcaagGCTGCACCGGAGACTGGGTAAgacatgacaag	hsa-miR-3130-3p	GCTGCACCGGAGACTGGGTAA	3'	Yes	gp1a	((((((((((((((((((((((((((((((((((.......))))))))))))))))))))))))))))))))))	75	54.7	-71.2	0	0	2.5	0	0	3.33726	low
280	356	hsa-miR-3130-3p	GCTGCACCGGAGACTGGGTAA	21	chr2	+	206783234	206783308	cttgtcatgtcttacccagtctccggtgcagccttgacaacagGCTGCACCGGAGACTGGGTAAgacatgacaag	1	hsa-mir-3130-2,	hsa-mir-3130-2	cttgtcatgtctTACCCAGTCTCCGGTGCAGCCttgacaacagGCTGCACCGGAGACTGGGTAAgacatgacaag	hsa-miR-3130-3p	GCTGCACCGGAGACTGGGTAA	3'	Yes	gp1a	((((((((((((((((((((((((((((((((((.......))))))))))))))))))))))))))))))))))	75	54.7	-69.9	0	0	2.5	0	0	3.33726	low
281	357	hsa-miR-3143_R-3	ATAACATTGTAAAGCGCTTCTT	22	chr6	+	27147626	27147688	tagATAACATTGTAAAGCGCTTCTTtcgcggttgggctggagcaactctttacaatgtttcta	1	hsa-mir-3143,	hsa-mir-3143	tagATAACATTGTAAAGCGCTTCTTTCGcggttgggctggagcaactctttacaatgtttcta	hsa-miR-3143	ATAACATTGTAAAGCGCTTCTTTCG	5'	Diff	gp1a	((((.((((((((((((.(((((..((.......))..)))))....))))))))))))))))	63	41.3	-20.4	0	0	5	0	0	6.67452	low
282	358	hsa-miR-3158-3p	AAGGGCTTCCTCTCTGCAGGAC	22	chr10	-	101601417	101601497	attcaggccggtcctgcagagaggaagcccttccaatacctgtaagcagAAGGGCTTCCTCTCTGCAGGACcggcctgaat	1	hsa-mir-3158-2,	hsa-mir-3158-2	attcaggccggtCCTGCAGAGAGGAAGCCCTTCcaatacctgtaagcagAAGGGCTTCCTCTCTGCAGGACcggcctgaat	hsa-miR-3158-3p	AAGGGCTTCCTCTCTGCAGGAC	3'	Yes	gp1a	(((((((((((((((((((((((((((((((((...............)))))))))))))))))))))))))))))))))	81	56.8	-70.7	2.5	0	0	2.27142	0	0	low
283	359	hsa-miR-3158-3p	AAGGGCTTCCTCTCTGCAGGAC	22	chr10	+	101601417	101601497	attcaggccggtcctgcagagaggaagcccttctgcttacaggtattggAAGGGCTTCCTCTCTGCAGGACcggcctgaat	1	hsa-mir-3158-1,	hsa-mir-3158-1	attcaggccggtCCTGCAGAGAGGAAGCCCTTCtgcttacaggtattggAAGGGCTTCCTCTCTGCAGGACcggcctgaat	hsa-miR-3158-3p	AAGGGCTTCCTCTCTGCAGGAC	3'	Yes	gp1a	(((((((((((((((((((((((((((((((((((((....)))...))))))))))))))))))))))))))))))))))	81	56.8	-74.1	2.5	0	0	2.27142	0	0	low
284	360	hsa-mir-3159-p3_1ss16TC	CCTGTAATCCCAGCACTTTGG	21	chr11	+	18387787	18387860	ccaaagtcctaggattacaagtgtcggccacgggctgggcacagtggctcacgCCTGTAATCCCAGCATTTTGG	1	hsa-mir-3159,	hsa-mir-3159	ccaaagtccTAGGATTACAAGTGTCGGCCACgggctgggcacagtggctcacgcctgtaatcccagcattttgg	hsa-mir-3159-p3	cctgtaatcccagcattttgg	3'	New	gp1a	(((((((.((.((((((((.((((..(((((..((...))...)))))..)))).)))))))).)).)))))))	74	56.8	-35.7	0	2.5	0	0	2.11475	0	low
285	361	hsa-miR-3615_R+2	TCTCTCGGCTCCTCGCGGCTCGC	23	chr17	+	74748613	74748699	gactctgggacgctcagacgccgcgcggggcggggattggtctgtggtccTCTCTCGGCTCCTCGCGGCTCGCggcggccgacggtt	1	hsa-mir-3615,	hsa-mir-3615	gactctgggacgctcagacgccgcgcggggcggggattggtctgtggtccTCTCTCGGCTCCTCGCGGCTCgcggcggccgacggtt	hsa-miR-3615	TCTCTCGGCTCCTCGCGGCTC	3'	Diff	gp1a	((((...((.((((..((.((((((.(((((.((((..((........))..)))).))))).))))))))..)))).))...))))	87	73.6	-42.8	0	5	0	0	4.2295	0	low
286	362	hsa-miR-3679-5p	TGAGGATATGGCAGGGAAGGGGA	23	chr2	+	134127125	134127192	cgtggTGAGGATATGGCAGGGAAGGGGAgtttccctctattcccttccccccagtaatcttcatcatg	1	hsa-mir-3679,	hsa-mir-3679	cgtggTGAGGATATGGCAGGGAAGGGGAgtttccctctattccCTTCCCCCCAGTAATCTTCATCatg	hsa-miR-3679-5p	TGAGGATATGGCAGGGAAGGGGA	5'	Yes	gp1a	((((((((((((.(((..((((((((((...........)))))))))).)))...))))))))))))	68	52.9	-33.5	0	6	24	0	5.07539	32.0377	middle
287	363	hsa-mir-3916-p5_1ss11AG	AGAAGGAAGAGGAGGAAGA	19	chr1	-	247201967	247202060	atcccagagaAGAAGGAAGAAGAGGAAGAaatggctggttctcaggtgaatgtgtctgggttcaggggatgtgtctcctcttttcttctgggat	1	hsa-mir-3916,	hsa-mir-3916	atcccagagaagaaggaagAAGAGGAAGAAATGGCTGGTTCTCAGgtgaatgtgtctgggttcaggggatgtgtctcctcttttcttctgggat	hsa-mir-3916-p5	agaaggaagAAGAGGAAGA	5'	New	gp1a	((((((((......((.(((((((((.((.....((((..(((((..(....)..))))).))))........)))))))))))))))))))))	94	47.9	-31.8	6	5	0	5.45141	4.2295	0	low
288	364	hsa-mir-3929-p5_1ss3AT	CCTGTAATCCCAGCACTTTGG	21	chr18	-	35934088	35934142	agtggctcacaCCAGTAATCCCAGCACTTTGGgaggctgatgtgagtagaccact	1	hsa-mir-3929,	hsa-mir-3929	agtggctcacaccagtaatcccagcactttggGAGGCTGATGTGAGTAGACCACT	hsa-mir-3929-p5	ccagtaatcccagcactttgg	5'	New	gp1a	(((((((((((.((((..((((((....)))))).)))).))))))....)))))	55	52.7	-25.2	0	2.5	0	0	2.11475	0	low
289	365	hsa-mir-3976-p3_1ss16AT	AACCTTTACTGCAGCTTGAC	20	chr18	+	5840695	5840833	tgagggatatagagagcaggaagattaatgtcatattggagttggactgcagggcttcctttacacaataaatattgtatgaagtgctgatgtAACCTTTACTGCAGCATGACatgggatttggctgtttttatggctc	1	hsa-mir-3976,	hsa-mir-3976	tgagggaTATAGAGAGCAGGAAGATTAATGTcatattggagttggactgcagggcttcctttacacaataaatattgtatgaagtgctgatgtaacctttactgcagcatgacatgggatttggctgtttttatggctc	hsa-mir-3976-p3	aacctttactgcagcatgac	3'	New	gp1a	...(((.....((((((((..(((((.(((((((..((.(((.((..((((.(((...(((((.(((((....))))).))))).)))..))))..))..))).))..)))))))..)))))..))))))))....)))	136	40.3	-39.2	42	56	0	38.1599	47.3703	0	middle
290	366	hsa-miR-4433b-5p_R+1	ATGTCCCACCCCCACTCCTGTT	22	chr2	-	64340747	64340848	tgtgttccctatcctccttATGTCCCACCCCCACTCCTGTTtgaatatttcaccagaaaCAGGAGTGGGGGGTGGGACGTaaggaggatgggggaaagaaca	1	hsa-mir-4433b,	hsa-mir-4433b	tgtgttccctatcctccttATGTCCCACCCCCACTCCTGTttgaatatttcaccagaaaCAGGAGTGGGGGGTGGGACGTaaggaggatgggggaaagaaca	hsa-miR-4433b-5p	ATGTCCCACCCCCACTCCTGT	5'	Diff	gp1a	....((((((((((((((((((((((((((((((((((((((..............)))))))))).)))))))))))))))))))))))))))).......	91	52	-73.5	30	27	20	27.2571	22.8393	26.6981	middle
290	367	hsa-miR-4433b-3p_1ss8GC	CAGGAGTCGGGGGTGGGACGT	21	chr2	-	64340747	64340848	tgtgttccctatcctccttATGTCCCACCCCCACTCCTGTTtgaatatttcaccagaaaCAGGAGTGGGGGGTGGGACGTaaggaggatgggggaaagaaca	1	hsa-mir-4433b,	hsa-mir-4433b	tgtgttccctatcctccttATGTCCCACCCCCACTCCTGTttgaatatttcaccagaaaCAGGAGTGGGGGGTGGGACGTaaggaggatgggggaaagaaca	hsa-miR-4433b-3p	CAGGAGTGGGGGGTGGGACGT	3'	Diff	gp1a	....((((((((((((((((((((((((((((((((((((((..............)))))))))).)))))))))))))))))))))))))))).......	91	52	-73.5	17	21	5	15.4457	17.7639	6.67452	middle
291	368	hsa-miR-4508_L+2	AAGCGGGGCTGGGCGCGCG	19	chr15	-	23562062	23562131	aggaccCAGCGGGGCTGGGCGCGCGgagcagcgctgggtgcagcgcctgcgccggcagctgcaagggccg	1	hsa-mir-4508,	hsa-mir-4508	aggacccaGCGGGGCTGGGCGCGCGgagcagcgctgggtgcagcgcctgcgccggcagctgcaagggccg	hsa-miR-4508	GCGGGGCTGGGCGCGCG	5'	Diff	gp1a	.((.(((.((((.(((.((((((.((.((.((((...)))).)).)))))))))))..))))..))))).	68	80	-37.5	0	8	0	0	6.76719	0	low
292	369	hsa-miR-4521_R+1	GCTAAGGAAGTCCTGTGCTCAGT	23	chr17	+	8186945	8187004	tcgGCTAAGGAAGTCCTGTGCTCAGTtttgtagcatcaaaactaggatttctcttgttac	1	hsa-mir-4521,	hsa-mir-4521	tcgGCTAAGGAAGTCCTGTGCTCAGttttgtagcatcaaaactaggatttctcttgttac	hsa-miR-4521	GCTAAGGAAGTCCTGTGCTCAG	5'	Diff	gp1a	...((.(((((((((((......(((((((......))))))))))))))).)))))...	54	41.7	-16.8	0	0	5	0	0	6.67452	low
293	370	hsa-miR-6515-5p_R-1	TTGGAGGGTGTGGAAGACAT	20	chr19	+	12940484	12940540	caTTGGAGGGTGTGGAAGACATctgggccaactctgatctcttcatctaccccccag	1	hsa-mir-6515,	hsa-mir-6515	caTTGGAGGGTGTGGAAGACATCtgggccaactctgaTCTCTTCATCTACCCCCCAG	hsa-miR-6515-5p	TTGGAGGGTGTGGAAGACATC	5'	Diff	gp1a	..((((.(((((..(((((.(((.(((....))).))).)))))...))))).))))	55	54.4	-21.7	0	5	0	0	4.2295	0	low
294	371	hsa-miR-6516-5p_R-1	TTTGCAGTAACAGGTGTGAGC	21	chr17	+	77089417	77089497	tgggttttgaaTTTGCAGTAACAGGTGTGAGCattctagcagcagtttgatgatcatgtatgatactgcaaacaggaccta	1	hsa-mir-6516,	hsa-mir-6516	tgggttttgaaTTTGCAGTAACAGGTGTGAGCAttctagcagcagtttgatgATCATGTATGATACTGCAAACAggaccta	hsa-miR-6516-5p	TTTGCAGTAACAGGTGTGAGCA	5'	Diff	gp1a	(((((..((..(((((((((.((...((((.((((..(((....))).)))).))))...)).)))))))))))..)))))	81	40.7	-27.6	0	5	0	0	4.2295	0	low
295	372	hsa-miR-6780a-5p_L-2R+2	GGGAGGGAAGACAGCTGGAGAGT	23	chr17	-	42708084	42708151	gacacttGGGAGGGAAGACAGCTGGAGAGTatggtcacagcagcatcctcctctgttttctttcctag	1	hsa-mir-6780a,	hsa-mir-6780a	gacacTTGGGAGGGAAGACAGCTGGAGAgtatggtcacagcagcatcCTCCTCTGTTTTCTTTCCTAG	hsa-miR-6780a-5p	TTGGGAGGGAAGACAGCTGGAGA	5'	Diff	gp1a	......(((((..((((((((..((((..(.((.......))..)..)))).))))))))..))))).	61	51.5	-25.2	0	5	0	0	4.2295	0	low
296	373	hsa-miR-6852-5p	CCCTGGGGTTCTGAGGACATG	21	chr9	-	35710676	35710741	tgctgCCCTGGGGTTCTGAGGACATGctctgactcccctgatgtcctctgttcctcaggtgctggg	1	hsa-mir-6852,	hsa-mir-6852	tgctgCCCTGGGGTTCTGAGGACATGctctgactcccctgaTGTCCTCTGTTCCTCAGgtgctggg	hsa-miR-6852-5p	CCCTGGGGTTCTGAGGACATG	5'	Yes	gp1a	....(((((((((....((((((((...............))))))))....))))))).))....	58	60.6	-27	0	6	0	0	5.07539	0	low
297	374	hsa-miR-6855-5p	TTGGGGTTTGGGGTGCAGACATTGC	25	chr9	+	129869605	129869671	gctgcTTGGGGTTTGGGGTGCAGACATTGCcagaggatgggcagcagactgaccttcaaccccacag	1	hsa-mir-6855,	hsa-mir-6855	gctgcTTGGGGTTTGGGGTGCAGACATTGCcagaggatgggcagcAGACTGACCTTCAACCCCACAG	hsa-miR-6855-5p	TTGGGGTTTGGGGTGCAGACATTGC	5'	Yes	gp1a	.(((..(((((((..((((.(((...(((((........)))))....)))))))..))))))))))	66	59.7	-27.4	6	0	0	5.45141	0	0	low
298	375	hsa-miR-6891-5p_L+1R+1	GTAAGGAGGGGGATGAGGGGT	21	chr6	-	31355224	31355316	GTAAGGAGGGGGATGAGGGGTcatatctcttctcagggaaagcaggagcccttcagcagggtcagggcccctcatcttcccctcctttcccag	1	hsa-mir-6891,	hsa-mir-6891	gTAAGGAGGGGGATGAGGGGtcatatctcttctcagggaaagcaggagcccttcagcagggtcagggcCCCTCATCTTCCCCTCCTTTCccag	hsa-miR-6891-5p	TAAGGAGGGGGATGAGGGG	5'	Diff	gp1a	..((((((((((((((((((((....((((.((.((((...((....)))))).)).))))....)))))))))))..)))))))))......	85	59.1	-48.5	5	0	0	4.54284	0	0	low
299	376	hsa-mir-7703-p5_1ss3GA	GGAGAGGTGGATGAGTGG	18	chr14	-	24143489	24143565	ttaGGGGAGGTGGATGAGTGGgggcaggcaggggattggctaagaacctgactcttgcactctggccttctcccagg	1	hsa-mir-7703,	hsa-mir-7703	ttaggggaggtggatgagtgggggcaggcaggggattggctaagaacctgactcTTGCACTCTGGCCTTCTCCCAGG	hsa-mir-7703-p5	ggggaggtggatgagtgg	5'	New	gp1a	....(((((..((..(((((..((.((.((((..............)))).))))..)))))...))..)))))...	70	59.7	-29.7	0	5	7	0	4.2295	9.34433	low
300	377	hsa-mir-7852-p3	AGGCATATGTATGTAGTAGTCA	22	chr1	+	107897223	107897304	taaatgcctttgactactacatacatatgcctactactactttcatatgtAGGCATATGTATGTAGTAGTCAaaggcattta	1	hsa-mir-7852,	hsa-mir-7852	taaatgcctttgactactacatacatatgcctactactactttcatatgtaggcatatgTATGTAGTAGTCAAAGGCATTTa	hsa-mir-7852-p3	aggcatatgTATGTAGTAGTCA	3'	New	gp1a	((((((((((((((((((((((((((((((((((..............))))))))))))))))))))))))))))))))))	82	32.9	-56.1	0	6	0	0	5.07539	0	low
301	378	hsa-miR-7977_1ss6AG	TTCCCGGCCAACGCACCA	18	chr3	+	176515103	176515151	TTCCCAGCCAACGCACCAaaaatgatatgggtctgttgtctggagaaac	1	hsa-mir-7977,	hsa-mir-7977	TTCCCAGCCAACGCACCAaaaatgatatgggtctgttgtctggagaaac	hsa-miR-7977	TTCCCAGCCAACGCACCA	5'	Diff	gp1a	(((((((.(((((..(((.........)))...))))).)))).)))..	47	46.9	-14.2	0	5	0	0	4.2295	0	low
302	379	hsa-miR-10399-5p_R+1	AATTACAGATTGTCTCAGAGAA	22	chr7	-	139044100	139044157	AATTACAGATTGTCTCAGAGAAaacaaatgagttacTCTCTCGGACAAGCTGTAGGTC	1	hsa-mir-10399,	hsa-mir-10399	AATTACAGATTGTCTCAGAGAaaacaaatgagttactCTCTCGGACAAGCTGTAGGTC	hsa-miR-10399-5p	AATTACAGATTGTCTCAGAGA	5'	Diff	gp1a	..((((((.(((((..(((((.(((......)))..)))))..))))).))))))...	53	39.7	-19.3	0	0	5	0	0	6.67452	low
302	380	hsa-miR-10399-3p_L+1_1ss22CT	TCTCTCGGACAAGCTGTAGGTT	22	chr7	-	139044100	139044157	AATTACAGATTGTCTCAGAGAAaacaaatgagttacTCTCTCGGACAAGCTGTAGGTC	1	hsa-mir-10399,	hsa-mir-10399	AATTACAGATTGTCTCAGAGAaaacaaatgagttactCTCTCGGACAAGCTGTAGGTC	hsa-miR-10399-3p	CTCTCGGACAAGCTGTAGGTC	3'	Diff	gp1a	..((((((.(((((..(((((.(((......)))..)))))..))))).))))))...	53	39.7	-19.3	9	0	0	8.17712	0	0	low
303	381	hsa-miR-10526-3p	AAAAGGGGGCTGAGGTGGAG	20	chr11	-	122152103	122152156	tccccttagtttcctttaagagtgataaaaatggAAAAGGGGGCTGAGGTGGAG	1	hsa-mir-10526,	hsa-mir-10526	tccccttagtttcctttaagagtgataaaaatggAAAAGGGGGCTGAGGTGGAG	hsa-miR-10526-3p	AAAAGGGGGCTGAGGTGGAG	3'	Yes	gp1a	((((((((((..(((((....((.......))...)))))..))))))).))).	53	44.4	-22.4	0	6	0	0	5.07539	0	low
304	382	hsa-miR-11400_1ss20TC	TCGGCTGTGTATCTCTGTGCC	21	chr7	+	142474527	142474603	caagggcgacTCGGCTGTGTATCTCTGTGTCagaagcttagccacagtgtggcacagtcgtgtccttcctgctcaca	1	hsa-mir-11400,	hsa-mir-11400	caagggcgacTCGGCTGTGTATCTCTGTGTCagaagcttagccacagtgtggcacagtcgtgtccttcctgctcaca	hsa-miR-11400	TCGGCTGTGTATCTCTGTGTC	5'	Diff	gp1a	..((((.(((.(((((((((....(((((.............)))))....))))))))).)))..)))).......	68	55.8	-28.3	14	0	0	12.72	0	0	middle
305	383	hsa-miR-12136_R+7	GAAAAAGTCATGGAGGCCATGGGGT	25	chr1	-	632615	632685	GAAAAAGTCATGGAGGCCATGGGGTtggcttgaaaccagctttggggggttcgattccttccttttttgtc	1	hsa-mir-12136,	hsa-mir-12136	GAAAAAGTCATGGAGGCCatggggttggcttgaaaccagctttggggggttcgattccttccttttttgtc	hsa-miR-12136	GAAAAAGTCATGGAGGCC	5'	Diff	gp1a	(((((((.(((((...))))).((((((.......))))))..(..(((......)))..))))))))...	68	49.3	-19.2	12	5	0	10.9028	4.2295	0	middle
1	1	mmu-miR-326-3p	CCTCTGGGCCCTTCCTCCAGT	21	chr11	-	75335094	75335186	ctcatctgtctgttgggctggaggcagggcctttgtgaaggcgggtggtgctcagatcgCCTCTGGGCCCTTCCTCCAGCcccgaggcggatt	3	mmu-mir-326,rno-mir-326,cgr-mir-326,	mmu-mir-326	ctcatctgtctgttgggctGGGGGCAGGGCCTTTGTGAAGGCGggttatgctcagatcgCCTCTGGGCCCTTCCTCCAGTcccgaggcagattta	mmu-miR-326-3p	CCTCTGGGCCCTTCCTCCAGT	3'	Yes	gp1b	...((((((((...((((((((((.(((((((......((((((.((.....))..))))))..))))))).))))))))))..)))))))).	89	64.5	-55	47	47	38	42.7027	39.7573	50.7263	middle
2	2	mmu-miR-383-5p_L+1	CAGATCAGAAGGTGACTGTGGCT	23	chr8	-	14853436	14853509	tcctCAGATCAGAAGGTGATTGTGGCTttgggtggatattaatcagccacagcactgcctggtcagaaagagca	2	mmu-mir-383,rno-mir-383,	mmu-mir-383	ctcAGATCAGAAGGTGACTGTGGCTttgggtggatattaatcagCCACAGCACTGCCTGGTCAGAaagag	mmu-miR-383-5p	AGATCAGAAGGTGACTGTGGCT	5'	Diff	gp1b	...((.((((((..((((.((((((((...(((........)))))))))))))))..)))))).)).......	64	48.6	-26.4	0	5	0	0	4.2295	0	low
3	3	ssc-mir-1285-p5	GTAGTGGGATCGCGCCTGTGAATA	24	chr14	+	49586803	49586882	gctgatcaGTAGTGGGATCGCGCCTGTGAATAgccactgcaCTCCAGCCTGGGCAACATAGCGAGACcccgtctcttttg	1	ssc-mir-1285,	ssc-mir-1285	gctgatcagtagtgggatcgcgcctgtgaatagccactgtactccagcCTGGGCAACATAGCGAGACCCCGTctcttttg	ssc-mir-1285-p5	gtagtgggatcgcgcctgtgaata	5'	New	gp1b	.......((.((((((.((.((.(((((....(((...((......))...)))..))))))).)).)))).))))....	69	57.5	-21.9	0	6	0	0	5.07539	0	low
3	4	ssc-mir-1285-p3_1ss11GA	CTCCAGCCTGAGCAACATAGCGAGAC	26	chr14	+	49586803	49586882	gctgatcaGTAGTGGGATCGCGCCTGTGAATAgccactgcaCTCCAGCCTGGGCAACATAGCGAGACcccgtctcttttg	1	ssc-mir-1285,	ssc-mir-1285	gctgatcagtagtgggatcgcgcctgtgaatagccactgtactccagcCTGGGCAACATAGCGAGACCCCGTctcttttg	ssc-mir-1285-p3	ctccagcCTGGGCAACATAGCGAGAC	3'	New	gp1b	.......((.((((((.((.((.(((((....(((...((......))...)))..))))))).)).)))).))))....	69	57.5	-21.9	14	0	0	12.72	0	0	middle
4	5	mmr-miR-1839_L+1R-1	AAGGTAGATAGAACAGGTCTTG	22	chr15	+	82755999	82756078	cctaaatgaaAAGGTAGATAGAACAGGTCTTGtttgcaaaataaattcaagacctacttatctaccaacagcaattacac	11	mmr-mir-1839-3,mmr-mir-1839-2,mmr-mir-1839-4,mmr-mir-1839-1,mmu-mir-1839,bta-mir-1839,eca-mir-1839,cfa-mir-1839,rno-mir-1839,ssc-mir-1839,cgr-mir-1839,	mmr-mir-1839-3	AGGTAGATAGAACAGGTCTTGTttgcaaaataaattcaagacctacttatctaccaaca	mmr-miR-1839	AGGTAGATAGAACAGGTCTTGT	5'	Diff	gp1b	............(((((((((...((((((((.((........))..))))))))..)))))))))..............	54	33.8	-22.1	79	76	63	71.7769	64.2883	84.0989	middle
5	6	mmu-miR-1983	CTCACCTGGAGCATGTTTTCT	21	chr6	+	27631413	27631525	gaaagcatgctccagtggcgcaatcggttagcgcgcggtacttatacaacagtatatgtgcgggtgatgccgaggttgtgagttcgagcCTCACCTGGAGCATGTTTTCTtcc	1	mmu-mir-1983,	mmu-mir-1983	cctttacagagaaagcatgctccagtggcgcaatcggttagcgcgcggtacttatacagcagtatatgtgcgggtgatgccgaggttgtgagttcgagcCTCACCTGGAGCATGTTTTCTtccctttccgcc	mmu-miR-1983	CTCACCTGGAGCATGTTTTCT	3'	Yes	gp1b	(((((((((((((((........(((((...(((.((.(((.(((((....))))).))))).)))..)))))....(((((.......))))))))))))))))))))....	109	53.1	-49.4	8	10	7	7.26855	8.45899	9.34433	low
6	7	bta-miR-2904_R+3_1ss1GC	CGGAGCCTCGGTTGGCCTCGGA	22	chr21	+	8218601	8218669	acggcagcgccgCGGAGCCTCGGTTGGCCTCGGAtagccggtcccccgcctgtccccgccggcgggccg	3	bta-mir-2904-2,bta-mir-2904-3,bta-mir-2904-1,	bta-mir-2904-2	acggcagcgccgcGGGAGCCTCGGTTGGCCTCggatagccggtcccccgccgtccccgccggcgggccgt	bta-miR-2904	GGGAGCCTCGGTTGGCCTC	5'	Diff	gp1b	.((((..((((((((.(((......)))...((((((.(((....))).)))))))))).)))).))))	68	81.2	-37.4	0	5	0	0	4.2295	0	low
7	8	efu-mir-9277-p3_1ss16CT	CAGGTTCGAATCCTGTCGA	19	chr6	+	27503043	27503124	tcgtggccgagtggttaaggcgatggactagaaatccattggggtctccccgcgCAGGTTCGAATCCTGCCGActacgagtt	1	efu-mir-9277,	efu-mir-9277	tcgtggccgagtggttaaggcgatggacttgaaatccattggggtctccccgcgcaGGTTCGAATCCTGCCGACTACGCagttacgctt	efu-mir-9277-p3	caGGTTCGAATCCTGCCGA	3'	New	gp1b	((((((.((.((((...((((((((((.......))))))...))))..))))(((((.......))))))).))))))...	17	57.3	-26.4	5	11	0	4.54284	9.30489	0	low
8	9	pal-mir-10001-p5_1ss2GC	GCGCGGGCGGGGCCGGGGG	19	chr3	-	184315099	184315152	gaGGGCGGGCGGGGCCGGGGGctcctccctgcccgccgccaccgcctccctccc	1	pal-mir-10001,	pal-mir-10001	GAGGGCGGGCGGGGCCGGGggctcctccctgcccgcCGCCGCCACCTCCCTCCC	pal-mir-10001-p5	GGGCGGGCGGGGCCGGGgg	5'	New	gp1b	(((((.(((((((((.((((((........)))).))))).)))))))))))..	52	87	-38.1	0	5	0	0	4.2295	0	low
1	1	oga-miR-100_R+1	AACCCGTAGATCCGAACTTGTGA	23	chr11	-	122152258	122152345	gaggcctgttgccacaAACCCGTAGATCCGAACTTGTGGtattagtccgcacaagcttgtatctataggtatgtgtctgttaggcaat	1	oga-mir-100,	oga-mir-100	AACCCGTAGATCCGAACTTGTGatgatagtccacacaagcttgtgtctataggtatg	oga-miR-100	AACCCGTAGATCCGAACTTGTG	5'	Diff	gp2a	...(((((....((((.(((..(((((.(((.((((((...........)))))).))).)))))..))).)))).....)))))...	82	46.6	-30.9	17	25	15	15.4457	21.1475	20.0236	middle
2	2	mmu-miR-146a-5p_R+1	TGAGAACTGAATTCCATGGGTTT	23	chr5	+	160485335	160485469	gcaccatctctgaaaagccgatgtgtatcctcagcttTGAGAACTGAATTCCATGGGTTGtgtcagtgtcagacctctgaaattcagttcttcagctgggatatctctgtcatcgtgggcttgaggacctggaga	3	mmu-mir-146a,rno-mir-146a,dno-mir-146a,	mmu-mir-146a	agctcTGAGAACTGAATTCCATGGGTTatatcaatgtcagaCCTGTGAAATTCAGTTCTTCAGct	mmu-miR-146a-5p	TGAGAACTGAATTCCATGGGTT	5'	Diff	gp2a	...(((..(((...(((((.((((((((((.(((((..((((((((((((.((..((((.((.......))))))..)).)))))))))))).)))))))))).......)).))).)))))..)))..)))...	129	48.1	-50.5	375	391	344	340.713	330.747	459.207	high
3	3	mmu-miR-193a-5p	TGGGTCTTTGCGGGCAAGATGA	22	chr17	+	31560000	31560084	gatgggagctgagggcTGGGTCTTTGCGGGCGAGATGAgggtgtcggatcaactggcctacaaagtcccagttctcggcccccgg	5	mmu-mir-193a,rno-mir-193a,cgr-mir-193a,tch-mir-193a-2,tch-mir-193a-1,	mmu-mir-193a	gagagcTGGGTCTTTGCGGGCAAGATGAgagtgtcagttcAACTGGCCTACAAAGTCCCAGTcctc	mmu-miR-193a-5p	TGGGTCTTTGCGGGCAAGATGA	5'	Yes	gp2a	..((((.((((((..(((((.(((((..(((.((.(((..........))).)).)))..))))).)))))..)))))).)))).	82	63.5	-50.8	5	0	0	4.54284	0	0	low
4	4	mdo-miR-200a-3p_R+2	TAACACTGTCTGGTAACGATGTTT	24	chr1	+	1167867	1167947	gcccctgtgagcatcttaccggacagtgctggatttcccagcttgactcTAACACTGTCTGGTAACGATGTTCaaaggtga	2	mdo-mir-200a,sha-mir-200a,	mdo-mir-200a	gggcctctgtgggCATCTTACTAGACAGTGCTGGAtttttggatgtactcTAACACTGTCTGGTAACGATGTttaaagagggaacc	mdo-miR-200a-3p	TAACACTGTCTGGTAACGATGT	3'	Diff	gp2a	...(((.(((((((((((((((((((((((((.....)))))...........)))))))))))).)))))))).)))...	75	50.6	-39.7	14	43	9	12.72	36.3737	12.0141	middle
5	5	mdo-miR-203	GTGAAATGTTTAGGACCACTTG	22	chr14	+	104117418	104117501	gcgcgctgggtccagtggttcttaacagttcaacagttctgtagcgcaattGTGAAATGTTTAGGACCACTAGacccggcgggc	1	mdo-mir-203,	mdo-mir-203	agctgccctggtccagtggttcttaacagttcaacagttctgtgtagagattGTGAAATGTTTAGGACCACTTGatctggg	mdo-miR-203	GTGAAATGTTTAGGACCACTTG	3'	Yes	gp2a	((.(((((((((.(((((((((.((((.((((.((((..((.....)))))))))).)))).))))))))).))))))))).))	84	53.6	-45.8	0	10	0	0	8.45899	0	low
6	6	ssc-miR-339_R+1	TCCCTGTCCTCCAGGAGCTCAT	22	chr7	-	1022991	1023046	TCCCTGTCCTCCAGGAGCTCACgtgtgcctgcctgtgagcgcctcgacgacagagc	1	ssc-mir-339-2,	ssc-mir-339-2	taagacaaggTCCCTGTCCTCCAGGAGCTCAtggtccaatagaagcatatatacaaatggctctgaggggagatcccgctgtggct	ssc-miR-339	TCCCTGTCCTCCAGGAGCTCA	5'	Diff	gp2a	...(((((.((.(((.((((((..((....))..)))))).))).)).)))))...	50	66.1	-24.7	0	7	0	0	5.92129	0	low
7	7	ppy-mir-601-p3_1ss5AT	GAGGTGTCAGAAAAATTAC	19	chr7	-	120256056	120256130	gaaaagaggtttgattgactcacagttccacaggcttaacagtaagcatggctggGAGGTGTCAGAAAACTTACa	2	ppy-mir-601,mml-mir-601,	ppy-mir-601	tgcatgagttcatctTGGTCTAGGATTGTTGGAGGAGtcagaaaaattaccccagggatcctgaaatcctttgggtgga	ppy-mir-601-p3	GAGGAGtcagaaaaattac	3'	New	gp2a	...(((...((((((...(((.((((....((.(((((....))))).)))))).)))..))))))...)))...	69	44	-18.6	0	11	0	0	9.30489	0	low
8	8	mmu-mir-1946a-p5_1ss3CG	CAGAGGCAGGTGGATTTCTGA	21	chr11	+	23215058	23215139	ggaggCAGAGGCAGGTGGATTTCTGGagcccaggtgtttgagaccagcctgggcaatatggggaaaccctgtctctgccaaa	1	mmu-mir-1946a,	mmu-mir-1946a	aacttaaagaaatctatAGCCGGGCAGTGGTGGCACACACTTTTaatcccaacacttgtgaggcacaggcaggtggatttctgatcaaaggcatgcgccaccactctcggctttctcctctccttttttgttaa	mmu-mir-1946a-p5	cacaggcaggtggatttctga	5'	New	gp2a	...((((((((((((....(..(((..((((((((...........))))))))..)).)..)....))))))))))))...	76	57.3	-41.8	5	0	0	4.54284	0	0	low
9	9	mmu-miR-5106_L-1R-3_1ss20CT	GGTCTGTAGCTCAGTTGGT	19	chr15	+	78041302	78041360	ttaaccagtgaggaacaaacccagctgattcttggtaGGTCTGTAGCTCAGCTGGTggg	1	mmu-mir-5106,	mmu-mir-5106	cactcgagcaacaacaacagcaacaacccgagagcctatctagggcctAGGTCTGTAGCTCAGTTGGCAGAgt	mmu-miR-5106	AGGTCTGTAGCTCAGTTGGCAGA	3'	Diff	gp2a	...(((((((((..(((.(((..((..(...)..)).))).)))..)))).)))))...	53	50.8	-18.5	13	9	0	11.8114	7.61309	0	middle
10	10	mmu-miR-5119_1ss19GT	CATCTCATCCTGGGGCTGT	19	chr16	+	88594060	88594179	ttagatgcccctccctctctagctgCATCTCTTCCTGGGGCTGTaatgtcctctcctgcttgagccacagcggcccttcatggtcgatcgcatgcagatgggaggccaggggttttccag	1	mmu-mir-5119,	mmu-mir-5119	cagggctggcctatgggacagatactataagtCATCTCATCCTGGGGCTGGgtctgc	mmu-miR-5119	CATCTCATCCTGGGGCTGG	5'	Diff	gp2a	...((.((((((.((((((...((((((.((..((.((((((((..((..(((........))).))..))))))))....))..))....))))))..))))))..))))))..))...	114	58.3	-46.9	111	158	68	100.851	133.652	90.7734	middle
11	11	mmu-mir-6240-p5	ATGTGATTTCTGCCCAGTGCTCTGA	25	X	+	109054147	109054226	cgATGTGATTTCTGCCCAGTGCTCTGAatgtcaaagtgaagaaattcaatgaagcgcgggtaaacggcaggagtaactat	1	mmu-mir-6240,	mmu-mir-6240	ttgagaaaaacaaaaccaaaaaaccCCAAAGCATCGCGAAGGCCCACGGCGggtgttgactcgatgtgatttctgcccagtgctctgaaggtcaatgtgaagaaatgtgactctctt	mmu-mir-6240-p5	atgtgatttctgcccagtgctctga	5'	New	gp2a	....((.(((((((((...(((.(((....(((...((((....)))).)))....))))))...))))))))).))...	73	45	-24.8	318	227	126	288.925	192.019	168.198	middle
12	12	pal-mir-9226-p5_1ss18CT	TCCCTGTTCGGGCGCCATT	19	chr19	-	57513023	57513095	agaccttcttcactcacgTCCCTGTTCGGGCGCCACTtgtggctgtcggttcgggactgaatgaagaaggaca	1	pal-mir-9226,	pal-mir-9226	TCAAGTCCCTGTTCGGGCGCCActtgtcggaaaccagccgaccaagtcaaaccagGTACCTGAATGGGGGAGCAGGG	pal-mir-9226-p5	TCCCTGTTCGGGCGCCAct	5'	New	gp2a	...(((((((((.(((.(((((...((((..((((....))))..))))...)))))))).)))))))))...	67	56.2	-35.7	6	5	0	5.45141	4.2295	0	low
1	1	bta-miR-339a_R+1_1ss22CT	TCCCTGTCCTCCAGGAGCTCATT	23	chr20	-	630771	630807	aTCCCTGTCCTCCAGGAGCTCACTggctagcaggtga	5	bta-mir-339a,cfa-mir-339-1,ssc-mir-339-1,ssc-mir-339-2,pal-mir-339a,	bta-mir-339a	ggggcagccgctgTCCCTGTCCTCCAGGAGCTCACttggtccggccgtgcgctcctcgaggccagagcccgtgtctgc	bta-miR-339a	TCCCTGTCCTCCAGGAGCTCAC	5'	Diff	gp2b	.(((((((...((((.......))))...))))).))	36	59.5	-13	0	5	0	0	4.2295	0	low
2	2	mmu-miR-351-5p_R-3	TCCCTGAGGAGCCCTTTGAGC	21	chr17	-	78972192	78972279	tggggggagcgtgcctcccatgaggaggtggagggcttggtggagaagatccgcttccccatgatgcTCCCTGAGGAGCTCTTTGAGC	3	mmu-mir-351,rno-mir-351-1,rno-mir-351-2,	mmu-mir-351	catggcacctccgttTCCCTGAGGAGCCCTTTGAGCCTGgagtgaaaaaaaaaaacaGGTCAAGAGGCGCCTGGGAACtggagaagagtgttaaacttc	mmu-miR-351-5p	TCCCTGAGGAGCCCTTTGAGCCTG	3'	Diff	gp2b	...(((((((((((((((.....))))))...(((...((((((.....))))))..)))...))))))))).....((((...))))	69	62.5	-39.8	0	4	0	0	3.3836	0	low
3	2	mmu-miR-351-5p_R-3	TCCCTGAGGAGCCCTTTGAGC	21	chr3	-	37796224	37796290	TCCCTGAGGAGCCATTTGAGCtgaaggtgaaaggacaagcagaagtttaccagctaaacaagggagg	3	mmu-mir-351,rno-mir-351-1,rno-mir-351-2,	mmu-mir-351	catggcacctccgttTCCCTGAGGAGCCCTTTGAGCCTGgagtgaaaaaaaaaaacaGGTCAAGAGGCGCCTGGGAACtggagaagagtgttaaacttc	mmu-miR-351-5p	TCCCTGAGGAGCCCTTTGAGCCTG	5'	Diff	gp2b	(((((....(((....((((((....((..........))...))))))...))).....)))))..	65	49.3	-14.5	0	4	0	0	3.3836	0	low
4	3	bta-miR-378_R+1	ACTGGACTTGGAGTCAGAAGGCT	23	chr14	-	54641628	54641706	taaaggtcactgattctccacagaaaaattgttccacatagaaaaaaactatACTGGACTTGGAGTCAGAAGACTtgag	3	bta-mir-378-2,bta-mir-378c,ssc-mir-378b,	bta-mir-378-2	ggagagcACTGGACTTGGAGTCAGAAGGCtggagcttacagggcagcaccgtcatctactggtggagaactacgcc	bta-miR-378	ACTGGACTTGGAGTCAGAAGGC	3'	Diff	gp2b	...(((((.((((((((..((((.....))))((((.((((.......))))..))))...))))))))..)))))...	73	36.7	-16.8	6.5	6	4.5	5.9057	5.07539	6.00707	low
5	3	bta-miR-378_R+1	ACTGGACTTGGAGTCAGAAGGCT	23	chr3	-	31986279	31986391	cacagctgaagttcaggcagcaagaacACTGGACTTGGAGTCAGAAGGCCttggttcagaatcaactcctcctctttgagtttctgtttcttcctcagtaaaattaggcttca	1	bta-mir-378-2,	bta-mir-378-2	ggagagcACTGGACTTGGAGTCAGAAGGCtggagcttacagggcagcaccgtcatctactggtggagaactacgcc	bta-miR-378	ACTGGACTTGGAGTCAGAAGGC	5'	Diff	gp2b	......((((((..((((((.(((((.((..((((..(((..((.(((..((((((...))))))..))).)))))..))))...))))))).))..))....))..))))))	107	45.1	-23.1	6.5	6	4.5	5.9057	5.07539	6.00707	low
6	4	bta-miR-378c	ACTGGACTTGGAGTCAGAAGT	21	chr18	+	25301895	25301988	tgcttttgggtaacagcttgtggtgtgattcattattgatttcaccttgatgaaacaattgtagcaaaccaacACTGGACTTGGAGTCAGAAGT	2	bta-mir-378c,ssc-mir-378b,	bta-mir-378c	caaaaccaccACTGGACTTGGAGTCAGAAGTtccatgtgtgagtcttggtagggccagtggattgctaa	bta-miR-378c	ACTGGACTTGGAGTCAGAAGT	3'	Yes	gp2b	...(((..(((..(((....((((.((...((..((((.(((((......)))))))))))...)).))))...))).)))..)))........	83	39.4	-18.4	3.5	0	0	3.17999	0	0	low
7	5	bta-miR-1246_L-1R+3	ATGGATTTTTGGAGCAGGGAG	21	X	+	91798157	91798212	tatatcctctgtccgaggacaatatattacATGGATTTTTGGAGCAGGGAGatgga	1	bta-mir-1246,	bta-mir-1246	caacatattaAATGGATTTTTGGAGCAGGaagttggaatagaggctttctcagacaaatactttactgtgcag	bta-miR-1246	AATGGATTTTTGGAGCAGG	3'	Diff	gp2b	..((((((((((((((..(...(((.....)))..)..))))).))))).))))..	52	41.1	-14.6	235	238	197.5	213.514	201.324	263.643	middle
8	5	bta-miR-1246_L-1R+3	ATGGATTTTTGGAGCAGGGAG	21	Y	+	5019140	5019195	tgtatcctctgtccgaggacaatatattacATGGATTTTTGGAGCAGGGAGatgga	1	bta-mir-1246,	bta-mir-1246	caacatattaAATGGATTTTTGGAGCAGGaagttggaatagaggctttctcagacaaatactttactgtgcag	bta-miR-1246	AATGGATTTTTGGAGCAGG	3'	Diff	gp2b	..((((((((((((((..(...(((.....)))..)..))))).))))).))))..	52	42.9	-14.6	235	238	197.5	213.514	201.324	263.643	middle
9	6	bta-miR-1246_R+3	AATGGATTTTTGGAGCAGGGAG	22	chr13	+	20612240	20612286	aAATGGATTTTTGGAGCAGGGAGattgaataggaccttgctccatct	1	bta-mir-1246,	bta-mir-1246	caacatattaAATGGATTTTTGGAGCAGGaagttggaatagaggctttctcagacaaatactttactgtgcag	bta-miR-1246	AATGGATTTTTGGAGCAGG	5'	Diff	gp2b	...........((((((((((.............))))))))))...	33	42.6	-16	536.5	494	451.5	487.447	417.874	602.709	high
10	6	bta-miR-1246_R+3	AATGGATTTTTGGAGCAGGGAG	22	chr14	+	96384716	96384762	aAATGGATTTTTGGAGCAGGGAGatagaataggctcttgctccatta	1	bta-mir-1246,	bta-mir-1246	caacatattaAATGGATTTTTGGAGCAGGaagttggaatagaggctttctcagacaaatactttactgtgcag	bta-miR-1246	AATGGATTTTTGGAGCAGG	5'	Diff	gp2b	...........((((((((((.............))))))))))...	33	40.4	-15.8	536.5	494	451.5	487.447	417.874	602.709	high
11	7	bta-miR-1246_L+1R+4	AAATGGATTTTTGGAGCAGGGAGT	24	chr17	-	43239923	43240019	gctaagatcaagtgtagtatctgttcttatcagtttaatatctgatacgtcctctatccgaggacaatatattAAATGGATTTTTGGAGCAGGGAGA	1	bta-mir-1246,	bta-mir-1246	caacatattaAATGGATTTTTGGAGCAGGaagttggaatagaggctttctcagacaaatactttactgtgcag	bta-miR-1246	AATGGATTTTTGGAGCAGG	3'	Diff	gp2b	(((((((((.....((((((.......((((((........)))))).((((((.....))))))...))))))....))))))...))).......	90	36.1	-24	0	0	2.5	0	0	3.33726	low
12	7	bta-miR-1246_L+1R+4	AAATGGATTTTTGGAGCAGGGAGT	24	chr3	-	128075148	128075211	AAATGGATTTTTGGAGCAGGGAGAtggaataggaccttgctctttccactccatgcatccacct	1	bta-mir-1246,	bta-mir-1246	caacatattaAATGGATTTTTGGAGCAGGaagttggaatagaggctttctcagacaaatactttactgtgcag	bta-miR-1246	AATGGATTTTTGGAGCAGG	5'	Diff	gp2b	...........(((((((.((((.(((((..((......))..))))))))).))).))))...	50	46.9	-22.4	0	0	2.5	0	0	3.33726	low
13	8	mmu-miR-1843b-5p_L+1	TATGGAGGTCTCTGTCTGACTT	22	chr1	-	175968435	175968498	ataTATGGAGGTCTCTGTCTGGCTTaggacagctggctaagtctgatcgttcccctccgtacag	3	mmu-mir-1843a,rno-mir-1843a,cgr-mir-1843,	mmu-mir-1843a	gaatATGGAGGTCTCTGTCTGACTTagaatagctggctgagTCTGATCGTTCACCTCCATACAac	mmu-miR-1843b-5p	ATGGAGGTCTCTGTCTGACTT	5'	Diff	gp2b	...((((((((.....(((.(((((((.........))))))).)))......))))))))...	58	51.6	-20.3	0	5	0	0	4.2295	0	low
14	9	mmu-miR-2137_L-2_1ss16AG	CGGCGGGAGCCCCGGGGAG	19	chr21	+	8260632	8260729	agatccccgaatccggagtggcggagatgggcgccgcgaggcgtccagtgcggtaacgcgaccgatcccggagaagcCGGCGGGAGCCCCGGGGAGag	1	mmu-mir-2137,	mmu-mir-2137	gtagtatacctccttcctgctgccttgttggcttGCCGGCGGGAGCCCCAGGGAGtagagcattgc	mmu-miR-2137	GCCGGCGGGAGCCCCAGGGAG	3'	Diff	gp2b	...((((((..(((((.....(((...((((((((....))))))))..(((....)))..)))...)))))......(((....))).))))))...	92	72.4	-51.3	0	4	0	0	3.3836	0	low
15	9	mmu-miR-2137_L-2_1ss16AG	CGGCGGGAGCCCCGGGGAG	19	chr5	+	71850930	71850967	tgaccgatcccggagaagcCGGCGGGAGCCCCGGGGAG	1	mmu-mir-2137,	mmu-mir-2137	gtagtatacctccttcctgctgccttgttggcttGCCGGCGGGAGCCCCAGGGAGtagagcattgc	mmu-miR-2137	GCCGGCGGGAGCCCCAGGGAG	3'	Diff	gp2b	.......((((((.......(((....)))))))))..	29	76.3	-14.3	0	4	0	0	3.3836	0	low
16	10	bta-miR-2478_L+2	TCGTATCCCACTTCTGACACCA	22	X	-	109562039	109562085	TCATATCCCACTTCTGACACCAtttaacgtcaaccaagaagaggcaa	1	bta-mir-2478,	bta-mir-2478	gttgggggtcggtggtgagcaagcagagactacataggttgccttGTATCCCACTTCTGACACCAtgtattgtcaac	bta-miR-2478	GTATCCCACTTCTGACACCA	5'	Diff	gp2b	.......((.((((((((..........))).....))))).))...	37	42.6	-6.2	0	0	2.5	0	0	3.33726	low
17	10	bta-miR-2478_L+2	TCGTATCCCACTTCTGACACCA	22	chr7	-	118920728	118920834	caatggacacaatgggtctgatgggtacctcactttgtcacttggcactcctgagggttgctaaaagctctactTTGTATCCCACTTCTGACACCAtctgttcaaaa	1	bta-mir-2478,	bta-mir-2478	gttgggggtcggtggtgagcaagcagagactacataggttgccttGTATCCCACTTCTGACACCAtgtattgtcaac	bta-miR-2478	GTATCCCACTTCTGACACCA	3'	Diff	gp2b	...((((((..(((((((.((((((..(((((...((((....))))....)))))...((.....))............))))..)).))).)))).))))))...	101	45.8	-29.8	0	0	2.5	0	0	3.33726	low
18	11	bta-miR-2478_L-1_1ss2TA	AATCCCACTTCTGACACCA	19	chr3	+	193612990	193613063	caccaggtcacctggtgttccagggggttgccagagtttttcttcaAATCCCACTTCTGACACCAgatctgtta	1	bta-mir-2478,	bta-mir-2478	gttgggggtcggtggtgagcaagcagagactacataggttgccttGTATCCCACTTCTGACACCAtgtattgtcaac	bta-miR-2478	GTATCCCACTTCTGACACCA	3'	Diff	gp2b	...((((((...(((((((..((((((((...((((...))))...)))))).))...)))))))))))))...	68	50	-24.9	3	0	2.5	2.72571	0	3.33726	low
19	11	bta-miR-2478_L-1_1ss2TA	AATCCCACTTCTGACACCA	19	chr4	+	150553694	150553793	ggagtcaAATCCCACTTCTGACACCAgattgtgtcaacctaaaaatagacactagagaaatttgtctccaaatatgttgagtttgtttgggaatgacaaa	1	bta-mir-2478,	bta-mir-2478	gttgggggtcggtggtgagcaagcagagactacataggttgccttGTATCCCACTTCTGACACCAtgtattgtcaac	bta-miR-2478	GTATCCCACTTCTGACACCA	5'	Diff	gp2b	...((((..((((.....((((((......))))))......((((((((....((((......))))(((.....))).)))))))))))).))))...	94	37	-23.5	3	0	2.5	2.72571	0	3.33726	low
20	12	bta-miR-2887_L+2R-1	GTCGGGACCGGGGTCCGGTGC	21	chr21	+	8218642	8218749	tcccccgcctgtccccgccggcgggccgcccccccctccacgcgccccgcgcgcgcgggagggcgcgtgccccgccgcgcGCCGGGACCGGGGTCCGGTGCggagtgc	2	bta-mir-2887-1,bta-mir-2887-2,	bta-mir-2887-1	cgtCGGGACCGGGGTCCGGTGCGgagagcccttcgtcccgggacacggggcgcggcc	bta-miR-2887	CGGGACCGGGGTCCGGTGCG	3'	Diff	gp2b	..(((((...(((((((((((((((((((....((((((.(((((.......))))))))))).))).).))))))).)))..))))))))))((((...))))....	91	88.9	-66	2.5	4.5	0	2.27142	3.80655	0	low
21	12	bta-miR-2887_L+2R-1	GTCGGGACCGGGGTCCGGTGC	21	chr21	+	8445912	8446019	tcccccgcctgtccccgccggcgggccgcccccccctccacgcgccccgcgcgcgcgggagggcgcgtgccccgccgcgcGCCGGGACCGGGGTCCGGTGCggagtgc	2	bta-mir-2887-1,bta-mir-2887-2,	bta-mir-2887-1	cgtCGGGACCGGGGTCCGGTGCGgagagcccttcgtcccgggacacggggcgcggcc	bta-miR-2887	CGGGACCGGGGTCCGGTGCG	3'	Diff	gp2b	..(((((...(((((((((((((((((((....((((((.(((((.......))))))))))).))).).))))))).)))..))))))))))((((...))))....	91	88.9	-66	2.5	4.5	0	2.27142	3.80655	0	low
22	13	mmu-miR-3968_L-3_1ss14AT	ATCCCACTCCTGACACCA	18	chr1	+	39950677	39950743	ATCCCACTCCTGACACCAgttgtttaggaaaaacctctcaaactgtgtttttcctctactgtcacac	2	mmu-mir-3968,bta-mir-2478,	mmu-mir-3968	acgccgagcgtgtggtggtaggatccgtgtagcaccgtctgtgtgttgttgtgccacacagagaacttgagCGAATCCCACTCCAGACACCAtgagtagg	mmu-miR-3968	CGAATCCCACTCCAGACACCA	5'	Diff	gp2b	..........(((((......((..(((((((((............)))))))))..)))))))...	54	43.3	-12.4	6	7.5	0	5.45141	6.34424	0	low
23	14	mmu-mir-3968-p3_1ss11AT	ATCCCACTCCTGACACCAT	19	chr10	-	95176733	95176774	ccaatggtgatcttgttcaaATCCCACTCCTGACACCATata	2	mmu-mir-3968,bta-mir-2478,	mmu-mir-3968	acgccgagcgtgtggtggtaggatccgtgtagcaccgtctgtgtgttgttgtgccacacagagaacttgagCGAATCCCACTCCAGACACCAtgagtagg	mmu-mir-3968-p3	ATCCCACTCCAGACACCAt	3'	New	gp2b	...((((((.((...................))))))))...	36	42.9	-6.9	7	12.5	4	6.35998	10.5737	5.33961	middle
24	14	mmu-mir-3968-p3_1ss11AT	ATCCCACTCCTGACACCAT	19	chr18	+	1691828	1691874	ctgggggttgttagaagctctacttcagATCCCACTCCTGACACCAT	2	mmu-mir-3968,bta-mir-2478,	mmu-mir-3968	acgccgagcgtgtggtggtaggatccgtgtagcaccgtctgtgtgttgttgtgccacacagagaacttgagCGAATCCCACTCCAGACACCAtgagtagg	mmu-mir-3968-p3	ATCCCACTCCAGACACCAt	3'	New	gp2b	..((((((.((..((((.....))))..))...))))))........	37	51.1	-9.5	7	12.5	4	6.35998	10.5737	5.33961	middle
25	15	mmu-miR-5106_R-4_1ss1AT	TGGTCTGTAGCTCAGTTGG	19	chr15	-	96411101	96411161	gtagtgattcTGGTCTGTAGCACAGTTGGaggaggggctgaagtgcgtccaagatcaccac	1	mmu-mir-5106,	mmu-mir-5106	cactcgagcaacaacaacagcaacaacccgagagcctatctagggcctAGGTCTGTAGCTCAGTTGGCAGAgt	mmu-miR-5106	AGGTCTGTAGCTCAGTTGGCAGA	5'	Diff	gp2b	((.(((((..(((......((((..(..(........)..).))))..)))..))))).))	61	54.1	-16.5	0	15	0	0	12.6885	0	middle
26	16	mmu-miR-5106_L-2_1ss20CT	GTCTGTAGCTCAGTTGGTAGA	21	chr18	-	70271957	70272056	tatttgccaggacttgaaatagctgtatcagatggggagcagttcagtgcatgtctggaaagacaggagctgagtgcaaGTCTGTAGGTCAGTTGGTAGA	1	mmu-mir-5106,	mmu-mir-5106	cactcgagcaacaacaacagcaacaacccgagagcctatctagggcctAGGTCTGTAGCTCAGTTGGCAGAgt	mmu-miR-5106	AGGTCTGTAGCTCAGTTGGCAGA	3'	Diff	gp2b	..((((((((((((((............(((((.....(((.((((((...(((((....)))))...)))))))))..)))))))))))..))))))))	98	47	-33	0	0	12	0	0	16.0188	middle
27	17	mmu-miR-5106_R-4_1ss1AG	GGGTCTGTAGCTCAGTTGG	19	chr7	-	47273759	47273802	tctgcccactggaggacagtAGGTCTGTAGCTCAGTTGGgcttc	1	mmu-mir-5106,	mmu-mir-5106	cactcgagcaacaacaacagcaacaacccgagagcctatctagggcctAGGTCTGTAGCTCAGTTGGCAGAgt	mmu-miR-5106	AGGTCTGTAGCTCAGTTGGCAGA	3'	Diff	gp2b	...(((((((((...((((.....))))...)))).)))))...	38	56.8	-17.4	6609	15248	710	6004.73	12898.3	947.782	high
28	18	mmu-mir-5110-p5_1ss18GC	AGAGGGTGGTGGAATTTC	18	chr18	-	61236140	61236220	ctccagattacaacctAGAGGGTGGTGGCATTTCtaccttgcattcaggctggaatcatctcctaggaaaataacctgtaa	1	mmu-mir-5110,	mmu-mir-5110	agcGGAGGAGGTAGAGGGTGGTGGAATTtgatgtcatctctgccactactggacagggctacgttgttctagccacttgccctgagt	mmu-mir-5110-p5	AGAGGGTGGTGGAATTtg	5'	New	gp2b	...(((.(((...(((((..((((((......((((.((((....)))).))))))))))..)))))....))).)))...	75	44.4	-19.9	27	91.5	10	24.5314	77.3998	13.349	middle
29	19	mmu-mir-5110-p5_1ss19GC	TAGAGGGTGGTGGAATTTC	19	chr4	+	10474809	10474849	gcTAGAGGGTGGTGGTATTTCtaaagataaagctctcttaa	1	mmu-mir-5110,	mmu-mir-5110	agcGGAGGAGGTAGAGGGTGGTGGAATTtgatgtcatctctgccactactggacagggctacgttgttctagccacttgccctgagt	mmu-mir-5110-p5	TAGAGGGTGGTGGAATTtg	5'	New	gp2b	...(((((((.....(((((....)))))..)))))))...	35	39	-8.7	10	15.5	4	9.08569	13.1114	5.33961	middle
30	20	mmu-miR-5119_L-1_1ss5TA	ATCACATCCTGGGGCTGG	18	chr1	-	95411071	95411098	atagcccagcATCACATCCTGGGCCTGG	1	mmu-mir-5119,	mmu-mir-5119	cagggctggcctatgggacagatactataagtCATCTCATCCTGGGGCTGGgtctgc	mmu-miR-5119	CATCTCATCCTGGGGCTGG	3'	Diff	gp2b	...((((((.........))))))....	21	60.7	-9.5	0	9	4	0	7.61309	5.33961	low
31	21	mmu-miR-5119_L+2R-1	CTCATCTCATCCTGGGGCTG	20	chr12	-	49041109	49041176	CTCATCTCGTCCTGGGGCTGgccagccaggggaattccacactaccccacctggcacccccagacacc	1	mmu-mir-5119,	mmu-mir-5119	cagggctggcctatgggacagatactataagtCATCTCATCCTGGGGCTGGgtctgc	mmu-miR-5119	CATCTCATCCTGGGGCTGG	5'	Diff	gp2b	........((.((((((...(((((...((((............))))..)))))..))))))))...	57	66.2	-28.3	133.5	149.5	46.5	121.294	126.462	62.073	middle
32	21	mmu-miR-5119_L+2R-1	CTCATCTCATCCTGGGGCTG	20	chr3	-	52777237	52777362	gctccagaccatgtccctctgtgtagaactgcgcttagcctatgtgaactgtgaggatccccggatggCTCATCTCATCCTCGGGCTGgcacaaggcagcaccagtgacacggtgacatgtggcaa	1	mmu-mir-5119,	mmu-mir-5119	cagggctggcctatgggacagatactataagtCATCTCATCCTGGGGCTGGgtctgc	mmu-miR-5119	CATCTCATCCTGGGGCTGG	3'	Diff	gp2b	...(((...((((((...((((((...((((.(((..((((.((((.....(((((((....(((((...))))).)))))))......)))))))))))..)))).)))))).)))))))))...	120	57.1	-41.3	133.5	149.5	46.5	121.294	126.462	62.073	middle
33	22	mmu-miR-5119_L+1R-1	TCATCTCATCCTGGGGCTG	19	chr12	-	130589474	130589515	gcaggactggaagccatagcctTCATCTCGTCCTGGGGCTGa	1	mmu-mir-5119,	mmu-mir-5119	cagggctggcctatgggacagatactataagtCATCTCATCCTGGGGCTGGgtctgc	mmu-miR-5119	CATCTCATCCTGGGGCTGG	3'	Diff	gp2b	.((((((((((.((....)).))))....)))))).......	34	59.5	-12	37	77	13	33.617	65.1342	17.3537	middle
34	23	mmu-miR-5119_1ss19GA	CATCTCATCCTGGGGCTGA	19	chr13	+	36573653	36573708	ttagacctgattattacatttcctgtaatatgatgccCATGTCATCCTGGGGCTGA	1	mmu-mir-5119,	mmu-mir-5119	cagggctggcctatgggacagatactataagtCATCTCATCCTGGGGCTGGgtctgc	mmu-miR-5119	CATCTCATCCTGGGGCTGG	3'	Diff	gp2b	...........(((((((.....)))))))....((((...........))))...	19	41.1	-9.9	0	12.5	0	0	10.5737	0	middle
35	24	mmu-miR-5119_1ss5TA	CATCACATCCTGGGGCTGG	19	chr5	+	132774770	132774795	atggctcCATCACATCCTGGGGCTTG	1	mmu-mir-5119,	mmu-mir-5119	cagggctggcctatgggacagatactataagtCATCTCATCCTGGGGCTGGgtctgc	mmu-miR-5119	CATCTCATCCTGGGGCTGG	3'	Diff	gp2b	..(((((((........)))))))..	22	57.7	-9.2	0	0	4	0	0	5.33961	low
36	25	mmu-mir-5119-p3_1ss6TG	TCATCGCATCCTGGGGCTG	19	chr7	-	45194958	45195006	ctggcttccctcactgccctatgTCATCGCATCCTGTGGCTGgagcacc	1	mmu-mir-5119,	mmu-mir-5119	cagggctggcctatgggacagatactataagtCATCTCATCCTGGGGCTGGgtctgc	mmu-mir-5119-p3	tCATCTCATCCTGGGGCTG	3'	New	gp2b	...(((((..((((......((((....))))...))))..)))))...	43	61.2	-10.3	81	246	27	73.5941	208.091	36.0424	middle
37	26	mmu-miR-5124a_L-1_1ss5CA	GTCAAGTGACTAAGAGCAT	19	chr1	+	221322155	221322200	ggGTGAAGTGACTAAGAGCATtaagtctcaaatgttgggtcacctg	1	mmu-mir-5124a,	mmu-mir-5124a	tagaaaggtgGGTCCAGTGACTAAGAGCATttgagcacttgttcttgcagaggacccaagttcaatttctag	mmu-miR-5124a	GGTCCAGTGACTAAGAGCAT	5'	Diff	gp2b	((((((...(((...((((.....).)))....)))...)))))).	45	45.7	-11.5	1909.5	2541.5	1110.5	1734.91	2149.85	1482.41	high
38	27	mmu-miR-5124a_R-2_1ss5CA	GGTCAAGTGACTAAGAGC	18	chr2	-	169218209	169218258	aagagcaaagggacagaaaattgagggtttGTTCAAGTGACTAAGAGCaa	1	mmu-mir-5124a,	mmu-mir-5124a	tagaaaggtgGGTCCAGTGACTAAGAGCATttgagcacttgttcttgcagaggacccaagttcaatttctag	mmu-miR-5124a	GGTCCAGTGACTAAGAGCAT	3'	Diff	gp2b	...((((...(((((((..........)))))))...)).))........	39	40	-6.7	63.5	119.5	62.5	57.6941	101.085	83.4315	middle
39	28	mmu-mir-6236-p5_1ss4CG_2	AATGAACTAGCCCTGAAAAT	20	chr4	-	69430945	69431006	acaactcacctgccgAATCAACTAGCCCTGAAAATGGATGGCGCTGgagcgttgggaggcta	1	mmu-mir-6236,	mmu-mir-6236	acaactcacctgccgaatcaactagccctgaaaatggatggcgctggagcgtggggaccatacccaGCCGTCGCCGGCAGTCAGGggtgggggtgggggtggagaaagaaaaaaaatcaataa	mmu-mir-6236-p5	aatcaactagccctgaaaat	5'	New	gp2b	........(((.((((.....(((((((...........)).)))))....)))).)))...	51	54.8	-17.8	5	2.5	6.5	4.54284	2.11475	8.67687	low
39	29	mmu-mir-6236-p3_1ss4TC	CCCCGAAAATGGATGGCGCTG	21	chr4	-	69430945	69431006	acaactcacctgccgAATCAACTAGCCCTGAAAATGGATGGCGCTGgagcgttgggaggcta	1	mmu-mir-6236,	mmu-mir-6236	acaactcacctgccgaatcaactagccctgaaaatggatggcgctggagcgtggggaccatacccaGCCGTCGCCGGCAGTCAGGggtgggggtgggggtggagaaagaaaaaaaatcaataa	mmu-mir-6236-p3	ccctgaaaatggatggcgctg	3'	New	gp2b	........(((.((((.....(((((((...........)).)))))....)))).)))...	51	54.8	-17.8	24.5	6.5	11.5	22.2599	5.49834	15.3514	middle
40	28	mmu-mir-6236-p5_1ss4CG_2	AATGAACTAGCCCTGAAAAT	20	chr14	-	23517806	23517930	ggagtgtgtaacaactcacctgccaAATCAACTAGCCCTGAAAATggatgggcattgggcccataccaagctgttgctggcagtcaagaggggacagggggatggcagcagtgggggcacgcaca	1	mmu-mir-6236,	mmu-mir-6236	acaactcacctgccgaatcaactagccctgaaaatggatggcgctggagcgtggggaccatacccaGCCGTCGCCGGCAGTCAGGggtgggggtgggggtggagaaagaaaaaaaatcaataa	mmu-mir-6236-p5	aatcaactagccctgaaaat	5'	New	gp2b	...((((((.....(((((((((((..((..((..((((.....(((((((((.....)))))).))).(((((.....))))).....))))..))..)).))))))..)))))...)))))).	121	56.8	-49.4	5	2.5	6.5	4.54284	2.11475	8.67687	low
41	30	mmu-mir-6236-p5_1ss4CG_1	AATGAACTAGCCCTGAAAA	19	X	-	139513421	139513453	AATGAACTAGACCTGAAAAataatatggtttac	1	mmu-mir-6236,	mmu-mir-6236	acaactcacctgccgaatcaactagccctgaaaatggatggcgctggagcgtggggaccatacccaGCCGTCGCCGGCAGTCAGGggtgggggtgggggtggagaaagaaaaaaaatcaataa	mmu-mir-6236-p5	aatcaactagccctgaaaa	5'	New	gp2b	.......((((((.............)))))).	25	27.3	-4.1	5	2.5	6.5	4.54284	2.11475	8.67687	low
42	30	mmu-mir-6236-p5_1ss4CG_1	AATGAACTAGCCCTGAAAA	19	chr5	+	102273667	102273717	tcataaAATGAACTTGCCCTGAAAAacactactaaagggtacattttagcc	1	mmu-mir-6236,	mmu-mir-6236	acaactcacctgccgaatcaactagccctgaaaatggatggcgctggagcgtggggaccatacccaGCCGTCGCCGGCAGTCAGGggtgggggtgggggtggagaaagaaaaaaaatcaataa	mmu-mir-6236-p5	aatcaactagccctgaaaa	5'	New	gp2b	...(((((((....((((((...............)))))))))))))...	45	35.3	-10.1	5	2.5	6.5	4.54284	2.11475	8.67687	low
43	31	mmu-mir-6236-p5_1ss3CG	ATGAACTAGCCCTGAAAAT	19	chr13	-	92105420	92105524	caaaagttgaactaaattacacATGAACTAGTCCTGAAAATattcggtaaatatcaaatgaaagtgtgaaagttaaagatttcatttgttaatagttaatttgca	1	mmu-mir-6236,	mmu-mir-6236	acaactcacctgccgaatcaactagccctgaaaatggatggcgctggagcgtggggaccatacccaGCCGTCGCCGGCAGTCAGGggtgggggtgggggtggagaaagaaaaaaaatcaataa	mmu-mir-6236-p5	atcaactagccctgaaaat	5'	New	gp2b	...(((((((.(((....(((.(((((......(((((....)))))......(((.((....)).)))...........))))).)))...))))))))))...	99	25.7	-14	13.5	7.5	8	12.2657	6.34424	10.6792	middle
44	32	mmu-mir-6236-p3_1ss3CG	ATGAACTAGCCCTGAAAAT	19	chr14	-	94328171	94328216	gaagctgggagattacttATGAACTAGCCTTGAAAATtccagcaca	1	mmu-mir-6236,	mmu-mir-6236	acaactcacctgccgaatcaactagccctgaaaatggatggcgctggagcgtggggaccatacccaGCCGTCGCCGGCAGTCAGGggtgggggtgggggtggagaaagaaaaaaaatcaataa	mmu-mir-6236-p3	atcaactagccctgaaaat	3'	New	gp2b	...(((((((..........................)))))))...	40	41.3	-9	13.5	7.5	8	12.2657	6.34424	10.6792	middle
45	33	mmu-mir-6236-p3_2	ACAACTCACCTGCCGAAT	18	chr19	+	35575614	35575729	accccagaaaaggtgttggttgatatagacagcaggacggtggccatggaagtcagaatccactaaggagtgtgtaACAACTCACCTGCCGAATcaactagccctgaaaatggatg	1	mmu-mir-6236,	mmu-mir-6236	acaactcacctgccgaatcaactagccctgaaaatggatggcgctggagcgtggggaccatacccaGCCGTCGCCGGCAGTCAGGggtgggggtgggggtggagaaagaaaaaaaatcaataa	mmu-mir-6236-p3	acaactcacctgccgaat	3'	New	gp2b	...(((....(((.((((((((((.......(((((..(((((...((.....))....)))))...((((........)))).)))))...))))))))))))).....)))...	110	48.3	-36.4	86.5	2.5	8.5	78.5912	2.11475	11.3467	middle
46	33	mmu-mir-6236-p3_2	ACAACTCACCTGCCGAAT	18	chr21	+	8215823	8215941	aaaaggtgttggttgatatagacagcaggacggtggccatggaagtcggaatccgctaaggagtgtgtaACAACTCACCTGCCGAATcaactagccctgaaaatggatggcgctggagc	1	mmu-mir-6236,	mmu-mir-6236	acaactcacctgccgaatcaactagccctgaaaatggatggcgctggagcgtggggaccatacccaGCCGTCGCCGGCAGTCAGGggtgggggtgggggtggagaaagaaaaaaaatcaataa	mmu-mir-6236-p3	acaactcacctgccgaat	3'	New	gp2b	...(((.((((((((((.......(((((..(((((((.........))...)))))...((((........)))).)))))...)))))))))))))...........((......))	95	51.3	-31.8	86.5	2.5	8.5	78.5912	2.11475	11.3467	middle
47	34	mmu-mir-6236-p5_1ss2CG	TGAACTAGCCCTGAAAATG	19	chr2	-	105895853	105895895	TGAACTAGCACTGAAAATGatttggaaacattggtttcagcca	1	mmu-mir-6236,	mmu-mir-6236	acaactcacctgccgaatcaactagccctgaaaatggatggcgctggagcgtggggaccatacccaGCCGTCGCCGGCAGTCAGGggtgggggtgggggtggagaaagaaaaaaaatcaataa	mmu-mir-6236-p5	tcaactagccctgaaaatg	5'	New	gp2b	..........((((((......((....))....))))))...	30	37.2	-8.3	13.5	8.5	0	12.2657	7.19014	0	middle
48	34	mmu-mir-6236-p5_1ss2CG	TGAACTAGCCCTGAAAATG	19	chr3	-	150378780	150378848	ggctccaagtcTGAACTAGACCTGAAAATGttggtgcttttctctgcgttttgttcctggactggaaag	1	mmu-mir-6236,	mmu-mir-6236	acaactcacctgccgaatcaactagccctgaaaatggatggcgctggagcgtggggaccatacccaGCCGTCGCCGGCAGTCAGGggtgggggtgggggtggagaaagaaaaaaaatcaataa	mmu-mir-6236-p5	tcaactagccctgaaaatg	5'	New	gp2b	...(((.(((((((((.((((..(((((.((....))))))).....)))).))))..))))))))...	63	46.4	-16.6	13.5	8.5	0	12.2657	7.19014	0	middle
49	35	mmu-mir-6236-p3_3	CAACTCACCTGCCGAATCAAC	21	chr21	+	8260042	8260171	cagaccccagaaaaggtgttggttgatatagacagcaggacggtggccatggaagtcggaatccgctaaggagtgtgtaaCAACTCACCTGCCGAATCAACtagccctgaaaatggatggcgctggagcg	1	mmu-mir-6236,	mmu-mir-6236	acaactcacctgccgaatcaactagccctgaaaatggatggcgctggagcgtggggaccatacccaGCCGTCGCCGGCAGTCAGGggtgggggtgggggtggagaaagaaaaaaaatcaataa	mmu-mir-6236-p3	caactcacctgccgaatcaac	3'	New	gp2b	(((.(((((....(((.((((((((((.......(((((..(((((((.........))...)))))...((((........)))).)))))...))))))))))))).....)))..))..))).....	125	53.1	-38.7	86.5	2.5	8.5	78.5912	2.11475	11.3467	middle
50	36	mmu-mir-6236-p3_1	AACTCACCTGCCGAATCAAC	20	chr21	+	8398850	8398981	accccagaaaaggtgttggttgatatagacagcaggacggtggccatggaagtcggaatccgctaaggagtgtgtaacAACTCACCTGCCGAATCAACtagccctgaaaatggatggcgctggagcgtcggg	1	mmu-mir-6236,	mmu-mir-6236	acaactcacctgccgaatcaactagccctgaaaatggatggcgctggagcgtggggaccatacccaGCCGTCGCCGGCAGTCAGGggtgggggtgggggtggagaaagaaaaaaaatcaataa	mmu-mir-6236-p3	aactcacctgccgaatcaac	3'	New	gp2b	...(((....(((.((((((((((.......(((((..(((((((.........))...)))))...((((........)))).)))))...))))))))))))).....)))..(((((....)))))...	110	53.8	-43.4	86.5	2.5	8.5	78.5912	2.11475	11.3467	middle
51	36	mmu-mir-6236-p3_1	AACTCACCTGCCGAATCAAC	20	chr21	+	8443079	8443210	accccagaaaaggtgttggttgatatagacagcaggacggtggccatggaagtcggaatccgctaaggagtgtgtaacAACTCACCTGCCGAATCAACtagccctgaaaatggatggcgctggagcgtcggg	1	mmu-mir-6236,	mmu-mir-6236	acaactcacctgccgaatcaactagccctgaaaatggatggcgctggagcgtggggaccatacccaGCCGTCGCCGGCAGTCAGGggtgggggtgggggtggagaaagaaaaaaaatcaataa	mmu-mir-6236-p3	aactcacctgccgaatcaac	3'	New	gp2b	...(((....(((.((((((((((.......(((((..(((((((.........))...)))))...((((........)))).)))))...))))))))))))).....)))..(((((....)))))...	110	53.8	-43.4	86.5	2.5	8.5	78.5912	2.11475	11.3467	middle
52	37	mmu-mir-6236-p3_1ss18CG	CAACTCACCTGCCGAATGAACTA	23	chr8	-	108292341	108292387	gaaattcgctaaggagtgtcaaaCAACTCACCTGCCGAATCAACTAg	1	mmu-mir-6236,	mmu-mir-6236	acaactcacctgccgaatcaactagccctgaaaatggatggcgctggagcgtggggaccatacccaGCCGTCGCCGGCAGTCAGGggtgggggtgggggtggagaaagaaaaaaaatcaataa	mmu-mir-6236-p3	caactcacctgccgaatcaacta	3'	New	gp2b	...((((((....((((........))))....).))))).......	37	44.7	-8.6	10.5	5.5	0	9.53997	4.65244	0	low
53	38	mmu-mir-6240-p5_1ss19GT_3	TCTGCCCAGTGCTCTGAATGTCA	23	chr1	+	237603037	237603112	gatgtgattTCTGCCCAGTGCTCTGAATGTCAaagtgaagaaattcaatgaaggacgggtaaacggcgggagtaac	1	mmu-mir-6240,	mmu-mir-6240	ttgagaaaaacaaaaccaaaaaaccCCAAAGCATCGCGAAGGCCCACGGCGggtgttgactcgatgtgatttctgcccagtgctctgaaggtcaatgtgaagaaatgtgactctctt	mmu-mir-6240-p5	tctgcccagtgctctgaaggtca	5'	New	gp2b	......(((((((((...(((((.....(((....((((....))))......))))))))...)))))))))...	67	46.1	-22.6	125.5	60.5	61.5	114.025	51.1769	82.0966	middle
54	38	mmu-mir-6240-p5_1ss19GT_3	TCTGCCCAGTGCTCTGAATGTCA	23	chr21	+	8444802	8444903	cgaaggcccgcggcgggtgttgacgcgatgtgattTCTGCCCAGTGCTCTGAATGTCAaagtgaagaaattcaatgaagcgcgggtaaacggcgggagtaac	1	mmu-mir-6240,	mmu-mir-6240	ttgagaaaaacaaaaccaaaaaaccCCAAAGCATCGCGAAGGCCCACGGCGggtgttgactcgatgtgatttctgcccagtgctctgaaggtcaatgtgaagaaatgtgactctctt	mmu-mir-6240-p5	tctgcccagtgctctgaaggtca	5'	New	gp2b	......(((((.(((........)))...........(((((.(((((((((((.((........)).)))))..).))))))))))....)))))......	50	54.9	-32.1	125.5	60.5	61.5	114.025	51.1769	82.0966	middle
55	39	mmu-mir-6240-p5_1ss24GT	TGATTTCTGCCCAGTGCTCTGAAT	24	chr11	+	77886458	77886536	catgTGATTTCTGCCCAGTGCTCTGAATgtcaaagtgaagaaattcaatgaagcacgggtaaacggcgggagtaactat	1	mmu-mir-6240,	mmu-mir-6240	ttgagaaaaacaaaaccaaaaaaccCCAAAGCATCGCGAAGGCCCACGGCGggtgttgactcgatgtgatttctgcccagtgctctgaaggtcaatgtgaagaaatgtgactctctt	mmu-mir-6240-p5	tgatttctgcccagtgctctgaag	5'	New	gp2b	...((.(((((((((...(((((((....(((...((((....)))).)))..)).)))))...))))))))).))...	73	44.3	-24.4	69.5	50	26.5	63.1455	42.295	35.3749	middle
56	39	mmu-mir-6240-p5_1ss24GT	TGATTTCTGCCCAGTGCTCTGAAT	24	chr7	+	69062428	69062502	atgTGATTTCTGCCCAGTGCTCTGAATgtcaaactgaagaaattcagtgaaatgcgggtaaacggcgggagtaac	1	mmu-mir-6240,	mmu-mir-6240	ttgagaaaaacaaaaccaaaaaaccCCAAAGCATCGCGAAGGCCCACGGCGggtgttgactcgatgtgatttctgcccagtgctctgaaggtcaatgtgaagaaatgtgactctctt	mmu-mir-6240-p5	tgatttctgcccagtgctctgaag	5'	New	gp2b	.....(((((((((...(((.(((....((..((((((....))))))))....))))))...)))))))))...	67	45.3	-26	69.5	50	26.5	63.1455	42.295	35.3749	middle
57	40	mmu-mir-6240-p5_1ss2GA_2	CAATGTGATTTCTGCCCAGTGCTCT	25	chr11	-	111821970	111822035	CAGTGTGATTTCTGCCCAGTGCTCTgaatgtcaaagtgaagaaattcagagaagcctgggtagccg	1	mmu-mir-6240,	mmu-mir-6240	ttgagaaaaacaaaaccaaaaaaccCCAAAGCATCGCGAAGGCCCACGGCGggtgttgactcgatgtgatttctgcccagtgctctgaaggtcaatgtgaagaaatgtgactctctt	mmu-mir-6240-p5	cgatgtgatttctgcccagtgctct	5'	New	gp2b	...........((((((((..((((((((.((........)).))))))))....))))))))...	52	48.5	-24.7	24.5	15	12.5	22.2599	12.6885	16.6863	middle
58	40	mmu-mir-6240-p5_1ss2GA_2	CAATGTGATTTCTGCCCAGTGCTCT	25	chr8	-	69690334	69690410	CGATGTGATTTCTGCCCAGTGCTCTgaatgtcaaattgaagaaattcaatgaagcacaggtaaatggtgggagtaac	1	mmu-mir-6240,	mmu-mir-6240	ttgagaaaaacaaaaccaaaaaaccCCAAAGCATCGCGAAGGCCCACGGCGggtgttgactcgatgtgatttctgcccagtgctctgaaggtcaatgtgaagaaatgtgactctctt	mmu-mir-6240-p5	cgatgtgatttctgcccagtgctct	5'	New	gp2b	.......(((((..((...(((.(((..(((...((((((....))))))...)))))))))...))..)))))...	67	41.6	-22.6	24.5	15	12.5	22.2599	12.6885	16.6863	middle
59	41	mmu-mir-6240-p5_1ss1GA	AATGTGATTTCTGCCCAGTGCTCTGA	26	chr2	-	132279925	132280005	cAAAGTGATTTCTGCCCAGTGCTCTGAatgtcaaaatgaagaaattcaatgaagtatgggtaaatggcggaagtaactatg	1	mmu-mir-6240,	mmu-mir-6240	ttgagaaaaacaaaaccaaaaaaccCCAAAGCATCGCGAAGGCCCACGGCGggtgttgactcgatgtgatttctgcccagtgctctgaaggtcaatgtgaagaaatgtgactctctt	mmu-mir-6240-p5	gatgtgatttctgcccagtgctctga	5'	New	gp2b	...(((.(((((((((...(((((......(((...((((....)))).))).....)))))...))))))))).)))...	75	38.3	-25.4	9	0	4.5	8.17712	0	6.00707	low
60	42	mmu-mir-6240-p5_1ss19GT_2	TCTGCCCAGTGCTCTGAATGTC	22	chr21	+	8217532	8217633	cgaaggcccgcggcgggtgttgacgcgatgtgattTCTGCCCAGTGCTCTGAATGTCaaagtgaagaaattcaatgaagcgcgggtaaacggcgggagtaac	1	mmu-mir-6240,	mmu-mir-6240	ttgagaaaaacaaaaccaaaaaaccCCAAAGCATCGCGAAGGCCCACGGCGggtgttgactcgatgtgatttctgcccagtgctctgaaggtcaatgtgaagaaatgtgactctctt	mmu-mir-6240-p5	tctgcccagtgctctgaaggtc	5'	New	gp2b	......(((((.(((........)))...........(((((.(((((((((((.((........)).)))))..).))))))))))....)))))......	50	54.9	-32.1	125.5	60.5	61.5	114.025	51.1769	82.0966	middle
61	43	mmu-mir-6240-p5_1ss19GT_1	TCTGCCCAGTGCTCTGAATG	20	chr21	+	8400586	8400658	gtgttgacgcgatgtgattTCTGCCCAGTGCTCTGAATGtcaaagtgaagaaattcaatgaagcgcgggtaaa	1	mmu-mir-6240,	mmu-mir-6240	ttgagaaaaacaaaaccaaaaaaccCCAAAGCATCGCGAAGGCCCACGGCGggtgttgactcgatgtgatttctgcccagtgctctgaaggtcaatgtgaagaaatgtgactctctt	mmu-mir-6240-p5	tctgcccagtgctctgaagg	5'	New	gp2b	(((....)))...........(((((.(((((((((((.((........)).)))))..).))))))))))..	50	45.2	-18.9	125.5	60.5	61.5	114.025	51.1769	82.0966	middle
62	44	mmu-mir-6240-p5_1ss2GA_1	CAATGTGATTTCTGCCCAG	19	chr3	+	182987942	182987962	CAATGTGATTTCTGCACAGgg	1	mmu-mir-6240,	mmu-mir-6240	ttgagaaaaacaaaaccaaaaaaccCCAAAGCATCGCGAAGGCCCACGGCGggtgttgactcgatgtgatttctgcccagtgctctgaaggtcaatgtgaagaaatgtgactctctt	mmu-mir-6240-p5	cgatgtgatttctgcccag	5'	New	gp2b	...((((.......))))...	15	47.6	-2.1	24.5	15	12.5	22.2599	12.6885	16.6863	middle
63	45	mmu-mir-6240-p3_1ss2GA	CAATGTGATTTCTGCCCA	18	chr7	-	138881957	138882014	ttctctcgtgctcctatgctctgacccatctagcatagcCAATGTGATTTCTTCCCAg	1	mmu-mir-6240,	mmu-mir-6240	ttgagaaaaacaaaaccaaaaaaccCCAAAGCATCGCGAAGGCCCACGGCGggtgttgactcgatgtgatttctgcccagtgctctgaaggtcaatgtgaagaaatgtgactctctt	mmu-mir-6240-p3	cgatgtgatttctgccca	3'	New	gp2b	...((.(((....(((((((..((....)).)))))))...))).))...........	44	48.3	-10.4	38	13.5	0	34.5256	11.4196	0	middle
64	46	eca-mir-9056-p5_1ss5AC	CTGCCGTGGGCGTTGGAA	18	chr20	-	63100051	63100105	cccCTGCCGTGGGCGTTGGAGgtgccattctcggctgcccccagccctgcagatg	1	eca-mir-9056,	eca-mir-9056	agcggcgccggcctagtccgcgcgagagcggctgcTGGGGCCGAGGCCCGGAGGACTGGCcttggagcatcttctggcccttcgctggctcctcgagctcgggctcctctctgcagtgggcgttggaagtctgca	eca-mir-9056-p5	ctgcagtgggcgttggaa	5'	New	gp2b	...((((...(((.(((((.((((((......))).))).))))))))))))...	49	70.9	-24.7	32	29	28	29.0742	24.5311	37.3773	middle
65	47	pal-miR-9993a-3p_1ss11GA	ATCTCGGTGGAACCTCCA	18	chr1	-	179095401	179095429	agttcctatctATCTCGGTGGGACCTCCA	2	pal-mir-9993a,pal-mir-9995,	pal-mir-9993a	TGGGTCTCAGAGAAAActccccttctctctctggggaagATCTCGGTGGGACCTCCA	pal-miR-9993a-3p	ATCTCGGTGGGACCTCCA	3'	Diff	gp2b	((.(((((((......))))))).))...	26	51.7	-8.3	6	21	0	5.45141	17.7639	0	middle
66	48	bta-miR-11987_L-2R-1_1ss8TA	AGGAAACTCTGGTGGAGG	18	chr1	+	120789144	120789187	tgggcagggcaaagccagAGGAAACTCTGGTGGAGGtccgtagc	1	bta-mir-11987,	bta-mir-11987	CGAGGAATCTCTGGTGGAGGTatatgtcagcagtggccctgcagggttggggccactgagtgcagcagtgcctgcatgggaccttttg	bta-miR-11987	CGAGGAATCTCTGGTGGAGGT	3'	Diff	gp2b	...((.((((...(((((((....)))))))....))))))...	38	61.4	-22.1	21	27	7.5	19.0799	22.8393	10.0118	middle
67	48	bta-miR-11987_L-2R-1_1ss8TA	AGGAAACTCTGGTGGAGG	18	chr21	+	8442697	8442723	gaagccagAGGAAACTCTGGTGGAGGt	1	bta-mir-11987,	bta-mir-11987	CGAGGAATCTCTGGTGGAGGTatatgtcagcagtggccctgcagggttggggccactgagtgcagcagtgcctgcatgggaccttttg	bta-miR-11987	CGAGGAATCTCTGGTGGAGGT	3'	Diff	gp2b	...(((((((....)))))))......	18	55.6	-14.5	21	27	7.5	19.0799	22.8393	10.0118	middle
68	49	bta-miR-11987_L-3_1ss8TA	GGAAACTCTGGTGGAGGT	18	chr1	+	149459497	149459523	aaagccagaGGAAACTCTGGTGGAGGT	1	bta-mir-11987,	bta-mir-11987	CGAGGAATCTCTGGTGGAGGTatatgtcagcagtggccctgcagggttggggccactgagtgcagcagtgcctgcatgggaccttttg	bta-miR-11987	CGAGGAATCTCTGGTGGAGGT	3'	Diff	gp2b	...(((((((....)))))))......	18	51.9	-14.5	3.5	7.5	2.5	3.17999	6.34424	3.33726	low
69	49	bta-miR-11987_L-3_1ss8TA	GGAAACTCTGGTGGAGGT	18	chr21	+	8215434	8215460	gaagccagaGGAAACTCTGGTGGAGGT	1	bta-mir-11987,	bta-mir-11987	CGAGGAATCTCTGGTGGAGGTatatgtcagcagtggccctgcagggttggggccactgagtgcagcagtgcctgcatgggaccttttg	bta-miR-11987	CGAGGAATCTCTGGTGGAGGT	3'	Diff	gp2b	...(((((((....)))))))......	18	55.6	-14.5	3.5	7.5	2.5	3.17999	6.34424	3.33726	low
70	50	bta-miR-11987_L-1_1ss8TA	GAGGAAACTCTGGTGGAGGT	20	chr21	+	8259663	8259689	gaagccaGAGGAAACTCTGGTGGAGGT	1	bta-mir-11987,	bta-mir-11987	CGAGGAATCTCTGGTGGAGGTatatgtcagcagtggccctgcagggttggggccactgagtgcagcagtgcctgcatgggaccttttg	bta-miR-11987	CGAGGAATCTCTGGTGGAGGT	3'	Diff	gp2b	...(((((((....)))))))......	18	55.6	-14.5	3.5	2.5	0	3.17999	2.11475	0	low
71	51	bta-miR-11987_L-2_1ss8TA	AGGAAACTCTGGTGGAGGT	19	chr21	+	8398468	8398494	gaagccagAGGAAACTCTGGTGGAGGT	1	bta-mir-11987,	bta-mir-11987	CGAGGAATCTCTGGTGGAGGTatatgtcagcagtggccctgcagggttggggccactgagtgcagcagtgcctgcatgggaccttttg	bta-miR-11987	CGAGGAATCTCTGGTGGAGGT	3'	Diff	gp2b	...(((((((....)))))))......	18	55.6	-14.5	14	18.5	12.5	12.72	15.6491	16.6863	middle
1	1	mdo-miR-26-5p_R+3	TTCAAGTAATCCAGGATAGGCTAG	24						1	mdo-mir-26-3,	mdo-mir-26-3	acctggTTCAAGTAATCCAGGATAGGCtggacccattctcatcggCCTATTCTCGACTACTTGCACTcgg	mdo-miR-26-5p	TTCAAGTAATCCAGGATAGGC	5'	Diff	gp3	.((..((.((((((.((.((((((((((((...........)))))))))))).)).)))))).))..))	69	51.4	-27.8	0	8	0	0	6.76719	0	low
2	2	mmu-miR-101c_R+2	ACAGTACTGTGATAACTGACC	21						1	mmu-mir-101c,	mmu-mir-101c	tgatgccctactgcacagtcctgtgatgactgactgctcaactgcACAGTACTGTGATAACTGAtcgcctaactg	mmu-miR-101c	ACAGTACTGTGATAACTGA	3'	Diff	gp3	.(((.........((((((.(((((.....(((....)))....))))).)))))).......))).........	43	49.3	-16.3	0	5	0	0	4.2295	0	low
3	3	sha-miR-125a_L-1R+2	CCCTGAGACCCTAACTTGTGAAA	23						1	sha-mir-125b,	sha-mir-125b	tccaaaatatccgtactatagaagaaagaattctactgcatcaaataagacttttcctagTCCCTGAGACCCTAACTTGTGAgattttttagcaataatcACAGGTCAGGCTCTTGGGACCtaggcggaggggaaccagcagctctggac	sha-miR-125a	TCCCTGAGACCCTAACTTGTGA	5'	Diff	gp3	((((..............(((((.......)))))((((............((..(((((..((..(((.(((.((((((((................)))))))).))).)))..))..)))))..))((....)).))))...)))).	78	44	-45.1	6	9	0	5.45141	7.61309	0	low
4	4	mmu-miR-146a-5p_R+2	TGAGAACTGAATTCCATGGGTTAA	24						3	mmu-mir-146a,rno-mir-146a,dno-mir-146a,	mmu-mir-146a	agctcTGAGAACTGAATTCCATGGGTTatatcaatgtcagaCCTGTGAAATTCAGTTCTTCAGct	mmu-miR-146a-5p	TGAGAACTGAATTCCATGGGTT	5'	Diff	gp3	((((..((((((((((((.((..((((............))))..)).)))))))))))).))))	65	40	-26.5	35	29	27	31.7999	24.5311	36.0424	middle
5	5	mdo-miR-203_1ss11TC	GTGAAATGTTCAGGACCACTTG	22						1	mdo-mir-203,	mdo-mir-203	agctgccctggtccagtggttcttaacagttcaacagttctgtgtagagattGTGAAATGTTTAGGACCACTTGatctggg	mdo-miR-203	GTGAAATGTTTAGGACCACTTG	3'	Diff	gp3	.....(((.((((.(((((((((.((((.((((.(((((((....))).)))))))).)))).))))))))).)))).)))	76	45.7	-33.2	0	12	0	0	10.1508	0	middle
6	6	cgr-miR-300_1ss22CA	TATGCAAGGGCAAGCTCTCTTA	22						3	cgr-mir-300,mmu-mir-300,rno-mir-300,	cgr-mir-300	tatcgtttgctacttgaagagaggttatcctttgtgtgtttgctttacgcgaaatgaaTATGCAAGGGCAAGCTCTCTTCgaggagcaaa	cgr-miR-300	TATGCAAGGGCAAGCTCTCTTC	3'	Diff	gp3	.....((((((.(((((((((((.((..((((((..(((((..(((....)))..)))))..)))))).)).))))))))))).))))))	85	42.2	-39	5	0	0	4.54284	0	0	low
7	7	cgr-miR-322-5p_R+2	CAGCAGCAATTCATGTTTTGGAA	23						4	cgr-mir-322,mmu-mir-322,rno-mir-322-2,rno-mir-322-1,	cgr-mir-322	cgaagggatgCAGCAGCAATTCATGTTTTGGagtattgtaaaggttcaAAACATGAAGCGCTGCAACACcccttcgcg	cgr-miR-322-5p	CAGCAGCAATTCATGTTTTGG	5'	Diff	gp3	(((((((.((..(((((..(((((((((((((............)))))))))))))..)))))..)).)))))))..	76	47.4	-36.5	0	0	5	0	0	6.67452	low
7	8	cgr-miR-322-3p_L+1R-1	AAAACATGAAGCGCTGCAACA	21						4	cgr-mir-322,mmu-mir-322,rno-mir-322-2,rno-mir-322-1,	cgr-mir-322	cgaagggatgCAGCAGCAATTCATGTTTTGGagtattgtaaaggttcaAAACATGAAGCGCTGCAACACcccttcgcg	cgr-miR-322-3p	AAACATGAAGCGCTGCAACAC	3'	Diff	gp3	(((((((.((..(((((..(((((((((((((............)))))))))))))..)))))..)).)))))))..	76	47.4	-36.5	5	14	0	4.54284	11.8426	0	middle
8	9	mmu-miR-351-5p_R+1	TCCCTGAGGAGCCCTTTGAGCCTGT	25						3	mmu-mir-351,rno-mir-351-1,rno-mir-351-2,	mmu-mir-351	catggcacctccgttTCCCTGAGGAGCCCTTTGAGCCTGgagtgaaaaaaaaaaacaGGTCAAGAGGCGCCTGGGAACtggagaagagtgttaaacttc	mmu-miR-351-5p	TCCCTGAGGAGCCCTTTGAGCCTG	5'	Diff	gp3	....((((((((..(((((..(((.(((..((((.((((................))))))))..))).))))))))..))))....))))........	87	50.5	-35.1	0	6	0	0	5.07539	0	low
9	10	mmu-miR-362-3p_1ss22AT	AACACACCTGTTCAAGGATTCT	22						3	cgr-mir-362,mmu-mir-362,rno-mir-362,	mmu-mir-362	ctcgAATCCTTGGAACCTAGGTGTGAATgctgcttcagtgcAACACACCTGTTCAAGGATTCAaa	mmu-miR-362-3p	AACACACCTGTTCAAGGATTCA	3'	Diff	gp3	..(((((.(((((((((((...((((((((.(..(((...)))..)..)))))))))))))))))))..)))))......	72	51.2	-37	0	6	0	0	5.07539	0	low
10	11	cfa-miR-429	TAATACTGTCTGGTAATGCCGT	22						13	cfa-mir-429,mmu-mir-429,bta-mir-429,chi-mir-429,eca-mir-429,mdo-mir-429,efu-mir-429,rno-mir-429,ssc-mir-429,cpo-mir-429,pal-mir-429,dno-mir-429,cgr-mir-429,	cfa-mir-429	agcctgctgatgggcgtcttaccagacacggttagatctgggttctggtgtcTAATACTGTCTGGTAATGCCGTtcatccatggc	cfa-miR-429	TAATACTGTCTGGTAATGCCGT	3'	Yes	gp3	.(((....((((..((..((((((((((..((((((((..(...)..).)))))))..))))))))))...))..))))...)))	84	51.8	-36.3	72	109	25	65.417	92.203	33.3726	middle
11	12	cgr-miR-450b-5p_R+1	TTTTGCAGTATGTTCCTGAATAC	23						2	cgr-mir-450b,mmu-mir-450b,	cgr-mir-450b	gcagaattatTTTTGCAGTATGTTCCTGAATAcataatataagcgTATTGGGAACATTTTGCATATGtaattttgt	cgr-miR-450b-5p	TTTTGCAGTATGTTCCTGAATA	5'	Diff	gp3	((((((((((...((((..((((((((.(((((...........)))))))))))))..))))...))))))))))	76	28.9	-26.6	6	0	0	5.45141	0	0	low
12	13	mmu-miR-466i-5p_R+4_1ss12GT	TGTGTGTGTGTTTGTGTGTGTGTG	24						1	mmu-mir-466q,	mmu-mir-466q	gTGTGTGTGTGTGTGTGTGTGtgtgtgtatgtgtgtgtagtatatGTGCACACACACACATACGTacccatgcatg	mmu-miR-466i-5p	TGTGTGTGTGTGTGTGTGTG	5'	Diff	gp3	(((..((.((..(((((((((((((((((..((((.....))))..)))))))))))))))))..)).))..))).	75	46.1	-43.7	0	2.5	0	0	2.11475	0	low
13	13	mmu-miR-466i-5p_R+4_1ss12GT	TGTGTGTGTGTTTGTGTGTGTGTG	24						1	mmu-mir-466q,	mmu-mir-466q	gTGTGTGTGTGTGTGTGTGTGtgtgtgtatgtgtgtgtagtatatGTGCACACACACACATACGTacccatgcatg	mmu-miR-466i-5p	TGTGTGTGTGTGTGTGTGTG	5'	Diff	gp3	(((..((.((..(((((((((((((((((..((((.....))))..)))))))))))))))))..)).))..))).	75	46.1	-43.7	0	2.5	0	0	2.11475	0	low
14	14	cgr-miR-501-3p	AATGCACCCGGGCAAGGATTTGG	23						3	cgr-mir-501,mmu-mir-501,rno-mir-501,	cgr-mir-501	catcctctctAATCCTTTGTCCCTGGGTGGAAATGCtatttgtatgcAATGCACCCGGGCAAGGATTTGGagaaggtga	cgr-miR-501-3p	AATGCACCCGGGCAAGGATTTGG	3'	Yes	gp3	((((.(((((((..(((((.(((.(((((....(((.........)))...)))))))))))))..))))))).)))).	78	48.1	-34.3	8	8	0	7.26855	6.76719	0	low
15	15	cgr-miR-598_R-1	TACGTCATCGTCGTCATCGTTAT	23						4	cgr-mir-598,mmu-mir-598,rno-mir-598-1,rno-mir-598-2,	cgr-mir-598	gctgatgctggcggtgatgccgatggtgcgagctgaaaatgggctgcTACGTCATCGTCGTCATCGTTATCatcatcatc	cgr-miR-598	TACGTCATCGTCGTCATCGTTATC	3'	Diff	gp3	..(((((.(..((((((((.(((((((((.((((.......)))))).))..))))).))))))))..).))))).....	73	53.8	-31.1	6	0	0	5.45141	0	0	low
16	16	mmu-miR-676-3p_R+1	CCGTCCTGAGGTTGTTGAGCTG	22						1	mmu-mir-676,	mmu-mir-676	ctttgcctgaatgcatgACTCTACAACCTTAGGACTTGCagaattaaaggaatgCCGTCCTGAGGTTGTTGAGCTgtgcgtttctgggc	mmu-miR-676-3p	CCGTCCTGAGGTTGTTGAGCT	3'	Diff	gp3	....((((((((((((..(((.(((((((((((((..(((............))).))))))))))))).)))..))))))))..))))	85	48.3	-42.8	5	5	0	4.54284	4.2295	0	low
17	17	mmu-miR-700-3p	CACGCGGGAACCGAGTCCACC	21						1	mmu-mir-700,	mmu-mir-700	ttcactgggagTAAGGCTCCTTCCTGTGCTTGCaggggagaaatacgaactgCACGCGGGAACCGAGTCCACCcccagt	mmu-miR-700-3p	CACGCGGGAACCGAGTCCACC	3'	Yes	gp3	...((((((.((..(((((.((((((((..(((((..............)))))))))))))..))))).)).))))))	76	58.2	-32.7	0	6	0	0	5.07539	0	low
18	18	cgr-miR-872-5p	AAGGTTACTTGTTAGTTCAGG	21						7	cgr-mir-872,mmr-mir-872,mmu-mir-872,rno-mir-872,eca-mir-872,cpo-mir-872,ocu-mir-872,	cgr-mir-872	gacttgtcagAAGGTTACTTGTTAGTTCAGGacctcattactttctgccTGAACTATTGCAGTAGCCTCCtaactggtt	cgr-miR-872-5p	AAGGTTACTTGTTAGTTCAGG	5'	Yes	gp3	(((..((.((.(((((((.((((((((((((................)))))))))..)))))))))).)).))..)))	79	43	-26.8	3.5	0	0	3.17999	0	0	low
19	19	mmu-miR-1198-5p_R+1	TATGTGTTCCTGGCTGGCTTGGA	23						1	mmu-mir-1198,	mmu-mir-1198	ttttttttcttttgtttattttgtttgtgacagttgtctgtTATGTGTTCCTGGCTGGCTTGGtactcatgtgtagcccAAGCTAGCCTCTAACTCATGGCagtcatcctgtctcagtctc	mmu-miR-1198-5p	TATGTGTTCCTGGCTGGCTTGG	5'	Diff	gp3	........................(((.(((((.((.(((..(((.(((...((((((((((((((......)))..)))))))))))...))).)))..))).))..))))).)))....	93	42.1	-44.3	0	6	0	0	5.07539	0	low
20	20	cgr-miR-1260	ATCCCACCGCTGCCACCA	18						1	cgr-mir-1260,	cgr-mir-1260	acttgggaaATCCCACCGCTGCCACCAaataaagtgaaacacagtaaatggggatcgctatggagtcaaagcaagtttga	cgr-miR-1260	ATCCCACCGCTGCCACCA	5'	Yes	gp3	...((((....))))..(((.((.(((..((..(((...)))..))..)))))...(((.((....)).))).)))....	32	45	-14.5	9	10	0	8.17712	8.45899	0	low
21	21	mmu-miR-1948-3p_L-1R+1	TTAGGCAGAGCACTCGTACAGT	22						1	mmu-mir-1948,	mmu-mir-1948	attctcaccttactATATGAGTATTCTGCCTAAATgtggtgtacggatacaTTTAGGCAGAGCACTCGTACAGtaaggtgagaat	mmu-miR-1948-3p	TTTAGGCAGAGCACTCGTACAG	3'	Diff	gp3	((((((((((((((.(((((((..((((((((((((((.........))))))))))))))..))))))).))))))))))))))	85	40	-51.8	5	0	0	4.54284	0	0	low
22	22	bta-miR-2478_L-2	ATCCCACTTCTGACACCA	18						1	bta-mir-2478,	bta-mir-2478	gttgggggtcggtggtgagcaagcagagactacataggttgccttGTATCCCACTTCTGACACCAtgtattgtcaac	bta-miR-2478	GTATCCCACTTCTGACACCA	3'	Diff	gp3	..(((..(((((..(((.(((((....((((.....))))..)))))....)))..))))).)))............	63	50.6	-20.2	9	26	0	8.17712	21.9934	0	middle
23	23	mmu-miR-3068-5p_R-1	TTGGAGTTCATGCAAGTTCTAAC	23						3	cgr-mir-3068,mmu-mir-3068,rno-mir-3068,	mmu-mir-3068	gcgagagtaaTTGGAGTTCATGCAAGTTCTAACCagcttactcagtagctgGGTGAATTGCAGTACTCCAACAttctgc	mmu-miR-3068-5p	TTGGAGTTCATGCAAGTTCTAACC	5'	Diff	gp3	...(((((..(((((((...(((((.(((...((((((........))))))..))))))))..))))))).)))))..	74	43	-31.3	0	12	0	0	10.1508	0	middle
24	24	mmu-miR-5099_L+2R-1	TCTTAGATCGATGTGGTGCTC	21						1	mmu-mir-5099,	mmu-mir-5099	agaattcagttagaaattacattgatttaagaagtggtaatgggcTTAGATCGATGTGGTGCTCCtgagttctc	mmu-miR-5099	TTAGATCGATGTGGTGCTCC	3'	Diff	gp3	(((((((((...((.(..(((((((((((((..((....))...)))))))))))))..)..))))))))))).	73	37.8	-26.1	20	22	5	18.1714	18.6098	6.67452	middle
25	25	mmu-miR-5110_L-6R+2	GGTAGAGGGTGGTGGAATTTC	21						1	mmu-mir-5110,	mmu-mir-5110	agcGGAGGAGGTAGAGGGTGGTGGAATTtgatgtcatctctgccactactggacagggctacgttgttctagccacttgccctgagt	mmu-miR-5110	GGAGGAGGTAGAGGGTGGTGGAATT	5'	Diff	gp3	..(((((..((((((((.((..(........)..)))))))))).)).)))..((((((...((.((....)).))..))))))...	49	54	-29.2	177	361	95	160.817	305.37	126.816	middle
26	26	mmu-miR-5112_L+1R+1	GTAGCTCAGCGGGAGAGCACT	21						1	mmu-mir-5112,	mmu-mir-5112	ggctggggtgTAGCTCAGCGGGAGAGCACctgcttcatccccagctacatttccagtgcc	mmu-miR-5112	TAGCTCAGCGGGAGAGCAC	5'	Diff	gp3	(((.(..((((((((....((((((((....))))..)))).))))))))..)....)))	60	61.7	-25.7	0	14	0	0	11.8426	0	middle
27	27	mmu-miR-5119_L+1_1ss20GT	TCATCTCATCCTGGGGCTGT	20						1	mmu-mir-5119,	mmu-mir-5119	cagggctggcctatgggacagatactataagtCATCTCATCCTGGGGCTGGgtctgc	mmu-miR-5119	CATCTCATCCTGGGGCTGG	3'	Diff	gp3	(((..(..((((...(((.((((((.....)).))))..)))..))))..)..))).	56	56.1	-19.7	310	406	109	281.656	343.435	145.504	high
28	28	mmu-miR-5124a_L-1R-1_1ss5CA	GTCAAGTGACTAAGAGCA	18						1	mmu-mir-5124a,	mmu-mir-5124a	tagaaaggtgGGTCCAGTGACTAAGAGCATttgagcacttgttcttgcagaggacccaagttcaatttctag	mmu-miR-5124a	GGTCCAGTGACTAAGAGCAT	5'	Diff	gp3	((((((..(((((((..((..((((((((..........))))))))))..))))))).......)))))).	71	44.4	-24.1	1015	1425	603	922.197	1205.41	804.947	high
29	29	mmu-miR-8117_L-1R-1_1ss15GA	CTCGTGTGGAACAAAAGGG	19						1	mmu-mir-8117,	mmu-mir-8117	gggattcctgtgtgggcccttgcaggtgttgggcgagactccgctggcaaggtagcctgggGCTCGTGTGGAACAGAAGGGGcttgtgccccaggtcaggcccgggt	mmu-miR-8117	GCTCGTGTGGAACAGAAGGGG	3'	Diff	gp3	(((.((((.(..(((((((...(((((.....((.((......)).))......))))))))))))..))))).....(((((....)))))........)))....	69	66.4	-45.3	21	0	5	19.0799	0	6.67452	middle
30	30	bta-miR-11980_R-1_1ss4CG	AGGGAACGGGCTTGGCGGA	19						1	bta-mir-11980,	bta-mir-11980	AGGCAACGGGCTTGGCGGAGgcttgtcccgctcctccttagcccgttccctgagc	bta-miR-11980	AGGCAACGGGCTTGGCGGAG	5'	Diff	gp3	(((.((((((((.((.((((.(.......))))).))..)))))))).)))....	51	67.3	-26.3	0	7	0	0	5.92129	0	low
31	31	mmu-let-7c-5p_R+2	TGAGGTAGTAGGTTGTATGGTTAT	24						3	cgr-let-7c-2,mmu-let-7c-2,rno-let-7c-2,	mmu-let-7c-2	acggcctttggggTGAGGTAGTAGGTTGTATGGTTttgggctctgccccgctctgcggtaaCTATACAATCTACTGTCTTTCCtgaagtggccgc	mmu-let-7c-5p	TGAGGTAGTAGGTTGTATGGTT	5'	Diff	gp3	(((..((..((((((((((((((((..((((...))))(((...)))..))))))))))))))))..))..)))	74	50	-34.6	10	7.5	3	9.08569	6.34424	4.00471	low
32	31	mmu-let-7c-5p_R+2	TGAGGTAGTAGGTTGTATGGTTAT	24						2	mmu-let-7c-2,rno-let-7c-2,	mmu-let-7c-2	acggcctttggggTGAGGTAGTAGGTTGTATGGTTttgggctctgccccgctctgcggtaaCTATACAATCTACTGTCTTTCCtgaagtggccgc	mmu-let-7c-5p	TGAGGTAGTAGGTTGTATGGTT	5'	Diff	gp3	.((((((((..((..((..((((((((((((((((..((((...))))(((...)))..))))))))))))))))..))..))..))).))))).	93	53.7	-46.6	10	7.5	3	9.08569	6.34424	4.00471	low
33	32	mmu-let-7j_1ss8TG	TGAGGTAGTAGTTTGTGCTGTTAT	24						4	mmu-let-7j,mmu-mir-598,rno-mir-598-1,rno-mir-598-2,	mmu-let-7j	attggaggctatttctgatcatgataatttccTGAGGTATTAGTTTGTGCTGTTATatgaatcgaataatatcccttgctcagattaaaagcctggagttaaaaaaatcaagtgccttgaac	mmu-let-7j	TGAGGTATTAGTTTGTGCTGTTAT	5'	Diff	gp3	....(((((.(((..((((.....(((((((...((((.((((((((.((....((((..........)))).....)).))))))))..))))))))))).....))))))))))))....	114	34.4	-23.3	39	54	38	35.4342	45.6785	50.7263	middle
1	1	PC-5p-200452_6	TGTCTGTGTAGGATAGGTG	19	chr12	-	29924252	29924365	ctccttgttttgttttgttttgaatgTGTCTGTGTAAGATAGGTGctatgattttactgatcatagagaattgtatgtacttatagatagtatcattaaagatcaatcaaggta	0						5'	New	gp4	..(((((..(((.(((....(((...((((((((((..((((...((((((((.....))))))))....))))...)))..)))))))...)))....))).))).)))))..	110	29.8	-26.6	0	0	3	0	0	4.00471	low
2	1	PC-5p-200452_6	TGTCTGTGTAGGATAGGTG	19	chr7	-	37904164	37904252	gaatgtggttcccaagtcaTGTCAGTGTAGGATAGGTGtttgtgacacaaataactttccttcattattgaatactaaagaccataaaa	0						5'	New	gp4	...(((((((....(((....((((((.((((.((.((((((.....)))))).)).))))....))))))..)))...)))))))...	83	34.8	-21.2	0	0	3	0	0	4.00471	low
3	2	PC-5p-119399_14	AGATTTCCCAGAGCCTTGAG	20	chr12	-	112315122	112315192	tatgacAGACTTCCCAGAGCCTTGAGtcttggaaaccacaaggaattcaggtagcggtgagccctgttgca	0						5'	New	gp4	...(((((.((..((...((((.((((((((.......))))..))))))))...))..))..)))))...	65	50.7	-18.8	0	9	5	0	7.61309	6.67452	low
4	3	PC-3p-225483_6	CTGGCGGCGCCCTGGCCAC	19	chr8	+	103501118	103501193	actgccctgcggccgcctgcgcgccccagttcgccgccctccctcccgCTGGCGGCGCCCAGGCCACgagggctgc	0						3'	New	gp4	...(((((.((...(((((.((((((((((.................))))).))))).)))))..)))))))...	70	81.6	-38.5	0	6	0	0	5.07539	0	low
5	4	PC-5p-325592_5	ATTGAACTGCACTTTTCTGA	20	chr20	+	53164653	53164769	catggagttagtgactactatATTGAACTGCACTGTTCTGAaggattaaatgaaatactagccttctatagaagaaagcagttgaagtttgagacactgaagctttcgccttcctaa	0						5'	New	gp4	...(((.((((((.((......((.((((((....(((((((((.(((..........))))))))...))))....)))))).)).....)).)))))).((....))..)))...	111	37.6	-24.6	0	5	0	0	4.2295	0	low
6	5	PC-3p-42827_63	GTAGCTATGTTCGGAATAGA	20	chr2	+	185999662	185999751	taagatctgtcttggtgttttcaacatgtatctggtgaataatttatctttaataGTAGCTATGTTCAGAATAGAaggaaatggatcaag	0						3'	New	gp4	...(((((.((((..((((((.(((((((..(((..((........)).....)))..)).))))).))))))..))))...)))))...	84	31.1	-15.8	80	72	54	72.6855	60.9047	72.0848	middle
7	6	PC-3p-263116_5	TAGATTTGGATATTTGTTTC	20	chr3	+	101524580	101524657	agaaggaatagcatgttcagaaataaattatttatgacacttgttgatacagttTAGATTTGGATATTTGTTCCtacc	0						3'	New	gp4	...((((((((.(((((((((..((((((...((((((....))).))).))))))..)))))))))))))))))...	72	29.5	-18.8	5	0	0	4.54284	0	0	low
8	7	PC-5p-18428_157	AGGTGGGAGGCTTTGAAGT	19	chr11	-	58960712	58960811	gtgtgtgtgtgttggttggggcAGGTGGGAGGCTTTGGAGTttgcctgtagactgctatcatctctaggccttggtaagtccttgcaaagacacacagtt	0						5'	New	gp4	...(((((((.((.((..((((((((.(((((...(((((((((....)))))).)))...)))))..))))......))))..)).)).)))))))...	94	51	-33.8	42	105	10	38.1599	88.8194	13.349	middle
9	8	PC-5p-179655_7	GTATCTCTGGTGGATCTGT	19	chr1	-	115054425	115054525	ttttgtcagaatgcattatagGTATCTCTTGTGGATCTGTgtcctctaaactgtgaattcccagaaagcaggagaaaccatatcctattgtctctgcatct	0						5'	New	gp4	...((.((((..(((..((((((.((((((((...((((.....((........)).....))))..)))))))).))).))).....))).))))))...	95	39.6	-23.4	0	7	0	0	5.92129	0	low
10	9	PC-3p-285606_5	TTGCTGGTGGGGTTGCCTA	19	chr9	-	131809499	131809561	atcgctcccctcactgtagccaggtggagaatctcccttcagagTTGCTGGAGGGGTTGCCTA	0						3'	New	gp4	...((.((((((...(((((.(((.((((...)))))))....)))))..))))))..))...	57	57.1	-24.1	0	5	0	0	4.2295	0	low
11	10	PC-3p-283206_5	TGCTGTCCTGTGTGTTGGATT	21	chr13	+	96801912	96801985	cacaggaagatcaatagctcaggaatgtaaggactcaggttctgtttTGCTGTCCTGTGTGTTGGCTTcctcta	0						3'	New	gp4	...((((((.((((((.(.(((((..((((((((....)))))....)))..))))).)))))))))))))...	68	45.9	-25.5	0	5	0	0	4.2295	0	low
12	11	PC-3p-129183_12	GTAGGTAATCTTCAGGCT	18	chr6	-	47643528	47643653	tcagtggttagcagcacaaggtagggtccttcccaggctggcttgagttttccttttttccaccctttgatgaGAAGGTAATCTTCAGGCTggtttactggaaattctattggtggtaactgtgct	0						3'	New	gp4	...(..((((.((.((....((((..(..((.((((((..(((((((..(((((((((..((.....))..))))))).))..)))))))..))...)))))))..)))))).)).))))..)...	120	46	-37.9	0	22	0	0	18.6098	0	middle
13	12	PC-3p-133766_11	TCAGTAGCTCGAGGAAAAG	19	chr15	+	72680136	72680211	ttcccattcttacccagctggtggagtctacagcctatttcaggtttgaccTCAGTAGCTAGAGGAAAAGtggtta	0						3'	New	gp4	...(((((.((.((.((((..((..(((...(((((.....))))).)))..))..))))...)))).)))))...	70	46.1	-20.2	0	13	6	0	10.9967	8.00942	middle
14	13	PC-5p-64918_37	TATTGGACTTTGAACAGATC	20	chr17	+	36583923	36584000	TATTGGACTTTGAATAGATCttttactcatgcattgttttgtaacatcatgcattggaatttatttcaaagttcactg	0						5'	New	gp4	...((((((((((((((((......(..((((((((((....))))..))))))..).))))).)))))))))))...	72	29.5	-18.9	23	25	12	20.8971	21.1475	16.0188	middle
15	14	PC-5p-230232_6	AACATCTGCTGTTGCTGAGAA	21	chr16	-	53221206	53221273	cTACATCTGCTGTTGCTGAGAAttaagtgggataatgtatattggctcttagcacagtcttgatgcat	0						5'	New	gp4	...((((.((((.((((((((..(((...............)))..))))))))))))...))))...	62	39.7	-17.7	6	0	0	5.45141	0	0	low
16	15	PC-5p-301036_5	ATCCTTCCTCCCCAGCCA	18	chr6	-	34553113	34553236	aaaggggcctccagacttggggagggagaggctcATCCTTCCTCCCCAGCCAgggaccttagtgtgactctgctgggggtcggatgggaccgggacctccccaggattatgacggcgcaccacc	0						5'	New	gp4	...((.(((..((..((((((((((....(((((((((....((((((((.((((............))))))))))))..))))))).))....))))))))))....))..)))...))...	118	64.5	-58.9	0	5	0	0	4.2295	0	low
17	16	PC-5p-248028_5	CCAGGAGTAGGGAGGTTGC	19	chr9	-	1006704	1006766	gaacCCAGGAGTCGGGAGGTTGCagtgagccgagattgcgccactgcactccagcctgggcaa	0						5'	New	gp4	...((((((.....((((..(((((((.((((....)).)))))))))))))..))))))...	57	63.5	-30.7	5	0	0	4.54284	0	0	low
18	17	PC-3p-316779_5	TATAGAGATAGTAAACAGGA	20	chr2	-	223393692	223393783	aaaggctacacactgtatgatttattcaatttatgtgacattctgaaggaggaaaattTATAGAGATAGTAAACAGGTtagtggttgccaag	0						3'	New	gp4	...(((.((.(((((..((.((((((...((((((.....((((......))))....))))))...))))))))...))))))).)))...	86	33.7	-20.3	0	0	5	0	0	6.67452	low
19	18	PC-5p-143605_10	TGTGGACTTAGTTTTTATAG	20	chr12	+	82071151	82071242	tattttccaaataacTGTGGACTTTGTTTTTATAGaggttttggtggccagagttaaaagactgaaataaagctacagttttaaagaaacta	0						5'	New	gp4	...((((.....((((((((.(((((((((......((((((..(..(....)..).))))))))))))))))))))))).....))))...	86	30.4	-21.3	10	0	0	9.08569	0	0	low
20	19	PC-3p-215020_6	GAACAAACCGGAAAAAGGA	19	chr8	+	35544481	35544580	gtctgtgctgggacttccgggttcctgttggacttttcctcccaaacttcaccaggtaaggcagGAACAAACAGGAAAAAGGAcagtaccaaccacacct	0						3'	New	gp4	...((((.(((.((((((...((((((((......(((((.((..(((......)))..)).)))))..))))))))...))).))).)))..))))...	94	51	-32.2	0	6	0	0	5.07539	0	low
21	20	PC-5p-65821_36	TGAAATGTTTGTGATGATGC	20	chr1	+	210502683	210502768	atagtttgttaAGAAATGTTTGTGATGATGCtttgtaaatttaaagttctactgaagtactaattattattttcttaatagacaac	0						5'	New	gp4	...(((((((((((((.....(((((..((((((((((((.....))).))).))))))...)))))...)))))))))))))...	80	23.3	-19.8	13	28	0	11.8114	23.6852	0	middle
22	21	PC-3p-50954_51	TGTGGGAGCGGGCTTGCT	18	chr2	+	17333701	17333767	agaaggcttcaccctcataaatagattaatgctattacaaaaatggttTGTGGGAGTGGGCTTGCTc	0						3'	New	gp4	((.((((.((((.(((((((((..(((..((......))..))).))))))))).)))))))).)).	66	40.3	-16.5	5	78	0	4.54284	65.9801	0	middle
23	22	PC-5p-317169_5	GACGCCCAGGGCGTGGGACT	20	chr22	-	48322393	48322515	ccagacacccaggtcctgggactcacgggcacccaGACGCCCAGGCCGTGGGACTcatgaacacccagacacccaggtcctgggactcacaggcacccagacacccaggccctgggactcaca	0						5'	New	gp4	...((..((((((.((((((..((..(((..((..((..((((((((.((((..((.((......))))..)))))).))))))..))...))..))).))..)))))).))))))..))...	117	66.7	-55.4	0	5	0	0	4.2295	0	low
24	23	PC-5p-195652_7	GTTCTGTAAGCCTGTTAAG	19	chr17	-	69570983	69571065	acatggtgaggacatgCTTCTGTAAGCCTGTTAAGtaagagtgccttctccaattaaacatgcaaagaagggtctttccattt	0						5'	New	gp4	..((((.((((((...(((((....((.((((.(((..(((......)))..))).)))).))..))))).))))))))))..	79	41	-21.6	0	7	0	0	5.92129	0	low
25	24	PC-3p-82402_25	GTTCGACTCCCGGTATGGGAACCA	24	chr2	-	130337069	130337149	gcagttcccatatggtctagcggttaggattcctggttttcacccaggtggcccggGTTCGACTCCCGGTATGGGAACAAa	0						3'	New	gp4	...((((((((((((((.(((..(..((...(((((.......)))))...))..)))).))))....))))))))))...	75	55.6	-30.4	19	36	6	17.2628	30.4524	8.00942	middle
26	25	PC-5p-72871_31	AAGGTCCCAAAGTTATGGT	19	chr3	-	25023195	25023259	aAAGGTCCCAAGGTTATGGTaacatcaggctcttaaattaggcctactatggacttgagacccag	0						5'	New	gp4	...((((.((((..((((((......((((.((......))))))))))))..)))).))))...	59	44.6	-21	13	9	9	11.8114	7.61309	12.0141	middle
27	26	PC-5p-196943_6	CTTGAGGGTTGTAGGACTG	19	chr2	-	18242262	18242326	cCTTGAGGGTTGTTGGACTGaggtcctgagttcctcactggctattggctaaagagccctcatat	0						5'	New	gp4	...((((((((.((((.(..(((((.((((...))))..)))).)..)))))..))))))))...	59	50.8	-22.2	6	0	0	5.45141	0	0	low
28	27	PC-5p-200584_6	CTCAGGCCAGGCTGGGAGGA	20	chr1	+	55318684	55318750	atagaaaCTCAGGCCAGGCTGGGAGGAtgctgtaaatgcagcctcccagtctggcctgagttttgct	0						5'	New	gp4	...(((((((((((((((((((((((.(((.......))).)))))))))))))))))))))))...	61	53.7	-51.5	0	6	0	0	5.07539	0	low
29	28	PC-3p-33046_86	CTTTGTATTGGATTTTGA	18	chr7	+	90452612	90452745	tgatgtcacttgctcaatattttttattattattagctcagttatattattttcttcatctaaaaaatatgaattcaaaaCTTTGTATTGGATTTTGAttttaaagaatggttgagctatccttgatttcattc	0						3'	New	gp4	(((..(((...(((((((((((((((..((((..((..((((.(((...((((.(((((.........)))))...))))...)))))))..)).))))..))))))))).))))))......)))..)))...	131	23.9	-22	58	13	15	52.697	10.9967	20.0236	middle
30	29	PC-3p-310606_5	AATCTCGGGTGAGCCACCA	19	chr15	-	41155205	41155297	tttttgtttattggttggttggtttgtcactcagtctggagtacagtggcacAATCTTGGGTGAGCCACCAcgcccagccaattagacagttt	0						3'	New	gp4	...(((((((((((((((.((((...((((((((..((..((......)).))..).)))))))...))))...))))))))).))))))...	87	46.2	-30	0	5	0	0	4.2295	0	low
31	30	PC-3p-18991_153	ACCCTGTGGAGCTTGACTC	19	chr11	-	111821404	111821477	acagccaagggaatgggcttggcggagtcattgggaaaagaagACCCTGTCGAGCTTGACTCtagtctggcatg	0						3'	New	gp4	...((((((((..(..(((((((((.(((.((.......)).))).)))))))))..).))))....))))...	68	54.1	-25.7	273	0	0	248.039	0	0	middle
32	31	PC-5p-140821_10	GCTGGCTGGGCTGCTGGGGC	20	chr2	-	236496471	236496536	GCTGGCTGGGCTGCCGGGGCcactggccacctcccctcagtgtcatggtcctgggagctcaccttc	0						5'	New	gp4	...((.((((((.(((((((((.((((.((.........))))))))))))))).))))))))...	60	69.7	-33.1	10	0	0	9.08569	0	0	low
33	32	PC-3p-45386_59	GGCTAAAACAGTCAGGATG	19	chr5	+	89174354	89174424	aattagtcatcctattttatacccagttctaaatacacagattctGGCTAAAACAGTAAGGATGgctgcag	0						3'	New	gp4	...(((((((((((((((.((.((((.(((........)))..)))).)).)).))).))))))))))...	65	36.6	-19	72	37	5	65.417	31.2983	6.67452	middle
34	33	PC-5p-288807_5	TAGGGTTTCAAGTGTTGGAA	20	chr4	+	16819750	16819824	cTAGGGATTCAAGTGTTGGAAttggggactgaaggaggtgaatgaatcagtttccttttgcactgaaattccatg	0						5'	New	gp4	...((((((..(((((..((...((..(((((..............)))))..))))..)))))..))))))...	69	42.7	-23.1	0	5	0	0	4.2295	0	low
35	34	PC-3p-31541_90	CCACCCTGGCAACTTTGAGGT	21	chr2	-	68629191	68629314	tgcgtttgagataaggaatgaaatatgccctggtctcctgcagtaccctcaggcttattagggtggggaaaaaaccCCACCCTGGCAAATTTGAGGTcagaccagttctctgctctcgagccct	0						3'	New	gp4	...((((((((((..(((...........(((((((..........((((((..((..((((((((((......))))))))))..))..))))))..))))))))))..)).))))))))...	118	50.8	-47.3	84	109	145	76.3198	92.203	193.561	middle
36	35	PC-5p-286928_5	TCTGAAGCAAAGGAAAATT	19	chr1	-	223411411	223411483	aactcctTCTGAAGCACAGGAAAATTagctggaaatagtactattctggtttcaagtgctattagaagggaaa	0						5'	New	gp4	...((((((((((((((..(((.....((..(((.((....)))))..)))))..))))).)))))))))...	67	37	-24.2	0	5	0	0	4.2295	0	low
37	36	PC-3p-198850_6	TTAGTGATATTTCTTGTGA	19	chr2	+	215580617	215580726	aattgagacagtttttcagtaggattagttagagctattgaatgaattttaagtggcaaacaaaattttaaaaatagctTTAGTGATATTGCTTGTGAacagtcttaaca	0						3'	New	gp4	..(((((((.((((...((((..((((.(((((((((((....(((((((..((.....)))))))))....)))))))))))))))..))))...)))).)))))))..	106	28.2	-28.6	0	6	0	0	5.07539	0	low
38	37	PC-3p-45651_59	AGCTTTGCACTGGACTTTGA	20	chr1	+	28681361	28681439	gcgtctcaaaaaaaagaaaatagtttagcagtggctttgtggagaagtgAGCTTTGAACTGGACTTTGAagggagaaga	0						3'	New	gp4	...((((.....((((....((((((((.(((.(((((.....)))))..)))))))))))..)))).....))))...	73	40.5	-18.4	40	39	27	36.3428	32.9901	36.0424	middle
39	38	PC-3p-132830_11	ATAAGGATTGACAGATTGAG	20	chr1	-	231172676	231172771	gaggcttgttgtttctgagtattcatagttcactggtttcctggttttatagatatcatccagaatcaaactATAAGGATTGAGAGATTGAGtaaa	0						3'	New	gp4	...((((...((((((.(((....((((((...(((((..((((...............)))))))))))))))....))).)))))).))))...	90	34.4	-18.1	11	0	0	9.99426	0	0	low
40	39	PC-5p-104851_17	GTGGCACAGGCCAGGGGGTAG	21	chr11	+	76761755	76761822	tcagGTGGCACAGGGCAGGGGGTAGaggacaggagttcccagctgtgactctgcccagattcaccaaa	0						5'	New	gp4	...(((((....((((((((..((.((....((....))...)).)).))))))))....)))))...	62	58.8	-25	11	0	6	9.99426	0	8.00942	low
41	40	PC-3p-227324_6	AGTTGTTTGGGGTAAGGTTT	20	chr1	-	232542533	232542649	ccttcactctgtggggtttggcctcagttcctttaacttagcccctggcgtcttggagagtgggaagtacAGTTGTTTGGGGTCAGGTTTggagggccctgattgctagggtgggaa	0						3'	New	gp4	...((((((((..(.....(((((....(((...(((((..((((..(((..(((..............))).)))..))))..))))).))))))))....)..).)))))))...	111	54.7	-36.7	0	6	0	0	5.07539	0	low
42	41	PC-3p-170201_8	TGCTTGGTGACATTAGAGA	19	chr1	-	29720281	29720342	tcagggcacatgcatgttatcaagggtcactgagaccTGCTTGGTGACATTAGTGAcccatc	0						3'	New	gp4	...((((((.((.(((((((((((((((.....))))..)))))))))))))))).)))...	56	50	-25.7	8	0	0	7.26855	0	0	low
43	42	PC-3p-154274_9	CCGTGTTACCTAGATTTGT	19	chr1	-	172013243	172013359	cattgttttaggatcacccaagaattgaaatacaaaatccagagaagatatatgataccattctaCCATGTTACCTAGATTTGTtgtcagcacggtgattttcctataaaaacactg	0						3'	New	gp4	((.(((((((((((((((......((((...(((((.((.((..((.((....((......))....)).))..)).)))))))..))))...)))))...)))))...))))).))	117	34.2	-20	0	9	0	0	7.61309	0	low
44	43	PC-5p-188921_7	ACTGAATCGTGCAGGAAGCC	20	chr10	+	98080093	98080211	aaattagagtaggcgtggggaggcagacacacaACTGACTCGTGCAGGAAGCCtgtgacataaaacagtgttaacgcatcgtgctggtgagtaattctgatggccaggctctctgaggt	0						5'	New	gp4	...((((((..(((.(((.....((((......(((.((.((.(((.((.((...((((((......))))))..)).)).))))))).)))...))))....))).)))))))))...	113	50.4	-35.8	0	12	0	0	10.1508	0	middle
45	44	PC-3p-233076_6	TGCACAAGTATTTAGGTACTC	21	chr15	-	87963216	87963287	cctgtgtttgaaaacttggattgttttatttttccattcttacgaaaaacAGCACAAGTATTTAGGTACTCt	0						3'	New	gp4	...(((..((((.(((((..(((((((..................)))))))..))))).))))..)))...	66	31.9	-15.4	0	0	6	0	0	8.00942	low
46	45	PC-5p-154817_9	GGACAGTGTATGGTGGGTA	19	chr5	-	119339145	119339225	ccttctGGACAGTGTATGGTGGATAtgaagtctagaattgctgtagaattttatcaacatcagagacgccaattcaggatg	0						5'	New	gp4	..(((((((..((((.(((((...((((((((((.........))).)))))))...)))))...))))...)))))))..	77	40.7	-16.7	0	14	0	0	11.8426	0	middle
47	46	PC-5p-55705_45	GGGGAACTGAAACATCTA	18	chr1	+	221786567	221786651	tgaGGGGAATTGAAACATCTAcgttaatggccagcatcaactgtagccgcatgaatgaggccatcttggatgttccacccccagc	0						5'	New	gp4	...((((...((.((((((((.....((((((..(((((..(((....))))).))).))))))..)))))))).)).))))...	79	50.6	-26.4	14	30	9	12.72	25.377	12.0141	middle
48	47	PC-5p-145045_10	GCAAGGACCCGGGGTTTCTG	20	chr8	+	22721906	22721962	atcgtGCAAGGACCTGGGGTTTCTGcttttgcaatcgcccctgggttcatccacacc	0						5'	New	gp4	...(((...(((((((((((...(((....)))...))))).))))))...)))...	51	56.1	-22.9	0	10	0	0	8.45899	0	low
49	48	PC-5p-13816_207	CCTGGGCCTGCACTGACGC	19	chr2	-	128027343	128027410	ttggtCCTGGGCCTCCACTGACGCgtcgggcgtggggccaatgggcgggcgggggaggcaggggcagg	0						5'	New	gp4	...(((((..((((((.(((.(((....(((.....))).....)))..))).)))))).)))))...	62	76.5	-33.8	110	85	12	99.9426	71.9014	16.0188	middle
50	49	PC-3p-298143_5	TTTTGTAAATGAGGTGTTC	19	chr4	-	113363189	113363284	aaatactactttgtaaacacattaacttcaaggtttcagtctctacattttgctttgtgaTTTTGTAAATGATGTGTTCtttatattgtggtgagt	0						3'	New	gp4	...((((((..(((((((((((((....(((..(..(((...............)))..)..)))....)))))))))...))))..))))))...	90	29.2	-19.7	0	5	0	0	4.2295	0	low
51	50	PC-5p-246022_5	GGGGAGTTTGGCTGGGGCGG	20	chr13	-	58860982	58861041	cGGGGAGTTTGGCTGGGGCAGtgggagaaaagcccggccaccaaacggccagactccagg	0						5'	New	gp4	...((((((((((((((((..((((.......))))))).))....)))))))))))...	54	66.7	-30	0	5	5	0	4.2295	6.67452	low
52	51	PC-3p-298391_5	CTCCTTGGGGGTCGGTTTTT	20	chr20	-	24004480	24004611	ctcaggcgaggcggtattcctcgggattcttttctgcagtggataaggagataacagggaggagaaggaaagcaactgttCTCCTTGGGGGTCGGTCTTTatgcagataagggaaaactctcttggcctctg	0						3'	New	gp4	...((((.(((.(((.((((........(((.((((((......((((.(((..(((((((((..((........)).)))))))))...)))..))))..)))))).))))))).)).).))).))))...	126	50.8	-42.5	0	5	0	0	4.2295	0	low
53	52	PC-3p-292950_5	CTGGGCTTCACCCTGGCGGG	20	chr19	+	5073353	5073438	gcagcctggggagagccagcagccccggtggggagcaggctctaggctccgcagtctgtactggagCTGGGCTTCACCCAGGCGGG	0						3'	New	gp4	...(((((((..(((((..((((.((((((..((((.(((.....)))..))..))..)))))).)))))))))..)))))))...	80	70.9	-46.2	0	5	0	0	4.2295	0	low
54	53	PC-5p-267137_5	GGGAGCGGGTGTGGGGACA	19	chr1	-	29317698	29317811	cggggtgaccgagttcagcgtctacaGGGAGCGGGGGTGGGGACAgagagttacgtccagggcttgctgggcctcctcacatccccatgaaggaggctggactgagttactaat	0						5'	New	gp4	...((((((..((((((((.(((.((((((...((((.(((..(((..(((..........)))..)))..)))))))...))))..))..))).))))))))..))))))...	108	60.5	-46.5	0	5	0	0	4.2295	0	low
55	54	PC-3p-303338_5	TTGAATCCTGTCCCCTCCAC	20	chr15	-	84858822	84858956	ctcccagctgaggacgcagacagcagttgagacaggaacttcagtttgcattctaggtccctaactctggaagcctgcatTTGAATCCTGTCCCCACCACtctgtaatcatgcgacatctctgtaaagggggact	0						3'	New	gp4	(((((.((.((((.((((((..((((.((.(((((((..(((((..((((((((((((.....)).))))))...)))).)))))))))))).....))..))))..)).))))...)))).))...)))))...	132	51.1	-43.6	0	0	5	0	0	6.67452	low
56	55	PC-3p-126633_12	CTTAGGCTTGAGCCTGCTGGC	21	chr2	-	212932991	212933140	tgtgtctagtggcctttgaactaggacatggtgtttttttcctgccttcacactcaaattgaagcatcagttctttCTTAGTCTTGAGCCTGCTGGCctttggaatggaccacaccatcaactgtcctggttgtcaggcctttggacttg	0						3'	New	gp4	...(((((..(((((...((((((((((((((((((..((((.(((..((..(((((((((((((....))).....))))).)))))..))..)))....))))..))..)))))).....))))))))))...)))))..)))))...	144	46.7	-51.1	6	6	0	5.45141	5.07539	0	low
57	56	PC-5p-12125_234	AAACACAGCACTCTGCAAAC	20	chr18	+	47105292	47105379	cAAACACAGCCCTCTGCAAACaactgctaacatcacaaagggattctactgcttgaggcagtgttttaatgcaataggttagtgtcat	0						5'	New	gp4	...((((((((...(((((((.((((((....(((...((........))...))))))))))))....))))...)))).))))...	82	42	-21.5	138	157	108	125.382	132.806	144.17	middle
58	57	PC-5p-251848_5	AAACCCAAGGAGGAAGGAATG	21	chr19	+	20283860	20283944	ccctgccAAACCCAAGGAAGAAGGAATGatgataaatatctccactggatatcgttatcctcctatttgcctagggagagcacta	0						5'	New	gp4	...(((....(((.(((.(((((((..((((((..((((((.....)))))).)))))).)))).))).))).)))...)))...	79	44.7	-22.4	5	0	0	4.54284	0	0	low
59	58	PC-5p-221974_6	CCGGTGAAATACCACTACC	19	chr19	-	24000181	24000253	gCCGGTGAAATTCCACTACCctgatcattttttcactgacctggtgaagttggggctggggaggaaagccaaa	0						5'	New	gp4	...(((....((((.((((((..((......((((((.....))))))))..))).)))))))....)))...	67	50.7	-24.2	0	6	0	0	5.07539	0	low
60	59	PC-5p-186410_7	TTGGCTGGTAGGGTTGCCA	19	chr3	-	147677603	147677675	cTTGGTTGGTAGGGTTGCCAttatttggatgttattaagagatctaatttcggcaactcaggaaccaactcct	0						5'	New	gp4	...(((((((.((((((((.....((((((.((.....)).))))))....))))))))....)))))))...	67	41.1	-25.5	0	7	0	0	5.92129	0	low
61	60	PC-5p-9574_292	AAGCGACTGTTTAACAAA	18	chr5	+	116632911	116633006	gtcatgaatAAGCGACTGTTTAAAAAAaattagggacacgtctacgcaatggaattctctacagattttttttctagcctcagctgctgttataat	0						5'	New	gp4	...((((...(((....(((.(((((((((((((((....((((.....))))..)))))...))))))))))..)))....)))....))))...	90	35.4	-15.7	437	518	283	397.045	438.176	377.778	high
62	61	PC-5p-299270_5	AAATTCTTGGATTTGTTG	18	X	-	34456617	34456674	atttgtacAAATTCTTGGATTTGTTGgtttccatcaaatttgggaaaaattgtcattg	0						5'	New	gp4	...((.((((.((((..((((((.(((...))).))))))..))))...))))))...	52	29.3	-15.4	0	5	0	0	4.2295	0	low
63	62	PC-5p-41127_66	TGAGACAGGTGCTGCATGG	19	chr21	-	30503978	30504065	tagttgtcgaagccaAGAGACAGGTGCTGCATGGagattaatcaagagtggtctcaatgttgtatctgtttcactaattcaacaaagt	0						5'	New	gp4	...((((.(((.....(((((((((((..(((.((((..(........)..)))).)))..))))))))))).....))).))))...	82	39.8	-28.6	21	49	7	19.0799	41.4491	9.34433	middle
64	63	PC-3p-93680_21	TATGGAGAGTTTGATCCTG	19	chr8	-	109035707	109035803	tttccaatttagggtgatgtgttctatagggtatattgttgtttagatatcttttattattgcaattTATGGAGAGTTTTATCCTGaatttaggttc	0						3'	New	gp4	...((((((((((((((....((((((((........(((((...((((.....))))...)))))))))))))....))))))))))))..))...	91	28.9	-21.4	14	21	0	12.72	17.7639	0	middle
65	64	PC-5p-41341_66	ATGGGGTGCAAGCTCTTGA	19	chr11	-	114446780	114446857	ctggcATGGTGTGCAAGCTCTTGAggccctagaaccacctcccaccttctccaacctcatgctttgcactccagcatt	0						5'	New	gp4	...((.(((.((((((((...(((((....((((............))))....))))).)).)))))).)))))...	72	55.1	-23.9	27	69	16	24.5314	58.367	21.3585	middle
66	65	PC-5p-286987_5	TTGGTTGTCCCGGGGAAAG	19	chr4	-	52724960	52725041	aattagaacaTTGGTTGTCCCTGGGAAAGtggaaatggtagggagcatgaaggactttccggggtgatagtatgttctatac	0						5'	New	gp4	...((((((((..((..((((..(((((((....(((........))).....)))))))))))..))...))))))))...	76	43.9	-27.3	5	0	0	4.54284	0	0	low
67	66	PC-5p-183826_7	GTGTTGGATGTCCCTGTTGCT	21	chr20	-	62315279	62315351	gatccataggGGGTTGGATGTCCCTGTTGCTggcccaacagaaagacttggggacatgaagccaggatggtcc	0						5'	New	gp4	((.((((....((((..(((((((((((.(((......)))...)))..))))))))..))))...)))))).	72	56.2	-26.7	0	12	0	0	10.1508	0	middle
68	67	PC-5p-120283_13	GAAGCTTGCTGGAGGTATCA	20	chr1	-	88037660	88037724	GAAGCTTGCTGGAGGTATGAtcaaggcactcaggttctttgctccttccccagtctgagagcagc	0						5'	New	gp4	...(((((((((.((...((.(((((.((....)).))))).))...)))))))....))))...	59	53.8	-19.7	0	13	0	0	10.9967	0	middle
69	68	PC-3p-246943_5	TTAGAGGCCTTGGGGATGAAA	21	chr6	-	160129237	160129306	cttgttttgtttgggtttttggagaaggcagatattccctgcgtTTAGAGGCCTTGGGGAAGAAAaccag	0						3'	New	gp4	((.(((((.((((((..(((...(((.((((.......)))).))))))..)))....))).))))).))	70	45.7	-15.9	0	0	5	0	0	6.67452	low
70	69	PC-3p-56421_45	CTGAAGGACTGCTTGATACGA	21	chr5	+	116694590	116694684	agaaatcgtatagcagtattcactaataaggtaatttaaactcattttcaaggatgagaagaatgaactCTGAAGGACTGCTTGATATGAttcca	0						3'	New	gp4	...((((((((((((((.((((......((...((((...((((((......))))))..))))...)).))))..))))))..))))))))...	89	32.6	-21.4	27	26	34	24.5314	21.9934	45.3867	middle
71	70	PC-5p-72593_31	AGTGCTAAGTGTTAGAGGG	19	chr6	+	152894741	152894823	atatgccagacAGTGCTAAGTGTTAGAGGTtaaggatgtgtaacatctagttcacttctatatatgcttacagtttggtaaag	0						5'	New	gp4	...((((((((..((.((((..((((((((.(((((((.....)))))..)).)))))))...)..))))))))))))))...	77	36.1	-24.2	6	18	7	5.45141	15.2262	9.34433	middle
72	71	PC-5p-49834_53	ATCCTGGGGCTGAAGCCG	18	chr1	-	73621105	73621163	ccttgcATCCTGGGGCTGAAGCCTacttgattgtagtagctaagctttttgatgtactg	0						5'	New	gp4	...((((((..(..(((..(((((((......))))..))).)))..)..))))))...	53	45.8	-18.1	19	28	15	17.2628	23.6852	20.0236	middle
73	72	PC-3p-146105_9	GCATTGCGATGGCCAGAAA	19	chr6	-	44691199	44691255	tagtctggtcagcaaatctacagccatatggtgtgagGCATTGCTATGGCCAGAAAa	0						3'	New	gp4	...((((((((((((.(((...(((....)))...)))..))))..))))))))...	51	45.6	-20.2	9	8	0	8.17712	6.76719	0	low
74	73	PC-5p-159623_8	TTTCTAGAGATAGATTGG	18	chr6	-	44918043	44918106	tTTTCTAGAGATACATTGGtcatttaacttaatgtcacaggttaccagctgtatcactagatta	0						5'	New	gp4	...(((((.(((((((((((.....(((((........)))))))))).)))))).)))))...	58	32.8	-18.2	0	0	14	0	0	18.6887	middle
75	74	PC-3p-233897_6	TGTTTAGGATAGGTGGGAGA	20	chr8	-	24186423	24186485	ggacctttctgcactgaatatattatacgttgacaactatagaTGTTTAGGATAGGTGGGAAA	0						3'	New	gp4	...(((..(((..((((((((.(((((.(((...))))))))))))))))..)))..)))...	57	36.5	-15.2	0	0	6	0	0	8.00942	low
76	75	PC-5p-129926_12	GAATCCTCTCGTGGACACCA	20	chr7	+	121529736	121529801	ttaGAATCCTCTCGTGGTCACCAgtattctgatatttcagcatggtgtatcttgttaggtttcaat	0						5'	New	gp4	...(((.(((..(..((((((((.....((((....))))..))))).)))..)..))).)))...	60	37.9	-17.5	8	28	0	7.26855	23.6852	0	middle
77	76	PC-5p-188509_7	GATTGAGGGACGGAGAAGGT	20	chr15	+	84797722	84797814	caagggtggaagtccaagtGATTGAGGGAGGGAGAAGGTgcctggatagttctgttcctcttctccatccctcctcttgcagcaccacctctg	0						5'	New	gp4	((..(((((.....((((.....((((((.((((((((.....(((((....))))).)))))))).))))))..)))).....)))))..))	93	54.8	-36.6	0	7	0	0	5.92129	0	low
78	77	PC-5p-129949_12	AGTGATACCCTGCTTCCAG	19	chr10	-	65404886	65404964	tcAGTGATTCCCTGCTTCCAGtatttaagtccttgtgccttttcctgacacactgactctggaatagctctgttactca	0						5'	New	gp4	..((((((.....((((((((......((((..((((...........))))..)))))))))..)))...))))))..	75	44.3	-18	0	7	5	0	5.92129	6.67452	low
79	78	PC-3p-199795_6	CGCGCGTCAGTCGCCGGCAA	20	chr12	+	119989072	119989178	tgggcgtcgctgaggagacccgcgagccggcgaatcccgcgcgggcggggcgaacaggtgcccgCGCGCGTCAGGCGCCGGCAAggggcggggcgaggggacgcggc	0						3'	New	gp4	...(((((.((.......(((((..(((((((...((.(((((.(((((((......)).))))).)))))..))))))))).....)))))....)).)))))...	101	81.3	-58.5	6	0	0	5.45141	0	0	low
80	79	PC-5p-321137_5	CAGGGCAAGGAACCGGGA	18	chr4	+	37853892	37853984	ttctgtgacggtgtgggctCAGGGCAAGGAACCGGGAtggtctaagaacttctttcaaaccctgttcctgctttccacccctgcctcacatct	0						5'	New	gp4	...(((((.(((..(((...(..((.((((((.(((.......(((.....))).....))).))))))))..)...)))..))))))))...	87	53.8	-32.3	0	0	5	0	0	6.67452	low
81	80	PC-3p-264193_5	TGTAGAATAGGTGGGAGAG	19	chr2	+	225300552	225300610	agttcttccactgatacaaagccaggatcttctgtcacTGTAGAAGAGGTGGGAGAGtt	0						3'	New	gp4	..((((((((((..((((....((((....))))....)))).....))))))))))..	55	45.8	-17.8	5	0	0	4.54284	0	0	low
82	81	PC-5p-7258_377	GATGCTTCGCAACTTTTTT	19	chr8	+	40408875	40409003	tctcactaaaatagtgtttaggatataaaaGATGCTTTGCAACTTTTTTttttccaattaatggaaaatcgctgaattaagaaagtttacaaagctagctgaaagcatatccgggctgggcgcagtggc	0						5'	New	gp4	..(((((....((((.....((((((...((..((((((.((((((((((((((((.....)))))))..........)))))))))..))))))...))......))))))..)))).....))))).	126	36.4	-29	47	42	288	42.7027	35.5278	384.452	high
83	82	PC-5p-21334_136	ACGGGCTTGGCAGAATCAGC	20	chr16	-	81868467	81868540	aaccacaggACGGGCTTGGCAGAATCAGCcaggaaagacccagctgaatttgactctagtctgacactgtgaag	0						5'	New	gp4	...(((((..((((((.((((((.(((((..((.....))..))))).)))).))..))))))...)))))...	68	51.4	-27.3	390	15	37	354.342	12.6885	49.3914	high
84	83	PC-3p-157494_8	TGACACCTGCCCGGTGCTGG	20	chr15	-	78925165	78925221	gtggcccagactcctgtgtgtcagacccttcaTGACACCTGCCAGGTGCTGGgcgtt	0						3'	New	gp4	...((((((...((((.((((((((....)).))))))....))))..))))))...	51	61.4	-25.9	0	16	0	0	13.5344	0	middle
85	84	PC-3p-234277_6	GTGAGCCGTGGAGAAGGAAC	20	chr12	-	131650059	131650162	aggccagtgtgcagatgagggacattggtctccacagtgttcaaccattcagccaagatcacggccaGTGAGCTGTGGAGAAGGAACccacatctgcctggatc	0						3'	New	gp4	...((((...(((((((.(((...((..((((((((((..(((........(((........)))...)))))))))))))..)).))).)))))))))))...	98	54.8	-41.8	0	6	0	0	5.07539	0	low
86	85	PC-5p-112639_15	GAGTAGGTAGCTGCCATATT	20	chr11	+	127772213	127772289	gtgGAGTGGGTAGCTGCCATATTgattaagaaggggacagacttaccctcaactgtgagagttacctaaagctcagc	0						5'	New	gp4	...((((((((((((..((((((((.......(((..........))))))).))))..))))))))...))))...	71	48.1	-22	8	7	0	7.26855	5.92129	0	low
87	86	PC-3p-33759_84	CTGTTCGCCCATTAAAGC	18	chr4	+	6566052	6566140	ccagggtccatgctgctgatcgggaagactgtttggcactggacgtagtctcaagCAGTTCGCCCATTAAAGCaagaggaagtccccca	0						3'	New	gp4	...((((((.((((..((((.(((..(((((((((..((((....))))..)))))))))..))))))).))))...)))...)))...	83	55.1	-33.1	39	46	25	35.4342	38.9114	33.3726	middle
88	87	PC-5p-257116_5	CCCAAATCCTTATATCTGTAA	21	chr15	+	70788606	70788730	taaactatgggttatgctaagcatCACAAATCCTTATATCTGTAAgatgactcagacatgtctcaaatggtagtctcctccccacttatctatggtttggctttctgatgtttgttacccacagt	0						5'	New	gp4	...(((.(((((...((.((((((((.(((.((...(((..(((((.((....((((.(..(......)..)))))......)))))))..)))....)).))).)))))))))).))))).)))	122	39.2	-28.1	5	0	0	4.54284	0	0	low
89	88	PC-5p-243261_5	ACACAATAAGGATTGACAGA	20	chr2	+	32386955	32387019	ACACAATAAGGATTTACAGAcccatagaactctctgagacagctttgggctgaaactttattaat	0						5'	New	gp4	....(((((((.(((.(((.((((.((..(((...)))....)).)))))))))))))))))...	58	36.9	-16	0	5	0	0	4.2295	0	low
90	89	PC-3p-276722_5	TTCGACTCCCGGTGTGGGAAC	21	chr15	-	26082164	26082265	aacggttacttgtcatctcccacatggtctagcggttaggattcctggttttcacccaggcggcccgggTTCGACTCCCGGTGTGGGAATgactggaccttt	0						3'	New	gp4	...((((....(((((.((((((((((((.(((..(..((...(((((.......)))))...))..)))).))))....)))))))))))))..))))...	96	55.9	-38	0	5	0	0	4.2295	0	low
91	90	PC-3p-64961_36	TTTGGGATGGAGGATTTAT	19	chr5	-	77764793	77764872	gggtagagtccagattcagatcacatcaagcaagatgttttcttgTTTGGGATGGAGAATTTATattgggatggctagca	0						3'	New	gp4	...(((.((((((((((...(((..((((((((((.....))))))))))..))).))))))......))))..)))...	74	41.2	-20.5	20	7	9	18.1714	5.92129	12.0141	middle
92	91	PC-5p-262330_5	TTCAGGAGCAGGAGCGTGGT	20	chr3	+	172356600	172356678	gtgtcaaaggagctTTCAGGAGCAGGAGCTTGGTgggaggccagttccgactcctcctccaggaagccttctatgaata	0						5'	New	gp4	...(((.((((((((((.((((.(((((.(((((((....)))...))))))))).)))).)))))).)))).)))...	73	54.4	-32.9	0	5	0	0	4.2295	0	low
93	92	PC-3p-131802_11	AATTTGAGAGGATCTGCTCC	20	chr20	+	17754374	17754445	taccaggaaggtgagctgtccctactcacatatttgggcagcAAATTGAGAGGATCTGCTCCactcctgcag	0						3'	New	gp4	...((((.((..((((....(((.((((...(((((.....))))))))))))....))))..))))))...	66	51.4	-22	5	14	0	4.54284	11.8426	0	middle
94	93	PC-5p-318375_5	GAAGGAGGGACAGAAAGAACC	21	chr16	+	80484362	80484470	ggaagaaaGAAGGAGGGAGAGAAAGAACCtatatcaagttacaatagtgatttatctgtatatactagaaatttgagggggattttgtttatattttctttatttttat	0						5'	New	gp4	...(((((.(((((..(..(((.(((((((...(((((((....(((((((........)).)))))..)))))))..))).)))).)))...)..))))).)))))..	104	28.4	-18.1	0	5	0	0	4.2295	0	low
95	94	PC-3p-119893_13	GAGGGTGAAGGACTTGCTC	19	chr2	-	8415116	8415227	agtgctcagcaacctgctctttgtgcatcgtctccatctgagatgagccaagtcacagcttgtctccaGAGGATGAAGGACTTGCTCaagaccagtaggtgtgctgagccca	0						3'	New	gp4	...(((((((((((((((.((((.(((..((((.(((((((((..(((.........)))..))))....)))))..)))).))).))))...))))))).))))))))...	106	52.7	-48.2	0	13	0	0	10.9967	0	middle
96	95	PC-3p-222446_6	CCTGACCGGGATCCACCTGT	20	chr12	-	49292026	49292103	tttggtagagacggtgcttcaccatgttagctaggatggtctcgatctCCTGACCGTGATCCACCTGTctcggcctcc	0						3'	New	gp4	...((..(((((((((..((((...(((((...((((.......)))).))))).))))..)))).)))))..))...	72	55.1	-27.5	6	0	0	5.45141	0	0	low
97	96	PC-3p-246570_5	AAACCACCTTGTCCTCACTC	20	chr4	-	109738430	109738496	ggcggcagggaggaggtgtatcaaagaatttatggacatatttgaAAACCACCTTGTCCTGACTCag	0						3'	New	gp4	...(((((((..((((((..(((((...............)))))....)))))).))))).))...	61	46.3	-16.3	0	5	0	0	4.2295	0	low
98	97	PC-5p-110870_15	TTCTTGACGATCATAGAGC	19	chr4	-	74416349	74416456	tccctagtttTTCTTGAAGATCATAGAGCaaaatagataaggctgctagtcataaagtttctgatttcctgtcttagcatattgtcctaatctaagaaagaatagtca	0						5'	New	gp4	...(((.((((((((..((((..(((..(((.((...((((((....(((((.........)))))....))))))..)).)))..))))))))))))))).)))...	102	33.3	-22.1	0	15	0	0	12.6885	0	middle
99	98	PC-5p-323315_5	ATCCAGGGCCTGGAAGTGG	19	chr20	+	50142035	50142112	actgagtcATCCAGGGCCTGGGAGTGGagatagtgtattaacaactatgttgtactctgccttgaagtgtgactctgg	0						5'	New	gp4	...(((((((.((((((...((((((...(((((((....)).)))))....))))))))))))....)))))))...	72	47.4	-25.4	5	0	0	4.54284	0	0	low
100	99	PC-3p-17315_167	CGAGTCCCATCAGCCACCCCA	21	chr1	+	7426032	7426128	acaggtgagctgcggtcctggaaaaggtggcagggtaggggcctcctggcatctgcagggctcctccctccttctgCTAGTCCCATCAGCCACCCCA	0						3'	New	gp4	...((((.((((.((..((((...((..((.((((.((((((((....((....)).))))))))))))))..)).))))..))..))))))))...	91	63.9	-44.2	84	162	48	76.3198	137.036	64.0754	middle
101	100	PC-5p-74926_30	TTAAGTGGGAAACGATGTG	19	chr2	+	80640459	80640536	ctgagataacTTAAGTGGGAAAAGATGTGattaggctgaaccttttcaccatgtctttgtttgcttgagttatttatt	0						5'	New	gp4	...((((((((((((..(..((((((((((..(((.....)))..))))...))))))..)..))))))))))))...	72	34.6	-28	19	9	23	17.2628	7.61309	30.7028	middle
102	101	PC-5p-318324_5	GGGTCATGGACTGCATTTA	19	chr3	+	196495410	196495503	atccaGGGTCATGCACTGCATTTAgctgtcattctcttttaatctccctttcaactagaatgattcctaaggctttgccttcatgacactgaca	0						5'	New	gp4	...(((.((((((((..((.(((((..((((((((..((.((.......)).))..))))))))..)))))))..)))....))))).)))...	88	41.5	-24.7	0	0	5	0	0	6.67452	low
103	102	PC-3p-298875_5	GAACACGGTAACTACACTGGC	21	chr20	-	32154705	32154770	ggaggagtgtgtctaccttgttctctgatgtactctcatcactgaGAACACGGTAACTACTCTGGC	0						3'	New	gp4	...((((((.((.((((.((((((((((((......)))))..))))))).))))))))))))...	60	48.5	-25.9	0	5	0	0	4.2295	0	low
104	103	PC-5p-197028_6	CGTGGGCTTGGAGGTAGTGAC	21	chr6	+	16821656	16821757	gcCGTGGGCTTGGAGGTAGGGACacagaatgatgatggtgggcaaattttcattgaagcctggatcatccagctctgagccccttcttcttcagcacacatc	0						5'	New	gp4	...(((.(((.(((((.((((...((((.((..((((((((((..............))))..))))))))..))))...)))).)))))..))).)))...	96	52	-32.6	0	6	0	0	5.07539	0	low
105	104	PC-3p-157039_8	AACAGTCAGGATTTTGGCTT	20	chr11	-	54557828	54557927	tcaagggaagggaacccagaaacatgacaggccagcaaaagggtaaaagttgttttttttttttttcACCAGTCAGGATTTTGGCTTctctctccctgta	0						3'	New	gp4	...(((((((((((.((((((...((((.((.....((((..(.............)..)))).....)).))))...)))))).)))))).)))))...	94	42	-29	0	8	0	0	6.76719	0	low
106	105	PC-3p-129162_12	AGCGGTCTGTTTTTTGACA	19	chr18	+	62782829	62782940	tggtaatttttgacagattaagatcagatgttttcggggcaaagcgctatttgttttttgacttccAGTGGTCTGTTTTTTGACAtctgtttgtgctgtagtaaaattaatt	0						3'	New	gp4	...(((((((..((((....(((.((((((((...(..(((...((((....(((....)))....))))...)))..)..)))))))))))...))))...)))))))...	106	33.9	-26	0	12	0	0	10.1508	0	middle
107	106	PC-5p-209587_6	CAATGGACAATGGTGGAGTG	20	chr13	+	44427823	44427884	aCAATGCACAATGGTGGAGTGcagcataataattgcaataaacctcccattggaagcatagg	0						5'	New	gp4	...((((.((((((..(.((...(((.......))).....)))..))))))...))))...	56	41.9	-15	0	6	0	0	5.07539	0	low
108	107	PC-3p-201189_6	TGTGGGTTTTTGCAGTTGAT	20	chr3	+	5635033	5635135	acagtatttggggtgtctcctaggtcctgcaggagcagtccgctttcttcagagggtcTGTGGGTTCTTGCAGTTGATctggagctaaaattcacaatgcaat	0						3'	New	gp4	...(((((..(..(..((((.(((((((((((((((((.((.(((......))))).))))....))))))))..))))))))).....)..)..)))))...	97	48.5	-34.7	6	0	0	5.45141	0	0	low
109	108	PC-5p-151447_9	TGGAAATAGCTGTTTCTCT	19	chr10	-	65369760	65369860	tttgcttgggcaccagaatcaTGGAAATAGCTGTTTTTCTccacagttacagctggtgttgggcagctccccttccaagacttgtgcttcctcctggctct	0						5'	New	gp4	...((..((((((.((..((.(((((..((((((...((..((((((....))).)))..))))))))....))))).)))).)))).....))..))...	95	50.5	-27	0	0	9	0	0	12.0141	middle
110	109	PC-3p-232326_6	TCTGTGCTGGAAACGATGA	19	chr4	+	170668109	170668173	ccattatagcaccacacagaacagtttcactgctttggaagctTCTGTGCTGGAAACTATGAcga	0						3'	New	gp4	...((((((..(((((((((..((((((.........)))))))))))).)))...))))))...	59	44.6	-19	0	6	0	0	5.07539	0	low
111	110	PC-5p-63014_38	GTGCTGGAAGATTAATTGAT	20	chr3	-	67900754	67900833	gttggttttaGTGCTGGAAGATTAGTTGATgtgattaggtgaatcaggaacatctcattaatctggtgcatgctacctgt	0						5'	New	gp4	...(((....((((....((((((((.(((((((((.....))))....)))))..))))))))...))))...)))...	74	40	-20.1	34	13	7	30.8913	10.9967	9.34433	middle
112	111	PC-3p-60435_40	CAGGACGGTGGTCATGGAAGTC	22	chr8	-	108292363	108292461	ttatcatttccatatgactgtcattgcttaaaactagctagtatgagCAGGACGGTGGCCATGGAAGTCgaaattcgctaaggagtgtcaaacaactca	0						3'	New	gp4	...((((((((((...((((((.(((((((..(((....))).)))))))))))))....)))))))).))...........((((........)))).	68	41.4	-27.3	108	47	11	98.1254	39.7573	14.6839	middle
113	112	PC-3p-73497_30	AGGTTGGCTTAGAAGCAGC	19	chr6	-	165050662	165050745	atactgctcatctccgaaatcctctgcagcctgcaggactgcctgtttttcacctgcagttagAGTTTGGCTTAGAAGCAGCaa	0						3'	New	gp4	...(((((..((((((((.((..((((((...(((((....))))).......))))))...)).)))))...))))))))...	78	48.8	-26.8	12	35	21	10.9028	29.6065	28.033	middle
114	113	PC-3p-301966_5	GCTTCTTTTGGACTGTAGGG	20	chr5	+	126188630	126188724	gatgctaacctcatttgtccagaggtgctttgctgggactgtctggttagtctgctttgctccctGCTTCCTTTGGACTGTAGGGgtgtggcttc	0						3'	New	gp4	((.(((((((((....(((((((((......((.((((..((..(((......)))..)))))).))..)))))))))....))))).)))).))	95	52.6	-36.4	0	0	5	0	0	6.67452	low
115	114	PC-3p-75436_29	GATGTCAACTGGTTGTTGG	19	chr9	-	33345787	33345879	ccggtatggtgctagagaaaagccagcaactagacttgacagatacggaaattgagtGATGTCAAATGGTTGTTGGcctggtatctgagcagt	0						3'	New	gp4	...((..((((((((......(((((((((((...((((((..(((.........))).)))))).)))))))))))))))))))...))...	87	46.2	-31.4	5	18	6	4.54284	15.2262	8.00942	middle
116	115	PC-5p-232499_6	AAACCGGATGCCTACAAAC	19	chr1	-	174951697	174951774	AAACAGGATGCCTACAAACctttctaaaccaggtgtggatgttgggggctggtaggtttgaggggtacatgcttgaga	0						5'	New	gp4	...((((.(((((.(((((((..(((..((...............))..))).)))))))..)))))....))))...	72	48.7	-18.8	0	11	0	0	9.30489	0	low
117	116	PC-5p-37149_75	CCACCTGGACTAATACTGA	19	chr11	-	112802329	112802397	CCACCTGGACTAATTCTGAttcctcccctgcttggcactgtaggagacacatagacttttccaaggaga	0						5'	New	gp4	...((((((..((.((((.....((.(((((........))))).))....)))).)).)))).))...	63	49.3	-15.5	19	37	33	17.2628	31.2983	44.0518	middle
118	117	PC-3p-320511_5	TGCGGGATGGGCAGTCTGG	19	chr13	-	42510018	42510080	gaactaaactagcagttctgcaacaacacgaaatgctggggTGCGGGATGGGCAGTTTGGatg	0						3'	New	gp4	...(((((((.((.((((((((.(..((........))..)))))))))..)))))))))...	57	50.8	-20.7	0	5	0	0	4.2295	0	low
119	118	PC-3p-283231_5	GGAGTTTGGCTGGGGCGGC	19	chr9	-	31809326	31809383	gcaggccgtcaggccaccgaccagtggaattacatGGAGTTTGGCTGGGGCGGTcaga	0						3'	New	gp4	...(((((((.(((((....(((.((......)))))....)))))..)))))))...	52	62.1	-23.9	0	0	5	0	0	6.67452	low
120	119	PC-5p-78146_28	AATTTCATCGTGATGGGG	18	chr2	-	209899754	209899814	gaAATTTCATTGTGATGGGGaaacacaaattgtagttcctgactcatcaagaatgagaggc	0						5'	New	gp4	....(((((((.((((((((((..((.....))..)))))....)))))..)))))))...	54	39.3	-15.6	72	0	0	65.417	0	0	middle
121	120	PC-3p-124977_13	TTTCACGTTGCGAAGAAAA	19	chr8	+	15999150	15999232	attagaaggtttatgatttatctctgtagcatggagcttgtggtaatgTTTCACGTTGCAAAGAAAAagtctaacctttttgt	0						3'	New	gp4	...((((((((...(((((.(((.((((((.((((((..........)))))).)))))).)))..))))).))))))))...	77	33.7	-23.2	0	0	13	0	0	17.3537	middle
122	121	PC-5p-150752_9	CCGAGATTCCGTTAGTAGT	19	chr8	+	140118372	140118489	tcaactgttatggccttcaagaggctcCAGAGATTCCGTTAGTAGTcaaaggattctgtaatgtctgagtatcttagtggacaccctgtgaagtctctttctagcccacaatggtctc	0						5'	New	gp4	...((..((.(((.((..((((((((.((.((..(((..(((((.(((...(((........)))))).)))..))..)))....)).)).))))))))...)).))).))..))...	112	44.9	-28.9	0	9	0	0	7.61309	0	low
123	122	PC-5p-176237_7	CTGGGTGTGGAAGCGCAGT	19	chr5	+	116283976	116284063	aaataacttaCTGGGTGTGGAAGCGCACTtctaatcccagctactcacaggctgaggcaggaggttcgtttacacccaggagttagtt	0						5'	New	gp4	...((((((.(((((((((..((((.((((((...(((((((.......))))).))..)))))).)))))))))))))))))))...	82	48.9	-38.2	0	7	0	0	5.92129	0	low
124	123	PC-3p-207506_6	GCACTTCAGGGGCTCGAAA	19	chr13	-	40082934	40083056	cttccatgttctctctaggctcactaaccctgcactccatatttctgggcctcagtttcccatacagGCACTTCAGGGCCTCGAAAggtctgcgggcaagggtgccttgggaggatgcggtcc	0						3'	New	gp4	...((..((((((((.((((...((...((((((..((...((((..(((((.(((..((......)).)))...)))))..))))))..))))))...))..)))).))))))))..))...	117	56.9	-46	6	0	0	5.45141	0	0	low
125	124	PC-5p-271838_5	GGTGGCTTGAGCATCGGAG	19	chr10	+	84312980	84313047	gGATGGCTTGAGCATCGGAGgtgaaggctgcagtgagctgtgattgcaccactgtactccagccaggg	0						5'	New	gp4	...(((((.(((...(((.((((......((((....)))).....)))).)))..))).)))))...	62	58.8	-24.3	5	0	0	4.54284	0	0	low
126	125	PC-3p-16515_175	CGGAAGCAGGGAGGACCAT	19	chr3	-	170627658	170627744	tctttatttgtatttgtacttcctgcttgttctccatgtgagtgcatgttagggtagAGGAAGCAGGGAGGACCATacacttaaaat	0						3'	New	gp4	..((((..(((((..((.((((((((((..(((((((((....)))).....)).)))..)))))))))).)).)))))..))))..	83	40.2	-26.8	123	86	48	111.754	72.7473	64.0754	middle
127	126	PC-5p-289319_5	TGAATACATAGGTGCAAGA	19	chr7	-	139790664	139790742	tcagaaTGAATTCATAGGTGCAAGAaaaacatggtctgccatttgaatttttgcttattactatgtacattcatttagt	0						5'	New	gp4	...((((((((.(((((..(((((((....((((....)))).....)))))))......)))))...))))))))...	73	30.4	-19	5	0	0	4.54284	0	0	low
128	127	PC-3p-13080_218	ACCGGCCCTGGGACACCA	18	chr8	+	20867799	20867878	cccccagttgctctagatgggtggcccagggctgccgggaagagtccACTGGCCCTGGGACACCAacagttaactggagc	0						3'	New	gp4	...(((((((..((.....((((.(((((((((...(((.....)))...))))))))).))))...)).)))))))...	74	63.8	-39.3	15	192	17	13.6285	162.413	22.6934	middle
129	128	PC-5p-161899_8	CAACTGTTTAACAAAAACAC	20	chr20	-	38951303	38951401	aaagtaaaaaggcCAACTGTTTAACAAACACACtaaatgctcagcctcagagggtttttttgtttgtttgtttgttttgagacggggtcttgctatgtt	0						5'	New	gp4	...(((..((((((..((((((((((((((.((.((((....(((((....))))).....)))))).))))))))...))))))))))))..)))...	93	37.4	-24.3	8	0	0	7.26855	0	0	low
130	129	PC-3p-116855_14	ACTGTGTTTGCATGGGTCGC	20	chr10	-	47636124	47636200	tttttgtttctagccttggaaatacatcagaaatagatctcctgACTGTGTTTGCATGGGTCCCttagaaatgactt	0						3'	New	gp4	...(..((((((((((((.(((((((((((...........)))).))))))).)).))))....))))))..)...	71	37.7	-20.8	8	6	0	7.26855	5.07539	0	low
131	130	PC-3p-174284_7	GTGGGGGAGCCTGGGCAGA	19	chr12	-	113643285	113643387	ggtgcaaatttggagttcctgtctcaggccaggctctctcatttcaccaccattaactgctctGTGGGGGAGCCAGGGCAGAgagagctccagctaaggcttc	0						3'	New	gp4	...((....(((((((((...((((..(((.(((((((((((.....((........))....)))))))))))..))).))))))))))))).....))...	97	55.3	-40.5	0	7	0	0	5.92129	0	low
132	131	PC-3p-141412_10	TCCTGGTGGTGATGGCGGTGT	21	chr2	-	20573785	20573874	gaaaacactgctgcagtcaccaaccaggccaccatgcagggcagcaaagcgcttggccctccttgTCCTGGTGGGGATGGCGGTGTtgtg	0						3'	New	gp4	...(((((((((...(((.((.((((((.((......((((((((.....)))..)))))...)).)))))).))))))))))))))...	84	61.1	-37.9	10	0	0	9.08569	0	0	low
133	132	PC-3p-265230_5	TTTCTTGGGCCTTTTCCTCCG	21	chr1	+	55930697	55930780	gcaggaaaatggccacaaaggtcaggggtgcattataactttcatagctctttgcacttttaaTTTCTTGGGCCTTTTCCTCCA	0						3'	New	gp4	..(((((((.((((.(((..(..(..((((((......((.....)).....))))))..)...)..))))))))))))))...	79	42.9	-26.2	0	0	5	0	0	6.67452	low
134	133	PC-5p-289925_5	GAATTTGTGGAGGTTTCTG	19	chr13	+	24845381	24845481	taaattaccaaaaagtGAATTTGTGGAGGATTCTGggaaaatgacagaacagttttagtctactggaatcccactataaaaacagcaacttggatagtaaa	0						5'	New	gp4	...((((((((...((...(((((((.((((((..(......(((..((....))..)))..)..))))))..)))))))....))...)))).))))...	95	33.7	-22.2	0	5	0	0	4.2295	0	low
135	134	PC-5p-209191_6	ACCTTCCGGCCTTTTTCTT	19	chr8	-	650064	650152	cgagcgctgagaccgcaACCTTCCGGCCTTGTTCTTctgaaccggcacgaaagccgagagcaggacacgcaggtcgcgctcagcgcagg	0						5'	New	gp4	...((((((((..(((.((((..((..((((((((.......((((......))))))))))))...)).)))).)))))))))))...	83	65.2	-40.1	6	0	0	5.45141	0	0	low
136	135	PC-3p-259657_5	TTTGGGCAAGTCTGGAAAAA	20	chr10	+	11658624	11658680	gagttcagactatgaccatgtcctgtgacagggcataTTTGGGCAGGTCTGGAAAAA	0						3'	New	gp4	...((((((((.((.((((((((((...)))))))....))).))))))))))....	50	47.4	-21.2	0	5	0	0	4.2295	0	low
137	136	PC-5p-166001_8	GCATTGGGGGCTGGGGGTAAA	21	chr11	+	61702477	61702552	GCATTGGGGGATGGGGGTAAAagtggatcctagggaaattagagatcatctggtcaaccccctcatcctccagatg	0						5'	New	gp4	...(((((((((((((((...((..((((((((.....)))).))))..)).....))))))..)))))))))...	70	51.3	-31.1	8	0	5	7.26855	0	6.67452	low
138	137	PC-3p-308356_5	ACTGTGATCCTAGGATTTCC	20	chr9	+	111181793	111181856	aaggtcctagaactgtttcagttgtgcattcatcctagtgcatcACTGTGATTCTAGGATTTCC	0						3'	New	gp4	...((((((((...((..((((..((((((......))))))..))))..))))))))))....	57	42.2	-22	5	0	0	4.54284	0	0	low
139	138	PC-3p-240723_6	GTTTTGCCGGGCCTGGGGT	19	chr3	+	42980500	42980586	tttccttccaagctcacagaaggcagatcggaacccactggagatgctttgtggggaGTTTTGCTGGGCCTGGGGTttagaaggctg	0						3'	New	gp4	...(((((.((((((.(((..((((((......(((((.((.....))..)))))....))))))....))))))))).)))))...	81	54	-30.6	0	0	6	0	0	8.00942	low
140	139	PC-5p-281348_5	GTAGGAGGAAGGCGGGGAT	19	chr2	-	12737404	12737496	aaggggcagaggaaaGGAGGAGGAAGGCGGGGATctcgaaccacaggcaccgtgagttctctccacagcttcctctacccattctcacccagc	0						5'	New	gp4	...(((..(((((..((..(((((((..(((((....(((((((.......))).)))))))))....)))))))..))..))))).)))...	87	59.1	-35.3	0	0	5	0	0	6.67452	low
141	140	PC-5p-30319_94	CGGGGACAGTGCATGGTAG	19	chr20	+	36434951	36435015	aggCGGGGACAGTGCAAGGTAGatacacgttgagatgtgtgtccacagtgcagtagttgctggcg	0						5'	New	gp4	...(((..((..((((..((.(((((((((....))))))))).))..))))...))..)))...	59	55.4	-22	70	90	16	63.5998	76.1309	21.3585	middle
142	141	PC-3p-50380_52	TAAGATCCGTGGTCAAAAG	19	chr8	+	83316128	83316264	tacgagagagcaaaataatggcaagcacaggtaaatttgatgaatatggaagctaaaacttagcaattaggctttagttTAAGATCCGTGGTCAAGAGtacataaaattggtaataattttcttcaattatctcaga	0						3'	New	gp4	...(((((((.(((((.((..(((......(((..((((((...((((((..((.(((((.(((......)))..))))).)).))))))))))))..)))......)))...)).))))))))......))))...	131	32.1	-25.9	15	39	15	13.6285	32.9901	20.0236	middle
143	142	PC-3p-97673_19	AAGTGGGAAGGCATAGACAG	20	chr2	-	114269477	114269567	agcttatgtcttcagtttaatagtttaaactctaacgatcaaatcagtaagtgtttattttgtaaattggtAAGAGGGAAGGCATAGACAG	0						3'	New	gp4	...((((((((((..((((((((..(((((.((.(((((...))).)).)).)))))..)))).......))))...))))))))))....	84	31.9	-17.9	14	5	5	12.72	4.2295	6.67452	middle
144	143	PC-5p-304182_5	TGAAGGTGAGTTGAGAAGC	19	chr6	-	35961154	35961248	agtaagggagagggTGAAGGTGAGTTGAGAAACaggactgatcattttctcagttgaacttgttttcatgatcattttcccctcattcccttttc	0						5'	New	gp4	...(((((((((((.(((..(((..((((((.(((((((((........)))))....))))))))))...)))..))))))))..))))))...	89	41.1	-36.2	0	5	0	0	4.2295	0	low
145	144	PC-5p-290490_5	CTCGAATTGTCATTTCCACA	20	chr11	+	112915326	112915399	atCTCGAATTGTCATCTCCACAtgtcgatgaggaacctgtaatcacatgtcaagggagagaggcgattggatca	0						5'	New	gp4	...((.(((((((.(((((((((((.(((.((....))...)))))))))....)))))..))))))).))...	68	45.9	-23.5	5	0	0	4.54284	0	0	low
146	145	PC-3p-53230_48	GTGGAGGGTCATTGGAAAC	19	X	+	87391738	87391794	gcagtttttgatgtcatcctgactacagtactctgGTGAAGGGTCATTGGAAACatt	0						3'	New	gp4	...(((((..(((..(((((.....(((....)))....))))))))..)))))...	51	42.1	-16.8	16	19	13	14.5371	16.0721	17.3537	middle
147	146	PC-5p-107846_16	AATCCAGCCCTCTCCACCA	19	chr1	-	22598468	22598602	agagcacccagcaaagaaactgtgggcaggagctgggAATCCAGCCGTCTCCACCAcagccagcatgccccccagctgggtggggcctggattcccacagaggcacccccctcagcctgtgtgcagggcagcagg	0						5'	New	gp4	...((.(((.(((......(((.(((..((.(((((((((((((..(((.(((((.((((..............))))))))))))))))))))))).....)).)).))).)))......))).)))..))...	129	65.9	-58.2	6	8	8	5.45141	6.76719	10.6792	middle
148	147	PC-5p-83623_25	AGTGTGGAAGAGATAACCG	19	X	+	68030550	68030628	aagAGTGTGGAAGAGATAGCCGctccccaggatagcaaatgagttctcaggagggtgaaggctcccaagccacactacc	0						5'	New	gp4	...(((((((..(((...(((.((((..(((((.........)))))..))))))).....))).....)))))))...	73	54.4	-26.3	0	45	10	0	38.0655	13.349	middle
149	148	PC-3p-101103_18	ACCTTTGACATGGCAGGAA	19	chr19	-	27773789	27773854	ctggtcaaccttagaagtgacaagggacagccacctggtcgACCTTTGACATGGCAGGATgacagc	0						3'	New	gp4	...((((.(((.....(((.((((((...(((....)))...)))))).)))...))).))))...	60	54.5	-20.1	14	35	0	12.72	29.6065	0	middle
150	149	PC-3p-80058_27	ATTTTGATTTTCAGTGTGAAT	21	chr5	+	104494825	104494925	aaaacacttgaaatatgtttaaatataattaaactagaatacctctttaaaggagagagtagaggatactgggatgaacaATTTTGATTTTAAGTGTGAAT	0						3'	New	gp4	...(((((((((((......((((....(((..((((.((.(((((..............))))))).))))..)))...))))..)))))))))))....	94	26.7	-20	21	6	0	19.0799	5.07539	0	middle
151	150	PC-5p-319048_5	CTTCCACGGCCTGTTCCAGC	20	chr6	-	124532132	124532209	ccctgcaccttCTTCCACGGCTTGTTCCAGCaataaatctagatctgtacattctccctggaagcagtttctgcacac	0						5'	New	gp4	...((((.((.((((((.((..(((..(((...((....))...))).)))....)).)))))).))....))))...	72	48.7	-15.4	0	5	0	0	4.2295	0	low
152	151	PC-5p-187783_7	TAACTCTGCTCCATTATCTG	20	chr12	-	43695530	43695691	tttgctactcaaatcttgtttttttttttcctaatggtaccttgcttttgctctttttatgtTAACTCTGCTTCATTATCTGtattcttgacgtgatgaaaattcaggttcatatctgagcagtggtggtcatgtggaattagaaagacctttgggggttat	0						5'	New	gp4	...(((.((((((....((((((((..((((..(((..(((..((..((((((....((((..(((.(((.((((((((...((....))..))))))))....))))))))))...))))))..))))))))..))))..)))))))).)))))))))...	156	35.2	-38.8	7	0	0	6.35998	0	0	low
153	152	PC-3p-309308_5	CTTGGTGCTGGCTGCGCTGCTG	22	chr16	-	66406842	66406911	agatccggcggccaaggtcagccgctctcggagagccgagattCTTGGTGCTGGCTGGGCTGCTGgagac	0						3'	New	gp4	...((((((((((..(((((((.((((((((....))))))......))))))))).))))))))))...	64	65.7	-37.8	5	0	0	4.54284	0	0	low
154	153	PC-3p-165444_8	GTATTGTCGATTTTGAAATT	20	X	-	77873735	77873827	ttagatgaggggggtaagttctggtgatctattgcacagcatggtgaccatagttaatGTATTGTAGATTTTGAAATTgctaaaaacatttta	0						3'	New	gp4	..(((((.....(((((.(((....(((((((((((.(((((((...)))).)))..))))..)))))))..))).))))).....)))))..	89	34.4	-18.6	0	8	0	0	6.76719	0	low
155	154	PC-3p-280269_5	GAGTTGTGGGTAGGGGTGAA	20	chr4	-	118706182	118706271	acgattccaactatgtaacattctgacaaaggcaaattacggagacagtaaaaagataagtggttgtcaaGAGTTGTGGGTAGGGATGAA	0						3'	New	gp4	...(((((.(((...((((.(..((((((..((...((((.......))))........))..))))))..)))))..))).)))))...	84	38.9	-17.3	0	10	0	0	8.45899	0	low
156	155	PC-5p-239308_6	ATACTGAGATGTGATGACG	19	chr9	+	137780085	137780180	tgatgATGCTGAGATGTGATGACGctgggatgtgtggtgatgacgctgagatgtgtggtgatgacgctgagatgtgtggtgatgacggcatcactg	0						5'	New	gp4	...((((((((....((.(..((((......((((..(.(..((((......))))..).)..))))......))))..).))..))))))))...	90	52.1	-24.7	0	6	0	0	5.07539	0	low
157	156	PC-5p-294896_5	GTCCCAAGGGTTTGGCTGT	19	chr1	-	67758310	67758391	ttagttcaGTCCCAAGGGTTTGGTTGTttgtttattctaatgtgttgctgcaataggaaacccaaagctagggctggacgca	0						5'	New	gp4	...(((((((((...((.(((((..(((......(((((.(((......))).))))))))))))).)).)))))))))...	76	43.9	-24.4	5	0	0	4.54284	0	0	low
158	157	PC-5p-121537_13	TGAACTGAAGAGTTTTATC	19	chr3	-	16694294	16694367	gattccTGATCTGAAGAGTTTTATCttgggtagtactggtttccagtgatcgacggtttaggtacacaggattt	0						5'	New	gp4	...((((((((((((..(((..((((((((...........))))).))).)))..)))))))...)))))...	68	41.9	-20.2	0	8	5	0	6.76719	6.67452	low
159	158	PC-3p-36490_76	GGCTAGGGGGTCATGGCGA	19	chr17	-	2027912	2028015	aactctgcttctcacactcacgcccagccccagccaacttttcctaagacgctagagtttgtgGGCTAGGGGGTCATGGGGAggcggcttggagaggtggaagg	0						3'	New	gp4	...((..((((((.((....((((...((((((((..((..(((..((((......))))..)))..))..)))..))))).))))...))))))))..))...	98	58.7	-42.5	57	41	25	51.7884	34.6819	33.3726	middle
160	159	PC-5p-97917_19	AGTGACTAAGAGCATATGGT	20	chr8	+	71094770	71094837	tctttgAGTGACTAGGAGCATATGGTgaaactcaataattttagtatatagcacctttcactcaggca	0						5'	New	gp4	...((((((((..(((.((((((..(((((........)))))..)))).)).))).))))))))...	62	36.8	-18.7	12	24	5	10.9028	20.3016	6.67452	middle
161	160	PC-3p-212668_6	AGGCTGAGCTGTGATGCGGA	20	chr10	-	11441597	11441697	ttataaaacaggctttgcgtgagctgattttgcccacaggcaggctaatgggagcgttgagtgcatgtttcgggtaggccAGGCTGAGCTGTGATGTGGAg	0						3'	New	gp4	.((((..(((.(((..((.((.(((.....((((((((.(((...(((((....)))))..))).)))...)))))))))).))..))))))..))))...	97	52.5	-29.8	0	6	0	0	5.07539	0	low
162	161	PC-5p-228593_6	TACTGCATGGCTAGAGTAC	19	chr21	-	15906642	15906704	aaTACTGGATGGCTAGAGTACatatgttgcaatactgttgtatttgaggcaacagccagttat	0						5'	New	gp4	...(((((...(((.(((((((...((......))...)))))))..))).....)))))...	57	38.1	-16.8	0	6	0	0	5.07539	0	low
163	162	PC-3p-78494_28	GCTGTTTGCGGATGGTCT	18	chr1	+	204616097	204616179	gctgtagccttgagtgaggacctcggccaaaaagaaggctcctaccgtgGCTGTTTGCTGATGGTCTtcgcagagcctgctgt	0						3'	New	gp4	((.((((.(((..((((((((((((((.(((.((..((......))....)).)))))))).))))))))).))).)))).))	83	56.6	-31.6	0	37	0	0	31.2983	0	middle
164	163	PC-3p-115319_14	AGAGCACTGTTATGGCTAGG	20	chr5	-	175581628	175581718	ggtggtggggggctgcaggcccttaaaatgtggtcgctgctccatctcaggaAGAGCACTGATATGGCTAGGccttgtgtccccacccaaa	0						3'	New	gp4	..(((..((((((.(((((.(((....(((((((.(((..(((......)))..)))))).))))....))).)))))))))))..)))..	87	58.2	-36	6	18	0	5.45141	15.2262	0	middle
165	164	PC-5p-198394_6	GGACCGAAAGGACCGGTGG	19	chr19	+	49133576	49133652	ctagcctGGACTGAAAGGACCGGTGGcctggaacctgagagggaaggaacaggtcctgaaaaagtggactaggcgca	0						5'	New	gp4	...(((((((((...((((((.((..(((....(((....))).))).)).)))))).....)))...))))))...	71	57.1	-30.1	0	6	0	0	5.07539	0	low
166	165	PC-5p-149389_9	GAATAATAGAATAGGACGT	19	chr7	-	132629385	132629470	tcagcattaGAATAATAGAATAGGACCTaccagatgccctttacaagtctacatactcaggtatctatctatgactttagtgcagg	0						5'	New	gp4	...((((((((...(((((.((((((((.....(((...............)))....)))).)))))))))...))))))))...	80	38.4	-18.5	9	0	0	8.17712	0	0	low
167	166	PC-5p-322669_5	CTAGTCTATGGAAGTTTGA	19	chr5	+	18048319	18048421	gttggctttaaaacttctgttCTAGTCTATGGAATTTTGAatgtaggggcttggtccatgtgtggaaaatacttagtttagaatattaaagtgaagagctgta	0						5'	New	gp4	...((((((...((((.(((((((..(((.((.(((((..(..((.(((.....))).))..)..))))).)))))..)))))))...))))..))))))...	97	35	-24.7	0	5	0	0	4.2295	0	low
168	167	PC-5p-323353_5	TTTGTGTTGGCGGCGGGAG	19	chr6	+	14456139	14456201	ccacaggagtgTTTGTGTTGGAGGCGGGAGtgttaaattccaacctcagcacaactcttgaag	0						5'	New	gp4	...(((((((...(((((((.(((..(((((.....)))))..)))))))))))))))))...	57	49.2	-28.2	0	5	0	0	4.2295	0	low
169	168	PC-5p-209565_6	CTCAGAACCTTACCAGCTCT	20	chr20	-	6677840	6677939	gaagagCTCAGAAACTTACCAGCTCTgcagttcccagtactacataacaatatctactcttactgttattaaagcattaggtaaagtttctcccctccat	0						5'	New	gp4	...(((...(((((((((((.(((..(((((....((((...............))))...)))))......)))....))).))))))))...)))...	94	39	-18.9	0	6	0	0	5.07539	0	low
170	169	PC-5p-245221_5	ATTGATTATAGGGTTTCTG	19	chr5	-	66555763	66555833	aatttattgttcATTGATTATAGAGTTTCTGtttgggaaacagaaacagttctggaaatagatagtagtga	0						5'	New	gp4	...(((((((..(((.....((((((((((((((...))))))))))...))))..)))..)))))))...	65	29.6	-15.9	0	5	0	0	4.2295	0	low
171	170	PC-3p-32406_88	CTTTGTATTGGATTTTGAA	19	chr5	-	78103723	78103795	ttatttgaagtgaaatacattaaatagaaatcagtttttttgaccctgtgaCTTTGTATTGCATTTTGAAaat	0						3'	New	gp4	...((..(((((.((((((....((((...((((.....))))..)))).....)))))).)))))..))...	67	24.7	-15.2	54	27	7	49.0627	22.8393	9.34433	middle
172	171	PC-3p-313568_5	ACTGTAAGGTGTGGAGGCT	19	chr16	-	87843949	87844031	tctcttcctcacttccctgtcacgctgtcccctccttgtgggtggaggctgactggatagcagACTGTCAGGTGTGGAGGCTg	0						3'	New	gp4	...(((((.(((((....(((..((((((((((((........)))))......))))))).)))....))))).)))))...	77	59	-33	0	5	0	0	4.2295	0	low
173	172	PC-5p-4206_634	CATCTCATCCTGGGGCTGTA	20	chr16	+	88594060	88594179	ttagatgcccctccctctctagctgCATCTCTTCCTGGGGCTGTAatgtcctctcctgcttgagccacagcggcccttcatggtcgatcgcatgcagatgggaggccaggggttttccag	0						5'	New	gp4	...((.((((((.((((((...((((((.((..((.((((((((..((..(((........))).))..))))))))....))..))....))))))..))))))..))))))..))...	114	58.3	-46.9	208	356	70	188.982	301.14	93.4433	middle
174	173	PC-3p-5873_458	CTCAAGAGGAGATCTCACTGGA	22	chr10	+	7841541	7841626	ggggttaggatgatttcattataaattctgttggtactgagaaggatggaCTCAAGAGGAGATGTCACTGGAagagtcttgataaa	0						3'	New	gp4	...((((((((..(((((..(((..((((.(((((.((.........)))).))).))))..)))...)))))..))))))))...	80	39.5	-18.3	29	190	389	26.3485	160.721	519.278	high
175	174	PC-5p-283802_5	TTGAGATTTGAGAGGGGC	18	X	+	116142270	116142364	ttttgaaatgtgaggacTTGAGATTTGAGAGGGGCcggggcagaatgatatggtttggctgtgtccccatccaaacctcaacttaggttttatct	0						5'	New	gp4	...(((((..((((...(((((.((((.((((((.((..((..(((......)))..))..)).)))).)))))).)))))))))..)))))...	89	45.3	-26.8	5	0	0	4.54284	0	0	low
176	175	PC-5p-220653_6	AATTTGGAAGGGCTTTTTTA	20	chr2	+	162953678	162953771	ggattagagcAATTTGGAAGGGCTTATTTAtcctgaataacatggtctgaaggtccagttttagaaattttaagcctaccaaattttctaagaa	0						5'	New	gp4	...((((((.(((((((..(((((((......(((((..((.(((.(.....).))))))))))......))))))).)))))))))))))...	88	34	-25.8	6	0	0	5.45141	0	0	low
177	176	PC-5p-252007_5	ATTTATCAGTGAGACTGTG	19	chr8	-	94242984	94243082	cccATTTATAAGTGAGACTGTGcagtatttgtctctgtttctgagttgcttcacttcaaacaatggctactagttctacccatcttgcttctaaatacg	0						5'	New	gp4	...(((((.(((..(((..((((((((...(((..(((((..((((......)))).)))))..))))))).))...))...)))..))).)))))...	93	39.4	-17.6	5	0	0	4.54284	0	0	low
178	177	PC-3p-286282_5	CCGGATGGAATAAGGAAAAG	20	chr6	-	68998286	68998425	tcagccatgcatatttttttaactaaatagaagtgatactcttttactttgataagttctaattatcttcacaggataatCAGGATGGAATAAGGAAAAGctatacacttttttggtttaagaaaaatgtaggggttata	0						3'	New	gp4	..((((.(((((.((((((.(((((((..(((((((((..(((((.(((((....(((((.(((((((.....))))))).)))))....)))))))))).))).))))))))))))).)))))).)))))..))))...	135	28.6	-38	5	0	0	4.54284	0	0	low
179	178	PC-5p-32959_86	GGGGATGAGGTGTGGGTAG	19	chr3	-	8247403	8247474	tacaGGGGATGAGGTGAGGGTAGtaaaagcatttttaaatggatataactagcttcaaatttgttcctttgg	0						5'	New	gp4	...((((((..((.(((((.((((.....((((....))))......)))).)))))..))..))))))...	66	36.1	-17.6	43	91	34	39.0685	76.9768	45.3867	middle
180	179	PC-3p-129091_12	AGAACTTTGAAGACTGAAG	19	chr1	-	108118968	108119066	ttagctacttcatttttggaatttttgctttatttatgttacctttaagaagaattgacatagtaggtgagaaAGAACTTTGGAGACTGAAGaagtaaa	0						3'	New	gp4	...(((.(((((((((..((.(((((.(((...((((((((.(((....)))...)))))))).....))).))))).))..)))).))))).)))...	93	29.3	-21.3	5	7	0	4.54284	5.92129	0	low
181	180	PC-5p-87755_23	AGTACCTGCAGGAAAGGAC	19	chr5	+	161257037	161257105	taaagacAGTACCTGCAGGAAAGGAAcatataaacctcctggccacctttccactgccagctgtctgac	0						5'	New	gp4	...(((((((....((((((((((..((...........))....)))))))..)))..)))))))...	63	49.3	-19.3	0	23	0	0	19.4557	0	middle
182	181	PC-5p-305917_5	CCGGCTGAGGTGGGATCCCG	20	chr19	-	53655018	53655133	tgaaggtgaaggccagcgtgctatCCGGCTGAGGTGGGATCCCAtggcctcttcagtccactgagggtgcaccatctcacctgctgtgctgggtaggcggagcacaaccacctgtg	0						5'	New	gp4	...(((((...((...(((.(((((((((..(((((((((......((..((((((....))))))..))...))))))))).....))))))))))))..)).....)))))...	110	61.2	-47.2	0	5	0	0	4.2295	0	low
183	182	PC-3p-15985_180	GGATGTTGGCTTAGAAGC	18	chr5	+	153798717	153798839	aagtctctctaccctaggactagctcagacctcctcatgaatcagccctacattcttggaagGGATGTTGGCTCAGAAGCacagagggaacctgagacagtcccccagtatgtggaaagaaca	0						3'	New	gp4	...(((.(((((.((.(((((..(((((...(((((.((..((((((..(((((((.....))))))).))))..))..))..)))))...)))))..)))))...))...))))).)))...	117	50.4	-41	142	135	58	129.017	114.196	77.4244	middle
184	183	PC-5p-10857_261	GCATCCTGGGGCTGTAGTC	19	chr3	-	125433830	125433923	ttgagaatctctgccctaagGCATCCTGGGGCTGTAGTAttaacaataatagttttgtggctaagggtgtggactttccgcagacagatctgta	0						5'	New	gp4	...((.((((((((...((((((((((..(((..((((((((....)))))...)))..))).)))))))...)))...)))))..)))))...	88	44.7	-25.2	302	272	143	274.388	230.085	190.891	middle
185	184	PC-5p-158714_8	TAGGGATAGTTGGGGGCAT	19	chr5	-	149210048	149210111	aggTAGAGATAGTTGGGGGCATcggagagcttagctttgcttcgggctctgcctcgctctaatg	0						5'	New	gp4	...(((((..((...(((((.(((((((((...)))...)))))))))))..))..)))))...	58	54.7	-18.2	8	0	0	7.26855	0	0	low
186	185	PC-5p-320943_5	GTACGGGTGGTGGAGTCGG	19	chr9	+	123960610	123960677	gttaagaGTACAGGTGGTGGAGTCGGaaaaacctgggttccatttcttactctagcactgctcttgcc	0						5'	New	gp4	..(((((((...((((.((((((..(((((((....)))...))))..)))))).)))))))))))..	64	48.5	-24.6	0	5	0	0	4.2295	0	low
187	186	PC-3p-300172_5	CCTGCTGCTGGGCCGTCTGC	20	chr9	-	133883517	133883615	gctggtggcattgcacaggtgaccggaagcctccccaggtccagtgcctgagggcctgctccggccgagctgaaacctgCCTGCTGCTGGGCCGCCTGC	0						3'	New	gp4	((.((((((...(((((((((.(((((.((..((((((((.....))))).)))...))))))).)............))))).)))...)))))).))	99	69.7	-45.9	5	0	0	4.54284	0	0	low
188	187	PC-5p-221339_6	ACCTGCTCAAGATCGCCCT	19	chr16	+	8803342	8803428	tcctgttACCTGCTCATGATCGCCCTttctgcatctagttgtgtatttaaccacttgctcagggaagttttgtgtagtgtagcatag	0						5'	New	gp4	...((((((((((.((..((..((((....(((....((((......))))....)))..))))..))..)).)))).))))))...	81	43.7	-25.6	0	6	0	0	5.07539	0	low
189	188	PC-3p-153504_9	GGGGCTGGTGAAACCCTGTC	20	chr2	-	24087852	24087939	gccgaggcaggtggattgcctaagctcaggagtttgcgaccagcctggactgttgcaaaacccTGGGCTGGTGAAACCCTGTCtctac	0						3'	New	gp4	...((((((((....(..((..((((((((..((((((((.((......))))))))))..))))))))))..)...))))))))...	82	58	-42.2	0	9	0	0	7.61309	0	low
190	189	PC-3p-146278_9	CAGGTGATCTACCCATGTCC	20	chr18	+	63251880	63251953	gtagagatggggtttcaccatgttggtcaggctggtctcaaactcctaacctCAGGTGATCTACCCATGTCGac	0						3'	New	gp4	...((.(((((...(((((.((..(((.(((..(((.....)))))).))).)))))))....))))).))...	68	51.4	-26.7	0	9	0	0	7.61309	0	low
191	190	PC-5p-59193_42	TGAGATTTGAGAGGGGCTGC	20	chr21	-	26183855	26183930	gggacaTGAGATTTGAGAGGGGCTGGggcagaatgatatagtttgtgtacttatccccacccaaatctcatgtgga	0						5'	New	gp4	...((((((((((((...((((..((..((.((.........)).))..))...))))...))))))))))))...	70	47.4	-27.8	36	9	10	32.7085	7.61309	13.349	middle
192	191	PC-5p-235035_6	CATCCACATCGGCAAGAAG	19	chr10	+	96073888	96073967	tgggtcacataacCATCCACATCTGCAAGAAGgccaatgagggtcttgcaaaatgaaacaagatggttatgactgacaca	0						5'	New	gp4	...((((((((((((((..(((.(((((((...((.....)).)))))))..)))......))))))))))..))))...	74	43.8	-25.5	6	0	0	5.45141	0	0	low
193	192	PC-5p-214326_6	CGCAGTGAAAAGGCCCAAG	19	chr1	+	94643949	94644038	taCGCAGTGTAAAGGCCCAAGtacagcaaagccctctgaagctcgacaggagcttgcttccggttacttcttggaccctatcgctgcctc	0						5'	New	gp4	...((((((....((.(((((...(((.((((......((((((.....))))))))))...)))....))))).))....))))))...	84	54.4	-27.7	0	6	0	0	5.07539	0	low
194	193	PC-3p-318139_5	GATAAAGGGAGTGAAAAGCT	20	chr20	+	31352996	31353094	atagttctctgagtattttacccttcaagtaaatagaaaataagtaagaatatttacattGATTAAGGGAGTGAAAAGCTtaatttaatagaggacgtt	0						3'	New	gp4	...((((((((((..((((((((((((((((((((...............))))))).))))....))).))))))..)))........)))))))...	93	27.3	-23.2	5	0	0	4.54284	0	0	low
195	194	PC-3p-35260_79	GTTCTCATGGAGCCGACG	18	chr6	-	154579574	154579670	gagttctattatgtgccaagtattgaggattcacgagtgactcagacaagaatccctGTTCTCATGGAGCCTACGtttactatggtttgtggagaaa	0						3'	New	gp4	...((((((.....((((((((.(((((.((((.(((.(((...((......))...)))))).)))).))).))..)))).))))..))))))...	91	42.3	-21.6	53	150	19	48.1541	126.885	25.3632	middle
196	195	PC-5p-276152_5	ATCGTGACCTCCACTCTGGG	20	chr19	-	1125117	1125183	ggtctcgaaATCCTGACCTCCACTCTGGGaggccttggcctcccaaagtgctgggatttacgggtgt	0						5'	New	gp4	...(((((((((((......((((.((((((((....)))))))).))))..))))))).))))...	61	58.2	-32.9	5	0	0	4.54284	0	0	low
197	196	PC-3p-69314_33	GAGTAGGATGTTGCTAGGC	19	chr3	-	156534580	156534661	ctgggcattagtaaagtcctcccaggattgggttcctattgatctggaacttggggatgGAGTAGGATTTTGCTAGGCtggg	0						3'	New	gp4	(..(((.(((((((((((((.(((...(..((((((.........))))))..)...)))...))))))))))))))))..)	82	50	-33.4	13	26	0	11.8114	21.9934	0	middle
198	197	PC-5p-243565_5	TATGTTGGTTCAAGTCTGTA	20	chr1	-	72637178	72637268	aTATGTTGCTTCAAGTCTGTAgtacaatgaaatcaggataatttcaactcagtctgattatcaaaggtaagtactttcttgaaaaacactg	0						5'	New	gp4	...((((..((((((...(((.(((..((((((((((...............))))))).)))...)))..)))...)))))).))))...	85	31.9	-18.9	0	5	0	0	4.2295	0	low
199	198	PC-3p-150879_9	AGATGTCTGAATGGGGGAA	19	chr8	-	36813263	36813359	ttttttctcctcagctcacatattttctagatgttttccatttctatttagcacaaaagatgataaaatcttagAGATGTCTGACTGGGGGAAgtgg	0						3'	New	gp4	...((((.((((((.(((.(((((((..((((.(((..(((((..............)))))..)))))))..))))))).)))))))))))))...	91	35.1	-23.1	9	8	0	8.17712	6.76719	0	low
200	199	PC-3p-131324_11	GTAGGTCATTGTCAAGATT	19	chr14	-	39686184	39686268	ttaggagatgaagtcagtgcagtcacagggacacgatcagcctcggctttGTAGGTCATTGTAAAGATTgtaacttttatccaaa	0						3'	New	gp4	...(((...(((((...((((((((((..(((((((..(((....)))))))..)))..)))...))))))))))))..)))...	79	42.4	-22.2	0	11	0	0	9.30489	0	low
201	200	PC-5p-199481_6	TTGGGGTGGGGGAGTGTTG	19	chr1	-	107523191	107523261	agaacaggTTGGGGTGGGGGAGTGTGGtaggagactgagagtctggtcgcaccttgtcttaagcccgtgat	0						5'	New	gp4	...((.((((..((..(((...(((((....((((.....))))..))))))))..))..)).)).))...	65	56.3	-18.8	0	0	6	0	0	8.00942	low
202	201	PC-5p-263666_5	ATTCGTAGATATTTGTAGGAA	21	chr5	-	90538485	90538610	agtaggattttgataggaattacattgaATTTGTAGATATTTGTAGGAAgtattgtcatcttaatgatattaattcttccaatccatcaacacatcatgtctttccatttctttagatattcttta	0						5'	New	gp4	...((((((((((..((((..(((.(((...(((.(((..(((.(((((.((.((((((....)))))).)).))))).)))...))).)))..))))))..))))......))))).)))))...	120	27	-23.2	0	5	0	0	4.2295	0	low
203	202	PC-5p-58090_43	AGAGCGTTCTGTAAGCCTG	19	chr6	+	133549384	133549442	taacAGAGCGTTGTGTAAGCCTGctggtccctttctctagtggtggcaaccctttgaat	0						5'	New	gp4	...(((((.(((((....(((.(((((.........)))))))).))))).)))))...	53	49.2	-15.9	56	35	35	50.8799	29.6065	46.7216	middle
204	203	PC-3p-82153_26	ATAAGCGGAGGAAAAGAAA	19	chr7	-	42421500	42421560	aaaagttttcttgtaaaccttctcctgagaggtagaATAAGAGGAGGAAAAGAAAattagg	0						3'	New	gp4	...(((((((((.....(((((((((....))........)))))))..)))))))))...	55	34.4	-15.1	12	14	0	10.9028	11.8426	0	middle
205	204	PC-5p-258110_5	TCTGTAAGCCTGTGAAGGT	19	chr17	-	79990460	79990555	TCTGTAAGCCTGTGTAGGTtgtccccaccccagcaattggtcgtgaacttcaagcattgggaaatcacgtgggaggtggctgcccaggctcacctc	0						5'	New	gp4	...((.((((((.((((.(..((((((((((((...((((.........))))...))))).......))))).))..))))).)))))).))...	90	56.2	-34.1	0	5	0	0	4.2295	0	low
206	205	PC-5p-216570_6	ATGAAATATCAGGACTTGAGT	21	chr12	+	80395962	80396050	acatagtcaggagagaATGAAATGTCAGGACTTGAGTgcattaatctctgcttctcttgctctgccagtttcattctttcctactgcat	0						5'	New	gp4	...((((.(((((((((((((((..((((....(((.(((........)))..)))....))))...)))))))))))))))))))...	83	41.6	-31.8	0	0	6	0	0	8.00942	low
207	206	PC-5p-52939_49	GGTGAGTGTGGCGAAGTGG	19	chr11	+	15736102	15736194	cttgatcactgagcataatagGGTGAGTGTGGAGAAGTGGtagaagttcaaattcaagcttttccctagctcatcactagctctgggatctca	0						5'	New	gp4	...((((...((((....((((((((((..((((((((....(((.......)))..))))))))...))))))).)))))))...))))...	87	44.1	-32.7	25	9	15	22.7142	7.61309	20.0236	middle
208	207	PC-5p-20358_142	CGGTGGTTCTGTATGGAAG	19	chr11	-	66328696	66328758	caCGGTGGTTCTGTATGCAAGtttattgtctgtttccctcactagaatgccagagccaccccc	0						5'	New	gp4	...((((((((((...(((..((((.((...........)).)))).)))))))))))))...	57	50.8	-19.4	200	96	31	181.714	81.2063	41.382	middle
209	208	PC-5p-92897_21	CTGCTTCCAGGAAAAGCCAC	20	X	+	32151527	32151584	taCTGCTTCCAGGAAATGCCACaatacctccttattatttacatttctggaagcaaag	0						5'	New	gp4	...(((((((((.(((((....((((......)))).....))))))))))))))...	52	37.9	-17	16	0	5	14.5371	0	6.67452	middle
210	209	PC-3p-276959_5	TAGAACTGCCATTGATTAT	19	chr3	+	38394299	38394384	gtgaaagttaatttatatattttctattgtatttgatagttgattattatTAGAAATGCCATTGATTATtataagttgattttgta	0						3'	New	gp4	...((((((((((((((.((..((.((.((((((((((((.....)))))))..))))).)).))..))))))))))))))))...	80	18.6	-16.6	0	5	0	0	4.2295	0	low
211	210	PC-5p-10725_264	AGTTTGACTGGGGCGGTCG	19	chr6	-	162023470	162023539	gaaccacgtggAGTTTGGCTGGGGCGGTCGgaggagagccctggccccgaagcagcccgactccagggaa	0						5'	New	gp4	...((...((((((..(((((.((.((((((.((....))))))))))....)))))..))))))))...	64	68.6	-32.7	89	214	36	80.8626	181.022	48.0565	middle
212	211	PC-5p-269486_5	CAAGATGATATCTGCCGGG	19	chr2	+	169945616	169945673	aCAAGATGATATCTGCCAGGccattttgttacttgtggtattttaggtatcttctggt	0						5'	New	gp4	((.(((.((((((((....(((((..........)))))....)))))))).))).))	58	37.9	-15.8	0	5	0	0	4.2295	0	low
213	212	PC-3p-105495_17	AGGTGTGGGTAGGGGTGA	18	chr7	-	16053258	16053345	ttttttccctctaccagcactaagtttcaagatgagcaattaattctttttatcattagcagcagAGGTGTGGGTAGGGGTGGgaggt	0						3'	New	gp4	..((..(((((((((..((((..(((....(((((.................)))))...)))...))))..)))))))).)..))..	84	42	-23.8	12	10	0	10.9028	8.45899	0	middle
214	213	PC-3p-106405_17	AGAGAACCCGGGAGAAGGAA	20	chr2	-	218860225	218860324	tgtcttcccgaaagatctttcctacccactcgcctgttccttggtgagctgggtgagcgcataacttggcggggggtgggAGAGAACCCGGGAGGAGGAA	0						3'	New	gp4	..((((((((.....((((((((((((.(((((((((((((..(....)..)).)))))........))))))))))))))))))...))))))))....	94	59	-52.4	28	12	0	25.4399	10.1508	0	middle
215	214	PC-3p-65276_36	GATGTCGGCTCATCTCAT	18	chr3	+	66127997	66128070	gcttttgagatagagtttcgctcttgttgcccaggctggagtgcaatggtacGATGTCGGCTCATCTCAAactc	0						3'	New	gp4	...((((((((.((((..((...((((.(((...((......))...)))))))...))))))))))))))...	68	50	-20.8	18	33	26	16.3542	27.9147	34.7075	middle
216	215	PC-3p-107090_16	TGCTTCCAGGAAAAGCCACT	20	chr15	+	48697581	48697686	gctgtgtcttgggtcagttttcctggaagcagactctgagatgaagatttatgtgccaatgattgagtaaggaagTGCTTCCAGGAAAAACCACTcaggagatgag	0						3'	New	gp4	...((.((((((((...((((((((((((((...(((...((...((((.((......))))))..))..)))..))))))))))))))...)))))))).))...	100	45.3	-36.8	6	0	10	5.45141	0	13.349	middle
217	216	PC-3p-71379_32	TCCGTGGACAAGAGGGAAA	19	chr9	-	137116110	137116184	cccttcccggcttgggaggccctggctgctgcccagaggggcatcaatgcctggGCCGTGGACAAGAGGGAAAgt	0						3'	New	gp4	...(((((..((((...(((((.(((((.(((((....))))).))..))).))))).....)))).)))))...	69	66.7	-39.2	61	32	25	55.4227	27.0688	33.3726	middle
218	217	PC-3p-71265_32	AGGTTGGGTGTGGAAGCG	18	chr20	+	33486140	33486264	agcctcccaaagtgctgggattacaggcgtgagccactgggcccggtctctcttacttgaatcttaaaaagtttgaAGGTTGGGTGTGGTAGCGcgtgcttacaattctagcactttgagaggcc	0						3'	New	gp4	.(((((.(((((((((((((((.((.((((..(((((...(((((..((.((..((((..........))))..))))..)))))))))).)))).)).....))))))))))))))).))))).	123	51.2	-60.2	13	17	7	11.8114	14.3803	9.34433	middle
219	218	PC-3p-247004_5	TATTGAAATGCTGATTTTTG	20	chr6	+	12133446	12133536	ttataaaattgctaggagatatttgcatttcaatatgggcacactttcaatattttgtaTATTGAAATGCAGATTTTTGtttattttacat	0						3'	New	gp4	...((((((.((...((((.(((((((((((((((((....................)))))))))))))))))))))))..))))))...	85	24.2	-18.1	0	0	5	0	0	6.67452	low
220	219	PC-3p-178411_7	AAGGTAAAATTTGTGAGTTC	20	chr3	-	56541837	56541899	tttacagggatacaaaaagtgtaccttgtacccaaacAAGGTAAAATTTGTGATTTCtgtcat	0						3'	New	gp4	...((((..(((((((.....((((((((......))))))))...)))))).)..))))...	57	33.3	-20.2	0	17	0	0	14.3803	0	middle
221	220	PC-5p-312582_5	ACTGAATCGTGCAGGAAGA	19	chr2	-	195535875	195535942	ccatcagtaACTTAATCGTGCAGGAAGAacagatattgttctcattgcataaatgaggaatctgagat	0						5'	New	gp4	...((((...((((...((((((..(((((((...)))))))..))))))...))))....))))...	62	36.8	-19.6	5	0	0	4.54284	0	0	low
222	221	PC-5p-182044_7	GACGGTGATAGGATTTACT	19	chr8	+	96325039	96325106	tagatGACGGTGATAAGATTTACTggtgcctactatgtgccagagaccattctaagcactgtcatgaa	0						5'	New	gp4	...(((((((((...((((((.((((..(.......)..)))))))....)))...)))))))))...	62	42.6	-22.4	0	12	0	0	10.1508	0	middle
[truncated: 35 more rows]
